# Supplementary material for: Maize root-associated microbes likely under adaptive selection by the host to enhance phenotypic performance
Source: bioRxiv preprint, doi:10.1101/2021.11.01.466815, version 1 (2021-11-02)
Supplement: Supplementary Dataset 1 [file 466815_file07.csv]

Sample_ID	SRA_filename	year	genotype	GRIN_Accession	subpopulation	nitrogen_treatment	block	split_plot	split_plot_block	subplot_id	quadrant	range	row	subsample	asv_000048	asv_000082	asv_000141	asv_000187	asv_000148	asv_000134	asv_000159	asv_000171	asv_000128	asv_000178	asv_000242	asv_000249	asv_000176	asv_000186	asv_000112	asv_004501	asv_005631	asv_003667	asv_005673	asv_004755	asv_006395	asv_007070	asv_005424	asv_008907	asv_003889	asv_003475	asv_006972	asv_003668	asv_005368	asv_002995	asv_000314	asv_000822	asv_000540	asv_000872	asv_000709
HAV_2281	HAV_2281_S83_R1_001.fastq.gz	Y2018	Check_B37xMo17			HN	N	sp1	spb1	1013	1	0	13	rep1	18	25	12	14	9	14	18	10	11	39	41	53	13	8	12	0	0	0	0	0	0	0	0	0	0	0	0	0	0	0	56	49	57	49	36
HAV_2282	HAV_2282_S91_R1_001.fastq.gz	Y2018	CML228	Ames 27088	ts	HN	N	sp1	spb1	1015	1	0	15	rep1	33	43	36	26	15	25	32	23	23	3	3	1	30	20	27	0	0	0	0	0	0	0	0	0	0	0	0	0	0	0	0	0	0	0	0
HAV_2283	HAV_2283_S99_R1_001.fastq.gz	Y2018	CML228	Ames 27088	ts	HN	N	sp1	spb1	1016	1	0	16	rep2	125	156	73	76	48	127	134	75	79	7	16	13	83	61	81	0	0	0	0	0	0	0	0	0	0	0	0	0	0	0	37	33	45	31	30
HAV_2284	HAV_2284_S107_R1_001.fastq.gz	Y2018	Check_B37xMo17			HN	N	sp1	spb2	1026	1	0	26	rep1	24	46	17	21	16	17	24	12	13	1	6	3	15	22	18	0	0	0	0	0	0	0	0	0	0	0	0	0	0	0	0	0	0	0	0
HAV_2285	HAV_2285_S115_R1_001.fastq.gz	Y2018	Check_B37xMo17			HN	N	sp1	spb3	1047	1	0	47	rep1	112	126	63	68	32	80	101	60	68	24	18	33	68	54	62	0	0	0	0	0	0	0	0	0	0	0	0	0	0	0	19	12	25	19	19
HAV_2286	HAV_2286_S123_R1_001.fastq.gz	Y2018	Check_B73xMo17			HN	N	sp2	spb2	1066	1	0	66	rep1	0	25	0	15	11	17	21	16	19	0	0	0	16	34	15	20	13	0	0	0	0	42	0	0	0	12	0	0	0	2	0	0	0	0	0
HAV_2287	HAV_2287_S68_R1_001.fastq.gz	Y2018	Check_B37xMo17			HN	N	sp2	spb2	1069	1	0	69	rep1	27	27	13	9	9	20	25	8	16	9	10	16	22	17	19	0	0	0	0	0	0	0	0	0	0	0	0	0	0	0	101	61	124	100	101
HAV_2288	HAV_2288_S76_R1_001.fastq.gz	Y2018	Check_B73xMo17			HN	N	sp1	spb1	1109	1	1	09	rep1	12	22	10	7	11	11	20	7	8	12	9	10	13	10	11	0	0	0	0	0	0	0	0	0	0	0	0	0	0	0	0	0	0	0	34
HAV_2289	HAV_2289_S84_R1_001.fastq.gz	Y2018	CML69	Ames 28184	ts	HN	N	sp1	spb2	1127	1	1	27	rep1	19	26	11	15	9	15	21	12	15	0	3	5	11	13	11	0	0	0	0	0	0	0	0	0	0	0	0	0	0	0	25	32	36	35	36
HAV_2290	HAV_2290_S92_R1_001.fastq.gz	Y2018	CML69	Ames 28184	ts	HN	N	sp1	spb2	1128	1	1	28	rep2	0	0	0	12	0	0	0	0	0	0	0	0	39	0	38	0	0	0	0	0	0	0	0	0	0	0	0	0	0	0	0	0	0	0	0
HAV_2291	HAV_2291_S100_R1_001.fastq.gz	Y2018	Check_B73xMo17			HN	N	sp1	spb2	1130	1	1	30	rep1	19	46	22	20	15	34	25	22	22	0	0	0	26	14	26	0	0	0	0	0	0	0	0	0	0	0	0	0	0	0	0	0	22	0	47
HAV_2292	HAV_2292_S108_R1_001.fastq.gz	Y2018	T232	PI 550522	mixed	HN	N	sp1	spb3	1133	1	1	33	rep1	40	38	7	21	13	20	32	11	24	24	22	23	21	9	28	0	0	0	0	0	0	0	0	0	0	0	0	0	0	0	41	0	0	0	0
HAV_2293	HAV_2293_S116_R1_001.fastq.gz	Y2018	T232	PI 550522	mixed	HN	N	sp1	spb3	1134	1	1	34	rep2	42	50	26	30	18	21	39	19	26	15	17	25	21	26	27	0	0	0	0	0	0	0	0	0	0	0	0	0	0	0	0	0	0	0	0
HAV_2294	HAV_2294_S124_R1_001.fastq.gz	Y2018	TZI8	PI 506246	ts	HN	N	sp1	spb3	1135	1	1	35	rep1	45	80	22	31	35	27	69	12	39	35	29	46	28	19	41	0	0	0	0	0	0	0	0	0	0	0	0	0	0	0	46	0	0	0	13
HAV_2295	HAV_2295_S69_R1_001.fastq.gz	Y2018	TZI8	PI 506246	ts	HN	N	sp1	spb3	1136	1	1	36	rep2	75	114	47	63	37	54	64	36	45	53	62	83	61	49	50	18	21	19	12	18	12	22	20	15	10	17	6	29	18	18	48	0	41	30	46
HAV_2296	HAV_2296_S77_R1_001.fastq.gz	Y2018	MS71	PI 587137	nss	HN	N	sp1	spb3	1143	1	1	43	rep1	70	110	55	59	46	51	88	51	57	19	19	25	65	50	60	0	0	0	0	0	0	0	0	0	0	0	0	0	0	0	14	0	12	15	0
HAV_2297	HAV_2297_S85_R1_001.fastq.gz	Y2018	MS71	PI 587137	nss	HN	N	sp1	spb3	1144	1	1	44	rep2	36	40	27	27	10	17	32	12	19	15	23	27	23	13	19	0	0	0	0	0	0	0	0	0	0	0	0	0	0	0	0	0	0	0	0
HAV_2298	HAV_2298_S93_R1_001.fastq.gz	Y2018	Check_B73xMo17			HN	N	sp2	spb1	1164	1	1	64	rep1	45	68	27	41	18	35	43	18	33	3	6	5	39	28	44	10	8	0	0	0	0	0	0	0	0	0	0	0	0	0	16	0	0	17	0
HAV_2299	HAV_2299_S101_R1_001.fastq.gz	Y2018	SD44	PI 524969	nss	HN	N	sp2	spb3	1183	1	1	83	rep1	34	38	18	19	12	23	36	15	21	3	1	3	23	14	21	11	9	0	0	0	0	0	0	0	0	0	0	6	0	0	0	0	0	0	40
HAV_2300	HAV_2300_S109_R1_001.fastq.gz	Y2018	SD44	PI 524969	nss	HN	N	sp2	spb3	1184	1	1	84	rep2	45	42	21	21	19	24	29	22	23	0	0	0	28	10	24	0	0	0	9	0	0	0	0	0	0	0	0	10	0	0	0	31	17	0	28
HAV_2301	HAV_2301_S117_R1_001.fastq.gz	Y2018	Check_B37xMo17			HN	N	sp2	spb3	1186	1	1	86	rep1	37	51	34	32	17	40	35	13	27	6	8	8	25	18	17	0	0	0	0	0	0	0	0	0	0	0	0	0	0	0	0	0	0	0	0
HAV_2302	HAV_2302_S125_R1_001.fastq.gz	Y2018	Check_B73xMo17			HN	N	sp2	spb3	1190	1	1	90	rep1	54	70	48	57	30	56	63	30	39	19	9	16	45	29	50	0	0	0	0	0	0	0	0	0	0	0	0	0	0	0	107	69	139	80	109
HAV_2303	HAV_2303_S70_R1_001.fastq.gz	Y2018	CML333	Ames 27101	ts	HN	N	sp1	spb1	1201	1	2	01	rep1	0	8	0	3	0	14	12	8	3	5	10	7	5	0	15	0	0	0	0	0	0	0	0	0	0	0	0	0	0	0	0	0	0	0	0
HAV_2304	HAV_2304_S78_R1_001.fastq.gz	Y2018	CML333	Ames 27101	ts	HN	N	sp1	spb1	1202	1	2	02	rep2	16	24	13	20	14	16	16	17	6	3	4	2	9	5	6	0	0	0	0	0	0	0	0	0	0	0	0	0	0	0	0	0	0	0	0
HAV_2305	HAV_2305_S86_R1_001.fastq.gz	Y2018	CML277	PI 595550	ts	HN	N	sp1	spb1	1207	1	2	07	rep1	34	50	29	33	18	33	38	22	23	28	25	27	19	21	38	0	0	0	0	0	0	0	0	0	0	0	0	0	0	0	0	0	16	11	0
HAV_2306	HAV_2306_S94_R1_001.fastq.gz	Y2018	CML277	PI 595550	ts	HN	N	sp1	spb1	1208	1	2	08	rep2	31	39	18	25	8	21	26	17	12	58	50	59	14	11	20	0	0	0	0	0	0	0	0	0	0	0	0	0	0	0	23	15	26	16	24
HAV_2307	HAV_2307_S102_R1_001.fastq.gz	Y2018	CML52	PI 595561	ts	HN	N	sp1	spb2	1219	1	2	19	rep1	124	189	82	78	62	84	136	66	79	22	28	35	90	71	91	8	0	0	0	0	0	0	0	0	0	0	0	11	0	11	0	0	0	0	0
HAV_2308	HAV_2308_S110_R1_001.fastq.gz	Y2018	CML52	PI 595561	ts	HN	N	sp1	spb2	1220	1	2	20	rep2	73	99	49	51	32	39	58	42	40	0	0	0	55	33	41	0	0	0	0	0	0	0	0	0	0	0	0	0	0	0	0	0	0	0	0
HAV_2309	HAV_2309_S118_R1_001.fastq.gz	Y2018	Check_B73xMo17			HN	N	sp1	spb3	1243	1	2	43	rep1	27	48	18	27	16	30	40	21	22	12	8	11	20	15	21	0	0	0	0	0	0	0	0	0	0	0	0	0	0	0	0	0	0	0	0
HAV_2310	HAV_2310_S126_R1_001.fastq.gz	Y2018	A554	PI 587138	nss	HN	N	sp2	spb1	1249	1	2	49	rep1	54	81	27	34	23	38	63	26	36	18	25	36	31	21	21	0	7	0	0	0	0	0	0	0	0	0	0	0	0	0	0	0	0	0	0
HAV_2311	HAV_2311_S1_R1_001.fastq.gz	Y2018	A554	PI 587138	nss	HN	N	sp2	spb1	1250	1	2	50	rep2	57	54	33	36	17	36	52	25	27	6	10	10	33	36	27	0	0	0	0	0	0	0	0	0	0	0	0	0	0	0	0	0	0	0	0
HAV_2312	HAV_2312_S9_R1_001.fastq.gz	Y2018	B76	PI 550483	ss	HN	N	sp2	spb1	1261	1	2	61	rep1	57	91	39	47	27	50	72	42	34	7	10	13	48	37	47	0	0	0	0	0	0	0	0	0	0	0	0	0	0	0	0	0	0	67	0
HAV_2313	HAV_2313_S17_R1_001.fastq.gz	Y2018	B76	PI 550483	ss	HN	N	sp2	spb1	1262	1	2	62	rep2	0	73	0	65	0	0	0	0	43	0	0	0	0	0	0	0	0	0	0	0	0	0	0	0	0	0	0	0	0	0	40	34	0	48	29
HAV_2314	HAV_2314_S25_R1_001.fastq.gz	Y2018	Check_B37xMo17			HN	N	sp2	spb1	1263	1	2	63	rep1	82	118	46	75	52	66	76	43	54	32	21	41	65	50	47	0	0	0	0	0	0	0	0	0	0	0	0	0	0	0	0	0	0	0	0
HAV_2315	HAV_2315_S33_R1_001.fastq.gz	Y2018	MT42	Ames 20140	mixed	HN	N	sp2	spb2	1269	1	2	69	rep1	38	60	18	26	14	22	51	30	22	11	6	10	25	18	30	0	0	0	0	0	0	0	0	0	0	0	0	0	0	0	0	0	0	0	0
HAV_2316	HAV_2316_S41_R1_001.fastq.gz	Y2018	MT42	Ames 20140	mixed	HN	N	sp2	spb2	1270	1	2	70	rep2	0	113	0	28	0	0	0	18	0	0	23	0	0	0	0	0	0	0	0	0	0	0	0	0	0	0	0	0	0	0	0	0	0	0	0
HAV_2317	HAV_2317_S49_R1_001.fastq.gz	Y2018	OH43	Ames 19288	nss	HN	N	sp2	spb3	1287	1	2	87	rep1	34	46	22	21	10	21	23	13	13	19	15	19	28	11	19	0	0	0	0	0	0	0	0	0	0	0	0	0	0	0	0	0	0	0	0
HAV_2318	HAV_2318_S57_R1_001.fastq.gz	Y2018	OH43	Ames 19288	nss	HN	N	sp2	spb3	1288	1	2	88	rep2	35	46	23	16	11	18	32	15	18	27	31	44	25	18	15	0	0	0	0	0	0	0	0	0	0	0	0	0	0	0	0	0	0	0	0
HAV_2319	HAV_2319_S2_R1_001.fastq.gz	Y2018	B73	PI 550473	ss	HN	N	sp3	spb1	1305	1	3	05	rep1	19	31	6	11	8	10	14	10	11	38	24	29	10	9	15	0	0	0	0	0	0	0	0	0	0	0	0	0	0	0	109	0	0	0	0
HAV_2320	HAV_2320_S10_R1_001.fastq.gz	Y2018	B73	PI 550473	ss	HN	N	sp3	spb1	1306	1	3	06	rep2	51	58	31	30	24	50	56	34	32	4	5	0	41	21	35	0	0	0	0	0	0	0	0	0	0	0	0	0	0	0	0	0	0	0	0
HAV_2321	HAV_2321_S18_R1_001.fastq.gz	Y2018	CML103	Ames 27081	ts	HN	N	sp3	spb2	1327	1	3	27	rep1	0	0	0	9	0	0	38	10	0	0	6	8	14	40	0	0	0	0	0	0	0	0	0	0	0	0	0	0	0	0	0	0	0	0	0
HAV_2322	HAV_2322_S26_R1_001.fastq.gz	Y2018	CML103	Ames 27081	ts	HN	N	sp3	spb2	1328	1	3	28	rep2	66	70	47	46	24	44	50	23	26	20	24	12	41	26	42	0	0	0	0	0	0	0	0	0	0	0	0	0	0	0	34	0	0	0	0
HAV_2323	HAV_2323_S34_R1_001.fastq.gz	Y2018	Check_B37xMo17			HN	N	sp3	spb2	1332	1	3	32	rep1	29	34	15	24	11	13	28	12	28	50	32	39	14	15	29	0	0	0	0	0	0	0	0	0	0	0	0	0	0	0	68	0	35	0	69
HAV_2324	HAV_2324_S42_R1_001.fastq.gz	Y2018	Check_B73xMo17			HN	N	sp3	spb3	1335	1	3	35	rep1	0	30	0	2	5	7	1	0	0	0	0	24	12	0	5	0	0	0	0	0	0	0	0	0	0	0	0	0	0	0	0	0	0	0	0
HAV_2325	HAV_2325_S50_R1_001.fastq.gz	Y2018	Check_B37xMo17			HN	N	sp3	spb3	1341	1	3	41	rep1	50	73	23	32	29	45	47	23	27	78	76	99	40	19	36	0	0	0	0	0	0	0	0	0	0	0	0	0	0	0	0	0	0	0	0
HAV_2326	HAV_2326_S58_R1_001.fastq.gz	Y2018	Check_B73xMo17			HN	N	sp4	spb1	1364	1	3	64	rep1	25	38	19	13	19	18	38	19	25	18	28	32	28	25	20	0	0	0	0	0	0	0	0	0	0	0	0	0	0	0	0	0	0	0	0
HAV_2327	HAV_2327_S3_R1_001.fastq.gz	Y2018	NC350	Ames 27171	ts	HN	N	sp4	spb2	1369	1	3	69	rep1	22	32	8	15	10	27	21	11	19	63	73	76	22	10	14	20	17	0	0	0	0	0	0	0	0	16	10	19	0	0	0	0	0	0	0
HAV_2328	HAV_2328_S11_R1_001.fastq.gz	Y2018	NC350	Ames 27171	ts	HN	N	sp4	spb2	1370	1	3	70	rep2	74	83	50	42	16	50	57	35	30	27	33	45	56	38	43	0	0	0	0	0	0	0	0	0	0	0	0	0	0	0	0	0	0	0	0
HAV_2329	HAV_2329_S19_R1_001.fastq.gz	Y2018	Check_B37xMo17			HN	N	sp4	spb2	1372	1	3	72	rep1	83	99	48	44	28	46	56	30	36	4	5	2	48	41	45	0	0	0	0	0	0	0	0	0	0	0	0	0	0	0	30	0	21	0	70
HAV_2330	HAV_2330_S27_R1_001.fastq.gz	Y2018	VA102	PI 587151	nss	HN	N	sp4	spb3	1383	1	3	83	rep1	128	185	80	75	28	102	127	76	68	32	27	29	75	64	71	0	0	0	0	0	0	0	0	0	0	0	0	0	0	0	0	0	0	0	0
HAV_2331	HAV_2331_S35_R1_001.fastq.gz	Y2018	VA102	PI 587151	nss	HN	N	sp4	spb3	1384	1	3	84	rep2	44	44	21	24	19	27	33	25	26	1	4	4	25	20	24	0	0	0	0	0	0	0	0	0	0	0	0	0	0	0	0	0	0	0	0
HAV_2332	HAV_2332_S43_R1_001.fastq.gz	Y2018	OH603	PI 573098	mixed	HN	N	sp4	spb3	1389	1	3	89	rep1	24	33	18	20	13	14	33	8	11	4	15	18	21	14	14	0	0	0	0	0	0	0	0	0	0	0	0	0	0	0	0	0	0	0	45
HAV_2333	HAV_2333_S51_R1_001.fastq.gz	Y2018	OH603	PI 573098	mixed	HN	N	sp4	spb3	1390	1	3	90	rep2	67	107	45	61	37	62	77	39	55	24	12	26	56	43	56	0	0	0	0	0	0	0	0	0	0	0	0	0	0	0	25	0	39	0	16
HAV_2334	HAV_2334_S59_R1_001.fastq.gz	Y2018	Check_B37xMo17			HN	N	sp4	spb3	1395	1	3	95	rep1	34	36	12	21	13	27	37	33	18	4	10	3	27	9	18	0	0	0	0	0	0	0	0	0	0	0	0	0	0	0	0	0	0	0	0
HAV_2335	HAV_2335_S4_R1_001.fastq.gz	Y2018	Check_B73xMo17			HN	N	sp3	spb1	1403	1	4	03	rep1	19	37	17	22	6	27	29	12	16	15	8	13	18	17	19	0	0	0	0	0	0	0	0	0	0	0	0	0	0	0	0	0	0	0	0
HAV_2336	HAV_2336_S12_R1_001.fastq.gz	Y2018	Check_B73xMo17			HN	N	sp3	spb2	1423	1	4	23	rep1	30	36	14	32	11	21	32	6	17	15	15	12	18	18	24	0	0	0	0	0	0	0	0	0	0	0	0	0	0	0	0	0	0	0	0
HAV_2337	HAV_2337_S20_R1_001.fastq.gz	Y2018	IL14H	Ames 27118	sweet	HN	N	sp3	spb2	1425	1	4	25	rep1	18	19	11	11	11	6	17	15	11	20	17	23	10	5	11	0	0	0	0	0	0	0	0	0	0	0	0	0	0	0	0	0	0	0	64
HAV_2338	HAV_2338_S28_R1_001.fastq.gz	Y2018	IL14H	Ames 27118	sweet	HN	N	sp3	spb2	1426	1	4	26	rep2	74	84	34	56	29	57	66	46	35	30	25	38	69	39	44	0	0	0	0	0	0	0	0	0	0	0	0	0	0	0	0	0	0	0	0
HAV_2339	HAV_2339_S36_R1_001.fastq.gz	Y2018	RTH3	roothairless3		HN	N	sp3	spb2	1427	1	4	27	rep1	85	121	51	67	42	69	76	43	48	26	21	25	66	61	57	0	0	0	0	0	0	0	0	0	0	0	0	0	0	0	27	23	39	28	31
HAV_2340	HAV_2340_S44_R1_001.fastq.gz	Y2018	RTH3	roothairless3		HN	N	sp3	spb2	1428	1	4	28	rep2	32	24	14	17	7	11	26	12	11	4	3	4	22	13	19	0	0	0	0	0	0	0	0	0	0	0	0	0	0	0	0	0	0	0	68
HAV_2341	HAV_2341_S52_R1_001.fastq.gz	Y2018	N28HT	Ames 27138	mixed	HN	N	sp4	spb2	1475	1	4	75	rep1	72	105	61	50	34	64	83	31	47	23	22	27	61	44	51	0	0	0	0	0	0	0	0	0	0	0	0	0	0	0	0	0	18	0	8
HAV_2342	HAV_2342_S60_R1_001.fastq.gz	Y2018	N28HT	Ames 27138	mixed	HN	N	sp4	spb2	1476	1	4	76	rep2	178	241	110	111	98	120	162	78	98	6	12	17	123	84	115	0	0	0	0	0	0	0	0	0	0	0	0	0	0	0	0	0	0	0	0
HAV_2343	HAV_2343_S5_R1_001.fastq.gz	Y2018	NC358	Ames 27175	ts	HN	N	sp4	spb3	1491	1	4	91	rep1	90	106	47	49	23	48	60	43	54	2	8	8	50	30	52	0	0	0	0	0	0	0	0	0	0	0	0	0	0	0	0	0	0	0	0
HAV_2344	HAV_2344_S13_R1_001.fastq.gz	Y2018	NC358	Ames 27175	ts	HN	N	sp4	spb3	1492	1	4	92	rep2	63	90	41	38	25	45	77	32	31	4	2	1	42	39	36	0	0	0	0	0	0	0	0	0	0	0	0	0	0	0	0	0	0	0	0
HAV_2345	HAV_2345_S21_R1_001.fastq.gz	Y2018	Check_B73xMo17			HN	N	sp4	spb3	1496	1	4	96	rep1	45	76	38	41	27	45	68	38	43	0	0	0	51	35	46	0	0	0	0	0	0	0	0	0	0	0	0	0	0	0	0	0	0	44	0
HAV_2346	HAV_2346_S29_R1_001.fastq.gz	Y2018	Check_B37xMo17			HN	N	sp3	spb1	1508	1	5	08	rep1	44	63	36	31	23	25	55	20	21	71	57	82	34	16	30	0	0	0	0	0	0	0	0	0	0	0	0	0	0	0	68	0	0	0	0
HAV_2347	HAV_2347_S37_R1_001.fastq.gz	Y2018	B97	PI 564682	nss	HN	N	sp3	spb1	1509	1	5	09	rep1	28	34	22	23	20	23	31	27	20	34	42	45	23	20	20	0	0	0	0	0	0	0	0	0	0	0	0	0	0	0	0	0	0	65	0
HAV_2348	HAV_2348_S45_R1_001.fastq.gz	Y2018	B97	PI 564682	nss	HN	N	sp3	spb1	1510	1	5	10	rep2	46	67	21	33	22	41	44	21	23	1	4	8	39	23	22	0	0	0	0	0	0	0	0	0	0	0	0	0	0	0	0	0	0	0	0
HAV_2349	HAV_2349_S53_R1_001.fastq.gz	Y2018	M37W	Ames 27133	mixed	HN	N	sp3	spb2	1527	1	5	27	rep1	31	36	24	31	25	31	37	12	30	6	6	7	14	26	29	0	0	0	0	0	0	0	0	0	0	0	0	0	0	0	0	0	0	0	0
HAV_2350	HAV_2350_S61_R1_001.fastq.gz	Y2018	M37W	Ames 27133	mixed	HN	N	sp3	spb2	1528	1	5	28	rep2	21	48	21	24	12	28	22	13	23	32	24	30	29	11	15	0	0	0	0	0	0	0	0	0	0	0	0	0	0	0	0	0	57	0	26
HAV_2351	HAV_2351_S6_R1_001.fastq.gz	Y2018	HP301	PI 587131	popcorn	HN	N	sp4	spb1	1551	1	5	51	rep1	122	125	50	65	36	80	107	44	49	23	21	29	82	50	77	0	0	0	0	0	0	0	0	0	0	0	0	0	0	0	0	0	0	0	0
HAV_2352	HAV_2352_S14_R1_001.fastq.gz	Y2018	HP301	PI 587131	popcorn	HN	N	sp4	spb1	1552	1	5	52	rep2	107	136	60	76	47	80	94	41	46	11	12	14	83	52	57	0	0	0	0	0	0	0	0	0	0	13	0	0	0	0	0	0	0	0	0
HAV_2353	HAV_2353_S22_R1_001.fastq.gz	Y2018	Check_B37xMo17			HN	N	sp4	spb1	1557	1	5	57	rep1	70	111	55	51	24	53	89	49	50	39	32	49	57	46	38	0	0	0	0	0	0	0	0	0	0	0	0	0	0	0	0	0	0	0	0
HAV_2354	HAV_2354_S30_R1_001.fastq.gz	Y2018	M162W	Ames 27134	nss	HN	N	sp4	spb2	1573	1	5	73	rep1	29	33	22	32	15	25	36	21	27	14	25	26	23	14	27	0	0	0	0	0	0	0	0	0	0	0	0	0	0	0	31	19	41	28	22
HAV_2355	HAV_2355_S38_R1_001.fastq.gz	Y2018	M162W	Ames 27134	nss	HN	N	sp4	spb2	1574	1	5	74	rep2	64	104	50	65	41	50	79	47	52	11	19	25	45	34	45	0	0	0	0	0	0	0	0	0	0	0	0	0	0	0	71	60	101	76	63
HAV_2356	HAV_2356_S46_R1_001.fastq.gz	Y2018	Check_B73xMo17			HN	N	sp4	spb2	1578	1	5	78	rep1	24	24	16	20	10	13	32	16	13	8	9	13	20	11	20	0	0	0	0	0	0	0	0	0	0	0	0	0	0	0	0	0	0	35	0
HAV_2357	HAV_2357_S54_R1_001.fastq.gz	Y2018	A554	PI 587138	nss	LN	N	sp1	spb1	2015	2	0	15	rep1	155	205	90	113	65	120	149	79	83	1	1	2	102	85	93	0	0	0	0	0	0	0	0	0	0	0	0	0	0	0	0	0	103	0	0
HAV_2358	HAV_2358_S62_R1_001.fastq.gz	Y2018	A554	PI 587138	nss	LN	N	sp1	spb1	2016	2	0	16	rep2	156	228	107	116	77	131	167	79	77	14	5	10	105	78	92	0	0	0	0	0	0	0	0	0	0	0	0	0	0	0	0	0	0	0	0
HAV_2359	HAV_2359_S7_R1_001.fastq.gz	Y2018	SD44	PI 524969	nss	LN	N	sp1	spb3	2043	2	0	43	rep1	30	0	9	19	18	62	51	0	46	0	0	0	15	0	0	0	0	0	0	0	0	0	0	0	0	0	0	0	0	0	0	0	0	0	0
HAV_2360	HAV_2360_S15_R1_001.fastq.gz	Y2018	SD44	PI 524969	nss	LN	N	sp1	spb3	2044	2	0	44	rep2	14	34	22	14	13	20	24	20	19	46	27	43	24	22	18	0	0	0	0	0	0	0	0	0	0	0	0	0	0	0	87	0	0	0	0
HAV_2361	HAV_2361_S23_R1_001.fastq.gz	Y2018	Check_B73xMo17			LN	N	sp2	spb1	2056	2	0	56	rep1	63	72	30	35	30	42	68	20	36	2	3	3	40	41	41	0	0	0	0	0	0	0	0	0	0	0	0	0	0	0	0	0	0	0	0
HAV_2362	HAV_2362_S31_R1_001.fastq.gz	Y2018	Check_B73xMo17			LN	N	sp2	spb2	2065	2	0	65	rep1	0	0	0	0	0	9	0	0	0	0	0	0	0	0	0	0	0	0	0	0	0	0	0	0	0	0	0	0	0	0	0	0	0	0	0
HAV_2363	HAV_2363_S39_R1_001.fastq.gz	Y2018	Check_B37xMo17			LN	N	sp2	spb3	2086	2	0	86	rep1	0	0	0	0	0	0	0	0	0	0	0	0	0	0	0	0	0	0	0	0	0	0	0	0	0	0	0	0	0	0	0	0	0	0	0
HAV_2364	HAV_2364_S47_R1_001.fastq.gz	Y2018	NC358	Ames 27175	ts	LN	N	sp2	spb3	2095	2	0	95	rep1	45	36	26	0	0	80	40	0	52	0	0	0	31	0	0	0	0	0	0	0	0	0	0	0	0	0	0	0	0	0	0	0	0	0	0
HAV_2365	HAV_2365_S55_R1_001.fastq.gz	Y2018	NC358	Ames 27175	ts	LN	N	sp2	spb3	2096	2	0	96	rep2	25	30	26	18	12	21	37	15	19	19	19	16	18	19	23	0	0	0	0	0	0	0	0	0	0	0	0	0	0	0	0	0	0	0	0
HAV_2366	HAV_2366_S63_R1_001.fastq.gz	Y2018	B76	PI 550483	ss	LN	N	sp1	spb1	2101	2	1	01	rep1	32	61	21	30	26	25	46	22	29	8	8	15	26	22	23	0	0	0	0	0	0	0	0	0	0	0	0	0	0	0	0	0	0	0	0
HAV_2367	HAV_2367_S8_R1_001.fastq.gz	Y2018	B76	PI 550483	ss	LN	N	sp1	spb1	2102	2	1	02	rep2	48	59	30	24	22	23	43	34	21	0	0	0	29	18	21	0	0	0	0	0	0	0	0	0	0	0	0	0	0	0	0	65	0	0	0
HAV_2368	HAV_2368_S16_R1_001.fastq.gz	Y2018	Check_B37xMo17			LN	N	sp1	spb1	2110	2	1	10	rep1	0	0	0	11	0	15	0	0	52	16	0	0	0	22	11	0	0	0	0	0	0	0	0	0	0	0	0	0	0	0	0	0	0	0	0
HAV_2369	HAV_2369_S24_R1_001.fastq.gz	Y2018	MT42	Ames 20140	mixed	LN	N	sp1	spb2	2125	2	1	25	rep1	59	78	39	44	31	37	60	34	42	7	3	7	49	25	48	0	0	0	0	0	0	0	0	0	0	0	0	0	0	0	0	0	0	0	0
HAV_2370	HAV_2370_S32_R1_001.fastq.gz	Y2018	MT42	Ames 20140	mixed	LN	N	sp1	spb2	2126	2	1	26	rep2	29	39	11	15	9	14	29	20	17	43	45	57	15	9	6	0	0	0	0	0	0	0	0	0	0	0	0	0	0	0	0	0	0	0	19
HAV_2371	HAV_2371_S40_R1_001.fastq.gz	Y2018	Check_B37xMo17			LN	N	sp1	spb2	2127	2	1	27	rep1	26	40	21	26	12	21	29	13	17	15	18	30	26	14	18	0	0	0	0	0	0	0	0	0	0	0	0	0	0	0	0	0	0	0	0
HAV_2373	HAV_2373_S56_R1_001.fastq.gz	Y2018	OH43	Ames 19288	nss	LN	N	sp1	spb3	2144	2	1	44	rep2	16	18	10	8	5	10	12	7	11	133	121	163	10	6	12	0	0	0	0	0	0	0	0	0	0	0	0	0	0	0	0	0	0	0	0
HAV_2374	HAV_2374_S64_R1_001.fastq.gz	Y2018	HP301	PI 587131	popcorn	LN	N	sp2	spb1	2157	2	1	57	rep1	98	128	59	67	40	67	107	52	58	39	36	40	65	47	74	0	0	0	0	0	0	0	0	0	0	0	0	0	0	0	0	0	0	0	0
HAV_2375	HAV_2375_S65_R1_001.fastq.gz	Y2018	HP301	PI 587131	popcorn	LN	N	sp2	spb1	2158	2	1	58	rep2	110	145	71	77	41	83	123	42	45	4	1	9	71	67	63	0	0	0	0	0	0	0	0	0	0	0	0	0	0	0	102	0	0	0	0
HAV_2376	HAV_2376_S73_R1_001.fastq.gz	Y2018	N28HT	Ames 27138	mixed	LN	N	sp2	spb2	2175	2	1	75	rep1	33	44	24	33	15	27	48	25	23	19	18	21	21	16	25	0	0	0	0	0	0	0	0	0	0	0	0	0	0	0	0	0	0	0	0
HAV_2377	HAV_2377_S81_R1_001.fastq.gz	Y2018	N28HT	Ames 27138	mixed	LN	N	sp2	spb2	2176	2	1	76	rep2	103	118	60	93	50	67	98	46	50	10	10	15	61	49	54	0	0	0	0	0	0	0	0	0	0	0	0	0	0	0	0	0	0	0	0
HAV_2378	HAV_2378_S89_R1_001.fastq.gz	Y2018	Check_B37xMo17			LN	N	sp2	spb2	2178	2	1	78	rep1	58	127	46	44	45	62	70	42	54	0	0	0	51	44	61	0	0	0	0	0	0	0	0	0	0	0	0	0	0	0	0	0	0	0	0
HAV_2379	HAV_2379_S97_R1_001.fastq.gz	Y2018	VA102	PI 587151	nss	LN	N	sp2	spb3	2189	2	1	89	rep1	34	7	12	0	16	14	38	12	8	15	18	11	16	9	13	0	0	0	0	0	0	0	0	0	0	0	0	0	0	0	0	0	0	0	0
HAV_2380	HAV_2380_S105_R1_001.fastq.gz	Y2018	VA102	PI 587151	nss	LN	N	sp2	spb3	2190	2	1	90	rep2	0	0	0	0	0	0	0	0	0	0	0	43	0	0	0	0	0	0	0	0	0	0	0	0	0	0	0	0	0	0	0	0	0	0	0
HAV_2381	HAV_2381_S113_R1_001.fastq.gz	Y2018	Check_B73xMo17			LN	N	sp1	spb1	2212	2	2	12	rep1	30	36	11	23	0	19	37	12	13	9	6	14	39	8	19	0	0	0	0	0	0	0	0	0	0	0	0	0	0	0	0	0	0	0	0
HAV_2382	HAV_2382_S121_R1_001.fastq.gz	Y2018	Check_B73xMo17			LN	N	sp1	spb2	2223	2	2	23	rep1	49	92	43	49	14	53	49	30	27	24	27	29	33	32	43	0	0	0	0	0	0	0	0	0	0	0	0	0	0	0	0	0	0	0	0
HAV_2383	HAV_2383_S66_R1_001.fastq.gz	Y2018	Check_B37xMo17			LN	N	sp1	spb3	2234	2	2	34	rep1	55	53	25	44	13	47	36	29	23	22	20	17	35	22	18	0	0	0	0	0	0	0	0	0	0	0	0	0	0	0	0	0	0	0	0
HAV_2384	HAV_2384_S74_R1_001.fastq.gz	Y2018	Check_B73xMo17			LN	N	sp1	spb3	2246	2	2	46	rep1	69	96	40	41	32	37	64	29	41	20	28	32	44	33	31	0	0	0	0	0	0	0	0	0	0	0	0	0	0	0	72	0	0	0	0
HAV_2385	HAV_2385_S82_R1_001.fastq.gz	Y2018	Check_B37xMo17			LN	N	sp2	spb1	2253	2	2	53	rep1	17	30	12	17	14	15	18	16	17	15	10	26	14	14	17	0	0	0	0	0	0	0	0	0	0	0	0	0	0	0	0	0	62	0	0
HAV_2386	HAV_2386_S90_R1_001.fastq.gz	Y2018	M162W	Ames 27134	nss	LN	N	sp2	spb2	2267	2	2	67	rep1	24	37	12	12	7	22	25	16	11	46	43	56	15	10	19	0	0	0	0	0	0	0	0	0	0	0	0	0	0	0	0	0	0	0	0
HAV_2387	HAV_2387_S98_R1_001.fastq.gz	Y2018	M162W	Ames 27134	nss	LN	N	sp2	spb2	2268	2	2	68	rep2	6	13	8	8	6	6	12	2	6	26	24	29	8	7	7	0	0	0	0	0	0	0	0	0	0	0	0	0	0	0	0	0	0	0	0
HAV_2388	HAV_2388_S106_R1_001.fastq.gz	Y2018	NC350	Ames 27171	ts	LN	N	sp2	spb2	2269	2	2	69	rep1	35	43	30	48	14	24	34	21	10	2	6	3	29	19	25	0	0	0	0	0	0	0	0	0	0	0	0	0	0	0	0	0	0	0	37
HAV_2389	HAV_2389_S114_R1_001.fastq.gz	Y2018	NC350	Ames 27171	ts	LN	N	sp2	spb2	2270	2	2	70	rep2	33	29	14	27	17	19	22	17	11	2	2	1	15	15	18	0	0	0	0	0	0	0	0	0	0	0	0	0	0	0	0	0	31	0	0
HAV_2390	HAV_2390_S122_R1_001.fastq.gz	Y2018	Check_B73xMo17			LN	N	sp2	spb3	2288	2	2	88	rep1	44	50	30	27	19	33	27	26	28	0	0	0	29	26	33	0	0	0	0	0	0	0	0	0	0	0	0	0	0	0	0	0	0	0	0
HAV_2391	HAV_2391_S67_R1_001.fastq.gz	Y2018	OH603	PI 573098	mixed	LN	N	sp2	spb3	2293	2	2	93	rep1	33	76	21	24	20	38	41	39	26	0	0	0	34	31	32	0	0	0	0	0	0	0	0	0	0	0	0	0	0	0	39	0	0	0	12
HAV_2392	HAV_2392_S75_R1_001.fastq.gz	Y2018	OH603	PI 573098	mixed	LN	N	sp2	spb3	2294	2	2	94	rep2	22	40	18	15	17	26	24	28	17	6	12	14	20	24	19	0	0	0	0	0	0	0	0	0	0	0	0	0	0	0	35	30	32	28	38
HAV_2393	HAV_2393_S83_R1_001.fastq.gz	Y2018	Check_B73xMo17			LN	N	sp3	spb1	2313	2	3	13	rep1	28	39	30	24	9	23	35	15	19	24	20	36	23	16	27	0	0	0	0	0	0	0	0	0	0	0	0	0	0	0	0	0	0	0	0
HAV_2394	HAV_2394_S91_R1_001.fastq.gz	Y2018	CML333	Ames 27101	ts	LN	N	sp3	spb1	2315	2	3	15	rep1	43	41	22	22	12	16	42	20	10	25	14	16	22	28	15	0	0	0	0	0	0	0	0	0	0	0	0	0	0	0	0	0	0	0	0
HAV_2395	HAV_2395_S99_R1_001.fastq.gz	Y2018	CML333	Ames 27101	ts	LN	N	sp3	spb1	2316	2	3	16	rep2	82	99	38	42	31	41	55	35	44	28	22	34	42	36	36	0	0	0	0	0	0	0	0	0	0	0	0	0	0	0	0	0	0	0	0
HAV_2396	HAV_2396_S107_R1_001.fastq.gz	Y2018	Check_B73xMo17			LN	N	sp3	spb3	2333	2	3	33	rep1	11	15	6	6	0	4	2	7	0	0	6	16	5	0	4	0	0	0	0	0	0	0	0	0	0	0	0	0	0	0	0	0	0	0	0
HAV_2397	HAV_2397_S115_R1_001.fastq.gz	Y2018	MS71	PI 587137	nss	LN	N	sp3	spb3	2347	2	3	47	rep1	68	99	50	61	28	80	83	45	41	17	19	27	51	48	61	0	0	0	0	0	0	0	0	0	0	0	0	0	0	0	27	29	45	25	24
HAV_2398	HAV_2398_S123_R1_001.fastq.gz	Y2018	MS71	PI 587137	nss	LN	N	sp3	spb3	2348	2	3	48	rep2	56	97	28	39	27	58	61	44	49	82	68	89	59	39	44	0	0	0	0	0	0	0	0	0	0	0	0	0	0	0	33	0	36	0	24
HAV_2399	HAV_2399_S68_R1_001.fastq.gz	Y2018	B73	PI 550473	ss	LN	N	sp4	spb1	2349	2	3	49	rep1	93	132	70	71	40	70	96	50	61	61	47	80	47	49	78	0	0	0	0	0	0	0	0	0	0	0	0	0	0	0	0	0	0	0	0
HAV_2400	HAV_2400_S76_R1_001.fastq.gz	Y2018	B73	PI 550473	ss	LN	N	sp4	spb1	2350	2	3	50	rep2	87	118	51	65	38	60	73	36	42	52	55	59	75	42	61	0	0	0	0	0	0	0	0	0	0	0	0	0	0	0	0	0	45	0	0
HAV_2401	HAV_2401_S84_R1_001.fastq.gz	Y2018	M37W	Ames 27133	mixed	LN	N	sp4	spb2	2367	2	3	67	rep1	44	45	32	30	17	49	41	20	24	9	10	8	31	26	28	0	0	0	0	0	0	0	0	0	0	0	0	0	0	0	39	0	23	38	0
HAV_2402	HAV_2402_S92_R1_001.fastq.gz	Y2018	M37W	Ames 27133	mixed	LN	N	sp4	spb2	2368	2	3	68	rep2	61	82	51	56	32	43	71	30	50	0	0	0	42	30	35	0	0	0	0	0	0	0	0	0	0	0	0	0	0	0	0	0	0	0	0
HAV_2403	HAV_2403_S100_R1_001.fastq.gz	Y2018	IL14H	Ames 27118	sweet	LN	N	sp4	spb2	2369	2	3	69	rep1	40	50	25	27	23	19	37	16	15	3	4	9	24	18	25	0	0	0	0	0	0	0	0	0	0	0	0	0	0	0	0	0	0	50	0
HAV_2404	HAV_2404_S108_R1_001.fastq.gz	Y2018	IL14H	Ames 27118	sweet	LN	N	sp4	spb2	2370	2	3	70	rep2	28	21	14	20	0	23	21	0	9	4	0	5	23	0	22	0	0	0	0	0	0	0	0	0	0	0	0	0	0	0	40	32	44	40	53
HAV_2405	HAV_2405_S116_R1_001.fastq.gz	Y2018	CML52	PI 595561	ts	LN	N	sp3	spb2	2417	2	4	17	rep1	116	172	52	62	41	100	123	59	76	18	8	20	79	63	83	0	0	0	0	0	0	0	0	0	0	0	0	0	0	0	17	0	35	24	14
HAV_2406	HAV_2406_S124_R1_001.fastq.gz	Y2018	CML52	PI 595561	ts	LN	N	sp3	spb2	2418	2	4	18	rep2	31	37	20	18	13	27	32	18	15	14	16	11	17	21	27	0	0	0	0	0	0	0	0	0	0	0	0	0	0	0	73	43	79	52	54
HAV_2407	HAV_2407_S69_R1_001.fastq.gz	Y2018	Check_B37xMo17			LN	N	sp3	spb2	2427	2	4	27	rep1	18	17	14	0	25	13	22	13	8	2	7	2	10	8	6	0	0	0	0	0	0	0	0	0	0	0	0	0	0	0	23	0	25	32	19
HAV_2408	HAV_2408_S77_R1_001.fastq.gz	Y2018	TZI8	PI 506246	ts	LN	N	sp3	spb3	2437	2	4	37	rep1	23	41	20	27	9	20	19	16	11	22	9	12	24	16	14	0	0	0	0	0	0	0	0	0	0	0	0	0	0	0	0	0	0	0	0
HAV_2409	HAV_2409_S85_R1_001.fastq.gz	Y2018	TZI8	PI 506246	ts	LN	N	sp3	spb3	2438	2	4	38	rep2	76	97	46	43	33	52	66	35	31	27	32	27	48	27	48	0	0	0	0	0	0	0	0	0	0	0	0	0	0	0	55	28	46	41	42
HAV_2410	HAV_2410_S93_R1_001.fastq.gz	Y2018	Check_B37xMo17			LN	N	sp3	spb3	2446	2	4	46	rep1	94	123	61	48	33	68	89	38	39	0	0	0	68	48	38	0	0	0	0	0	0	0	0	0	0	0	0	0	0	0	0	0	0	0	0
HAV_2411	HAV_2411_S101_R1_001.fastq.gz	Y2018	B97	PI 564682	nss	LN	N	sp4	spb1	2461	2	4	61	rep1	47	62	30	31	15	45	40	29	18	0	0	0	30	21	32	0	0	0	0	0	0	0	0	0	0	0	0	0	0	0	0	0	0	0	0
HAV_2412	HAV_2412_S109_R1_001.fastq.gz	Y2018	B97	PI 564682	nss	LN	N	sp4	spb1	2462	2	4	62	rep2	26	38	24	20	10	14	29	15	17	81	78	112	21	20	20	0	0	0	0	0	0	0	0	0	0	0	0	0	0	0	0	0	0	0	0
HAV_2413	HAV_2413_S117_R1_001.fastq.gz	Y2018	RTH3	roothairless3		LN	N	sp4	spb1	2463	2	4	63	rep1	103	136	56	51	29	68	71	52	55	27	29	35	56	41	65	0	0	0	0	0	0	0	0	0	0	0	0	0	0	0	0	0	0	0	0
HAV_2414	HAV_2414_S125_R1_001.fastq.gz	Y2018	RTH3	roothairless3		LN	N	sp4	spb1	2464	2	4	64	rep2	69	92	27	49	27	57	65	21	37	31	19	34	56	41	47	0	0	0	0	0	0	0	0	0	0	0	0	0	0	0	18	13	24	19	31
HAV_2415	HAV_2415_S70_R1_001.fastq.gz	Y2018	Check_B37xMo17			LN	N	sp4	spb2	2465	2	4	65	rep1	184	221	111	139	101	125	163	79	145	3	9	9	131	106	110	0	0	0	0	0	0	0	0	0	0	0	0	0	0	0	0	0	0	0	0
HAV_2416	HAV_2416_S78_R1_001.fastq.gz	Y2018	CML103	Ames 27081	ts	LN	N	sp4	spb2	2473	2	4	73	rep1	32	40	20	19	13	32	25	17	13	55	51	62	21	12	16	0	0	0	0	0	0	0	0	0	0	0	0	0	0	0	0	0	0	0	0
HAV_2417	HAV_2417_S86_R1_001.fastq.gz	Y2018	CML103	Ames 27081	ts	LN	N	sp4	spb2	2474	2	4	74	rep2	23	38	24	20	0	35	19	22	41	0	0	0	36	38	22	0	0	0	0	0	0	0	0	0	0	0	0	0	0	0	0	0	0	0	0
HAV_2418	HAV_2418_S94_R1_001.fastq.gz	Y2018	Check_B37xMo17			LN	N	sp4	spb3	2492	2	4	92	rep1	0	28	0	0	0	14	0	0	0	0	0	14	5	0	0	0	0	0	0	0	0	0	0	0	0	0	0	0	0	0	0	0	0	0	0
HAV_2419	HAV_2419_S102_R1_001.fastq.gz	Y2018	Check_B37xMo17			LN	N	sp3	spb1	2502	2	5	02	rep1	0	36	0	21	0	25	13	0	11	10	0	9	11	13	32	0	0	0	0	0	0	0	0	0	0	0	0	0	0	0	0	0	0	36	0
HAV_2420	HAV_2420_S110_R1_001.fastq.gz	Y2018	CML277	PI 595550	ts	LN	N	sp3	spb1	2513	2	5	13	rep1	0	146	0	0	0	40	0	0	0	0	0	0	0	0	0	0	0	0	0	0	0	0	0	0	0	0	0	0	0	0	0	0	79	0	0
HAV_2421	HAV_2421_S118_R1_001.fastq.gz	Y2018	CML277	PI 595550	ts	LN	N	sp3	spb1	2514	2	5	14	rep2	69	67	37	41	20	39	59	27	35	91	78	117	43	39	44	0	0	0	0	0	0	0	0	0	0	0	0	0	0	0	0	0	0	0	0
HAV_2422	HAV_2422_S126_R1_001.fastq.gz	Y2018	CML228	Ames 27088	ts	LN	N	sp3	spb1	2515	2	5	15	rep1	23	39	15	15	10	31	36	24	18	14	18	9	27	17	22	0	0	0	0	0	0	0	0	0	0	0	0	0	0	0	0	0	0	0	0
HAV_2423	HAV_2423_S71_R1_001.fastq.gz	Y2018	CML228	Ames 27088	ts	LN	N	sp3	spb1	2516	2	5	16	rep2	17	18	4	9	0	13	13	20	8	10	15	12	6	9	13	0	8	0	0	0	0	43	0	0	0	0	0	0	0	0	0	0	0	0	0
HAV_2424	HAV_2424_S79_R1_001.fastq.gz	Y2018	CML69	Ames 28184	ts	LN	N	sp3	spb2	2519	2	5	19	rep1	33	21	18	20	8	0	11	0	0	0	0	8	21	0	9	0	0	0	0	0	0	0	0	0	0	0	0	0	0	0	0	0	0	0	0
HAV_2425	HAV_2425_S87_R1_001.fastq.gz	Y2018	CML69	Ames 28184	ts	LN	N	sp3	spb2	2520	2	5	20	rep2	4	14	6	2	3	6	3	8	4	12	15	20	4	6	6	0	0	0	0	0	0	0	0	0	0	0	0	0	0	0	0	0	0	0	0
HAV_2426	HAV_2426_S95_R1_001.fastq.gz	Y2018	Check_B73xMo17			LN	N	sp3	spb2	2523	2	5	23	rep1	103	133	67	84	52	67	115	58	62	27	30	36	77	80	61	16	12	10	9	0	0	0	0	11	0	0	0	10	0	15	0	0	0	0	0
HAV_2427	HAV_2427_S103_R1_001.fastq.gz	Y2018	T232	PI 550522	mixed	LN	N	sp3	spb3	2541	2	5	41	rep1	91	111	45	60	38	75	83	43	60	15	23	23	72	40	64	0	0	0	0	0	0	0	0	0	0	0	0	0	0	0	49	0	28	33	0
HAV_2428	HAV_2428_S111_R1_001.fastq.gz	Y2018	T232	PI 550522	mixed	LN	N	sp3	spb3	2542	2	5	42	rep2	28	68	12	18	18	18	26	0	0	0	0	0	46	0	0	0	0	0	0	0	0	0	0	0	0	0	0	0	0	0	0	0	0	0	0
HAV_2429	HAV_2429_S119_R1_001.fastq.gz	Y2018	Check_B73xMo17			LN	N	sp4	spb1	2558	2	5	58	rep1	45	60	19	35	19	30	39	26	13	0	0	0	24	28	17	0	0	0	0	0	0	0	0	0	0	0	0	0	0	0	0	0	0	0	0
HAV_2430	HAV_2430_S127_R1_001.fastq.gz	Y2018	Check_B37xMo17			LN	N	sp4	spb1	2561	2	5	61	rep1	74	93	45	60	30	59	68	37	47	65	47	57	54	41	44	0	0	0	0	0	0	0	0	0	0	0	0	0	0	0	0	0	0	0	0
HAV_2431	HAV_2431_S72_R1_001.fastq.gz	Y2018	Check_B73xMo17			LN	N	sp4	spb2	2580	2	5	80	rep1	42	64	20	24	19	29	36	27	18	3	5	1	24	17	29	0	0	0	0	0	0	0	0	0	0	0	0	0	0	0	84	41	101	61	93
HAV_2432	HAV_2432_S80_R1_001.fastq.gz	Y2018	Check_B73xMo17			LN	N	sp4	spb3	2582	2	5	82	rep1	106	108	48	46	29	61	84	41	43	0	0	0	49	55	62	0	0	0	0	0	0	0	0	0	0	0	0	0	0	0	0	0	0	0	27
HAV_2433	HAV_2433_S88_R1_001.fastq.gz	Y2018	A554	PI 587138	nss	LN	S	sp1	spb1	3001	3	0	01	rep1	34	52	15	22	23	30	34	23	23	15	13	13	31	21	44	0	0	0	0	0	0	0	0	0	0	0	0	0	0	0	41	33	50	43	43
HAV_2434	HAV_2434_S96_R1_001.fastq.gz	Y2018	A554	PI 587138	nss	LN	S	sp1	spb1	3002	3	0	02	rep2	31	29	14	15	12	8	27	14	13	37	22	22	18	8	10	0	0	0	0	0	0	0	0	0	0	0	0	0	0	0	0	0	0	0	0
HAV_2435	HAV_2435_S104_R1_001.fastq.gz	Y2018	MT42	Ames 20140	mixed	LN	S	sp1	spb2	3019	3	0	19	rep1	32	43	25	22	34	30	32	24	23	0	0	0	36	27	26	0	0	0	0	0	0	0	0	0	0	0	0	0	0	0	0	0	0	66	0
HAV_2436	HAV_2436_S112_R1_001.fastq.gz	Y2018	MT42	Ames 20140	mixed	LN	S	sp1	spb2	3020	3	0	20	rep2	24	35	17	21	11	25	40	45	25	9	11	22	23	14	21	0	0	0	0	0	0	0	0	0	0	0	0	0	0	0	0	0	0	0	0
HAV_2437	HAV_2437_S120_R1_001.fastq.gz	Y2018	Check_B37xMo17			LN	S	sp1	spb2	3026	3	0	26	rep1	14	13	6	9	15	6	11	0	7	5	0	0	0	0	0	0	0	0	0	0	0	0	0	0	0	0	0	0	0	0	0	0	0	0	0
HAV_2438	HAV_2438_S1_R1_001.fastq.gz	Y2018	Check_B37xMo17			LN	S	sp1	spb3	3040	3	0	40	rep1	115	132	72	71	33	59	96	56	66	46	42	59	80	68	49	0	0	0	0	0	0	0	0	0	0	0	0	0	0	0	0	0	0	0	0
HAV_2439	HAV_2439_S9_R1_001.fastq.gz	Y2018	OH43	Ames 19288	nss	LN	S	sp1	spb3	3043	3	0	43	rep1	14	19	11	8	12	11	12	3	7	46	18	46	8	7	6	0	0	0	0	0	0	0	0	0	0	0	0	0	0	0	0	0	0	0	0
HAV_2440	HAV_2440_S17_R1_001.fastq.gz	Y2018	OH43	Ames 19288	nss	LN	S	sp1	spb3	3044	3	0	44	rep2	93	146	75	95	64	100	121	82	73	51	48	79	92	55	96	0	0	0	0	0	0	0	0	0	0	0	0	0	0	0	0	0	0	0	0
HAV_2441	HAV_2441_S25_R1_001.fastq.gz	Y2018	Check_B73xMo17			LN	S	sp2	spb1	3051	3	0	51	rep1	45	61	24	21	19	29	48	21	19	21	13	21	28	21	25	0	0	0	0	0	0	0	0	0	0	0	0	0	0	0	0	0	0	21	0
HAV_2442	HAV_2442_S33_R1_001.fastq.gz	Y2018	Check_B37xMo17			LN	S	sp2	spb1	3055	3	0	55	rep1	17	13	10	10	10	14	14	7	10	33	34	41	19	7	10	0	0	0	0	0	0	0	0	0	0	0	0	0	0	0	36	18	27	21	24
HAV_2443	HAV_2443_S41_R1_001.fastq.gz	Y2018	CML333	Ames 27101	ts	LN	S	sp2	spb1	3057	3	0	57	rep1	22	0	17	14	29	0	34	13	11	8	2	0	0	3	0	0	0	0	0	0	0	0	0	0	0	0	0	0	0	0	0	0	0	0	0
HAV_2444	HAV_2444_S49_R1_001.fastq.gz	Y2018	CML333	Ames 27101	ts	LN	S	sp2	spb1	3058	3	0	58	rep2	20	23	10	15	13	20	18	9	11	4	8	20	21	20	6	0	0	0	0	0	0	0	0	0	0	0	0	0	0	0	0	0	0	0	0
HAV_2445	HAV_2445_S57_R1_001.fastq.gz	Y2018	CML69	Ames 28184	ts	LN	S	sp2	spb2	3073	3	0	73	rep1	23	0	14	0	0	0	38	23	0	0	0	0	0	0	0	0	0	0	0	0	0	0	0	0	0	0	0	0	0	0	0	0	0	0	0
HAV_2446	HAV_2446_S2_R1_001.fastq.gz	Y2018	CML69	Ames 28184	ts	LN	S	sp2	spb2	3074	3	0	74	rep2	0	0	0	35	36	0	0	0	0	0	0	0	0	0	0	0	0	0	0	0	0	0	0	0	0	0	0	0	0	0	0	0	0	0	0
HAV_2447	HAV_2447_S10_R1_001.fastq.gz	Y2018	Check_B37xMo17			LN	S	sp1	spb1	3106	3	1	06	rep1	40	34	26	15	19	23	28	11	21	22	17	33	21	16	10	0	0	0	0	0	0	0	0	0	0	0	0	0	0	0	85	71	106	89	99
HAV_2448	HAV_2448_S18_R1_001.fastq.gz	Y2018	Check_B73xMo17			LN	S	sp1	spb3	3142	3	1	42	rep1	0	0	0	14	0	0	0	0	0	0	0	0	0	0	0	0	0	0	0	0	0	0	0	0	0	0	0	0	0	0	0	0	0	0	0
HAV_2449	HAV_2449_S26_R1_001.fastq.gz	Y2018	SD44	PI 524969	nss	LN	S	sp1	spb3	3143	3	1	43	rep1	4	4	2	5	3	3	4	2	4	12	11	12	2	2	5	0	0	0	0	0	0	0	0	0	0	0	0	0	0	0	0	0	0	0	0
HAV_2450	HAV_2450_S34_R1_001.fastq.gz	Y2018	SD44	PI 524969	nss	LN	S	sp1	spb3	3144	3	1	44	rep2	8	10	1	1	2	7	5	0	0	0	0	8	5	0	3	0	0	0	0	0	0	0	0	0	0	0	0	0	0	0	57	37	71	35	55
HAV_2451	HAV_2451_S42_R1_001.fastq.gz	Y2018	CML277	PI 595550	ts	LN	S	sp2	spb1	3159	3	1	59	rep1	10	9	2	1	2	7	13	3	5	13	10	16	3	8	4	0	0	0	0	0	0	0	0	0	0	0	0	0	0	0	0	0	0	0	0
HAV_2452	HAV_2452_S50_R1_001.fastq.gz	Y2018	CML277	PI 595550	ts	LN	S	sp2	spb1	3160	3	1	60	rep2	0	6	0	4	7	0	6	3	3	3	12	5	5	0	5	0	0	0	0	0	0	0	0	0	0	0	0	0	0	0	0	0	0	0	0
HAV_2453	HAV_2453_S58_R1_001.fastq.gz	Y2018	CML228	Ames 27088	ts	LN	S	sp2	spb1	3161	3	1	61	rep1	0	0	0	22	0	0	0	0	0	0	0	0	0	0	0	0	0	0	0	0	0	0	0	0	0	0	0	0	0	0	0	0	0	0	0
HAV_2454	HAV_2454_S3_R1_001.fastq.gz	Y2018	CML228	Ames 27088	ts	LN	S	sp2	spb1	3162	3	1	62	rep2	15	25	11	11	7	10	6	13	9	11	15	11	9	12	7	0	0	0	0	0	0	0	0	0	0	0	0	0	0	0	0	0	0	0	0
HAV_2455	HAV_2455_S11_R1_001.fastq.gz	Y2018	Check_B73xMo17			LN	S	sp2	spb2	3166	3	1	66	rep1	36	75	26	33	17	38	38	24	19	11	14	13	29	18	24	0	0	0	0	0	0	0	0	0	0	0	0	0	0	0	28	17	33	21	21
HAV_2456	HAV_2456_S19_R1_001.fastq.gz	Y2018	Check_B37xMo17			LN	S	sp2	spb2	3167	3	1	67	rep1	7	6	3	5	4	4	4	0	4	7	0	6	7	1	5	0	0	0	0	0	0	0	0	0	0	0	0	0	0	0	0	0	43	0	0
HAV_2457	HAV_2457_S27_R1_001.fastq.gz	Y2018	MS71	PI 587137	nss	LN	S	sp2	spb3	3181	3	1	81	rep1	0	9	0	0	0	0	7	0	0	0	0	23	17	0	3	0	0	0	0	0	0	0	0	0	0	0	0	0	0	0	0	0	0	0	0
HAV_2458	HAV_2458_S35_R1_001.fastq.gz	Y2018	MS71	PI 587137	nss	LN	S	sp2	spb3	3182	3	1	82	rep2	68	72	38	49	42	49	80	38	30	46	41	36	62	37	41	0	0	0	0	0	0	0	0	0	0	0	0	0	0	0	0	0	0	0	0
HAV_2459	HAV_2459_S43_R1_001.fastq.gz	Y2018	Check_B37xMo17			LN	S	sp2	spb3	3188	3	1	88	rep1	5	0	3	0	0	15	5	0	19	28	0	8	6	0	0	0	0	0	0	0	0	0	0	0	0	0	0	0	0	0	0	0	0	0	0
HAV_2460	HAV_2460_S51_R1_001.fastq.gz	Y2018	B76	PI 550483	ss	LN	S	sp1	spb1	3211	3	2	11	rep1	82	97	39	39	27	42	74	24	21	32	29	32	52	56	40	0	0	0	0	0	0	0	0	0	0	0	0	0	0	0	32	19	21	21	12
HAV_2461	HAV_2461_S59_R1_001.fastq.gz	Y2018	B76	PI 550483	ss	LN	S	sp1	spb1	3212	3	2	12	rep2	79	110	43	55	37	53	62	44	47	117	118	120	59	38	46	0	0	0	0	0	0	0	0	0	0	0	0	0	0	0	51	0	0	20	0
HAV_2462	HAV_2462_S4_R1_001.fastq.gz	Y2018	Check_B73xMo17			LN	S	sp1	spb1	3215	3	2	15	rep1	40	49	28	30	21	23	34	16	16	10	5	7	28	22	21	0	0	0	0	0	0	0	0	0	0	0	0	0	0	0	0	0	0	0	0
HAV_2463	HAV_2463_S12_R1_001.fastq.gz	Y2018	Check_B73xMo17			LN	S	sp1	spb2	3221	3	2	21	rep1	143	179	80	92	49	102	107	78	65	19	25	29	89	53	82	0	0	0	0	0	0	0	0	0	0	0	0	0	0	0	18	0	21	0	32
HAV_2464	HAV_2464_S20_R1_001.fastq.gz	Y2018	CML52	PI 595561	ts	LN	S	sp2	spb2	3277	3	2	77	rep1	8	21	12	6	5	17	12	9	11	11	7	8	14	14	9	0	0	0	0	0	0	0	0	0	0	0	0	0	0	0	0	0	0	0	0
HAV_2465	HAV_2465_S28_R1_001.fastq.gz	Y2018	CML52	PI 595561	ts	LN	S	sp2	spb2	3278	3	2	78	rep2	41	61	24	30	21	34	42	23	26	83	88	108	40	22	31	0	0	0	0	0	0	0	0	0	0	0	0	0	0	0	0	24	0	0	0
HAV_2466	HAV_2466_S36_R1_001.fastq.gz	Y2018	Check_B73xMo17			LN	S	sp2	spb3	3284	3	2	84	rep1	42	42	25	18	16	37	27	22	22	14	4	10	27	15	28	0	0	0	0	0	0	0	0	0	0	0	0	0	0	0	0	0	0	0	0
HAV_2467	HAV_2467_S44_R1_001.fastq.gz	Y2018	T232	PI 550522	mixed	LN	S	sp2	spb3	3285	3	2	85	rep1	0	0	0	0	0	0	71	0	0	0	0	0	0	0	0	0	0	0	0	0	0	0	0	0	0	0	0	0	0	0	0	0	0	0	0
HAV_2468	HAV_2468_S52_R1_001.fastq.gz	Y2018	T232	PI 550522	mixed	LN	S	sp2	spb3	3286	3	2	86	rep2	21	25	10	10	18	13	22	13	18	44	32	47	18	10	25	0	0	0	0	0	0	0	0	0	0	0	0	0	0	0	0	0	0	0	0
HAV_2469	HAV_2469_S60_R1_001.fastq.gz	Y2018	TZI8	PI 506246	ts	LN	S	sp2	spb3	3287	3	2	87	rep1	14	8	4	13	4	4	3	16	3	6	19	10	4	7	10	0	0	0	0	0	0	0	0	0	0	0	0	0	0	0	0	0	0	0	63
HAV_2470	HAV_2470_S5_R1_001.fastq.gz	Y2018	TZI8	PI 506246	ts	LN	S	sp2	spb3	3288	3	2	88	rep2	95	114	47	41	37	43	70	15	36	65	62	67	36	38	46	0	0	0	0	0	0	0	0	0	0	0	0	0	0	0	65	40	76	51	50
HAV_2471	HAV_2471_S13_R1_001.fastq.gz	Y2018	B73	PI 550473	ss	LN	S	sp3	spb1	3305	3	3	05	rep1	37	70	28	26	19	20	35	25	28	9	13	21	30	15	38	0	0	0	0	0	0	0	0	0	0	0	0	0	0	0	0	0	0	0	0
HAV_2472	HAV_2472_S21_R1_001.fastq.gz	Y2018	B73	PI 550473	ss	LN	S	sp3	spb1	3306	3	3	06	rep2	24	40	24	31	11	22	32	26	29	16	13	15	25	21	17	0	0	0	0	0	0	0	0	0	0	0	0	0	0	0	0	0	0	0	0
HAV_2473	HAV_2473_S29_R1_001.fastq.gz	Y2018	Check_B73xMo17			LN	S	sp3	spb1	3316	3	3	16	rep1	67	89	30	37	17	51	73	27	24	6	3	7	32	34	38	0	0	0	0	0	0	0	0	0	0	0	0	0	0	0	0	0	0	0	47
HAV_2474	HAV_2474_S37_R1_001.fastq.gz	Y2018	M37W	Ames 27133	mixed	LN	S	sp3	spb2	3323	3	3	23	rep1	12	18	15	11	7	14	17	8	8	31	22	20	4	12	12	0	0	0	0	0	0	0	0	0	0	0	0	0	0	0	0	0	0	0	0
HAV_2475	HAV_2475_S45_R1_001.fastq.gz	Y2018	M37W	Ames 27133	mixed	LN	S	sp3	spb2	3324	3	3	24	rep2	26	35	15	12	18	25	20	9	15	34	22	32	20	15	19	0	0	0	0	0	0	0	0	0	0	0	0	0	0	0	0	0	0	0	0
HAV_2476	HAV_2476_S53_R1_001.fastq.gz	Y2018	Check_B37xMo17			LN	S	sp3	spb2	3332	3	3	32	rep1	137	202	78	94	51	91	110	48	53	13	10	11	74	65	70	0	0	0	0	0	0	0	0	0	0	0	0	0	0	0	48	0	0	0	0
HAV_2477	HAV_2477_S61_R1_001.fastq.gz	Y2018	Check_B73xMo17			LN	S	sp4	spb1	3350	3	3	50	rep1	12	7	8	2	6	11	9	8	13	14	21	8	7	4	11	0	0	0	0	0	0	0	0	0	0	0	0	0	0	0	0	0	0	0	0
HAV_2478	HAV_2478_S6_R1_001.fastq.gz	Y2018	Check_B37xMo17			LN	S	sp4	spb2	3367	3	3	67	rep1	36	44	32	24	29	16	20	19	17	9	9	7	30	27	22	0	0	0	0	0	0	0	0	0	0	0	0	0	0	0	0	0	0	0	0
HAV_2479	HAV_2479_S14_R1_001.fastq.gz	Y2018	Check_B73xMo17			LN	S	sp4	spb2	3374	3	3	74	rep1	28	38	27	30	13	32	25	20	16	26	30	36	17	10	22	0	0	0	0	0	0	0	0	0	0	0	0	0	0	0	0	0	0	0	0
HAV_2480	HAV_2480_S22_R1_001.fastq.gz	Y2018	M162W	Ames 27134	nss	LN	S	sp4	spb2	3379	3	3	79	rep1	19	26	13	17	11	18	19	12	15	16	17	14	22	9	18	0	0	0	0	0	0	0	0	0	0	0	0	0	0	0	0	0	0	0	0
HAV_2481	HAV_2481_S30_R1_001.fastq.gz	Y2018	M162W	Ames 27134	nss	LN	S	sp4	spb2	3380	3	3	80	rep2	34	56	18	37	22	34	37	21	23	8	11	10	32	21	19	0	0	0	0	0	0	0	0	0	0	0	0	0	0	0	0	0	0	0	0
HAV_2482	HAV_2482_S38_R1_001.fastq.gz	Y2018	Check_B37xMo17			LN	S	sp4	spb3	3383	3	3	83	rep1	60	70	23	46	22	44	52	24	32	9	7	16	44	24	43	0	0	0	0	0	0	0	0	0	0	0	0	0	0	0	58	46	80	72	60
HAV_2483	HAV_2483_S46_R1_001.fastq.gz	Y2018	B97	PI 564682	nss	LN	S	sp3	spb1	3415	3	4	15	rep1	23	43	17	23	15	17	19	17	21	12	14	23	27	15	15	0	0	0	0	0	0	0	0	0	0	0	0	0	0	0	43	25	53	32	39
HAV_2484	HAV_2484_S54_R1_001.fastq.gz	Y2018	B97	PI 564682	nss	LN	S	sp3	spb1	3416	3	4	16	rep2	214	258	136	124	77	149	185	87	118	10	12	16	143	108	130	0	0	0	0	0	0	0	0	0	0	0	0	0	0	0	0	0	0	0	0
HAV_2485	HAV_2485_S62_R1_001.fastq.gz	Y2018	Check_B73xMo17			LN	S	sp3	spb2	3417	3	4	17	rep1	29	29	14	15	12	17	23	18	23	8	12	11	10	16	14	0	0	0	0	0	0	0	0	0	0	0	0	0	0	0	0	0	0	0	0
HAV_2486	HAV_2486_S7_R1_001.fastq.gz	Y2018	CML103	Ames 27081	ts	LN	S	sp3	spb2	3431	3	4	31	rep1	24	38	12	21	11	12	25	17	15	7	10	3	20	11	14	0	0	0	0	0	0	0	0	0	0	0	0	0	0	0	0	0	0	0	0
HAV_2487	HAV_2487_S15_R1_001.fastq.gz	Y2018	CML103	Ames 27081	ts	LN	S	sp3	spb2	3432	3	4	32	rep2	39	45	29	27	17	38	42	23	22	12	17	14	32	16	34	0	0	0	0	0	0	0	0	0	0	0	0	0	0	0	0	0	26	0	0
HAV_2488	HAV_2488_S23_R1_001.fastq.gz	Y2018	Check_B73xMo17			LN	S	sp3	spb3	3433	3	4	33	rep1	31	35	26	22	20	34	40	19	18	5	2	9	21	13	19	0	0	0	0	0	0	0	0	0	0	0	0	0	0	0	0	0	0	0	0
HAV_2489	HAV_2489_S31_R1_001.fastq.gz	Y2018	Check_B37xMo17			LN	S	sp3	spb3	3448	3	4	48	rep1	6	10	10	8	6	11	10	6	1	19	26	29	7	6	8	0	0	0	0	0	0	0	0	0	0	0	0	0	0	0	0	0	0	0	0
HAV_2490	HAV_2490_S39_R1_001.fastq.gz	Y2018	HP301	PI 587131	popcorn	LN	S	sp4	spb1	3453	3	4	53	rep1	0	0	0	24	0	0	0	0	13	3	0	0	0	0	23	0	0	0	0	0	0	0	0	0	0	0	0	0	0	0	0	0	0	0	0
HAV_2491	HAV_2491_S47_R1_001.fastq.gz	Y2018	HP301	PI 587131	popcorn	LN	S	sp4	spb1	3454	3	4	54	rep2	16	32	14	23	10	16	22	14	24	44	22	42	13	15	15	0	0	0	0	0	0	0	0	0	0	0	0	0	0	0	0	0	0	0	0
HAV_2492	HAV_2492_S55_R1_001.fastq.gz	Y2018	RTH3	roothairless3		LN	S	sp4	spb1	3457	3	4	57	rep1	24	33	15	11	21	19	21	16	13	31	25	37	18	15	14	0	0	0	0	0	0	0	0	0	0	0	0	0	0	0	17	18	24	17	21
HAV_2493	HAV_2493_S63_R1_001.fastq.gz	Y2018	RTH3	roothairless3		LN	S	sp4	spb1	3458	3	4	58	rep2	36	59	24	31	22	25	37	27	28	28	28	30	36	21	27	0	0	0	0	0	0	0	0	0	0	0	0	0	0	0	0	0	0	0	0
HAV_2494	HAV_2494_S8_R1_001.fastq.gz	Y2018	NC350	Ames 27171	ts	LN	S	sp4	spb2	3475	3	4	75	rep1	19	15	6	9	6	12	13	7	9	6	9	11	3	9	8	0	0	0	0	0	0	0	0	0	0	0	0	0	0	0	0	0	0	0	0
HAV_2495	HAV_2495_S16_R1_001.fastq.gz	Y2018	NC350	Ames 27171	ts	LN	S	sp4	spb2	3476	3	4	76	rep2	32	40	24	29	14	23	19	17	8	27	30	28	21	16	16	0	0	0	0	0	0	0	0	0	0	0	0	0	0	0	13	16	23	17	29
HAV_2496	HAV_2496_S24_R1_001.fastq.gz	Y2018	Check_B73xMo17			LN	S	sp4	spb3	3485	3	4	85	rep1	70	116	53	55	34	65	88	43	54	3	5	4	40	38	53	0	0	0	0	0	0	0	0	0	0	0	0	0	0	0	17	37	16	22	16
HAV_2497	HAV_2497_S32_R1_001.fastq.gz	Y2018	VA102	PI 587151	nss	LN	S	sp4	spb3	3493	3	4	93	rep1	19	29	17	16	12	17	24	14	14	32	24	34	5	10	11	0	0	0	0	0	0	0	0	0	0	0	0	0	0	0	0	0	0	0	0
HAV_2498	HAV_2498_S40_R1_001.fastq.gz	Y2018	VA102	PI 587151	nss	LN	S	sp4	spb3	3494	3	4	94	rep2	34	36	26	25	20	30	30	21	25	12	20	16	34	23	38	0	0	0	0	0	0	0	0	0	0	0	0	0	0	0	0	0	0	0	0
HAV_2499	HAV_2499_S48_R1_001.fastq.gz	Y2018	Check_B37xMo17			LN	S	sp3	spb1	3512	3	5	12	rep1	12	0	18	7	0	0	4	0	0	0	0	39	12	0	0	0	0	0	0	0	0	0	0	0	0	0	0	0	0	0	0	0	0	0	0
HAV_2500	HAV_2500_S56_R1_001.fastq.gz	Y2018	IL14H	Ames 27118	sweet	LN	S	sp3	spb2	3519	3	5	19	rep1	51	72	15	24	15	25	41	19	16	43	43	38	18	20	22	0	0	0	0	0	0	0	0	0	0	0	0	0	0	0	33	22	33	22	29
HAV_2502	HAV_2502_S65_R1_001.fastq.gz	Y2018	Check_B37xMo17			LN	S	sp4	spb1	3559	3	5	59	rep1	16	23	14	13	10	15	13	7	8	54	49	55	15	8	21	0	0	0	0	0	0	0	0	0	0	0	0	0	0	0	0	0	0	0	0
HAV_2503	HAV_2503_S73_R1_001.fastq.gz	Y2018	N28HT	Ames 27138	mixed	LN	S	sp4	spb2	3573	3	5	73	rep1	101	136	71	56	56	59	87	52	75	9	15	21	90	61	65	0	0	0	0	0	0	0	0	0	0	0	0	0	0	0	0	0	0	0	0
HAV_2504	HAV_2504_S81_R1_001.fastq.gz	Y2018	N28HT	Ames 27138	mixed	LN	S	sp4	spb2	3574	3	5	74	rep2	22	28	18	12	10	16	22	7	13	41	30	33	8	13	15	0	0	0	0	0	0	0	0	0	0	0	0	0	0	0	0	0	0	0	0
HAV_2505	HAV_2505_S89_R1_001.fastq.gz	Y2018	NC358	Ames 27175	ts	LN	S	sp4	spb3	3581	3	5	81	rep1	19	38	20	18	7	16	26	14	12	19	24	24	14	15	14	0	0	0	0	0	0	0	0	0	0	0	0	0	0	0	0	0	39	0	0
HAV_2506	HAV_2506_S97_R1_001.fastq.gz	Y2018	NC358	Ames 27175	ts	LN	S	sp4	spb3	3582	3	5	82	rep2	20	43	12	19	11	23	28	14	19	42	30	29	21	21	18	0	0	0	0	0	0	0	0	0	0	0	0	0	0	0	0	0	0	94	0
HAV_2507	HAV_2507_S105_R1_001.fastq.gz	Y2018	OH603	PI 573098	mixed	LN	S	sp4	spb3	3591	3	5	91	rep1	0	0	0	11	0	0	27	0	0	0	0	0	12	13	18	0	0	0	0	0	0	0	0	0	0	0	0	0	0	0	0	0	0	0	0
HAV_2508	HAV_2508_S113_R1_001.fastq.gz	Y2018	OH603	PI 573098	mixed	LN	S	sp4	spb3	3592	3	5	92	rep2	31	26	18	14	11	14	15	9	16	12	13	9	18	9	15	0	0	0	0	0	0	0	0	0	0	0	0	0	0	0	84	0	0	0	0
HAV_2509	HAV_2509_S121_R1_001.fastq.gz	Y2018	Check_B37xMo17			HN	S	sp1	spb1	4003	4	0	03	rep1	30	22	10	21	11	22	20	9	11	15	11	17	17	14	13	0	0	0	0	0	0	0	0	0	0	0	0	0	0	0	0	0	87	0	0
HAV_2510	HAV_2510_S66_R1_001.fastq.gz	Y2018	VA102	PI 587151	nss	HN	S	sp1	spb3	4037	4	0	37	rep1	13	43	8	0	6	23	0	11	0	0	2	4	8	0	9	0	0	0	0	0	0	0	0	0	0	0	0	0	0	0	0	0	0	0	0
HAV_2511	HAV_2511_S74_R1_001.fastq.gz	Y2018	VA102	PI 587151	nss	HN	S	sp1	spb3	4038	4	0	38	rep2	24	19	12	14	9	11	16	10	8	63	52	66	3	7	12	0	0	0	0	0	0	0	0	0	0	0	0	0	0	0	19	13	20	17	11
HAV_2512	HAV_2512_S82_R1_001.fastq.gz	Y2018	Check_B37xMo17			HN	S	sp1	spb3	4043	4	0	43	rep1	0	0	0	0	0	0	53	21	0	0	0	0	0	0	0	0	0	0	0	0	0	0	0	0	0	0	0	0	0	0	0	0	0	0	0
HAV_2513	HAV_2513_S90_R1_001.fastq.gz	Y2018	OH603	PI 573098	mixed	HN	S	sp1	spb3	4045	4	0	45	rep1	52	82	27	50	23	49	41	37	35	7	6	2	51	23	22	0	0	0	0	0	0	0	0	0	0	0	0	0	0	0	0	0	0	0	0
HAV_2514	HAV_2514_S98_R1_001.fastq.gz	Y2018	OH603	PI 573098	mixed	HN	S	sp1	spb3	4046	4	0	46	rep2	56	58	30	41	10	35	42	23	33	19	11	23	33	14	29	9	0	7	0	0	0	0	0	0	0	0	0	8	0	10	0	0	0	0	0
HAV_2515	HAV_2515_S106_R1_001.fastq.gz	Y2018	Check_B73xMo17			HN	S	sp2	spb2	4067	4	0	67	rep1	37	23	17	24	11	8	29	17	10	11	8	22	14	9	14	0	0	0	0	0	0	0	0	0	0	0	0	0	0	0	0	0	0	0	35
HAV_2516	HAV_2516_S114_R1_001.fastq.gz	Y2018	CML52	PI 595561	ts	HN	S	sp2	spb2	4073	4	0	73	rep1	20	27	10	15	6	15	9	10	6	5	7	9	18	10	10	0	0	0	0	0	0	0	0	0	0	0	0	0	0	0	0	0	0	0	0
HAV_2517	HAV_2517_S122_R1_001.fastq.gz	Y2018	CML52	PI 595561	ts	HN	S	sp2	spb2	4074	4	0	74	rep2	60	77	41	46	24	47	65	38	34	16	13	14	48	35	51	0	0	0	0	0	0	0	0	0	0	0	0	0	0	0	0	0	0	0	0
HAV_2518	HAV_2518_S67_R1_001.fastq.gz	Y2018	T232	PI 550522	mixed	HN	S	sp2	spb3	4081	4	0	81	rep1	7	13	8	9	4	9	6	7	9	33	23	35	5	2	5	0	0	0	0	0	0	0	0	0	0	0	0	0	0	0	0	0	0	0	0
HAV_2519	HAV_2519_S75_R1_001.fastq.gz	Y2018	T232	PI 550522	mixed	HN	S	sp2	spb3	4082	4	0	82	rep2	17	17	7	6	4	4	11	7	9	25	13	30	5	5	10	0	0	0	0	0	0	0	0	0	0	0	0	0	0	0	0	0	0	0	0
HAV_2520	HAV_2520_S83_R1_001.fastq.gz	Y2018	Check_B37xMo17			HN	S	sp2	spb3	4086	4	0	86	rep1	27	0	17	0	0	0	0	14	0	0	20	0	0	0	0	0	0	0	0	0	0	0	0	0	0	0	0	0	0	0	0	0	0	0	0
HAV_2521	HAV_2521_S91_R1_001.fastq.gz	Y2018	HP301	PI 587131	popcorn	HN	S	sp1	spb1	4107	4	1	07	rep1	16	0	0	0	0	0	0	0	0	0	0	33	0	0	0	0	0	0	0	0	0	0	0	0	0	0	0	0	0	0	0	0	0	0	0
HAV_2522	HAV_2522_S99_R1_001.fastq.gz	Y2018	HP301	PI 587131	popcorn	HN	S	sp1	spb1	4108	4	1	08	rep2	29	11	21	7	0	11	11	13	0	0	9	22	22	8	0	0	0	0	0	0	0	0	0	0	0	0	0	0	0	0	0	0	0	0	0
HAV_2523	HAV_2523_S107_R1_001.fastq.gz	Y2018	M162W	Ames 27134	nss	HN	S	sp1	spb2	4119	4	1	19	rep1	30	34	19	21	10	18	21	8	12	0	0	0	14	8	14	0	0	0	0	0	0	0	0	0	0	0	0	0	0	0	0	0	0	0	0
HAV_2524	HAV_2524_S115_R1_001.fastq.gz	Y2018	M162W	Ames 27134	nss	HN	S	sp1	spb2	4120	4	1	20	rep2	29	30	14	18	15	9	18	11	13	19	13	31	13	15	12	0	0	0	0	0	0	0	0	0	0	0	0	0	0	0	0	30	0	0	0
HAV_2525	HAV_2525_S123_R1_001.fastq.gz	Y2018	NC350	Ames 27171	ts	HN	S	sp1	spb2	4121	4	1	21	rep1	7	15	4	5	2	3	9	5	4	14	17	15	3	2	3	0	0	0	0	0	0	0	0	0	0	0	0	0	0	0	0	0	0	0	0
HAV_2526	HAV_2526_S68_R1_001.fastq.gz	Y2018	NC350	Ames 27171	ts	HN	S	sp1	spb2	4122	4	1	22	rep2	18	26	19	15	9	15	18	12	22	0	0	0	0	0	17	0	0	0	0	0	0	0	0	0	0	0	0	0	0	0	0	0	0	0	0
HAV_2527	HAV_2527_S76_R1_001.fastq.gz	Y2018	Check_B37xMo17			HN	S	sp1	spb2	4124	4	1	24	rep1	44	46	21	17	14	20	29	14	32	5	4	3	33	19	23	0	0	0	0	0	0	0	0	0	0	0	0	0	0	0	0	0	0	0	0
HAV_2528	HAV_2528_S84_R1_001.fastq.gz	Y2018	N28HT	Ames 27138	mixed	HN	S	sp1	spb2	4131	4	1	31	rep1	22	31	15	13	0	9	11	17	6	0	0	0	8	14	12	0	0	0	0	0	0	0	0	0	0	0	0	0	0	0	17	0	32	0	0
HAV_2529	HAV_2529_S92_R1_001.fastq.gz	Y2018	N28HT	Ames 27138	mixed	HN	S	sp1	spb2	4132	4	1	32	rep2	17	35	11	18	6	19	16	15	10	24	25	28	16	10	26	0	0	0	0	0	0	0	0	0	0	0	0	0	0	0	55	0	37	0	0
HAV_2530	HAV_2530_S100_R1_001.fastq.gz	Y2018	CML333	Ames 27101	ts	HN	S	sp2	spb1	4151	4	1	51	rep1	0	0	0	0	0	0	0	0	0	0	0	0	0	0	15	0	0	0	0	0	0	0	0	0	0	0	0	0	0	0	0	0	0	0	0
HAV_2531	HAV_2531_S108_R1_001.fastq.gz	Y2018	CML333	Ames 27101	ts	HN	S	sp2	spb1	4152	4	1	52	rep2	24	35	23	23	12	15	22	14	16	0	0	0	16	8	18	0	0	0	0	0	0	0	0	0	0	0	0	0	0	0	0	0	0	0	0
HAV_2532	HAV_2532_S116_R1_001.fastq.gz	Y2018	Check_B73xMo17			HN	S	sp2	spb1	4157	4	1	57	rep1	107	134	41	44	30	69	60	27	42	8	5	7	37	43	49	0	0	0	0	0	0	0	0	0	0	0	0	0	0	0	20	25	29	14	28
HAV_2533	HAV_2533_S124_R1_001.fastq.gz	Y2018	CML277	PI 595550	ts	HN	S	sp2	spb1	4159	4	1	59	rep1	0	0	0	0	0	0	59	0	0	0	0	0	0	0	0	0	0	0	0	0	0	0	0	0	0	0	0	0	0	0	0	0	0	0	0
HAV_2534	HAV_2534_S69_R1_001.fastq.gz	Y2018	CML277	PI 595550	ts	HN	S	sp2	spb1	4160	4	1	60	rep2	45	34	27	25	19	25	21	14	15	2	4	1	17	12	9	0	0	0	0	0	0	0	0	0	0	0	0	0	0	0	0	0	0	0	0
HAV_2535	HAV_2535_S77_R1_001.fastq.gz	Y2018	CML69	Ames 28184	ts	HN	S	sp2	spb2	4175	4	1	75	rep1	14	7	9	11	0	7	9	0	5	5	0	8	3	0	7	0	0	0	0	0	0	0	0	0	0	0	0	0	0	0	0	0	0	0	0
HAV_2536	HAV_2536_S85_R1_001.fastq.gz	Y2018	CML69	Ames 28184	ts	HN	S	sp2	spb2	4176	4	1	76	rep2	10	19	8	9	6	11	14	8	12	13	15	28	9	10	12	0	0	0	0	0	0	0	0	0	0	0	0	0	0	0	0	0	0	0	0
HAV_2537	HAV_2537_S93_R1_001.fastq.gz	Y2018	Check_B73xMo17			HN	S	sp2	spb3	4191	4	1	91	rep1	53	83	34	45	26	44	44	28	44	8	10	18	48	27	38	0	0	0	0	0	0	0	0	0	0	0	0	0	0	0	86	73	93	68	86
HAV_2538	HAV_2538_S101_R1_001.fastq.gz	Y2018	Check_B73xMo17			HN	S	sp1	spb1	4209	4	2	09	rep1	16	18	10	12	17	12	13	17	10	1	6	4	17	10	9	0	0	0	0	0	0	0	0	0	0	0	0	0	0	0	45	31	50	36	34
HAV_2539	HAV_2539_S109_R1_001.fastq.gz	Y2018	Check_B73xMo17			HN	S	sp1	spb2	4232	4	2	32	rep1	43	47	26	23	22	29	49	23	24	5	3	10	22	14	35	0	0	0	0	0	0	0	0	0	0	0	0	0	0	0	0	0	0	0	0
HAV_2540	HAV_2540_S117_R1_001.fastq.gz	Y2018	Check_B73xMo17			HN	S	sp1	spb3	4238	4	2	38	rep1	23	32	18	14	10	19	24	12	14	36	28	35	17	12	14	0	0	0	0	0	0	0	0	0	0	0	0	0	0	0	0	0	0	0	0
HAV_2541	HAV_2541_S1_R1_001.fastq.gz	Y2018	NC358	Ames 27175	ts	HN	S	sp1	spb3	4241	4	2	41	rep1	49	75	28	35	24	29	38	24	27	5	8	9	36	31	28	0	0	0	0	0	0	0	0	0	0	0	0	0	0	0	0	0	0	0	0
HAV_2542	HAV_2542_S70_R1_001.fastq.gz	Y2018	NC358	Ames 27175	ts	HN	S	sp1	spb3	4242	4	2	42	rep2	19	30	13	14	9	12	10	0	13	3	0	5	10	12	10	0	0	0	0	0	0	0	0	0	0	0	0	0	0	0	0	0	0	0	0
HAV_2543	HAV_2543_S78_R1_001.fastq.gz	Y2018	Check_B37xMo17			HN	S	sp2	spb1	4249	4	2	49	rep1	47	86	37	50	26	41	66	31	33	12	9	14	34	23	46	0	0	0	0	0	0	0	0	0	0	0	0	0	0	0	0	0	0	0	0
HAV_2544	HAV_2544_S86_R1_001.fastq.gz	Y2018	CML228	Ames 27088	ts	HN	S	sp2	spb1	4261	4	2	61	rep1	63	79	39	48	27	45	57	37	27	4	3	5	49	29	36	0	0	0	0	0	0	0	0	0	0	0	0	0	0	0	0	34	0	0	0
HAV_2545	HAV_2545_S94_R1_001.fastq.gz	Y2018	CML228	Ames 27088	ts	HN	S	sp2	spb1	4262	4	2	62	rep2	6	12	6	5	5	6	11	6	5	5	6	18	7	8	7	0	0	0	0	0	0	0	0	0	0	0	0	0	0	0	0	0	0	0	0
HAV_2546	HAV_2546_S102_R1_001.fastq.gz	Y2018	Check_B37xMo17			HN	S	sp2	spb2	4271	4	2	71	rep1	25	24	15	19	17	18	25	27	17	0	0	0	12	12	18	0	0	0	0	0	0	0	0	0	0	0	0	0	0	0	0	0	0	0	0
HAV_2547	HAV_2547_S110_R1_001.fastq.gz	Y2018	MS71	PI 587137	nss	HN	S	sp2	spb3	4291	4	2	91	rep1	0	0	0	1	0	0	3	4	0	0	13	15	12	0	15	0	0	0	0	0	0	0	0	0	0	0	0	0	0	0	0	0	0	0	40
HAV_2548	HAV_2548_S118_R1_001.fastq.gz	Y2018	MS71	PI 587137	nss	HN	S	sp2	spb3	4292	4	2	92	rep2	35	50	15	28	10	15	36	11	25	15	12	16	25	19	21	0	9	0	0	0	0	0	0	0	0	0	0	0	0	0	0	0	0	0	0
HAV_2549	HAV_2549_S126_R1_001.fastq.gz	Y2018	TZI8	PI 506246	ts	HN	S	sp2	spb3	4293	4	2	93	rep1	0	51	0	0	8	8	0	0	0	0	0	14	22	19	0	0	0	0	0	0	0	0	0	0	0	0	0	0	0	0	0	0	0	0	0
HAV_2550	HAV_2550_S71_R1_001.fastq.gz	Y2018	TZI8	PI 506246	ts	HN	S	sp2	spb3	4294	4	2	94	rep2	50	64	17	22	12	25	39	15	19	5	4	3	18	15	19	14	6	7	0	7	0	0	8	7	0	0	0	12	0	7	0	0	0	0	0
HAV_2551	HAV_2551_S79_R1_001.fastq.gz	Y2018	Check_B73xMo17			HN	S	sp3	spb1	4316	4	3	16	rep1	36	25	22	18	14	18	25	16	9	6	11	7	23	13	19	0	0	0	0	0	0	0	0	0	0	0	0	0	0	0	0	0	0	0	0
HAV_2552	HAV_2552_S87_R1_001.fastq.gz	Y2018	Check_B73xMo17			HN	S	sp3	spb3	4338	4	3	38	rep1	9	8	10	6	6	1	15	5	7	39	32	48	9	3	8	0	0	0	0	0	0	0	0	0	0	0	0	0	0	0	0	0	62	0	0
HAV_2553	HAV_2553_S95_R1_001.fastq.gz	Y2018	OH43	Ames 19288	nss	HN	S	sp3	spb3	4347	4	3	47	rep1	19	20	10	14	11	10	22	15	14	18	11	23	10	2	7	0	0	0	0	0	0	0	0	0	0	0	0	0	0	0	0	0	0	0	0
HAV_2554	HAV_2554_S103_R1_001.fastq.gz	Y2018	OH43	Ames 19288	nss	HN	S	sp3	spb3	4348	4	3	48	rep2	32	33	23	21	0	19	27	18	16	0	0	0	22	0	33	0	0	0	0	0	0	0	0	0	0	0	0	0	0	0	0	0	0	0	0
HAV_2555	HAV_2555_S111_R1_001.fastq.gz	Y2018	B73	PI 550473	ss	HN	S	sp4	spb1	4351	4	3	51	rep1	0	0	0	0	0	0	0	0	0	0	0	0	0	0	0	0	0	0	0	0	0	0	0	0	0	0	0	0	0	0	0	0	0	0	0
HAV_2556	HAV_2556_S119_R1_001.fastq.gz	Y2018	B73	PI 550473	ss	HN	S	sp4	spb1	4352	4	3	52	rep2	41	48	30	23	22	30	34	21	21	0	0	0	31	26	22	0	0	0	0	0	0	0	0	0	0	0	0	0	0	0	0	0	59	0	0
HAV_2557	HAV_2557_S127_R1_001.fastq.gz	Y2018	CML103	Ames 27081	ts	HN	S	sp4	spb2	4373	4	3	73	rep1	14	22	8	16	6	14	13	8	10	10	7	14	13	6	11	0	11	0	0	0	0	0	10	14	0	0	0	0	0	9	0	0	0	0	0
HAV_2558	HAV_2558_S72_R1_001.fastq.gz	Y2018	CML103	Ames 27081	ts	HN	S	sp4	spb2	4374	4	3	74	rep2	0	46	0	8	11	11	20	5	17	8	3	2	10	14	9	0	0	0	0	0	0	0	0	0	0	0	0	0	0	0	0	0	0	39	0
HAV_2559	HAV_2559_S80_R1_001.fastq.gz	Y2018	IL14H	Ames 27118	sweet	HN	S	sp4	spb2	4375	4	3	75	rep1	33	64	16	26	16	28	45	26	21	44	37	37	32	13	36	0	0	0	0	0	0	0	0	0	0	0	0	0	0	0	0	0	0	0	0
HAV_2560	HAV_2560_S88_R1_001.fastq.gz	Y2018	IL14H	Ames 27118	sweet	HN	S	sp4	spb2	4376	4	3	76	rep2	17	21	5	12	5	10	17	16	16	17	20	9	9	11	13	0	0	0	0	0	0	0	0	0	0	0	0	0	0	0	0	0	0	0	0
HAV_2561	HAV_2561_S96_R1_001.fastq.gz	Y2018	Check_B37xMo17			HN	S	sp4	spb3	4390	4	3	90	rep1	20	18	12	9	12	16	16	10	10	44	44	51	13	10	14	0	0	0	0	0	0	0	0	0	0	0	0	0	0	0	0	0	0	0	0
HAV_2562	HAV_2562_S104_R1_001.fastq.gz	Y2018	Check_B37xMo17			HN	S	sp3	spb1	4404	4	4	04	rep1	11	19	6	6	10	8	18	2	12	36	24	25	8	14	11	0	0	0	0	0	0	0	0	0	0	0	0	0	0	0	0	0	0	0	0
HAV_2563	HAV_2563_S112_R1_001.fastq.gz	Y2018	B76	PI 550483	ss	HN	S	sp3	spb1	4411	4	4	11	rep1	8	13	6	6	1	5	7	15	2	24	26	22	5	6	3	0	0	0	0	0	0	0	0	0	0	0	0	0	0	0	0	0	72	0	0
HAV_2564	HAV_2564_S120_R1_001.fastq.gz	Y2018	B76	PI 550483	ss	HN	S	sp3	spb1	4412	4	4	12	rep2	34	40	18	10	20	26	27	7	12	16	23	14	17	14	14	0	0	0	0	0	0	0	0	0	0	0	0	0	0	0	0	0	0	0	0
HAV_2565	HAV_2565_S128_R1_001.fastq.gz	Y2018	A554	PI 587138	nss	HN	S	sp3	spb1	4415	4	4	15	rep1	20	35	9	10	8	7	14	6	10	14	4	16	15	7	13	0	0	0	0	0	0	0	0	0	0	0	0	0	0	0	0	0	0	0	0
HAV_2566	HAV_2566_S1_R1_001.fastq.gz	Y2018	A554	PI 587138	nss	HN	S	sp3	spb1	4416	4	4	16	rep2	0	0	0	0	0	0	0	0	0	0	0	28	0	0	0	0	0	0	0	0	0	0	0	0	0	0	0	0	0	0	0	0	0	0	0
HAV_2567	HAV_2567_S9_R1_001.fastq.gz	Y2018	Check_B37xMo17			HN	S	sp4	spb2	4476	4	4	76	rep1	32	36	11	19	18	19	17	24	9	14	23	22	16	10	11	0	0	0	0	0	0	0	0	0	0	0	0	0	0	0	0	0	0	0	0
HAV_2568	HAV_2568_S17_R1_001.fastq.gz	Y2018	Check_B37xMo17			HN	S	sp3	spb2	4517	4	5	17	rep1	22	27	17	15	12	22	22	11	11	7	2	4	22	12	19	0	0	0	0	0	0	0	0	0	0	0	0	0	0	0	0	0	0	0	0
HAV_2569	HAV_2569_S25_R1_001.fastq.gz	Y2018	MT42	Ames 20140	mixed	HN	S	sp3	spb2	4521	4	5	21	rep1	60	46	35	35	20	33	37	27	30	27	20	35	25	17	18	0	0	0	0	0	0	0	0	0	0	0	0	0	0	0	0	0	0	0	0
HAV_2570	HAV_2570_S33_R1_001.fastq.gz	Y2018	MT42	Ames 20140	mixed	HN	S	sp3	spb2	4522	4	5	22	rep2	52	67	29	24	22	29	37	26	37	5	7	11	39	21	25	0	0	0	0	0	0	0	0	0	0	0	0	0	0	0	0	0	0	0	0
HAV_2571	HAV_2571_S41_R1_001.fastq.gz	Y2018	Check_B73xMo17			HN	S	sp3	spb2	4525	4	5	25	rep1	23	28	16	13	7	20	18	13	8	11	11	15	7	12	14	0	0	0	0	0	0	0	0	0	0	0	0	0	0	0	15	0	0	0	52
HAV_2572	HAV_2572_S49_R1_001.fastq.gz	Y2018	Check_B37xMo17			HN	S	sp3	spb3	4541	4	5	41	rep1	33	41	21	26	16	16	43	15	22	6	7	15	31	19	16	0	0	0	0	0	0	0	0	0	0	0	0	0	0	0	0	0	0	0	0
HAV_2573	HAV_2573_S57_R1_001.fastq.gz	Y2018	SD44	PI 524969	nss	HN	S	sp3	spb3	4545	4	5	45	rep1	46	61	23	38	26	34	48	19	24	34	25	28	37	19	29	0	0	0	0	0	0	0	0	0	0	0	0	0	0	0	0	0	0	0	0
HAV_2575	HAV_2575_S10_R1_001.fastq.gz	Y2018	B97	PI 564682	nss	HN	S	sp4	spb1	4551	4	5	51	rep1	104	119	61	54	38	64	92	47	62	34	45	40	68	39	56	0	0	0	0	0	0	0	0	0	0	0	0	0	0	0	0	0	0	0	0
HAV_2576	HAV_2576_S18_R1_001.fastq.gz	Y2018	B97	PI 564682	nss	HN	S	sp4	spb1	4552	4	5	52	rep2	48	58	29	39	20	38	51	31	31	9	11	3	46	35	40	0	0	0	0	0	0	0	0	0	0	0	0	0	0	0	0	0	0	49	0
HAV_2577	HAV_2577_S26_R1_001.fastq.gz	Y2018	Check_B73xMo17			HN	S	sp4	spb1	4559	4	5	59	rep1	25	40	14	13	18	19	24	14	11	21	14	21	13	9	14	0	0	0	0	0	0	0	0	0	0	0	0	0	0	0	0	0	0	0	0
HAV_2578	HAV_2578_S34_R1_001.fastq.gz	Y2018	Check_B37xMo17			HN	S	sp4	spb1	4562	4	5	62	rep1	48	73	24	38	24	28	51	28	33	33	29	52	42	20	34	0	0	0	0	0	0	0	0	0	0	0	0	0	0	0	43	27	53	39	50
HAV_2579	HAV_2579_S42_R1_001.fastq.gz	Y2018	RTH3	roothairless3		HN	S	sp4	spb2	4567	4	5	67	rep1	8	7	5	5	0	3	7	5	6	9	11	11	4	1	5	0	0	0	0	0	0	0	0	0	0	0	0	0	0	0	0	0	0	0	0
HAV_2580	HAV_2580_S50_R1_001.fastq.gz	Y2018	RTH3	roothairless3		HN	S	sp4	spb2	4568	4	5	68	rep2	17	36	15	18	9	7	11	13	8	4	3	8	16	15	13	0	0	0	0	0	0	0	0	0	0	0	0	0	0	0	0	0	0	0	0
HAV_2581	HAV_2581_S9_R1_001.fastq.gz	Y2018	Check_B73xMo17			HN	S	sp4	spb2	4569	4	5	69	rep1	27	28	10	15	22	15	19	20	20	25	23	20	18	12	16	0	0	0	0	0	0	0	0	0	0	0	0	0	0	0	0	0	0	0	55
HAV_2582	HAV_2582_S3_R1_001.fastq.gz	Y2018	M37W	Ames 27133	mixed	HN	S	sp4	spb2	4579	4	5	79	rep1	21	21	7	7	8	12	18	7	11	12	5	3	8	12	8	0	0	0	0	0	0	0	0	0	0	0	0	0	0	0	0	0	0	0	0
HAV_2583	HAV_2583_S11_R1_001.fastq.gz	Y2018	M37W	Ames 27133	mixed	HN	S	sp4	spb2	4580	4	5	80	rep2	25	38	18	10	13	14	17	17	9	14	10	17	11	18	11	0	0	0	0	0	0	0	0	0	0	0	0	0	0	0	19	0	0	0	35
HAV_2584	HAV_2584_S19_R1_001.fastq.gz	Y2018	Check_B73xMo17			HN	S	sp4	spb3	4583	4	5	83	rep1	12	27	6	7	4	6	12	6	8	5	3	4	11	10	9	0	0	0	0	0	0	0	0	0	0	0	0	0	0	0	0	0	23	0	32
HAV_4825	HAV_4825_S1_R1_001.fastq.gz	Y2019	A641	Ames 19311	mixed	HN	N	sp1	spb1	1001	1	0	01	rep1	98	131	39	35	17	38	38	31	24	10	13	8	15	43	47	0	0	0	0	0	0	0	0	0	0	0	0	0	0	0	0	0	0	0	0
HAV_4826	HAV_4826_S10_R1_001.fastq.gz	Y2019	A641	Ames 19311	mixed	HN	N	sp1	spb1	1001	1	0	01	rep2	317	447	133	72	56	117	144	109	84	8	3	7	60	132	145	0	0	0	0	0	0	0	0	0	0	0	0	0	0	0	0	0	0	0	0
HAV_4827	HAV_4827_S19_R1_001.fastq.gz	Y2019	A641	Ames 19311	mixed	HN	N	sp1	spb1	1001	1	0	01	rep3	243	439	98	72	51	98	131	77	85	11	13	11	47	107	133	0	0	0	0	0	0	0	0	0	0	0	0	0	0	0	0	0	0	0	0
HAV_4828	HAV_4828_S27_R1_001.fastq.gz	Y2019	B76	PI 550483	ss	HN	N	sp1	spb1	1003	1	0	03	rep1	58	113	18	13	13	14	32	19	22	23	29	17	6	21	26	0	0	0	0	0	0	0	0	0	0	0	0	0	0	0	0	0	0	0	0
HAV_4829	HAV_4829_S35_R1_001.fastq.gz	Y2019	B76	PI 550483	ss	HN	N	sp1	spb1	1003	1	0	03	rep2	72	115	30	18	8	21	30	30	15	43	43	38	12	23	37	5	0	0	0	0	0	0	0	0	0	0	0	0	0	0	44	0	0	0	0
HAV_4830	HAV_4830_S43_R1_001.fastq.gz	Y2019	B76	PI 550483	ss	HN	N	sp1	spb1	1003	1	0	03	rep3	164	292	78	65	39	75	97	62	74	40	13	22	54	79	114	0	0	0	0	0	0	0	0	0	0	0	0	0	0	0	0	0	0	0	0
HAV_4831	HAV_4831_S51_R1_001.fastq.gz	Y2019	A654	PI 587141	nss	HN	N	sp1	spb1	1006	1	0	06	rep1	20	47	6	11	0	11	11	9	10	7	7	0	0	13	12	14	29	13	6	18	5	0	14	0	7	24	0	14	20	15	0	0	0	0	0
HAV_4832	HAV_4832_S59_R1_001.fastq.gz	Y2019	A654	PI 587141	nss	HN	N	sp1	spb1	1006	1	0	06	rep2	55	51	14	11	9	16	18	13	10	24	31	10	8	11	23	9	14	0	8	14	0	0	0	0	0	0	0	9	0	16	0	0	0	0	0
HAV_4833	HAV_4833_S2_R1_001.fastq.gz	Y2019	A654	PI 587141	nss	HN	N	sp1	spb1	1006	1	0	06	rep3	101	149	33	26	9	20	40	25	35	36	53	21	21	39	39	0	0	0	0	0	0	0	0	0	0	0	0	0	0	0	0	0	0	0	0
HAV_4834	HAV_4834_S11_R1_001.fastq.gz	Y2019	A239	Ames 23405	nss	HN	N	sp1	spb1	1008	1	0	08	rep1	36	36	25	0	0	14	49	16	12	0	0	0	0	28	27	0	0	0	0	0	0	0	0	0	0	0	0	0	0	0	0	0	0	0	0
HAV_4835	HAV_4835_S20_R1_001.fastq.gz	Y2019	A239	Ames 23405	nss	HN	N	sp1	spb1	1008	1	0	08	rep2	0	0	0	0	0	0	0	0	0	0	0	0	0	0	0	0	0	0	0	0	0	0	0	0	0	0	0	0	0	0	0	0	0	0	0
HAV_4836	HAV_4836_S28_R1_001.fastq.gz	Y2019	A239	Ames 23405	nss	HN	N	sp1	spb1	1008	1	0	08	rep3	117	185	39	36	10	34	64	39	33	38	39	28	20	34	51	0	0	0	0	0	0	0	0	0	0	0	0	0	0	0	0	0	0	0	0
HAV_4837	HAV_4837_S36_R1_001.fastq.gz	Y2019	A682	PI 587143	nss	HN	N	sp1	spb1	1009	1	0	09	rep1	161	248	70	38	18	58	72	53	43	0	0	0	26	69	69	0	0	0	0	0	0	0	0	0	0	0	0	0	0	0	17	0	0	0	0
HAV_4838	HAV_4838_S44_R1_001.fastq.gz	Y2019	A682	PI 587143	nss	HN	N	sp1	spb1	1009	1	0	09	rep2	205	319	92	70	38	84	93	78	63	9	8	0	48	73	112	0	0	0	0	0	0	0	0	0	0	0	0	0	0	9	0	0	0	0	0
HAV_4839	HAV_4839_S52_R1_001.fastq.gz	Y2019	A682	PI 587143	nss	HN	N	sp1	spb1	1009	1	0	09	rep3	370	628	187	126	84	185	208	120	133	0	0	0	75	190	200	0	0	0	0	0	0	0	0	0	0	0	0	0	0	0	0	0	0	0	0
HAV_4840	HAV_4840_S60_R1_001.fastq.gz	Y2019	C123	Ames 19313	nss	HN	N	sp1	spb1	1011	1	0	11	rep1	64	77	33	13	16	12	25	25	14	27	41	17	8	18	35	0	13	9	7	10	0	0	0	0	0	9	0	11	10	12	0	0	0	0	0
HAV_4841	HAV_4841_S3_R1_001.fastq.gz	Y2019	C123	Ames 19313	nss	HN	N	sp1	spb1	1011	1	0	11	rep2	19	51	14	7	5	11	14	8	11	20	30	9	10	13	12	0	8	9	0	0	0	0	0	0	0	0	0	0	0	0	23	0	20	0	0
HAV_4842	HAV_4842_S12_R1_001.fastq.gz	Y2019	C123	Ames 19313	nss	HN	N	sp1	spb1	1011	1	0	11	rep3	49	78	33	19	7	16	46	24	20	70	77	37	14	22	27	11	21	0	0	0	0	0	0	0	0	0	0	0	6	7	66	35	40	20	23
HAV_4843	HAV_4843_S21_R1_001.fastq.gz	Y2019	A554	PI 587138	nss	HN	N	sp1	spb1	1013	1	0	13	rep1	71	120	21	13	14	33	43	23	30	6	10	2	22	31	46	0	0	0	0	0	0	0	0	0	0	0	0	0	0	0	0	0	0	0	0
HAV_4844	HAV_4844_S29_R1_001.fastq.gz	Y2019	A554	PI 587138	nss	HN	N	sp1	spb1	1013	1	0	13	rep2	11	11	7	2	4	4	5	2	1	23	15	9	3	0	4	0	6	0	0	0	0	0	0	0	0	0	0	0	0	0	0	0	0	0	0
HAV_4845	HAV_4845_S37_R1_001.fastq.gz	Y2019	A554	PI 587138	nss	HN	N	sp1	spb1	1013	1	0	13	rep3	82	112	43	24	15	26	46	27	24	0	0	0	20	36	44	0	0	0	0	0	0	0	0	0	0	0	0	0	0	0	0	0	0	0	0
HAV_4846	HAV_4846_S45_R1_001.fastq.gz	Y2019	EP1	Ames 27111	mixed	HN	N	sp1	spb2	1015	1	0	15	rep1	278	526	122	84	45	105	156	103	92	9	12	10	56	116	163	0	0	0	0	0	0	0	0	0	0	0	0	0	0	0	28	0	18	0	0
HAV_4847	HAV_4847_S53_R1_001.fastq.gz	Y2019	EP1	Ames 27111	mixed	HN	N	sp1	spb2	1015	1	0	15	rep2	182	269	68	52	34	58	75	58	52	8	7	4	37	61	95	0	0	0	0	0	0	0	0	0	0	0	0	0	0	0	0	0	0	0	0
HAV_4848	HAV_4848_S61_R1_001.fastq.gz	Y2019	EP1	Ames 27111	mixed	HN	N	sp1	spb2	1015	1	0	15	rep3	130	176	55	31	29	59	71	42	46	0	0	0	25	51	58	0	0	0	0	0	0	0	0	0	0	0	0	0	0	0	0	0	0	0	0
HAV_4849	HAV_4849_S4_R1_001.fastq.gz	Y2019	Check_B73xMo17			HN	N	sp1	spb2	1018	1	0	18	rep1	54	63	28	9	13	21	32	17	24	21	23	9	13	16	18	13	11	9	6	0	0	0	0	0	0	0	0	0	7	14	0	0	0	0	0
HAV_4850	HAV_4850_S13_R1_001.fastq.gz	Y2019	Check_B73xMo17			HN	N	sp1	spb2	1018	1	0	18	rep2	22	41	5	13	4	10	11	11	13	21	18	16	12	16	14	0	0	0	0	0	0	0	0	0	0	0	0	0	0	0	0	0	0	0	0
HAV_4851	HAV_4851_S22_R1_001.fastq.gz	Y2019	Check_B73xMo17			HN	N	sp1	spb2	1018	1	0	18	rep3	90	97	28	13	13	21	30	16	21	14	18	14	14	20	47	4	15	0	8	14	0	0	0	0	0	0	0	0	8	12	0	0	0	0	0
HAV_4852	HAV_4852_S30_R1_001.fastq.gz	Y2019	F7	PI 257507	mixed	HN	N	sp1	spb2	1020	1	0	20	rep1	38	44	7	5	6	15	21	24	9	2	4	8	18	17	13	5	5	10	0	0	0	0	0	0	0	0	0	0	0	0	0	0	0	0	0
HAV_4853	HAV_4853_S38_R1_001.fastq.gz	Y2019	F7	PI 257507	mixed	HN	N	sp1	spb2	1020	1	0	20	rep2	22	45	14	7	4	6	12	9	9	5	5	8	10	4	16	16	23	14	8	19	6	7	8	0	0	13	0	13	15	29	0	0	0	0	0
HAV_4854	HAV_4854_S46_R1_001.fastq.gz	Y2019	F7	PI 257507	mixed	HN	N	sp1	spb2	1020	1	0	20	rep3	59	113	21	24	9	22	27	21	21	4	14	4	14	20	22	0	9	0	0	0	0	0	0	0	0	0	0	0	0	0	26	0	0	0	0
HAV_4855	HAV_4855_S54_R1_001.fastq.gz	Y2019	I29	PI 686057	popcorn	HN	N	sp1	spb2	1021	1	0	21	rep1	331	541	143	99	75	133	140	117	96	16	7	4	64	160	156	0	0	0	0	0	0	0	0	0	0	0	0	0	0	0	40	0	0	0	0
HAV_4856	HAV_4856_S62_R1_001.fastq.gz	Y2019	I29	PI 686057	popcorn	HN	N	sp1	spb2	1021	1	0	21	rep2	49	91	25	17	9	17	26	10	9	35	38	25	12	18	12	0	17	8	0	0	0	0	0	0	0	0	0	0	6	3	0	0	0	0	0
HAV_4857	HAV_4857_S5_R1_001.fastq.gz	Y2019	I29	PI 686057	popcorn	HN	N	sp1	spb2	1021	1	0	21	rep3	141	229	66	29	22	43	54	44	32	18	34	11	21	69	66	18	36	25	17	10	8	8	9	0	11	16	0	13	17	19	27	19	28	0	0
HAV_4858	HAV_4858_S14_R1_001.fastq.gz	Y2019	CO106	Ames 27105	nss	HN	N	sp1	spb2	1024	1	0	24	rep1	36	74	35	13	5	17	28	15	11	26	34	12	6	23	28	0	0	0	0	0	0	0	0	0	0	0	0	0	0	0	247	120	157	62	101
HAV_4859	HAV_4859_S23_R1_001.fastq.gz	Y2019	CO106	Ames 27105	nss	HN	N	sp1	spb2	1024	1	0	24	rep2	17	32	9	8	3	10	9	6	6	30	31	28	3	7	7	0	0	0	0	0	0	0	0	0	0	0	0	0	0	0	0	0	0	0	0
HAV_4860	HAV_4860_S31_R1_001.fastq.gz	Y2019	CO106	Ames 27105	nss	HN	N	sp1	spb2	1024	1	0	24	rep3	25	39	7	8	1	8	17	11	4	66	45	28	2	7	8	0	14	0	0	0	0	0	0	0	0	0	0	0	0	0	0	0	0	0	0
HAV_4861	HAV_4861_S39_R1_001.fastq.gz	Y2019	MS153	Ames 24734	nss	HN	N	sp1	spb2	1025	1	0	25	rep1	21	38	11	11	2	18	8	8	5	5	6	7	6	5	14	0	6	0	0	0	0	0	0	0	0	0	0	0	0	0	0	0	0	0	0
HAV_4862	HAV_4862_S47_R1_001.fastq.gz	Y2019	MS153	Ames 24734	nss	HN	N	sp1	spb2	1025	1	0	25	rep2	6	14	6	2	1	2	4	1	3	38	46	27	0	3	6	12	9	11	8	5	0	0	0	0	0	0	0	0	6	10	27	0	22	0	0
HAV_4863	HAV_4863_S55_R1_001.fastq.gz	Y2019	MS153	Ames 24734	nss	HN	N	sp1	spb2	1025	1	0	25	rep3	23	52	17	8	3	9	12	7	9	55	57	35	1	18	14	0	0	0	0	0	0	0	0	0	0	0	0	0	0	0	0	0	0	0	0
HAV_4864	HAV_4864_S63_R1_001.fastq.gz	Y2019	MT42	Ames 20140	mixed	HN	N	sp1	spb2	1027	1	0	27	rep1	53	80	32	19	11	27	42	32	19	25	21	16	8	20	24	26	19	11	14	24	0	0	0	0	15	11	0	6	18	20	0	0	19	0	0
HAV_4865	HAV_4865_S6_R1_001.fastq.gz	Y2019	MT42	Ames 20140	mixed	HN	N	sp1	spb2	1027	1	0	27	rep2	30	42	17	9	7	14	9	7	13	28	21	15	5	14	19	0	11	0	5	0	0	0	0	0	0	0	0	0	9	5	0	0	0	0	0
HAV_4866	HAV_4866_S15_R1_001.fastq.gz	Y2019	MT42	Ames 20140	mixed	HN	N	sp1	spb2	1027	1	0	27	rep3	57	83	22	18	7	22	28	17	15	9	20	8	15	24	24	0	9	0	0	0	0	0	0	0	0	0	0	5	0	12	0	22	0	0	0
HAV_4867	HAV_4867_S24_R1_001.fastq.gz	Y2019	NC262	PI 531085	nss	HN	N	sp1	spb3	1029	1	0	29	rep1	4	16	0	0	0	0	0	0	0	22	44	26	0	0	0	0	0	0	0	0	0	0	0	0	0	0	0	0	0	0	0	0	0	0	0
HAV_4868	HAV_4868_S32_R1_001.fastq.gz	Y2019	NC262	PI 531085	nss	HN	N	sp1	spb3	1029	1	0	29	rep2	47	48	19	6	11	19	24	14	5	6	16	4	7	17	23	0	0	0	0	0	0	0	0	0	0	0	0	0	0	6	0	0	0	0	0
HAV_4869	HAV_4869_S40_R1_001.fastq.gz	Y2019	NC262	PI 531085	nss	HN	N	sp1	spb3	1029	1	0	29	rep3	70	119	19	22	7	19	33	27	8	9	13	4	16	20	33	0	0	0	0	0	0	0	0	0	0	0	0	0	0	0	0	0	0	0	0
HAV_4870	HAV_4870_S48_R1_001.fastq.gz	Y2019	N192	PI 550566	ss	HN	N	sp1	spb3	1031	1	0	31	rep1	116	191	52	39	18	38	47	55	27	6	6	4	27	51	66	6	0	0	0	0	0	0	0	0	0	0	0	0	0	0	30	0	0	0	0
HAV_4871	HAV_4871_S56_R1_001.fastq.gz	Y2019	N192	PI 550566	ss	HN	N	sp1	spb3	1031	1	0	31	rep2	126	222	43	42	20	37	70	52	39	16	15	7	32	45	58	11	6	10	0	0	0	0	0	0	0	6	0	0	13	4	0	0	0	0	0
HAV_4872	HAV_4872_S64_R1_001.fastq.gz	Y2019	N192	PI 550566	ss	HN	N	sp1	spb3	1031	1	0	31	rep3	43	54	14	12	5	18	15	20	13	35	33	19	8	13	20	8	11	0	0	0	0	0	0	0	0	0	0	0	0	0	78	37	55	37	35
HAV_4873	HAV_4873_S7_R1_001.fastq.gz	Y2019	VA59	Ames 19016	nss	HN	N	sp1	spb3	1034	1	0	34	rep1	31	52	11	8	5	9	11	11	13	7	8	11	9	11	12	0	11	0	0	6	0	0	0	0	0	0	0	0	0	0	0	0	0	0	0
HAV_4874	HAV_4874_S16_R1_001.fastq.gz	Y2019	VA59	Ames 19016	nss	HN	N	sp1	spb3	1034	1	0	34	rep2	16	20	6	7	2	1	4	3	2	24	35	16	0	2	5	7	18	9	5	15	7	0	0	0	0	5	0	5	10	10	0	0	0	0	0
HAV_4875	HAV_4875_S25_R1_001.fastq.gz	Y2019	VA59	Ames 19016	nss	HN	N	sp1	spb3	1034	1	0	34	rep3	6	13	7	2	1	8	1	3	3	20	12	14	5	5	5	0	0	0	0	0	0	0	0	0	0	0	0	0	0	0	0	0	0	0	0
HAV_4876	HAV_4876_S33_R1_001.fastq.gz	Y2019	NC292	Ames 27142	ss	HN	N	sp1	spb3	1035	1	0	35	rep1	29	52	13	10	8	12	15	11	11	8	15	6	3	14	19	0	0	0	0	0	0	0	0	0	0	0	0	0	0	0	0	0	0	0	0
HAV_4877	HAV_4877_S41_R1_001.fastq.gz	Y2019	NC292	Ames 27142	ss	HN	N	sp1	spb3	1035	1	0	35	rep2	74	115	20	13	17	14	28	17	27	9	17	13	12	24	34	0	0	0	0	0	0	0	0	0	0	0	0	0	0	0	0	0	0	0	0
HAV_4878	HAV_4878_S49_R1_001.fastq.gz	Y2019	NC292	Ames 27142	ss	HN	N	sp1	spb3	1035	1	0	35	rep3	33	65	20	14	6	16	12	16	11	9	9	3	9	16	15	0	0	0	0	0	0	0	0	0	0	0	0	0	0	0	0	0	0	0	0
HAV_4879	HAV_4879_S57_R1_001.fastq.gz	Y2019	SD44	PI 524969	nss	HN	N	sp1	spb3	1037	1	0	37	rep1	19	25	8	6	4	8	4	8	7	30	36	21	2	7	8	0	5	0	0	0	0	0	0	0	0	0	0	0	0	0	0	0	0	0	0
HAV_4880	HAV_4880_S65_R1_001.fastq.gz	Y2019	SD44	PI 524969	nss	HN	N	sp1	spb3	1037	1	0	37	rep2	40	62	7	9	6	10	22	10	12	14	20	14	5	14	17	23	24	19	13	21	0	7	11	0	9	11	0	13	27	14	0	0	0	0	0
HAV_4881	HAV_4881_S8_R1_001.fastq.gz	Y2019	SD44	PI 524969	nss	HN	N	sp1	spb3	1037	1	0	37	rep3	21	40	12	11	4	11	13	11	10	47	49	29	5	13	25	0	0	0	0	0	0	0	0	0	0	0	0	0	0	0	0	0	0	0	0
HAV_4882	HAV_4882_S17_R1_001.fastq.gz	Y2019	W182B	Ames 19330	nss	HN	N	sp1	spb3	1040	1	0	40	rep1	501	891	213	147	94	178	252	164	143	0	0	0	91	199	244	0	0	0	0	0	0	0	0	0	0	0	0	0	0	0	0	0	0	0	0
HAV_4883	HAV_4883_S26_R1_001.fastq.gz	Y2019	W182B	Ames 19330	nss	HN	N	sp1	spb3	1040	1	0	40	rep2	241	424	105	73	53	97	139	99	85	0	0	0	51	122	131	0	0	0	0	0	0	0	0	0	0	0	0	0	0	0	0	0	0	0	0
HAV_4884	HAV_4884_S34_R1_001.fastq.gz	Y2019	W182B	Ames 19330	nss	HN	N	sp1	spb3	1040	1	0	40	rep3	43	89	22	16	7	20	27	18	18	0	0	0	14	20	33	0	0	0	0	0	0	0	0	0	0	0	0	0	0	0	0	0	0	0	0
HAV_4885	HAV_4885_S42_R1_001.fastq.gz	Y2019	Check_B73xMo17			HN	N	sp1	spb3	1042	1	0	42	rep1	31	61	15	9	14	11	22	15	15	5	14	9	14	15	16	0	0	0	0	0	0	0	0	0	0	0	0	0	0	0	0	0	0	0	0
HAV_4886	HAV_4886_S50_R1_001.fastq.gz	Y2019	Check_B73xMo17			HN	N	sp1	spb3	1042	1	0	42	rep2	78	112	37	20	7	28	42	22	25	29	33	20	17	33	28	7	12	12	5	0	0	0	0	0	0	6	0	0	8	14	0	0	0	0	0
HAV_4887	HAV_4887_S58_R1_001.fastq.gz	Y2019	Check_B73xMo17			HN	N	sp1	spb3	1042	1	0	42	rep3	61	116	32	19	19	30	33	30	19	3	3	0	21	52	43	0	0	0	0	0	0	0	0	0	0	0	0	0	0	0	23	0	0	0	0
HAV_4888	HAV_4888_S66_R1_001.fastq.gz	Y2019	CI31A	Ames 21512	nss	HN	N	sp2	spb1	1044	1	0	44	rep1	93	150	34	29	18	25	34	23	33	14	23	7	26	40	51	0	5	0	0	0	0	0	0	0	0	0	0	0	0	0	0	0	0	0	0
HAV_4889	HAV_4889_S67_R1_001.fastq.gz	Y2019	CI31A	Ames 21512	nss	HN	N	sp2	spb1	1044	1	0	44	rep2	33	48	10	12	7	8	16	17	11	8	11	11	6	16	13	0	0	0	0	0	0	0	0	0	0	0	0	0	0	0	0	0	0	0	28
HAV_4890	HAV_4890_S75_R1_001.fastq.gz	Y2019	CI31A	Ames 21512	nss	HN	N	sp2	spb1	1044	1	0	44	rep3	284	483	120	101	69	109	152	94	92	0	0	0	72	124	154	0	0	0	0	0	0	0	0	0	0	0	0	0	0	0	0	0	0	0	0
HAV_4891	HAV_4891_S83_R1_001.fastq.gz	Y2019	DE1	PI 606329	nss	HN	N	sp2	spb1	1046	1	0	46	rep1	15	31	10	8	4	13	19	4	4	34	32	34	7	11	12	0	0	0	0	0	0	0	0	0	0	0	0	0	0	0	49	0	0	0	0
HAV_4892	HAV_4892_S91_R1_001.fastq.gz	Y2019	DE1	PI 606329	nss	HN	N	sp2	spb1	1046	1	0	46	rep2	29	41	9	0	0	11	22	7	2	3	6	0	0	10	22	0	0	0	0	0	0	0	0	0	0	0	0	0	0	0	0	0	0	0	0
HAV_4893	HAV_4893_S99_R1_001.fastq.gz	Y2019	DE1	PI 606329	nss	HN	N	sp2	spb1	1046	1	0	46	rep3	134	214	66	42	28	38	50	48	51	2	2	1	30	55	73	0	0	0	0	0	0	0	0	0	0	0	0	0	0	0	0	0	0	0	0
HAV_4894	HAV_4894_S107_R1_001.fastq.gz	Y2019	Check_B73xMo17			HN	N	sp2	spb1	1048	1	0	48	rep1	63	103	46	24	18	35	37	29	23	0	0	0	16	35	35	0	0	0	0	0	0	0	0	0	0	0	0	0	0	0	0	0	0	0	0
HAV_4895	HAV_4895_S115_R1_001.fastq.gz	Y2019	Check_B73xMo17			HN	N	sp2	spb1	1048	1	0	48	rep2	20	31	14	0	0	12	20	15	26	0	0	0	0	0	12	0	0	0	0	0	0	0	0	0	0	0	0	0	0	0	0	0	0	0	0
HAV_4896	HAV_4896_S123_R1_001.fastq.gz	Y2019	Check_B73xMo17			HN	N	sp2	spb1	1048	1	0	48	rep3	42	63	22	17	8	20	30	19	35	0	0	0	8	29	26	0	0	0	0	0	0	0	0	0	0	0	0	0	0	0	107	67	93	33	40
HAV_4897	HAV_4897_S68_R1_001.fastq.gz	Y2019	A635	Ames 19309	ss	HN	N	sp2	spb1	1050	1	0	50	rep1	25	33	13	4	3	12	10	9	6	16	26	11	3	13	14	0	0	0	0	0	0	0	0	0	0	0	0	0	0	0	0	0	0	0	0
HAV_4898	HAV_4898_S76_R1_001.fastq.gz	Y2019	A635	Ames 19309	ss	HN	N	sp2	spb1	1050	1	0	50	rep2	116	193	53	31	25	37	70	40	37	0	0	0	15	44	54	0	0	0	0	0	0	0	0	0	0	0	0	0	0	6	0	0	0	0	0
HAV_4899	HAV_4899_S84_R1_001.fastq.gz	Y2019	A635	Ames 19309	ss	HN	N	sp2	spb1	1050	1	0	50	rep3	75	126	30	13	13	31	38	30	14	23	32	20	23	28	43	28	38	22	14	29	11	9	12	0	13	14	6	17	20	30	42	38	26	0	24
HAV_4900	HAV_4900_S92_R1_001.fastq.gz	Y2019	Check_B73xMo17			HN	N	sp2	spb1	1051	1	0	51	rep1	29	53	26	13	12	27	22	12	10	20	37	14	12	10	17	7	10	0	0	0	0	0	0	0	0	8	0	3	6	9	0	0	0	0	0
HAV_4901	HAV_4901_S100_R1_001.fastq.gz	Y2019	Check_B73xMo17			HN	N	sp2	spb1	1051	1	0	51	rep2	17	39	9	10	0	15	0	13	9	8	12	3	8	7	6	0	16	0	0	12	0	0	0	0	0	0	4	0	0	26	0	0	0	0	0
HAV_4902	HAV_4902_S108_R1_001.fastq.gz	Y2019	Check_B73xMo17			HN	N	sp2	spb1	1051	1	0	51	rep3	150	246	67	46	33	54	98	61	56	0	0	0	42	83	76	0	0	0	0	0	0	0	0	0	0	0	0	0	0	0	97	35	53	23	27
HAV_4903	HAV_4903_S116_R1_001.fastq.gz	Y2019	C103	Ames 19284	nss	HN	N	sp2	spb1	1054	1	0	54	rep1	63	99	29	26	15	25	32	19	20	17	10	11	10	26	37	15	13	14	0	12	0	0	0	0	0	0	0	10	11	9	0	0	0	0	0
HAV_4904	HAV_4904_S124_R1_001.fastq.gz	Y2019	C103	Ames 19284	nss	HN	N	sp2	spb1	1054	1	0	54	rep2	32	42	16	11	6	9	11	9	11	14	18	11	5	13	19	5	11	0	0	0	0	0	0	0	0	0	0	0	7	5	0	0	0	0	0
HAV_4905	HAV_4905_S69_R1_001.fastq.gz	Y2019	C103	Ames 19284	nss	HN	N	sp2	spb1	1054	1	0	54	rep3	12	27	6	5	3	3	4	2	2	15	10	4	7	6	7	40	55	44	19	26	14	9	18	0	17	15	8	33	34	31	0	0	0	0	0
HAV_4906	HAV_4906_S77_R1_001.fastq.gz	Y2019	F2834T	Ames 27112	mixed	HN	N	sp2	spb1	1056	1	0	56	rep1	33	45	14	9	6	9	7	8	8	2	6	3	6	11	19	0	0	0	0	0	0	0	0	0	0	0	0	0	0	0	39	24	21	0	14
HAV_4907	HAV_4907_S85_R1_001.fastq.gz	Y2019	F2834T	Ames 27112	mixed	HN	N	sp2	spb1	1056	1	0	56	rep2	14	56	11	2	4	20	27	10	5	26	24	21	5	9	13	5	0	10	0	0	0	0	0	0	0	0	0	0	0	0	0	0	0	0	0
HAV_4908	HAV_4908_S93_R1_001.fastq.gz	Y2019	F2834T	Ames 27112	mixed	HN	N	sp2	spb1	1056	1	0	56	rep3	38	69	17	16	12	18	17	22	22	0	0	0	7	17	17	0	7	0	0	10	0	0	0	0	0	0	0	8	10	0	0	0	0	0	0
HAV_4909	HAV_4909_S101_R1_001.fastq.gz	Y2019	Check_B73xMo17			HN	N	sp2	spb2	1057	1	0	57	rep1	56	79	16	15	13	14	25	16	24	29	34	18	10	27	26	10	15	0	0	0	0	0	0	0	0	10	0	0	0	11	0	0	0	0	0
HAV_4910	HAV_4910_S109_R1_001.fastq.gz	Y2019	Check_B73xMo17			HN	N	sp2	spb2	1057	1	0	57	rep2	53	88	15	12	14	15	19	16	16	86	70	43	11	19	28	9	0	0	0	0	0	0	0	0	0	0	0	0	0	7	0	0	0	0	0
HAV_4911	HAV_4911_S117_R1_001.fastq.gz	Y2019	Check_B73xMo17			HN	N	sp2	spb2	1057	1	0	57	rep3	39	71	13	8	10	15	23	14	14	16	18	9	10	22	20	26	23	32	21	21	10	0	9	0	11	20	0	32	21	35	0	0	0	0	0
HAV_4912	HAV_4912_S125_R1_001.fastq.gz	Y2019	KI44	Ames 27260	ts	HN	N	sp2	spb2	1059	1	0	59	rep1	84	121	40	29	21	25	42	40	27	4	4	6	22	26	42	0	0	0	0	0	0	0	0	0	0	0	0	0	0	0	0	0	0	0	0
HAV_4913	HAV_4913_S70_R1_001.fastq.gz	Y2019	KI44	Ames 27260	ts	HN	N	sp2	spb2	1059	1	0	59	rep2	127	170	64	37	25	41	66	50	40	12	8	4	28	53	56	0	0	0	0	0	0	0	0	0	0	0	0	0	0	0	0	0	0	0	0
HAV_4914	HAV_4914_S78_R1_001.fastq.gz	Y2019	KI44	Ames 27260	ts	HN	N	sp2	spb2	1059	1	0	59	rep3	162	250	62	52	26	59	68	53	48	51	55	29	35	80	77	15	16	15	7	13	0	0	0	0	0	11	0	11	9	9	0	0	0	0	0
HAV_4915	HAV_4915_S86_R1_001.fastq.gz	Y2019	NC290A	Ames 27141	nss	HN	N	sp2	spb2	1061	1	0	61	rep1	37	56	19	19	0	0	20	18	13	19	20	13	10	18	28	0	0	0	0	0	0	0	0	0	0	0	0	0	0	0	137	0	0	0	0
HAV_4916	HAV_4916_S94_R1_001.fastq.gz	Y2019	NC290A	Ames 27141	nss	HN	N	sp2	spb2	1061	1	0	61	rep2	60	100	25	19	9	22	25	28	21	21	19	15	14	23	34	12	16	0	0	15	0	0	0	0	0	0	0	0	9	13	0	0	0	0	0
HAV_4917	HAV_4917_S102_R1_001.fastq.gz	Y2019	NC290A	Ames 27141	nss	HN	N	sp2	spb2	1061	1	0	61	rep3	98	177	49	37	19	49	50	43	52	10	16	6	31	55	54	0	0	0	0	0	0	0	0	0	0	0	0	0	0	0	0	0	0	0	0
HAV_4918	HAV_4918_S110_R1_001.fastq.gz	Y2019	NC264	PI 520774	ts	HN	N	sp2	spb2	1064	1	0	64	rep1	91	189	30	22	14	31	42	29	27	7	13	9	20	35	41	10	0	15	0	17	0	0	0	0	0	0	0	11	0	15	0	0	0	0	0
HAV_4919	HAV_4919_S118_R1_001.fastq.gz	Y2019	NC264	PI 520774	ts	HN	N	sp2	spb2	1064	1	0	64	rep2	82	162	37	30	21	37	52	30	25	7	14	1	21	29	43	10	0	6	0	0	0	0	0	0	0	0	0	0	14	0	0	0	0	0	0
HAV_4920	HAV_4920_S126_R1_001.fastq.gz	Y2019	NC264	PI 520774	ts	HN	N	sp2	spb2	1064	1	0	64	rep3	86	121	30	25	18	37	40	26	30	16	25	10	20	30	43	0	0	0	0	0	0	0	0	0	0	0	0	0	0	0	0	0	0	0	0
HAV_4921	HAV_4921_S71_R1_001.fastq.gz	Y2019	Check_B73xMo17			HN	N	sp2	spb2	1066	1	0	66	rep1	0	0	0	0	0	0	0	0	0	0	0	0	0	0	0	0	0	0	0	0	0	0	0	0	0	0	0	0	0	0	0	0	0	0	0
HAV_4922	HAV_4922_S79_R1_001.fastq.gz	Y2019	Check_B73xMo17			HN	N	sp2	spb2	1066	1	0	66	rep2	0	55	0	6	0	0	21	9	15	0	0	0	0	8	11	16	20	0	0	0	0	0	0	0	7	0	0	0	11	0	21	0	0	0	0
HAV_4923	HAV_4923_S87_R1_001.fastq.gz	Y2019	Check_B73xMo17			HN	N	sp2	spb2	1066	1	0	66	rep3	182	384	91	74	38	82	100	78	84	13	10	6	42	108	121	15	7	11	7	0	0	0	0	0	0	12	0	8	15	11	98	0	0	0	0
HAV_4924	HAV_4924_S95_R1_001.fastq.gz	Y2019	NC352	Ames 27172	ts	HN	N	sp2	spb2	1068	1	0	68	rep1	9	16	9	4	0	8	9	9	4	28	35	15	4	10	14	18	26	12	7	12	0	4	9	0	0	5	0	14	24	23	0	0	0	0	0
HAV_4925	HAV_4925_S103_R1_001.fastq.gz	Y2019	NC352	Ames 27172	ts	HN	N	sp2	spb2	1068	1	0	68	rep2	76	125	45	22	19	37	46	32	25	0	0	0	22	44	31	9	13	14	0	0	0	0	0	0	0	0	0	11	13	6	0	0	0	0	0
HAV_4926	HAV_4926_S111_R1_001.fastq.gz	Y2019	NC352	Ames 27172	ts	HN	N	sp2	spb2	1068	1	0	68	rep3	31	26	9	0	0	16	5	12	6	4	7	0	0	7	5	7	9	0	6	0	0	0	0	0	0	0	0	0	0	0	0	0	19	0	0
HAV_4927	HAV_4927_S119_R1_001.fastq.gz	Y2019	NC302	Ames 27147	ts	HN	N	sp2	spb2	1070	1	0	70	rep1	137	203	62	46	33	52	74	51	57	13	10	7	37	56	74	0	0	0	0	0	0	0	0	0	0	0	0	0	0	0	0	0	0	0	0
HAV_4928	HAV_4928_S127_R1_001.fastq.gz	Y2019	NC302	Ames 27147	ts	HN	N	sp2	spb2	1070	1	0	70	rep2	39	61	25	14	10	16	19	23	18	0	0	0	0	25	24	0	0	0	0	0	0	0	0	0	0	0	0	0	0	0	0	0	0	0	0
HAV_4929	HAV_4929_S72_R1_001.fastq.gz	Y2019	NC302	Ames 27147	ts	HN	N	sp2	spb2	1070	1	0	70	rep3	88	135	42	30	15	30	43	18	29	7	12	5	17	33	62	0	0	0	0	0	0	0	0	0	0	0	0	0	0	0	0	0	0	0	0
HAV_4930	HAV_4930_S80_R1_001.fastq.gz	Y2019	W22	NSL 30053	nss	HN	N	sp2	spb3	1071	1	0	71	rep1	320	579	132	107	54	109	149	116	88	0	0	0	63	123	142	0	0	0	0	0	0	0	0	0	0	0	0	0	0	0	0	0	0	0	0
HAV_4931	HAV_4931_S88_R1_001.fastq.gz	Y2019	W22	NSL 30053	nss	HN	N	sp2	spb3	1071	1	0	71	rep2	213	312	83	51	38	74	89	83	73	0	0	0	30	88	85	0	0	0	0	0	0	0	0	0	0	0	0	0	0	0	0	0	0	0	0
HAV_4932	HAV_4932_S96_R1_001.fastq.gz	Y2019	W22	NSL 30053	nss	HN	N	sp2	spb3	1071	1	0	71	rep3	45	55	16	9	7	14	25	10	18	34	44	17	13	13	31	5	10	8	0	9	0	0	0	0	0	9	0	5	10	0	39	0	0	0	0
HAV_4933	HAV_4933_S104_R1_001.fastq.gz	Y2019	Check_B73xMo17			HN	N	sp2	spb3	1073	1	0	73	rep1	104	164	48	41	24	51	44	33	34	2	7	5	38	48	56	8	17	8	0	5	0	0	0	0	0	6	0	0	0	11	0	0	0	0	0
HAV_4934	HAV_4934_S112_R1_001.fastq.gz	Y2019	Check_B73xMo17			HN	N	sp2	spb3	1073	1	0	73	rep2	45	68	16	16	9	14	18	13	15	5	12	2	16	14	18	0	0	0	0	0	0	0	0	0	0	0	0	0	0	0	0	0	0	0	0
HAV_4935	HAV_4935_S120_R1_001.fastq.gz	Y2019	Check_B73xMo17			HN	N	sp2	spb3	1073	1	0	73	rep3	93	143	51	30	12	48	53	42	37	8	13	9	21	48	64	12	12	4	0	0	0	0	0	0	0	9	0	0	13	12	79	0	0	0	0
HAV_4936	HAV_4936_S128_R1_001.fastq.gz	Y2019	Check_B73xMo17			HN	N	sp2	spb3	1075	1	0	75	rep1	76	118	41	21	12	39	54	38	31	12	14	10	16	34	47	12	14	10	0	11	0	0	0	0	0	4	0	6	10	11	0	0	0	0	0
HAV_4937	HAV_4937_S73_R1_001.fastq.gz	Y2019	Check_B73xMo17			HN	N	sp2	spb3	1075	1	0	75	rep2	87	130	40	37	22	41	42	25	32	0	0	0	11	41	47	0	0	0	0	0	0	0	0	0	0	0	0	0	0	8	0	0	0	0	0
HAV_4938	HAV_4938_S81_R1_001.fastq.gz	Y2019	Check_B73xMo17			HN	N	sp2	spb3	1075	1	0	75	rep3	124	178	43	42	15	55	64	46	58	10	20	11	26	67	67	24	25	16	9	25	0	0	7	0	9	6	0	14	14	14	0	0	0	0	0
HAV_4939	HAV_4939_S89_R1_001.fastq.gz	Y2019	W64A	PI 587152	nss	HN	N	sp2	spb3	1078	1	0	78	rep1	10	19	10	12	0	8	5	5	3	15	10	11	4	9	6	0	0	0	0	0	0	0	0	0	0	0	0	0	0	0	0	0	0	0	0
HAV_4940	HAV_4940_S97_R1_001.fastq.gz	Y2019	W64A	PI 587152	nss	HN	N	sp2	spb3	1078	1	0	78	rep2	13	9	4	5	3	5	3	5	2	6	8	0	0	7	2	20	13	0	10	0	0	0	0	0	0	0	0	0	0	12	12	0	13	0	0
HAV_4941	HAV_4941_S105_R1_001.fastq.gz	Y2019	W64A	PI 587152	nss	HN	N	sp2	spb3	1078	1	0	78	rep3	27	65	17	7	9	6	21	15	24	28	29	24	4	15	26	11	13	6	0	0	0	0	0	0	0	0	0	6	17	9	0	0	0	0	0
HAV_4942	HAV_4942_S113_R1_001.fastq.gz	Y2019	Check_B73xMo17			HN	N	sp2	spb3	1079	1	0	79	rep1	112	167	44	26	16	44	54	41	23	4	4	4	16	36	49	50	73	41	27	32	13	11	24	9	10	31	10	26	45	55	0	0	0	0	0
HAV_4943	HAV_4943_S121_R1_001.fastq.gz	Y2019	Check_B73xMo17			HN	N	sp2	spb3	1079	1	0	79	rep2	121	223	68	37	18	39	62	51	56	8	15	8	28	55	76	17	32	9	12	6	8	0	0	0	2	8	0	12	27	23	0	0	0	0	0
HAV_4944	HAV_4944_S129_R1_001.fastq.gz	Y2019	Check_B73xMo17			HN	N	sp2	spb3	1079	1	0	79	rep3	52	88	20	16	10	17	20	16	12	16	10	9	12	30	32	17	29	17	11	27	6	11	7	9	0	14	9	17	21	26	0	0	0	0	0
HAV_4945	HAV_4945_S74_R1_001.fastq.gz	Y2019	NC370	Ames 27181	ts	HN	N	sp2	spb3	1081	1	0	81	rep1	28	61	17	11	4	15	16	7	8	11	7	5	9	13	23	0	0	0	0	0	0	0	0	0	0	0	0	0	0	0	0	0	0	0	0
HAV_4946	HAV_4946_S82_R1_001.fastq.gz	Y2019	NC370	Ames 27181	ts	HN	N	sp2	spb3	1081	1	0	81	rep2	38	47	17	0	0	0	0	16	0	0	0	0	0	0	33	0	0	0	0	0	0	0	0	0	0	0	0	0	0	0	0	0	0	0	0
HAV_4947	HAV_4947_S90_R1_001.fastq.gz	Y2019	NC370	Ames 27181	ts	HN	N	sp2	spb3	1081	1	0	81	rep3	42	66	19	15	13	18	22	22	23	7	9	6	11	18	33	0	0	0	0	0	0	0	0	0	0	0	0	0	0	8	0	0	0	0	0
HAV_4948	HAV_4948_S98_R1_001.fastq.gz	Y2019	SA24	PI 686065	popcorn	HN	N	sp2	spb3	1083	1	0	83	rep1	12	31	16	9	4	13	7	0	5	11	0	4	9	14	11	0	0	0	0	0	0	0	0	0	0	0	0	0	0	0	0	0	0	0	0
HAV_4949	HAV_4949_S106_R1_001.fastq.gz	Y2019	SA24	PI 686065	popcorn	HN	N	sp2	spb3	1083	1	0	83	rep2	26	48	19	12	0	8	20	17	15	7	7	6	17	22	19	0	0	0	0	0	0	0	0	0	0	0	0	0	0	0	0	0	0	0	0
HAV_4950	HAV_4950_S114_R1_001.fastq.gz	Y2019	SA24	PI 686065	popcorn	HN	N	sp2	spb3	1083	1	0	83	rep3	94	138	40	28	24	27	45	39	34	23	24	8	28	36	51	0	5	0	0	0	0	0	0	0	0	0	0	0	0	0	0	0	0	0	0
HAV_4951	HAV_4951_S122_R1_001.fastq.gz	Y2019	CM174	Ames 19316	ss	HN	N	sp1	spb1	1102	1	1	02	rep1	125	183	47	27	12	47	36	37	38	3	6	8	20	45	58	15	26	15	8	5	0	0	0	0	0	10	0	16	15	18	48	0	0	0	0
HAV_4952	HAV_4952_S130_R1_001.fastq.gz	Y2019	CM174	Ames 19316	ss	HN	N	sp1	spb1	1102	1	1	02	rep2	204	325	71	55	33	69	97	63	52	12	16	11	31	75	72	11	28	14	0	12	0	0	0	0	0	7	0	17	11	12	0	0	0	0	0
HAV_4953	HAV_4953_S1_R1_001.fastq.gz	Y2019	CM174	Ames 19316	ss	HN	N	sp1	spb1	1102	1	1	02	rep3	308	289	205	220	193	210	182	122	190	6	8	8	194	164	178	0	0	0	0	0	0	0	0	0	0	0	0	0	0	0	0	0	0	68	0
HAV_4954	HAV_4954_S10_R1_001.fastq.gz	Y2019	B75	PI 608774	nss	HN	N	sp1	spb1	1103	1	1	03	rep1	25	29	9	11	15	13	8	12	15	6	6	8	19	8	15	0	0	0	0	0	0	0	0	0	0	0	0	0	0	0	0	0	0	0	0
HAV_4955	HAV_4955_S19_R1_001.fastq.gz	Y2019	B75	PI 608774	nss	HN	N	sp1	spb1	1103	1	1	03	rep2	93	81	47	58	43	58	44	36	47	55	47	77	52	36	45	19	19	15	9	0	12	20	17	19	18	17	15	19	13	11	0	0	0	0	0
HAV_4956	HAV_4956_S28_R1_001.fastq.gz	Y2019	B75	PI 608774	nss	HN	N	sp1	spb1	1103	1	1	03	rep3	63	69	28	58	36	36	37	34	43	16	9	17	44	23	35	0	0	0	0	0	0	0	0	0	0	0	0	0	0	0	0	0	0	0	0
HAV_4957	HAV_4957_S37_R1_001.fastq.gz	Y2019	A188	Ames 22443	nss	HN	N	sp1	spb1	1106	1	1	06	rep1	45	28	20	22	24	39	18	30	18	3	0	3	29	23	26	0	0	0	0	0	0	0	0	0	0	0	0	0	0	0	19	15	14	52	19
HAV_4958	HAV_4958_S45_R1_001.fastq.gz	Y2019	A188	Ames 22443	nss	HN	N	sp1	spb1	1106	1	1	06	rep2	15	18	14	14	10	7	10	2	8	20	27	35	13	10	12	13	0	0	11	0	0	12	0	12	9	0	12	0	0	0	0	52	0	22	0
HAV_4959	HAV_4959_S52_R1_001.fastq.gz	Y2019	A188	Ames 22443	nss	HN	N	sp1	spb1	1106	1	1	06	rep3	204	177	131	159	133	159	133	107	112	16	17	14	129	107	123	39	24	33	35	22	17	33	32	37	19	37	27	38	21	24	36	48	54	67	57
HAV_4960	HAV_4960_S60_R1_001.fastq.gz	Y2019	B103	PI 594046	nss	HN	N	sp1	spb1	1108	1	1	08	rep1	114	77	63	75	63	76	59	51	60	18	12	14	79	46	62	0	0	0	0	0	0	0	0	0	0	0	0	0	0	0	0	0	0	0	52
HAV_4961	HAV_4961_S1_R1_001.fastq.gz	Y2019	B103	PI 594046	nss	HN	N	sp1	spb1	1108	1	1	08	rep2	100	88	56	76	59	88	57	46	47	0	0	0	67	38	54	0	0	0	0	0	0	0	0	0	0	0	0	0	0	0	225	206	247	336	284
HAV_4962	HAV_4962_S11_R1_001.fastq.gz	Y2019	B103	PI 594046	nss	HN	N	sp1	spb1	1108	1	1	08	rep3	32	40	19	26	28	27	21	15	19	4	4	3	18	21	22	0	0	0	0	0	0	0	0	0	0	0	0	0	0	0	0	0	0	0	50
HAV_4963	HAV_4963_S20_R1_001.fastq.gz	Y2019	Check_B73xMo17			HN	N	sp1	spb1	1110	1	1	10	rep1	51	49	37	49	32	39	38	22	29	2	6	4	34	15	32	11	18	18	12	0	15	0	0	10	0	15	0	20	0	16	23	16	0	48	19
HAV_4964	HAV_4964_S29_R1_001.fastq.gz	Y2019	Check_B73xMo17			HN	N	sp1	spb1	1110	1	1	10	rep2	0	23	0	0	0	65	0	0	37	0	0	0	0	0	0	0	0	0	0	0	0	0	0	0	0	0	0	0	0	0	0	0	0	0	86
HAV_4965	HAV_4965_S38_R1_001.fastq.gz	Y2019	Check_B73xMo17			HN	N	sp1	spb1	1110	1	1	10	rep3	26	0	17	0	0	39	0	0	0	0	0	2	16	0	0	0	0	0	0	0	0	0	0	0	0	32	0	0	0	0	25	28	32	39	41
HAV_4966	HAV_4966_S46_R1_001.fastq.gz	Y2019	A619	PI 587139	nss	HN	N	sp1	spb1	1111	1	1	11	rep1	107	132	78	110	98	94	98	66	69	18	14	11	87	77	91	15	17	13	20	10	10	32	17	21	15	15	19	14	18	11	0	43	0	0	48
HAV_4967	HAV_4967_S53_R1_001.fastq.gz	Y2019	A619	PI 587139	nss	HN	N	sp1	spb1	1111	1	1	11	rep2	22	26	19	28	16	22	17	16	8	23	19	21	15	13	18	0	0	0	0	0	0	0	0	0	0	0	0	0	0	0	0	0	53	34	0
HAV_4968	HAV_4968_S61_R1_001.fastq.gz	Y2019	A619	PI 587139	nss	HN	N	sp1	spb1	1111	1	1	11	rep3	70	40	42	57	45	32	49	40	55	78	65	81	63	35	45	0	0	11	0	0	0	0	7	0	13	0	17	9	0	10	0	0	0	0	0
HAV_4969	HAV_4969_S3_R1_001.fastq.gz	Y2019	C49A	Ames 27067	nss	HN	N	sp1	spb1	1113	1	1	13	rep1	23	22	4	21	17	19	22	4	12	38	36	44	21	15	24	0	0	0	0	0	0	0	0	0	0	0	0	0	0	0	29	44	33	31	32
HAV_4970	HAV_4970_S12_R1_001.fastq.gz	Y2019	C49A	Ames 27067	nss	HN	N	sp1	spb1	1113	1	1	13	rep2	10	10	6	4	4	12	7	3	4	46	48	78	10	6	9	0	0	0	0	0	0	0	0	0	0	0	0	0	0	0	183	172	158	247	206
HAV_4971	HAV_4971_S21_R1_001.fastq.gz	Y2019	C49A	Ames 27067	nss	HN	N	sp1	spb1	1113	1	1	13	rep3	56	41	23	39	36	28	22	22	30	205	164	217	27	19	31	0	0	0	0	0	0	0	0	0	0	0	0	0	0	0	0	0	0	55	0
HAV_4972	HAV_4972_S30_R1_001.fastq.gz	Y2019	MEF156-55-2	Ames 27135	nss	HN	N	sp1	spb2	1116	1	1	16	rep1	107	88	80	99	63	75	87	54	70	5	3	6	82	49	72	0	0	0	0	0	0	0	0	0	0	0	0	0	0	0	0	0	0	0	39
HAV_4973	HAV_4973_S39_R1_001.fastq.gz	Y2019	MEF156-55-2	Ames 27135	nss	HN	N	sp1	spb2	1116	1	1	16	rep2	17	15	10	17	17	10	10	6	6	25	16	23	15	9	10	0	7	8	18	0	0	15	8	15	12	10	19	5	5	16	0	0	0	0	41
HAV_4975	HAV_4975_S54_R1_001.fastq.gz	Y2019	CM37	Ames 20190	nss	HN	N	sp1	spb2	1118	1	1	18	rep1	36	41	36	41	28	35	31	23	29	96	80	110	41	19	26	0	0	0	0	0	0	0	0	10	0	0	0	0	0	0	0	0	0	0	18
HAV_4976	HAV_4976_S62_R1_001.fastq.gz	Y2019	CM37	Ames 20190	nss	HN	N	sp1	spb2	1118	1	1	18	rep2	137	106	83	92	84	103	91	58	76	6	7	5	84	47	85	0	0	0	0	0	0	0	0	0	0	0	0	0	0	0	39	38	31	33	39
HAV_4977	HAV_4977_S4_R1_001.fastq.gz	Y2019	CM37	Ames 20190	nss	HN	N	sp1	spb2	1118	1	1	18	rep3	44	41	37	52	42	42	39	22	33	60	57	72	45	35	32	0	0	0	6	0	0	0	0	18	0	0	11	0	0	0	0	0	0	0	37
HAV_4978	HAV_4978_S13_R1_001.fastq.gz	Y2019	IA5125	PI 587135	sweet	HN	N	sp1	spb2	1119	1	1	19	rep1	16	14	12	26	13	18	13	0	11	0	0	0	18	7	11	0	0	0	0	0	0	0	0	0	0	0	0	0	0	0	0	0	0	0	0
HAV_4979	HAV_4979_S22_R1_001.fastq.gz	Y2019	IA5125	PI 587135	sweet	HN	N	sp1	spb2	1119	1	1	19	rep2	41	40	34	32	24	25	27	26	38	18	25	19	27	24	26	8	0	0	19	0	0	0	0	19	0	11	0	0	0	0	40	33	30	30	33
HAV_4980	HAV_4980_S31_R1_001.fastq.gz	Y2019	IA5125	PI 587135	sweet	HN	N	sp1	spb2	1119	1	1	19	rep3	17	16	10	15	14	11	11	10	10	9	7	7	11	5	13	0	0	0	0	0	0	0	0	0	0	0	0	0	0	0	0	0	0	0	0
HAV_4981	HAV_4981_S40_R1_001.fastq.gz	Y2019	CMV3	Ames 27104	nss	HN	N	sp1	spb2	1121	1	1	21	rep1	389	373	267	339	278	307	307	183	236	12	4	6	281	208	265	0	0	0	0	0	0	0	0	0	0	0	0	0	0	0	0	0	0	0	0
HAV_4982	HAV_4982_S47_R1_001.fastq.gz	Y2019	CMV3	Ames 27104	nss	HN	N	sp1	spb2	1121	1	1	21	rep2	154	141	100	131	92	112	97	90	76	0	0	0	125	71	110	0	0	0	0	0	0	0	0	0	0	0	0	0	0	0	71	67	60	116	86
HAV_4983	HAV_4983_S55_R1_001.fastq.gz	Y2019	CMV3	Ames 27104	nss	HN	N	sp1	spb2	1121	1	1	21	rep3	168	161	124	163	116	147	121	93	115	16	11	11	128	109	116	0	0	0	0	0	0	0	0	0	0	0	0	0	0	0	18	20	19	29	34
HAV_4984	HAV_4984_S63_R1_001.fastq.gz	Y2019	IDS91	PI 686063	popcorn	HN	N	sp1	spb2	1123	1	1	23	rep1	28	17	12	20	15	24	13	10	10	36	39	50	14	14	14	16	10	15	27	14	0	15	12	27	19	10	20	12	9	17	57	0	0	34	0
HAV_4985	HAV_4985_S5_R1_001.fastq.gz	Y2019	IDS91	PI 686063	popcorn	HN	N	sp1	spb2	1123	1	1	23	rep2	169	193	106	163	117	151	134	72	114	63	47	56	122	81	118	0	0	13	0	12	0	13	14	15	12	0	0	14	0	0	0	0	0	0	0
HAV_4986	HAV_4986_S14_R1_001.fastq.gz	Y2019	IDS91	PI 686063	popcorn	HN	N	sp1	spb2	1123	1	1	23	rep3	319	332	199	313	186	242	206	149	187	9	7	11	235	159	241	0	0	0	0	0	0	0	0	0	0	0	0	0	0	0	0	0	0	0	0
HAV_4987	HAV_4987_S23_R1_001.fastq.gz	Y2019	CO255	Ames 27107	mixed	HN	N	sp1	spb2	1126	1	1	26	rep1	109	119	77	95	77	88	95	61	76	25	12	23	60	69	93	0	0	0	0	0	0	0	0	0	0	0	0	0	0	0	0	0	0	0	0
HAV_4988	HAV_4988_S32_R1_001.fastq.gz	Y2019	CO255	Ames 27107	mixed	HN	N	sp1	spb2	1126	1	1	26	rep2	0	0	0	28	20	12	27	0	0	0	0	0	0	0	17	0	0	0	0	0	0	0	0	0	0	0	0	0	0	0	0	0	0	0	0
HAV_4989	HAV_4989_S41_R1_001.fastq.gz	Y2019	CO255	Ames 27107	mixed	HN	N	sp1	spb2	1126	1	1	26	rep3	71	50	45	67	48	66	60	44	51	97	75	104	59	55	63	0	0	0	0	0	0	0	0	0	0	0	0	0	0	0	0	0	0	0	0
HAV_4990	HAV_4990_S48_R1_001.fastq.gz	Y2019	CM7	Ames 27070	nss	HN	N	sp1	spb2	1127	1	1	27	rep1	17	18	10	6	7	14	10	9	15	28	29	33	10	11	16	0	0	0	0	0	0	0	0	0	0	0	0	0	0	0	137	87	127	175	149
HAV_4991	HAV_4991_S56_R1_001.fastq.gz	Y2019	CM7	Ames 27070	nss	HN	N	sp1	spb2	1127	1	1	27	rep2	22	25	20	22	20	22	16	8	19	5	6	8	22	12	22	0	0	0	0	0	0	0	0	0	0	0	0	0	0	0	57	66	65	90	79
HAV_4992	HAV_4992_S64_R1_001.fastq.gz	Y2019	CM7	Ames 27070	nss	HN	N	sp1	spb2	1127	1	1	27	rep3	121	109	72	71	78	89	67	60	80	17	12	17	89	43	63	0	0	0	0	0	0	0	0	0	0	0	0	0	0	0	13	41	17	26	18
HAV_4993	HAV_4993_S6_R1_001.fastq.gz	Y2019	NC316	Ames 27154		HN	N	sp1	spb3	1130	1	1	30	rep1	99	79	51	71	72	51	50	46	64	11	9	10	92	29	53	0	0	0	0	0	0	0	0	0	0	0	0	0	0	0	0	0	0	0	0
HAV_4994	HAV_4994_S15_R1_001.fastq.gz	Y2019	NC316	Ames 27154		HN	N	sp1	spb3	1130	1	1	30	rep2	118	111	79	100	74	97	76	68	68	0	0	0	78	64	75	0	0	0	0	0	0	0	0	0	0	0	0	0	0	0	0	0	0	0	0
HAV_4995	HAV_4995_S24_R1_001.fastq.gz	Y2019	NC316	Ames 27154		HN	N	sp1	spb3	1130	1	1	30	rep3	0	0	0	0	0	0	0	0	0	0	0	0	0	53	0	0	0	0	0	0	0	0	0	0	0	0	0	0	0	0	0	0	0	209	0
HAV_4996	HAV_4996_S33_R1_001.fastq.gz	Y2019	Check_B73xMo17			HN	N	sp1	spb3	1132	1	1	32	rep1	19	26	17	19	18	11	20	0	13	5	0	12	16	9	13	0	0	0	0	0	0	0	0	0	0	0	0	0	0	0	0	0	0	0	0
HAV_4997	HAV_4997_S42_R1_001.fastq.gz	Y2019	Check_B73xMo17			HN	N	sp1	spb3	1132	1	1	32	rep2	51	50	32	61	33	36	35	24	34	9	7	2	49	32	35	0	0	0	0	0	0	0	0	0	0	0	0	0	0	0	0	0	0	0	0
HAV_4998	HAV_4998_S49_R1_001.fastq.gz	Y2019	Check_B73xMo17			HN	N	sp1	spb3	1132	1	1	32	rep3	19	16	15	13	13	17	15	13	14	0	0	0	19	11	18	0	0	0	0	0	0	0	0	0	0	0	0	0	0	0	18	21	29	22	27
HAV_4999	HAV_4999_S57_R1_001.fastq.gz	Y2019	W153R	PI 587154	nss	HN	N	sp1	spb3	1134	1	1	34	rep1	184	160	114	146	119	136	135	96	110	0	0	0	121	80	105	0	0	0	0	0	0	0	0	0	0	0	0	0	0	0	0	0	0	34	17
HAV_5000	HAV_5000_S65_R1_001.fastq.gz	Y2019	W153R	PI 587154	nss	HN	N	sp1	spb3	1134	1	1	34	rep2	123	102	75	94	69	81	89	44	77	0	0	0	81	56	71	0	0	0	0	0	0	0	0	0	0	0	0	0	0	0	16	23	24	29	31
HAV_5001	HAV_5001_S7_R1_001.fastq.gz	Y2019	W153R	PI 587154	nss	HN	N	sp1	spb3	1134	1	1	34	rep3	25	21	12	19	16	15	23	15	11	0	0	0	15	13	11	0	0	0	0	0	0	0	0	0	0	0	0	0	0	0	47	51	54	89	61
HAV_5002	HAV_5002_S16_R1_001.fastq.gz	Y2019	NC332	Ames 27162	ts	HN	N	sp1	spb3	1136	1	1	36	rep1	27	21	15	19	19	15	19	15	11	13	18	21	24	17	14	0	0	0	0	0	0	0	0	0	0	0	0	0	0	0	0	0	0	0	81
HAV_5003	HAV_5003_S25_R1_001.fastq.gz	Y2019	NC332	Ames 27162	ts	HN	N	sp1	spb3	1136	1	1	36	rep2	14	19	14	16	12	19	19	8	15	9	5	17	17	7	17	0	0	0	0	0	0	0	0	0	0	0	0	0	0	0	53	31	43	57	41
HAV_5004	HAV_5004_S34_R1_001.fastq.gz	Y2019	NC332	Ames 27162	ts	HN	N	sp1	spb3	1136	1	1	36	rep3	85	74	75	67	49	67	65	41	44	6	14	8	54	48	70	0	0	0	0	0	0	0	0	0	0	0	0	0	0	0	0	0	52	0	0
HAV_5005	HAV_5005_S43_R1_001.fastq.gz	Y2019	OH43	Ames 19288	nss	HN	N	sp1	spb3	1137	1	1	37	rep1	8	17	13	11	13	22	12	9	8	25	18	26	12	9	14	0	0	0	0	0	0	0	0	0	0	0	0	0	0	0	0	0	0	0	61
HAV_5006	HAV_5006_S50_R1_001.fastq.gz	Y2019	OH43	Ames 19288	nss	HN	N	sp1	spb3	1137	1	1	37	rep2	42	37	27	38	20	47	22	21	28	14	13	23	27	23	30	0	0	0	0	0	0	0	0	0	0	0	0	0	0	0	0	0	0	50	39
HAV_5007	HAV_5007_S58_R1_001.fastq.gz	Y2019	OH43	Ames 19288	nss	HN	N	sp1	spb3	1137	1	1	37	rep3	62	56	50	47	35	45	43	29	31	11	15	17	70	34	42	0	0	0	0	0	0	0	0	7	0	0	0	0	0	0	0	0	0	0	0
HAV_5008	HAV_5008_S66_R1_001.fastq.gz	Y2019	Check_B73xMo17			HN	N	sp1	spb3	1139	1	1	39	rep1	11	15	8	15	7	10	8	14	7	20	24	27	8	9	7	0	0	0	0	0	0	0	0	0	0	0	0	0	0	0	0	0	0	0	0
HAV_5009	HAV_5009_S8_R1_001.fastq.gz	Y2019	Check_B73xMo17			HN	N	sp1	spb3	1139	1	1	39	rep2	50	47	23	40	32	47	38	24	33	37	36	63	38	17	35	0	0	0	0	0	0	0	0	0	0	0	0	0	0	0	19	32	25	24	23
HAV_5010	HAV_5010_S17_R1_001.fastq.gz	Y2019	Check_B73xMo17			HN	N	sp1	spb3	1139	1	1	39	rep3	19	17	12	20	10	8	16	12	22	39	37	38	11	11	12	0	0	0	0	0	0	0	0	0	0	0	0	0	0	0	0	0	0	0	0
HAV_5011	HAV_5011_S26_R1_001.fastq.gz	Y2019	R168	Ames 19326	nss	HN	N	sp1	spb3	1142	1	1	42	rep1	23	24	11	16	19	14	17	14	26	11	10	10	21	7	20	0	0	0	0	0	0	0	0	0	0	0	0	0	0	0	24	16	21	24	18
HAV_5012	HAV_5012_S35_R1_001.fastq.gz	Y2019	R168	Ames 19326	nss	HN	N	sp1	spb3	1142	1	1	42	rep2	11	10	3	7	5	6	4	7	7	43	33	35	9	5	9	0	0	0	0	0	0	0	0	0	0	0	0	0	0	0	33	21	37	38	45
HAV_5013	HAV_5013_S44_R1_001.fastq.gz	Y2019	R168	Ames 19326	nss	HN	N	sp1	spb3	1142	1	1	42	rep3	46	47	32	46	34	30	40	22	31	54	46	73	45	35	31	0	0	0	0	0	0	0	0	0	0	0	0	0	0	0	0	0	63	0	0
HAV_5014	HAV_5014_S51_R1_001.fastq.gz	Y2019	CML220	Ames 27087	ts	HN	N	sp2	spb1	1143	1	1	43	rep1	13	18	12	14	9	13	11	5	7	50	39	44	12	3	12	0	0	0	0	0	0	0	0	0	0	0	0	0	0	0	0	0	0	0	0
HAV_5015	HAV_5015_S59_R1_001.fastq.gz	Y2019	CML220	Ames 27087	ts	HN	N	sp2	spb1	1143	1	1	43	rep2	9	14	13	10	8	8	13	7	8	30	21	25	10	4	7	0	0	0	0	0	0	0	0	0	0	0	0	0	0	0	16	21	14	17	41
HAV_5016	HAV_5016_S67_R1_001.fastq.gz	Y2019	CML220	Ames 27087	ts	HN	N	sp2	spb1	1143	1	1	43	rep3	13	11	9	13	3	5	6	9	8	104	69	118	7	6	10	0	0	0	0	0	0	0	0	0	0	0	0	0	0	0	0	0	0	0	0
HAV_5017	HAV_5017_S68_R1_001.fastq.gz	Y2019	B79	PI 608766	mixed	HN	N	sp2	spb1	1145	1	1	45	rep1	13	11	7	11	14	12	15	15	10	17	9	12	12	8	12	0	0	0	0	0	0	0	0	0	0	0	0	0	0	0	21	25	38	28	24
HAV_5018	HAV_5018_S76_R1_001.fastq.gz	Y2019	B79	PI 608766	mixed	HN	N	sp2	spb1	1145	1	1	45	rep2	108	95	54	86	67	76	87	51	65	44	16	27	64	42	62	0	0	0	0	0	0	0	0	0	0	0	0	0	0	0	26	34	33	41	29
HAV_5019	HAV_5019_S84_R1_001.fastq.gz	Y2019	B79	PI 608766	mixed	HN	N	sp2	spb1	1145	1	1	45	rep3	9	10	7	11	12	12	8	5	8	39	26	43	8	6	5	0	0	0	0	0	0	0	0	0	0	0	0	0	0	0	70	58	80	88	76
HAV_5020	HAV_5020_S2_R1_001.fastq.gz	Y2019	HP301	PI 587131	popcorn	HN	N	sp2	spb1	1148	1	1	48	rep1	42	43	37	56	33	29	29	17	29	17	14	17	26	27	26	0	0	0	0	0	0	0	0	0	0	0	0	0	0	0	0	0	49	0	0
HAV_5021	HAV_5021_S100_R1_001.fastq.gz	Y2019	HP301	PI 587131	popcorn	HN	N	sp2	spb1	1148	1	1	48	rep2	13	14	10	17	11	19	18	8	12	68	53	71	8	10	19	0	0	0	0	0	0	0	0	0	0	0	0	0	0	0	0	0	0	0	0
HAV_5022	HAV_5022_S108_R1_001.fastq.gz	Y2019	HP301	PI 587131	popcorn	HN	N	sp2	spb1	1148	1	1	48	rep3	30	44	26	37	25	49	29	25	27	176	127	228	24	27	31	0	0	0	11	0	10	0	20	0	0	0	0	0	0	0	0	0	0	0	0
HAV_5023	HAV_5023_S116_R1_001.fastq.gz	Y2019	IL677A	Ames 27120	sweet	HN	N	sp2	spb1	1149	1	1	49	rep1	14	30	12	18	10	22	16	0	17	14	0	5	9	15	15	0	0	0	0	0	0	0	0	0	0	0	0	0	0	0	0	0	0	0	83
HAV_5024	HAV_5024_S124_R1_001.fastq.gz	Y2019	IL677A	Ames 27120	sweet	HN	N	sp2	spb1	1149	1	1	49	rep2	12	10	10	8	13	8	8	0	6	6	0	10	8	16	5	0	0	0	0	0	0	0	0	0	0	0	0	0	0	0	0	0	0	0	0
HAV_5025	HAV_5025_S69_R1_001.fastq.gz	Y2019	IL677A	Ames 27120	sweet	HN	N	sp2	spb1	1149	1	1	49	rep3	230	200	147	165	135	160	137	106	124	6	2	17	138	81	149	0	0	0	0	0	0	0	0	0	0	0	0	0	0	0	28	20	18	23	24
HAV_5026	HAV_5026_S77_R1_001.fastq.gz	Y2019	CML154Q	Ames 27083	ts	HN	N	sp2	spb1	1152	1	1	52	rep1	24	27	22	28	21	25	25	16	23	21	17	27	18	15	24	0	0	0	0	0	0	0	0	0	0	0	0	0	0	0	21	30	18	22	19
HAV_5027	HAV_5027_S85_R1_001.fastq.gz	Y2019	CML154Q	Ames 27083	ts	HN	N	sp2	spb1	1152	1	1	52	rep2	48	39	45	47	28	37	35	19	35	51	46	48	35	25	42	7	14	15	16	0	0	0	0	0	0	0	0	20	8	17	0	0	71	0	0
HAV_5028	HAV_5028_S3_R1_001.fastq.gz	Y2019	CML154Q	Ames 27083	ts	HN	N	sp2	spb1	1152	1	1	52	rep3	22	25	22	35	18	23	33	23	25	87	89	114	29	21	14	0	0	0	0	0	0	0	0	0	0	0	0	0	0	0	0	0	0	0	0
HAV_5029	HAV_5029_S101_R1_001.fastq.gz	Y2019	B104	PI 594047	mixed	HN	N	sp2	spb1	1153	1	1	53	rep1	28	31	23	32	20	32	22	20	28	88	64	114	24	15	23	15	15	14	19	6	9	21	23	16	18	10	18	15	14	12	0	0	0	87	0
HAV_5030	HAV_5030_S109_R1_001.fastq.gz	Y2019	B104	PI 594047	mixed	HN	N	sp2	spb1	1153	1	1	53	rep2	13	8	12	11	8	12	6	3	5	42	32	53	12	15	10	0	0	0	0	0	0	0	0	0	0	0	0	0	0	0	0	0	0	56	0
HAV_5031	HAV_5031_S117_R1_001.fastq.gz	Y2019	B104	PI 594047	mixed	HN	N	sp2	spb1	1153	1	1	53	rep3	36	41	31	43	42	23	30	18	23	59	48	72	35	19	23	0	0	0	0	0	0	0	0	0	0	0	0	0	0	0	0	0	0	0	0
HAV_5032	HAV_5032_S125_R1_001.fastq.gz	Y2019	H95	Ames 19319	nss	HN	N	sp2	spb1	1155	1	1	55	rep1	52	43	37	35	41	44	28	32	25	40	24	30	43	23	33	37	30	23	43	22	26	30	44	54	38	32	38	35	22	30	0	0	0	0	0
HAV_5033	HAV_5033_S70_R1_001.fastq.gz	Y2019	H95	Ames 19319	nss	HN	N	sp2	spb1	1155	1	1	55	rep2	43	45	30	37	29	41	29	28	25	8	4	6	36	21	30	0	0	0	0	0	0	0	0	0	0	0	0	0	0	0	0	28	19	23	25
HAV_5034	HAV_5034_S78_R1_001.fastq.gz	Y2019	H95	Ames 19319	nss	HN	N	sp2	spb1	1155	1	1	55	rep3	38	53	35	34	22	35	31	28	24	28	24	36	33	31	32	18	0	10	26	15	18	20	16	24	12	0	9	17	19	27	0	73	0	0	0
HAV_5035	HAV_5035_S86_R1_001.fastq.gz	Y2019	NC230	Ames 12731	nss	HN	N	sp2	spb2	1157	1	1	57	rep1	19	18	22	19	19	21	14	14	14	38	39	61	11	12	16	0	0	0	0	0	0	0	0	0	0	0	0	0	0	0	83	99	99	119	126
HAV_5036	HAV_5036_S94_R1_001.fastq.gz	Y2019	NC230	Ames 12731	nss	HN	N	sp2	spb2	1157	1	1	57	rep2	0	0	0	0	0	0	0	0	0	0	0	0	0	0	0	0	0	0	0	0	0	0	0	0	0	0	0	0	0	0	0	0	0	0	0
HAV_5037	HAV_5037_S102_R1_001.fastq.gz	Y2019	NC230	Ames 12731	nss	HN	N	sp2	spb2	1157	1	1	57	rep3	68	71	49	68	51	53	49	29	47	18	15	31	45	39	53	9	0	0	0	0	0	0	0	13	0	0	0	9	0	0	0	0	0	0	0
HAV_5038	HAV_5038_S110_R1_001.fastq.gz	Y2019	NC236	Ames 12734	nss	HN	N	sp2	spb2	1159	1	1	59	rep1	281	265	201	235	196	256	220	147	173	105	68	92	230	158	198	0	0	0	0	0	0	0	0	0	0	0	0	0	0	0	0	0	0	0	0
HAV_5039	HAV_5039_S118_R1_001.fastq.gz	Y2019	NC236	Ames 12734	nss	HN	N	sp2	spb2	1159	1	1	59	rep2	128	105	67	95	75	108	73	59	76	8	6	12	86	59	67	0	0	0	0	0	0	0	0	0	0	0	0	0	0	0	0	0	0	0	0
HAV_5040	HAV_5040_S126_R1_001.fastq.gz	Y2019	NC236	Ames 12734	nss	HN	N	sp2	spb2	1159	1	1	59	rep3	52	55	38	51	40	59	45	36	30	27	18	20	49	33	39	0	0	0	0	0	0	0	0	0	0	0	0	0	0	0	0	0	0	0	66
HAV_5041	HAV_5041_S71_R1_001.fastq.gz	Y2019	N6	Ames 27137	nss	HN	N	sp2	spb2	1162	1	1	62	rep1	48	42	20	51	36	38	29	21	23	22	16	21	38	26	36	0	0	0	0	0	0	0	0	0	0	0	0	0	0	0	36	28	25	34	22
HAV_5042	HAV_5042_S79_R1_001.fastq.gz	Y2019	N6	Ames 27137	nss	HN	N	sp2	spb2	1162	1	1	62	rep2	31	37	20	27	19	24	26	15	22	33	34	47	29	14	13	11	14	9	20	0	9	14	12	22	21	11	7	18	0	22	0	0	0	0	0
HAV_5043	HAV_5043_S87_R1_001.fastq.gz	Y2019	N6	Ames 27137	nss	HN	N	sp2	spb2	1162	1	1	62	rep3	16	22	15	12	7	12	16	0	14	2	0	2	19	8	14	0	0	0	0	0	0	0	0	0	0	0	0	0	0	0	34	28	30	64	39
HAV_5044	HAV_5044_S95_R1_001.fastq.gz	Y2019	N7A	Ames 28366	mixed	HN	N	sp2	spb2	1163	1	1	63	rep1	150	160	130	147	96	134	108	83	92	57	51	95	125	61	89	0	0	0	0	0	0	0	0	0	0	0	0	0	0	0	0	0	25	14	0
HAV_5045	HAV_5045_S103_R1_001.fastq.gz	Y2019	N7A	Ames 28366	mixed	HN	N	sp2	spb2	1163	1	1	63	rep2	89	86	52	61	45	68	51	31	49	34	31	50	52	39	46	14	11	12	14	0	10	17	24	23	16	14	18	27	14	12	42	30	43	63	55
HAV_5046	HAV_5046_S111_R1_001.fastq.gz	Y2019	N7A	Ames 28366	mixed	HN	N	sp2	spb2	1163	1	1	63	rep3	186	134	117	158	132	150	133	69	125	111	93	118	132	88	150	0	0	0	0	0	0	0	0	0	0	0	0	0	0	0	45	37	53	63	72
HAV_5047	HAV_5047_S119_R1_001.fastq.gz	Y2019	NC336	Ames 27164	ts	HN	N	sp2	spb2	1165	1	1	65	rep1	39	49	35	55	33	49	30	15	33	13	8	10	32	27	37	0	0	0	0	0	0	0	0	0	0	0	0	0	0	0	0	0	0	0	0
HAV_5048	HAV_5048_S127_R1_001.fastq.gz	Y2019	NC336	Ames 27164	ts	HN	N	sp2	spb2	1165	1	1	65	rep2	44	40	24	42	25	28	18	20	29	19	14	23	23	25	25	0	0	0	0	0	0	0	0	0	0	0	0	0	0	0	0	0	0	0	0
HAV_5049	HAV_5049_S72_R1_001.fastq.gz	Y2019	NC336	Ames 27164	ts	HN	N	sp2	spb2	1165	1	1	65	rep3	83	78	67	84	63	66	56	44	52	2	5	6	68	44	68	0	0	0	0	0	0	0	0	0	0	0	0	0	0	0	0	0	0	0	0
HAV_5050	HAV_5050_S80_R1_001.fastq.gz	Y2019	NC324	Ames 27158	ss	HN	N	sp2	spb2	1167	1	1	67	rep1	69	48	47	64	44	33	42	22	41	5	5	8	52	39	47	23	17	19	25	0	12	26	17	25	18	14	21	14	15	14	43	53	44	45	43
HAV_5051	HAV_5051_S88_R1_001.fastq.gz	Y2019	NC324	Ames 27158	ss	HN	N	sp2	spb2	1167	1	1	67	rep2	20	13	17	22	20	20	16	6	9	29	12	30	18	10	16	0	0	0	0	0	0	0	0	0	0	0	0	0	0	0	16	16	24	22	22
HAV_5052	HAV_5052_S96_R1_001.fastq.gz	Y2019	NC324	Ames 27158	ss	HN	N	sp2	spb2	1167	1	1	67	rep3	44	39	30	55	29	32	30	21	34	11	7	17	33	25	38	15	9	20	22	8	12	17	20	28	9	25	21	12	11	11	40	0	0	17	12
HAV_5053	HAV_5053_S104_R1_001.fastq.gz	Y2019	NC358	Ames 27175	ts	HN	N	sp2	spb2	1170	1	1	70	rep1	30	29	22	28	19	31	23	10	24	15	11	8	15	13	23	0	0	0	0	0	0	0	0	0	0	0	0	0	0	0	0	0	0	0	0
HAV_5054	HAV_5054_S112_R1_001.fastq.gz	Y2019	NC358	Ames 27175	ts	HN	N	sp2	spb2	1170	1	1	70	rep2	39	42	26	39	24	36	29	22	26	24	31	41	23	17	27	0	0	0	0	0	0	0	0	0	0	0	0	0	0	0	0	0	0	0	0
HAV_5055	HAV_5055_S120_R1_001.fastq.gz	Y2019	NC358	Ames 27175	ts	HN	N	sp2	spb2	1170	1	1	70	rep3	42	43	27	33	28	35	19	18	29	15	11	16	30	24	26	0	0	0	0	0	0	0	0	0	0	0	0	0	0	0	0	0	0	0	0
HAV_5056	HAV_5056_S128_R1_001.fastq.gz	Y2019	PA762	Ames 27184	nss	HN	N	sp2	spb3	1171	1	1	71	rep1	12	21	13	18	14	13	13	10	12	33	24	43	15	5	21	20	24	20	29	13	19	20	16	22	23	17	14	22	20	10	24	22	23	19	34
HAV_5057	HAV_5057_S73_R1_001.fastq.gz	Y2019	PA762	Ames 27184	nss	HN	N	sp2	spb3	1171	1	1	71	rep2	28	20	18	19	15	33	23	9	15	17	17	21	18	18	19	14	15	23	22	0	10	14	21	17	12	12	12	18	0	24	33	42	39	46	37
HAV_5058	HAV_5058_S81_R1_001.fastq.gz	Y2019	PA762	Ames 27184	nss	HN	N	sp2	spb3	1171	1	1	71	rep3	17	18	19	20	20	14	18	7	12	38	25	44	6	9	16	0	0	0	0	0	0	0	0	0	0	0	0	0	0	0	0	18	20	18	24
HAV_5059	HAV_5059_S89_R1_001.fastq.gz	Y2019	OH7B	Ames 19323	nss	HN	N	sp2	spb3	1174	1	1	74	rep1	10	8	5	17	3	4	10	5	6	48	35	56	3	2	4	0	0	0	0	0	0	0	0	0	0	0	0	0	0	0	63	0	20	0	0
HAV_5060	HAV_5060_S97_R1_001.fastq.gz	Y2019	OH7B	Ames 19323	nss	HN	N	sp2	spb3	1174	1	1	74	rep2	12	3	3	8	5	7	7	1	2	17	10	28	7	2	6	0	0	0	0	0	0	0	0	0	0	0	0	0	0	0	0	0	15	0	0
HAV_5061	HAV_5061_S105_R1_001.fastq.gz	Y2019	OH7B	Ames 19323	nss	HN	N	sp2	spb3	1174	1	1	74	rep3	11	5	7	7	2	5	3	6	2	62	53	62	5	9	5	0	0	0	0	0	0	0	0	0	0	0	0	0	0	0	0	0	0	0	65
HAV_5062	HAV_5062_S113_R1_001.fastq.gz	Y2019	VA102	PI 587151	nss	HN	N	sp2	spb3	1176	1	1	76	rep1	29	31	17	18	12	16	23	9	13	60	53	55	27	12	19	0	0	0	0	0	0	0	0	0	0	0	0	0	0	0	40	37	39	57	39
HAV_5063	HAV_5063_S121_R1_001.fastq.gz	Y2019	VA102	PI 587151	nss	HN	N	sp2	spb3	1176	1	1	76	rep2	18	25	13	15	15	26	19	12	13	197	141	193	19	9	30	0	0	0	0	0	0	0	0	0	0	0	0	0	0	0	145	124	150	195	178
HAV_5064	HAV_5064_S129_R1_001.fastq.gz	Y2019	VA102	PI 587151	nss	HN	N	sp2	spb3	1176	1	1	76	rep3	0	0	0	16	9	12	0	0	21	9	0	0	0	0	10	0	0	0	0	0	0	0	0	0	0	0	0	0	0	0	0	0	0	0	0
HAV_5065	HAV_5065_S74_R1_001.fastq.gz	Y2019	W117HT	Ames 8399	mixed	HN	N	sp2	spb3	1177	1	1	77	rep1	113	75	69	78	63	68	65	39	54	20	9	23	66	48	58	21	11	21	12	15	16	25	15	17	18	9	13	16	0	17	0	0	0	27	0
HAV_5066	HAV_5066_S82_R1_001.fastq.gz	Y2019	W117HT	Ames 8399	mixed	HN	N	sp2	spb3	1177	1	1	77	rep2	99	65	53	72	52	75	48	34	46	10	4	14	66	43	53	0	0	0	0	0	0	0	0	0	0	0	0	0	0	0	22	22	28	22	31
HAV_5067	HAV_5067_S90_R1_001.fastq.gz	Y2019	W117HT	Ames 8399	mixed	HN	N	sp2	spb3	1177	1	1	77	rep3	0	14	0	18	0	0	0	8	15	11	4	0	0	5	10	0	0	0	0	0	0	0	0	0	0	0	0	0	0	0	0	0	0	42	0
HAV_5068	HAV_5068_S98_R1_001.fastq.gz	Y2019	OH603	PI 573098	mixed	HN	N	sp2	spb3	1180	1	1	80	rep1	30	32	17	31	20	17	23	25	13	9	9	16	22	13	33	37	13	21	21	15	16	23	19	26	23	12	31	20	13	26	0	0	0	46	0
HAV_5069	HAV_5069_S106_R1_001.fastq.gz	Y2019	OH603	PI 573098	mixed	HN	N	sp2	spb3	1180	1	1	80	rep2	28	25	20	39	19	30	25	11	29	53	38	48	19	17	16	0	0	0	0	0	0	0	0	0	0	0	0	0	0	0	34	0	0	24	0
HAV_5070	HAV_5070_S114_R1_001.fastq.gz	Y2019	OH603	PI 573098	mixed	HN	N	sp2	spb3	1180	1	1	80	rep3	90	90	49	63	59	57	86	52	48	66	55	56	60	33	63	0	12	14	15	0	0	13	0	11	14	0	0	9	0	11	0	0	0	0	0
HAV_5071	HAV_5071_S122_R1_001.fastq.gz	Y2019	OH43E	Ames 27183	nss	HN	N	sp2	spb3	1181	1	1	81	rep1	52	62	31	40	43	53	33	31	29	12	10	8	41	28	38	0	0	11	13	0	0	5	0	11	0	0	0	13	0	0	40	61	62	71	67
HAV_5072	HAV_5072_S130_R1_001.fastq.gz	Y2019	OH43E	Ames 27183	nss	HN	N	sp2	spb3	1181	1	1	81	rep2	86	102	66	76	64	86	63	48	63	14	13	15	72	69	64	0	0	0	0	0	0	0	0	0	0	0	0	0	0	0	50	46	56	71	54
HAV_5073	HAV_5073_S75_R1_001.fastq.gz	Y2019	OH43E	Ames 27183	nss	HN	N	sp2	spb3	1181	1	1	81	rep3	24	16	10	22	13	22	13	21	12	4	3	7	14	11	9	0	0	0	0	0	0	0	0	0	0	0	0	0	0	0	0	0	0	0	0
HAV_5074	HAV_5074_S83_R1_001.fastq.gz	Y2019	PA875	Ames 27185	nss	HN	N	sp2	spb3	1184	1	1	84	rep1	9	7	7	10	9	14	10	4	9	32	22	48	13	6	13	0	0	0	0	0	0	0	0	0	0	0	0	0	0	0	20	0	17	22	18
HAV_5075	HAV_5075_S91_R1_001.fastq.gz	Y2019	PA875	Ames 27185	nss	HN	N	sp2	spb3	1184	1	1	84	rep2	26	28	11	28	24	21	23	17	15	33	9	25	17	23	16	19	19	18	36	22	20	28	27	38	26	20	18	28	17	22	30	39	25	34	28
HAV_5076	HAV_5076_S99_R1_001.fastq.gz	Y2019	PA875	Ames 27185	nss	HN	N	sp2	spb3	1184	1	1	84	rep3	14	0	16	17	12	16	15	0	0	0	0	5	13	0	20	0	0	0	0	0	0	0	0	0	0	0	0	0	0	0	50	39	44	75	58
HAV_5077	HAV_5077_S107_R1_001.fastq.gz	Y2019	A661	PI 607521	nss	HN	N	sp1	spb1	1201	1	2	01	rep1	45	50	26	45	44	33	36	21	24	18	12	20	33	23	20	0	0	0	0	0	0	0	0	0	0	0	0	0	0	0	0	0	0	47	0
HAV_5078	HAV_5078_S115_R1_001.fastq.gz	Y2019	A661	PI 607521	nss	HN	N	sp1	spb1	1201	1	2	01	rep2	53	51	28	52	43	32	30	25	41	25	22	29	39	21	36	0	0	0	0	0	0	0	0	0	0	0	0	0	0	0	0	0	0	40	0
HAV_5079	HAV_5079_S123_R1_001.fastq.gz	Y2019	A661	PI 607521	nss	HN	N	sp1	spb1	1201	1	2	01	rep3	31	33	26	20	12	14	17	7	15	25	28	23	21	15	18	0	0	0	0	0	0	0	0	0	0	0	0	0	0	0	0	0	81	0	0
HAV_5080	HAV_5080_S131_R1_001.fastq.gz	Y2019	A634	Ames 19308	ss	HN	N	sp1	spb1	1204	1	2	04	rep1	14	8	14	18	7	9	5	15	9	26	19	29	5	8	10	0	0	0	0	0	0	0	0	0	0	0	5	0	0	0	28	34	36	33	31
HAV_5081	HAV_5081_S1_R1_001.fastq.gz	Y2019	A634	Ames 19308	ss	HN	N	sp1	spb1	1204	1	2	04	rep2	30	34	29	39	34	37	26	13	38	33	23	16	34	21	24	0	0	0	0	0	0	0	0	0	0	0	0	0	0	0	0	0	0	64	49
HAV_5082	HAV_5082_S10_R1_001.fastq.gz	Y2019	A634	Ames 19308	ss	HN	N	sp1	spb1	1204	1	2	04	rep3	33	27	24	41	16	24	16	12	18	32	15	25	22	18	24	21	24	28	37	10	20	35	32	36	21	13	25	28	23	20	0	0	0	72	0
HAV_5083	HAV_5083_S19_R1_001.fastq.gz	Y2019	CM105	PI 587124	ss	HN	N	sp1	spb1	1206	1	2	06	rep1	38	38	26	31	21	33	26	19	24	47	43	77	14	15	16	0	0	0	0	0	0	0	0	0	0	0	0	0	0	0	38	35	55	61	58
HAV_5084	HAV_5084_S28_R1_001.fastq.gz	Y2019	CM105	PI 587124	ss	HN	N	sp1	spb1	1206	1	2	06	rep2	41	33	39	39	38	39	41	17	33	17	13	28	32	23	31	0	0	0	0	0	0	0	0	0	0	0	0	0	0	0	0	32	12	13	19
HAV_5085	HAV_5085_S37_R1_001.fastq.gz	Y2019	CM105	PI 587124	ss	HN	N	sp1	spb1	1206	1	2	06	rep3	30	14	11	10	7	17	10	10	5	69	55	78	13	8	14	0	0	0	0	0	0	0	0	0	0	0	0	0	0	0	82	82	96	116	126
HAV_5086	HAV_5086_S45_R1_001.fastq.gz	Y2019	A659	NSL 81599	nss	HN	N	sp1	spb1	1208	1	2	08	rep1	320	243	195	247	181	220	188	151	181	73	45	79	180	128	161	0	0	0	0	0	0	0	0	0	0	0	0	0	0	0	32	17	31	46	28
HAV_5087	HAV_5087_S53_R1_001.fastq.gz	Y2019	A659	NSL 81599	nss	HN	N	sp1	spb1	1208	1	2	08	rep2	52	38	35	35	34	42	46	22	23	25	13	36	34	18	36	0	0	0	0	0	0	0	0	0	0	0	0	0	0	0	26	0	15	41	17
HAV_5088	HAV_5088_S61_R1_001.fastq.gz	Y2019	A659	NSL 81599	nss	HN	N	sp1	spb1	1208	1	2	08	rep3	58	49	25	35	38	38	39	23	30	44	43	57	38	27	21	0	0	0	0	0	0	0	0	0	0	0	0	0	0	0	0	0	0	0	0
HAV_5089	HAV_5089_S2_R1_001.fastq.gz	Y2019	CH9	Ames 27068	nss	HN	N	sp1	spb1	1209	1	2	09	rep1	45	46	35	38	30	38	30	28	23	15	17	7	35	20	34	0	0	0	0	0	0	0	0	0	0	0	0	0	0	0	50	46	62	67	71
HAV_5090	HAV_5090_S11_R1_001.fastq.gz	Y2019	CH9	Ames 27068	nss	HN	N	sp1	spb1	1209	1	2	09	rep2	62	56	36	39	31	39	32	21	27	50	42	60	32	20	32	0	0	0	0	0	0	0	0	0	0	0	0	0	0	0	27	35	25	35	31
HAV_5091	HAV_5091_S20_R1_001.fastq.gz	Y2019	CH9	Ames 27068	nss	HN	N	sp1	spb1	1209	1	2	09	rep3	0	81	0	174	84	0	0	0	36	11	0	9	40	0	0	0	0	0	0	0	0	0	0	0	0	0	0	0	0	0	0	0	0	0	0
HAV_5092	HAV_5092_S29_R1_001.fastq.gz	Y2019	B64	PI 550440	ss	HN	N	sp1	spb1	1212	1	2	12	rep1	136	131	92	114	81	106	101	62	75	12	8	23	102	69	84	19	14	13	21	7	13	21	15	22	15	9	17	14	0	22	0	0	0	0	82
HAV_5093	HAV_5093_S38_R1_001.fastq.gz	Y2019	B64	PI 550440	ss	HN	N	sp1	spb1	1212	1	2	12	rep2	61	77	51	56	56	70	53	43	41	0	0	0	54	39	46	0	0	0	0	0	0	8	0	16	0	0	0	0	0	0	40	38	31	28	42
HAV_5094	HAV_5094_S46_R1_001.fastq.gz	Y2019	B64	PI 550440	ss	HN	N	sp1	spb1	1212	1	2	12	rep3	22	23	14	17	18	15	15	15	8	8	7	26	22	8	22	0	0	0	0	0	0	0	0	0	0	0	0	0	0	0	0	0	0	0	0
HAV_5095	HAV_5095_S54_R1_001.fastq.gz	Y2019	A556	Ames 23450	nss	HN	N	sp1	spb1	1214	1	2	14	rep1	286	248	193	217	176	209	216	134	172	4	3	4	185	163	196	0	0	0	0	0	0	0	0	0	0	0	0	0	0	0	24	37	20	42	34
HAV_5096	HAV_5096_S62_R1_001.fastq.gz	Y2019	A556	Ames 23450	nss	HN	N	sp1	spb1	1214	1	2	14	rep2	190	207	144	176	146	175	139	89	129	4	6	5	126	106	133	0	0	0	0	0	0	0	0	0	0	0	0	0	0	0	0	0	0	0	0
HAV_5097	HAV_5097_S3_R1_001.fastq.gz	Y2019	A556	Ames 23450	nss	HN	N	sp1	spb1	1214	1	2	14	rep3	158	168	101	142	108	128	101	83	84	25	26	28	120	90	122	15	19	14	15	18	12	22	20	19	17	13	18	15	14	14	20	0	0	67	0
HAV_5098	HAV_5098_S12_R1_001.fastq.gz	Y2019	M14	NSL 30867	nss	HN	N	sp1	spb2	1216	1	2	16	rep1	138	135	100	94	83	99	94	56	80	12	9	17	96	72	72	0	0	0	0	0	0	0	0	0	0	0	0	0	0	0	0	0	0	0	0
HAV_5099	HAV_5099_S21_R1_001.fastq.gz	Y2019	M14	NSL 30867	nss	HN	N	sp1	spb2	1216	1	2	16	rep2	74	78	54	72	60	63	60	45	63	32	20	31	67	33	56	15	11	13	14	0	18	22	8	15	15	8	0	8	0	19	48	0	15	15	0
HAV_5100	HAV_5100_S30_R1_001.fastq.gz	Y2019	M14	NSL 30867	nss	HN	N	sp1	spb2	1216	1	2	16	rep3	86	92	63	73	63	80	50	43	66	19	16	22	75	42	69	0	0	0	0	0	0	0	0	0	0	0	0	0	0	0	0	0	0	0	0
HAV_5101	HAV_5101_S39_R1_001.fastq.gz	Y2019	IA2132	Ames 28364	sweet	HN	N	sp1	spb2	1218	1	2	18	rep1	64	78	54	71	56	50	58	38	55	47	49	60	52	41	64	0	0	0	0	0	0	0	0	0	0	0	0	0	0	0	46	47	45	59	56
HAV_5102	HAV_5102_S47_R1_001.fastq.gz	Y2019	IA2132	Ames 28364	sweet	HN	N	sp1	spb2	1218	1	2	18	rep2	116	91	67	65	65	91	76	46	84	14	11	5	67	57	72	0	0	0	0	0	0	0	0	0	0	0	0	0	0	0	38	30	47	52	42
HAV_5103	HAV_5103_S55_R1_001.fastq.gz	Y2019	IA2132	Ames 28364	sweet	HN	N	sp1	spb2	1218	1	2	18	rep3	16	23	12	27	17	22	13	13	8	82	40	70	14	17	19	0	0	0	0	0	0	0	0	0	0	0	0	0	0	0	22	16	26	29	40
HAV_5104	HAV_5104_S63_R1_001.fastq.gz	Y2019	H105W	PI 587127	mixed	HN	N	sp1	spb2	1219	1	2	19	rep1	36	20	19	20	14	17	17	12	13	16	12	18	14	13	12	0	6	8	0	0	0	0	0	13	0	0	0	7	0	12	0	0	0	0	0
HAV_5105	HAV_5105_S4_R1_001.fastq.gz	Y2019	H105W	PI 587127	mixed	HN	N	sp1	spb2	1219	1	2	19	rep2	87	65	55	63	38	67	57	35	48	43	27	42	55	49	48	0	0	0	0	0	0	19	0	11	13	14	0	0	0	0	10	0	0	0	69
HAV_5106	HAV_5106_S13_R1_001.fastq.gz	Y2019	H105W	PI 587127	mixed	HN	N	sp1	spb2	1219	1	2	19	rep3	44	37	23	50	33	40	49	23	34	36	29	57	39	29	34	17	15	22	25	19	12	27	14	22	34	26	24	24	9	29	0	0	0	15	20
HAV_5107	HAV_5107_S22_R1_001.fastq.gz	Y2019	H99	PI 587129	nss	HN	N	sp1	spb2	1221	1	2	21	rep1	82	49	38	62	55	60	58	38	52	0	0	0	44	33	57	0	0	0	0	0	0	0	0	0	0	0	0	0	0	0	20	0	0	38	13
HAV_5108	HAV_5108_S31_R1_001.fastq.gz	Y2019	H99	PI 587129	nss	HN	N	sp1	spb2	1221	1	2	21	rep2	274	215	166	235	195	197	193	122	176	0	0	0	197	145	177	0	0	0	0	0	0	0	0	0	0	0	0	0	0	0	0	23	0	12	40
HAV_5109	HAV_5109_S40_R1_001.fastq.gz	Y2019	H99	PI 587129	nss	HN	N	sp1	spb2	1221	1	2	21	rep3	19	26	15	24	12	17	26	9	19	57	41	57	12	13	21	0	0	0	0	0	0	0	0	0	0	0	0	0	0	0	34	35	51	48	41
HAV_5110	HAV_5110_S48_R1_001.fastq.gz	Y2019	MS1334	Ames 24752	nss	HN	N	sp1	spb2	1223	1	2	23	rep1	23	36	13	30	21	21	16	19	17	67	65	78	21	13	13	0	0	0	0	0	0	0	0	0	0	0	0	0	0	0	0	0	0	0	0
HAV_5111	HAV_5111_S56_R1_001.fastq.gz	Y2019	MS1334	Ames 24752	nss	HN	N	sp1	spb2	1223	1	2	23	rep2	35	27	24	28	25	23	36	18	18	16	15	23	44	27	36	0	0	0	0	0	0	0	0	0	0	0	0	0	0	0	0	0	0	0	0
HAV_5112	HAV_5112_S64_R1_001.fastq.gz	Y2019	MS1334	Ames 24752	nss	HN	N	sp1	spb2	1223	1	2	23	rep3	32	25	14	32	19	26	18	9	19	109	81	121	25	11	30	25	24	26	34	17	23	37	26	27	17	21	23	22	12	23	0	0	0	18	0
HAV_5113	HAV_5113_S5_R1_001.fastq.gz	Y2019	MO47	PI 583352	mixed	HN	N	sp1	spb2	1225	1	2	25	rep1	22	29	20	12	7	21	14	10	18	50	51	77	19	8	15	21	24	23	32	20	15	30	19	34	22	26	20	30	15	24	16	0	15	31	18
HAV_5114	HAV_5114_S14_R1_001.fastq.gz	Y2019	MO47	PI 583352	mixed	HN	N	sp1	spb2	1225	1	2	25	rep2	26	24	19	27	16	23	36	20	27	27	13	19	24	14	26	0	0	0	0	0	0	0	0	0	0	0	0	0	0	0	0	0	0	0	45
HAV_5115	HAV_5115_S23_R1_001.fastq.gz	Y2019	MO47	PI 583352	mixed	HN	N	sp1	spb2	1225	1	2	25	rep3	18	24	18	36	19	29	20	9	22	153	100	171	21	20	18	0	0	0	0	0	0	0	0	0	0	0	0	0	0	0	100	0	0	0	0
HAV_5116	HAV_5116_S32_R1_001.fastq.gz	Y2019	CO125	Ames 27106	nss	HN	N	sp1	spb2	1228	1	2	28	rep1	35	27	21	27	22	22	26	15	22	12	12	9	14	16	25	0	11	0	0	0	0	0	0	13	0	0	5	0	0	10	0	0	0	0	0
HAV_5117	HAV_5117_S41_R1_001.fastq.gz	Y2019	CO125	Ames 27106	nss	HN	N	sp1	spb2	1228	1	2	28	rep2	27	30	22	16	23	20	22	14	26	82	58	49	27	24	27	0	0	0	0	0	0	0	0	0	0	0	0	0	0	0	84	88	70	118	87
HAV_5118	HAV_5118_S49_R1_001.fastq.gz	Y2019	CO125	Ames 27106	nss	HN	N	sp1	spb2	1228	1	2	28	rep3	10	10	3	4	5	8	8	2	1	154	127	195	4	3	6	0	0	0	0	0	0	0	0	0	0	0	0	0	0	0	25	31	26	47	49
HAV_5119	HAV_5119_S57_R1_001.fastq.gz	Y2019	NC330	Ames 27161	ss	HN	N	sp1	spb3	1230	1	2	30	rep1	76	79	71	76	63	74	86	29	78	32	33	42	83	52	64	0	0	0	0	0	0	0	0	0	0	0	0	0	0	0	0	0	0	0	39
HAV_5120	HAV_5120_S65_R1_001.fastq.gz	Y2019	NC330	Ames 27161	ss	HN	N	sp1	spb3	1230	1	2	30	rep2	73	85	48	61	53	74	51	30	48	44	38	68	54	49	46	0	0	0	0	0	0	0	0	0	0	0	0	0	0	0	25	0	0	0	41
HAV_5121	HAV_5121_S6_R1_001.fastq.gz	Y2019	NC330	Ames 27161	ss	HN	N	sp1	spb3	1230	1	2	30	rep3	128	131	83	116	105	112	87	62	79	187	96	170	93	63	92	65	63	71	84	48	64	94	66	97	60	70	69	87	52	57	0	57	0	0	33
HAV_5122	HAV_5122_S15_R1_001.fastq.gz	Y2019	NC334	Ames 27163	ts	HN	N	sp1	spb3	1232	1	2	32	rep1	50	31	31	40	34	31	35	21	31	30	15	32	33	16	35	12	17	12	19	10	0	17	13	20	10	15	22	19	12	19	0	0	0	88	0
HAV_5123	HAV_5123_S24_R1_001.fastq.gz	Y2019	NC334	Ames 27163	ts	HN	N	sp1	spb3	1232	1	2	32	rep2	44	33	38	36	31	33	28	22	27	58	51	73	24	15	32	0	0	0	0	0	0	0	0	0	0	0	0	0	0	0	0	0	0	0	0
HAV_5124	HAV_5124_S33_R1_001.fastq.gz	Y2019	NC334	Ames 27163	ts	HN	N	sp1	spb3	1232	1	2	32	rep3	67	57	39	47	52	45	51	30	39	264	221	310	50	27	44	12	10	13	19	0	0	15	16	17	0	0	15	13	0	0	0	0	0	0	0
HAV_5125	HAV_5125_S42_R1_001.fastq.gz	Y2019	P39	Ames 28186	sweet	HN	N	sp1	spb3	1234	1	2	34	rep1	15	16	9	13	11	11	7	0	8	15	0	15	11	9	11	0	0	0	0	0	0	0	0	0	0	0	0	0	0	0	49	56	43	76	59
HAV_5126	HAV_5126_S50_R1_001.fastq.gz	Y2019	P39	Ames 28186	sweet	HN	N	sp1	spb3	1234	1	2	34	rep2	134	105	97	113	94	89	78	51	95	70	46	77	101	52	81	0	0	0	0	0	0	0	0	0	0	0	0	0	0	0	58	69	67	77	89
HAV_5127	HAV_5127_S58_R1_001.fastq.gz	Y2019	P39	Ames 28186	sweet	HN	N	sp1	spb3	1234	1	2	34	rep3	53	52	28	47	35	50	42	39	25	170	100	177	41	34	34	0	0	0	0	0	0	0	0	0	0	0	0	0	0	0	21	37	36	38	29
HAV_5128	HAV_5128_S66_R1_001.fastq.gz	Y2019	NC312	Ames 27152	ss	HN	N	sp1	spb3	1236	1	2	36	rep1	33	27	30	25	16	18	13	12	25	6	3	5	25	21	21	0	0	0	0	0	0	0	0	0	0	0	0	0	0	0	25	0	17	45	25
HAV_5129	HAV_5129_S7_R1_001.fastq.gz	Y2019	NC312	Ames 27152	ss	HN	N	sp1	spb3	1236	1	2	36	rep2	53	38	40	40	42	41	36	24	32	68	36	64	37	26	43	0	0	0	0	0	0	9	0	9	0	0	0	0	0	0	30	0	0	0	73
HAV_5130	HAV_5130_S16_R1_001.fastq.gz	Y2019	NC312	Ames 27152	ss	HN	N	sp1	spb3	1236	1	2	36	rep3	6	18	8	15	13	11	16	0	18	10	0	4	8	28	7	0	0	0	0	0	0	0	0	0	0	0	0	0	0	0	0	0	0	0	76
HAV_5131	HAV_5131_S25_R1_001.fastq.gz	Y2019	NC308	Ames 27150	ss	HN	N	sp1	spb3	1238	1	2	38	rep1	358	326	259	282	269	262	234	160	205	0	0	0	253	185	238	0	0	0	0	0	0	0	0	0	0	0	0	0	0	0	0	0	0	0	104
HAV_5132	HAV_5132_S34_R1_001.fastq.gz	Y2019	NC308	Ames 27150	ss	HN	N	sp1	spb3	1238	1	2	38	rep2	132	139	86	143	108	135	142	64	89	12	11	9	117	88	89	25	15	11	24	14	14	30	19	23	15	12	15	15	15	11	0	12	0	0	33
HAV_5133	HAV_5133_S43_R1_001.fastq.gz	Y2019	NC308	Ames 27150	ss	HN	N	sp1	spb3	1238	1	2	38	rep3	22	16	9	20	12	22	26	0	14	0	0	0	18	5	22	0	0	0	0	0	0	0	0	0	0	0	0	0	0	0	65	0	0	25	33
HAV_5134	HAV_5134_S51_R1_001.fastq.gz	Y2019	NC268	PI 587145	ss	HN	N	sp1	spb3	1239	1	2	39	rep1	30	28	18	17	19	21	14	17	15	29	26	42	13	14	22	0	0	0	0	0	0	14	0	21	0	0	0	0	0	16	0	0	0	0	83
HAV_5135	HAV_5135_S59_R1_001.fastq.gz	Y2019	NC268	PI 587145	ss	HN	N	sp1	spb3	1239	1	2	39	rep2	112	99	86	91	96	85	93	53	73	9	12	15	85	59	86	0	0	14	14	0	0	16	0	0	0	0	0	18	0	0	20	0	25	43	27
HAV_5136	HAV_5136_S67_R1_001.fastq.gz	Y2019	NC268	PI 587145	ss	HN	N	sp1	spb3	1239	1	2	39	rep3	187	161	105	143	125	142	106	88	123	13	7	17	118	96	158	0	0	0	0	0	0	0	0	0	0	0	0	0	0	0	0	0	0	0	45
HAV_5137	HAV_5137_S8_R1_001.fastq.gz	Y2019	ND246	PI 550490	mixed	HN	N	sp1	spb3	1241	1	2	41	rep1	28	21	15	20	15	22	16	11	10	44	45	57	21	14	12	16	0	16	16	0	0	17	13	11	7	12	9	10	0	17	0	30	26	19	19
HAV_5138	HAV_5138_S17_R1_001.fastq.gz	Y2019	ND246	PI 550490	mixed	HN	N	sp1	spb3	1241	1	2	41	rep2	62	54	41	41	28	48	57	25	32	130	108	126	44	32	42	0	0	0	0	0	0	8	0	0	0	0	0	0	0	0	0	17	0	18	43
HAV_5139	HAV_5139_S26_R1_001.fastq.gz	Y2019	ND246	PI 550490	mixed	HN	N	sp1	spb3	1241	1	2	41	rep3	128	106	73	103	77	94	76	42	74	66	50	66	106	59	95	10	0	0	21	0	0	19	11	12	16	0	18	20	0	13	0	0	0	0	0
HAV_5140	HAV_5140_S35_R1_001.fastq.gz	Y2019	CML323	Ames 27097	mixed	HN	N	sp2	spb1	1243	1	2	43	rep1	9	7	7	6	5	5	9	5	8	132	131	153	9	6	7	0	0	0	0	0	0	0	13	0	7	0	0	12	0	0	0	0	0	0	0
HAV_5141	HAV_5141_S44_R1_001.fastq.gz	Y2019	CML323	Ames 27097	mixed	HN	N	sp2	spb1	1243	1	2	43	rep2	17	6	13	12	18	10	15	7	10	54	40	46	9	9	1	0	0	0	0	0	0	0	0	0	0	0	0	0	0	0	0	0	0	0	59
HAV_5142	HAV_5142_S52_R1_001.fastq.gz	Y2019	CML323	Ames 27097	mixed	HN	N	sp2	spb1	1243	1	2	43	rep3	93	80	68	83	72	77	81	48	55	97	82	145	71	57	70	0	0	0	0	0	0	0	0	0	0	0	0	0	0	0	48	61	68	66	66
HAV_5143	HAV_5143_S60_R1_001.fastq.gz	Y2019	CI187-2	Ames 26138	nss	HN	N	sp2	spb1	1245	1	2	45	rep1	56	39	47	40	44	40	34	23	43	46	55	74	40	30	44	0	0	0	0	0	0	0	0	0	0	0	0	0	0	0	23	12	18	19	37
HAV_5144	HAV_5144_S68_R1_001.fastq.gz	Y2019	CI187-2	Ames 26138	nss	HN	N	sp2	spb1	1245	1	2	45	rep2	37	30	37	54	29	30	26	21	31	5	4	9	34	29	30	0	0	0	0	0	0	0	0	0	0	0	0	0	0	0	32	35	31	38	35
HAV_5145	HAV_5145_S69_R1_001.fastq.gz	Y2019	CI187-2	Ames 26138	nss	HN	N	sp2	spb1	1245	1	2	45	rep3	10	15	5	18	8	7	9	8	12	81	67	83	11	8	8	0	0	0	0	0	0	0	0	0	0	0	0	0	0	0	0	0	0	0	63
HAV_5146	HAV_5146_S77_R1_001.fastq.gz	Y2019	CI90C	Ames 22440	mixed	HN	N	sp2	spb1	1248	1	2	48	rep1	21	35	22	23	30	21	14	9	16	112	87	148	15	7	25	0	0	0	12	0	11	6	7	17	12	10	9	0	0	0	39	37	40	45	55
HAV_5147	HAV_5147_S85_R1_001.fastq.gz	Y2019	CI90C	Ames 22440	mixed	HN	N	sp2	spb1	1248	1	2	48	rep2	227	204	164	180	162	165	156	103	145	43	30	27	202	118	163	0	18	10	21	0	0	14	0	21	9	0	11	12	0	13	51	15	0	20	14
HAV_5148	HAV_5148_S93_R1_001.fastq.gz	Y2019	CI90C	Ames 22440	mixed	HN	N	sp2	spb1	1248	1	2	48	rep3	8	6	7	11	5	10	3	6	4	33	30	51	10	1	6	0	0	0	0	0	0	0	0	0	0	0	0	0	0	0	23	0	0	29	19
HAV_5149	HAV_5149_S101_R1_001.fastq.gz	Y2019	B105	PI 594048	mixed	HN	N	sp2	spb1	1250	1	2	50	rep1	21	3	12	5	7	10	6	7	7	54	47	83	6	10	6	0	0	0	0	0	0	0	0	0	0	0	0	0	0	0	200	180	208	243	205
HAV_5150	HAV_5150_S109_R1_001.fastq.gz	Y2019	B105	PI 594048	mixed	HN	N	sp2	spb1	1250	1	2	50	rep2	22	22	6	18	8	19	8	11	12	35	25	47	7	5	9	0	0	0	0	0	0	0	0	0	0	0	0	0	0	0	159	150	161	194	195
HAV_5151	HAV_5151_S117_R1_001.fastq.gz	Y2019	B105	PI 594048	mixed	HN	N	sp2	spb1	1250	1	2	50	rep3	37	28	19	28	19	20	32	20	15	194	179	221	21	23	25	0	0	0	0	0	0	0	0	0	0	0	0	0	0	0	165	151	163	205	217
HAV_5152	HAV_5152_S125_R1_001.fastq.gz	Y2019	K55	Ames 22754	nss	HN	N	sp2	spb1	1251	1	2	51	rep1	26	42	27	20	24	27	28	23	20	88	71	100	28	12	33	9	0	0	0	0	0	0	0	0	0	0	0	0	0	0	0	0	0	0	0
HAV_5153	HAV_5153_S70_R1_001.fastq.gz	Y2019	K55	Ames 22754	nss	HN	N	sp2	spb1	1251	1	2	51	rep2	56	55	42	64	33	56	36	35	48	54	48	71	30	33	47	0	0	0	0	0	0	0	0	0	0	0	0	0	0	0	11	0	0	58	0
HAV_5154	HAV_5154_S78_R1_001.fastq.gz	Y2019	K55	Ames 22754	nss	HN	N	sp2	spb1	1251	1	2	51	rep3	128	125	79	111	94	102	99	64	89	26	26	28	88	68	86	0	0	0	0	0	0	0	0	0	0	0	0	0	0	0	0	0	0	0	0
HAV_5155	HAV_5155_S86_R1_001.fastq.gz	Y2019	B57	PI 550472	nss	HN	N	sp2	spb1	1254	1	2	54	rep1	140	120	116	132	100	107	90	69	101	15	14	11	109	82	95	0	0	0	0	0	0	0	11	10	0	0	11	14	0	9	29	16	29	35	33
HAV_5156	HAV_5156_S94_R1_001.fastq.gz	Y2019	B57	PI 550472	nss	HN	N	sp2	spb1	1254	1	2	54	rep2	55	43	40	43	33	48	42	28	37	23	15	27	44	44	47	0	0	0	0	0	0	0	7	10	3	0	0	0	0	0	53	48	41	68	55
HAV_5157	HAV_5157_S102_R1_001.fastq.gz	Y2019	B57	PI 550472	nss	HN	N	sp2	spb1	1254	1	2	54	rep3	57	51	35	52	28	39	33	25	34	6	5	9	33	31	30	0	0	0	0	0	0	0	0	0	0	0	7	0	0	0	0	0	0	0	0
HAV_5158	HAV_5158_S110_R1_001.fastq.gz	Y2019	H84	PI 587128	mixed	HN	N	sp2	spb1	1255	1	2	55	rep1	14	20	20	19	25	19	11	14	8	33	31	39	18	9	8	0	0	0	0	0	0	0	0	0	0	0	0	0	0	0	0	0	0	76	0
HAV_5159	HAV_5159_S118_R1_001.fastq.gz	Y2019	H84	PI 587128	mixed	HN	N	sp2	spb1	1255	1	2	55	rep2	29	28	16	19	29	19	25	17	23	45	25	60	30	21	25	0	0	0	0	0	0	0	0	0	0	0	0	0	0	0	0	0	0	0	0
HAV_5160	HAV_5160_S126_R1_001.fastq.gz	Y2019	H84	PI 587128	mixed	HN	N	sp2	spb1	1255	1	2	55	rep3	40	40	36	45	43	29	31	28	31	93	67	86	36	18	36	0	0	0	0	0	0	0	0	0	0	0	0	0	0	0	0	19	0	49	20
HAV_5161	HAV_5161_S71_R1_001.fastq.gz	Y2019	MP339	PI 543916	mixed	HN	N	sp2	spb2	1258	1	2	58	rep1	207	218	143	152	137	177	156	90	127	20	15	19	163	100	130	0	0	0	0	0	0	0	0	0	0	0	0	0	0	0	37	28	32	32	23
HAV_5162	HAV_5162_S79_R1_001.fastq.gz	Y2019	MP339	PI 543916	mixed	HN	N	sp2	spb2	1258	1	2	58	rep2	232	241	161	198	165	193	187	138	134	6	7	12	193	143	203	12	11	11	10	11	14	14	16	13	15	0	12	6	0	0	0	0	0	0	0
HAV_5163	HAV_5163_S87_R1_001.fastq.gz	Y2019	MP339	PI 543916	mixed	HN	N	sp2	spb2	1258	1	2	58	rep3	251	232	151	237	199	202	193	126	171	7	4	11	238	118	176	0	0	0	0	0	0	0	0	0	0	0	0	0	0	0	0	0	0	0	0
HAV_5164	HAV_5164_S95_R1_001.fastq.gz	Y2019	NC232	Ames 12732	nss	HN	N	sp2	spb2	1259	1	2	59	rep1	177	140	102	143	109	124	127	89	106	0	0	0	127	83	111	0	0	0	0	0	0	0	0	0	0	0	0	0	0	0	0	0	0	0	0
HAV_5165	HAV_5165_S103_R1_001.fastq.gz	Y2019	NC232	Ames 12732	nss	HN	N	sp2	spb2	1259	1	2	59	rep2	21	13	10	16	17	19	15	13	15	30	18	20	10	18	14	0	0	0	0	0	0	0	0	0	0	0	0	0	0	0	78	63	58	88	114
HAV_5166	HAV_5166_S111_R1_001.fastq.gz	Y2019	NC232	Ames 12732	nss	HN	N	sp2	spb2	1259	1	2	59	rep3	102	130	80	85	105	92	99	59	80	0	0	0	100	54	81	0	0	0	0	0	0	0	0	0	0	0	0	0	0	0	0	0	0	0	0
HAV_5167	HAV_5167_S119_R1_001.fastq.gz	Y2019	KI11	Ames 27124	ts	HN	N	sp2	spb2	1261	1	2	61	rep1	11	23	8	19	6	7	15	12	12	39	26	33	13	13	7	61	39	53	82	44	44	57	61	75	52	65	43	62	42	62	102	112	118	118	154
HAV_5168	HAV_5168_S127_R1_001.fastq.gz	Y2019	KI11	Ames 27124	ts	HN	N	sp2	spb2	1261	1	2	61	rep2	18	15	9	10	12	12	11	6	10	184	143	194	9	7	7	0	0	0	0	0	0	15	0	0	0	0	0	0	0	0	0	0	76	0	0
HAV_5169	HAV_5169_S72_R1_001.fastq.gz	Y2019	KI11	Ames 27124	ts	HN	N	sp2	spb2	1261	1	2	61	rep3	69	70	42	51	39	64	38	36	48	73	73	93	36	34	44	0	0	0	0	0	0	0	0	0	0	0	0	0	0	0	17	17	27	29	25
HAV_5170	HAV_5170_S80_R1_001.fastq.gz	Y2019	MO46	PI 583351	nss	HN	N	sp2	spb2	1264	1	2	64	rep1	24	21	11	25	16	12	13	14	20	61	39	86	24	10	9	0	0	0	0	0	0	0	0	0	0	0	0	0	0	0	0	0	0	0	0
HAV_5171	HAV_5171_S88_R1_001.fastq.gz	Y2019	MO46	PI 583351	nss	HN	N	sp2	spb2	1264	1	2	64	rep2	0	0	0	0	68	0	47	0	0	0	0	0	0	0	0	0	0	0	0	0	0	0	0	0	0	0	0	0	0	0	0	0	0	0	0
HAV_5172	HAV_5172_S96_R1_001.fastq.gz	Y2019	MO46	PI 583351	nss	HN	N	sp2	spb2	1264	1	2	64	rep3	50	43	36	54	37	36	32	20	31	42	46	51	32	29	34	30	34	25	34	11	30	44	39	48	37	36	33	30	22	34	0	0	0	0	0
HAV_5173	HAV_5173_S104_R1_001.fastq.gz	Y2019	NC356	Ames 27174	ts	HN	N	sp2	spb2	1265	1	2	65	rep1	134	97	79	113	75	102	73	56	60	94	76	102	74	71	51	0	9	0	0	0	0	9	0	19	0	0	12	12	0	0	0	0	0	0	0
HAV_5174	HAV_5174_S112_R1_001.fastq.gz	Y2019	NC356	Ames 27174	ts	HN	N	sp2	spb2	1265	1	2	65	rep2	44	56	30	37	36	30	31	26	31	109	85	135	38	26	27	0	0	0	8	0	0	13	0	0	0	0	0	0	0	0	0	0	0	0	0
HAV_5175	HAV_5175_S120_R1_001.fastq.gz	Y2019	NC356	Ames 27174	ts	HN	N	sp2	spb2	1265	1	2	65	rep3	27	25	18	31	19	19	12	9	7	18	9	24	18	16	12	0	0	0	0	0	0	0	0	0	0	0	0	0	0	0	0	0	0	0	69
HAV_5176	HAV_5176_S128_R1_001.fastq.gz	Y2019	N28HT	Ames 27138	mixed	HN	N	sp2	spb2	1268	1	2	68	rep1	27	31	17	21	10	22	22	12	18	16	11	23	19	10	26	0	0	0	0	0	0	0	0	0	0	0	0	0	0	0	0	0	0	43	0
HAV_5177	HAV_5177_S73_R1_001.fastq.gz	Y2019	N28HT	Ames 27138	mixed	HN	N	sp2	spb2	1268	1	2	68	rep2	62	67	49	56	36	57	49	40	43	72	42	71	53	27	59	0	0	0	0	0	0	0	0	0	0	0	0	0	0	0	72	88	83	97	91
HAV_5178	HAV_5178_S81_R1_001.fastq.gz	Y2019	N28HT	Ames 27138	mixed	HN	N	sp2	spb2	1268	1	2	68	rep3	7	16	6	8	12	13	5	8	6	11	9	14	2	4	10	0	0	0	0	0	0	0	0	0	0	0	0	0	0	0	0	0	16	21	0
HAV_5179	HAV_5179_S89_R1_001.fastq.gz	Y2019	NC250	PI 550555	ss	HN	N	sp2	spb2	1269	1	2	69	rep1	294	212	170	205	165	195	176	112	169	31	30	31	175	130	159	0	0	0	0	0	0	0	0	0	0	0	0	0	0	0	35	37	44	59	47
HAV_5180	HAV_5180_S97_R1_001.fastq.gz	Y2019	NC250	PI 550555	ss	HN	N	sp2	spb2	1269	1	2	69	rep2	31	28	13	34	34	32	21	20	16	59	51	69	31	19	23	20	17	19	23	17	21	29	19	28	21	17	21	23	21	29	0	0	47	30	0
HAV_5181	HAV_5181_S105_R1_001.fastq.gz	Y2019	NC250	PI 550555	ss	HN	N	sp2	spb2	1269	1	2	69	rep3	38	25	20	27	21	31	17	21	13	10	11	19	28	15	25	14	17	24	18	7	18	28	20	33	12	15	21	15	14	19	0	0	0	0	0
HAV_5182	HAV_5182_S113_R1_001.fastq.gz	Y2019	VA35	PI 587150	nss	HN	N	sp2	spb3	1271	1	2	71	rep1	74	80	58	60	60	60	67	35	51	0	0	0	66	39	59	0	0	0	0	0	0	0	0	10	0	0	0	0	0	0	54	0	0	0	0
HAV_5183	HAV_5183_S121_R1_001.fastq.gz	Y2019	VA35	PI 587150	nss	HN	N	sp2	spb3	1271	1	2	71	rep2	76	49	37	61	41	54	30	26	43	14	16	16	41	30	48	8	17	19	20	8	11	13	12	11	0	24	13	12	9	13	18	18	0	25	60
HAV_5184	HAV_5184_S129_R1_001.fastq.gz	Y2019	VA35	PI 587150	nss	HN	N	sp2	spb3	1271	1	2	71	rep3	26	28	19	27	20	27	23	18	23	10	7	21	30	17	20	15	26	14	33	18	16	34	20	26	11	23	16	21	12	17	0	0	0	0	0
HAV_5185	HAV_5185_S74_R1_001.fastq.gz	Y2019	W401	Ames 27194	nss	HN	N	sp2	spb3	1273	1	2	73	rep1	37	33	19	27	27	17	26	16	13	130	86	154	22	19	20	19	15	14	20	19	19	42	16	35	24	22	19	30	15	21	55	0	0	12	35
HAV_5186	HAV_5186_S82_R1_001.fastq.gz	Y2019	W401	Ames 27194	nss	HN	N	sp2	spb3	1273	1	2	73	rep2	30	37	19	29	19	26	28	20	31	178	142	182	21	15	25	10	13	0	22	0	0	15	14	13	0	11	18	10	0	18	36	44	70	66	71
HAV_5187	HAV_5187_S90_R1_001.fastq.gz	Y2019	W401	Ames 27194	nss	HN	N	sp2	spb3	1273	1	2	73	rep3	52	49	37	41	31	68	34	31	28	0	0	0	36	20	31	0	0	0	0	0	0	0	0	0	0	0	0	0	0	0	26	23	31	49	32
HAV_5188	HAV_5188_S98_R1_001.fastq.gz	Y2019	SG18	PI 686066	popcorn	HN	N	sp2	spb3	1276	1	2	76	rep1	47	46	37	34	29	34	32	17	30	14	18	19	31	29	29	0	0	0	0	0	0	0	0	0	0	0	0	0	0	0	18	15	20	37	33
HAV_5189	HAV_5189_S106_R1_001.fastq.gz	Y2019	SG18	PI 686066	popcorn	HN	N	sp2	spb3	1276	1	2	76	rep2	53	55	34	50	44	33	35	28	42	0	0	0	36	31	48	0	0	0	0	0	0	0	0	0	0	0	0	0	0	0	0	0	0	0	0
HAV_5190	HAV_5190_S114_R1_001.fastq.gz	Y2019	SG18	PI 686066	popcorn	HN	N	sp2	spb3	1276	1	2	76	rep3	79	87	63	66	60	81	68	41	56	54	35	38	83	51	51	0	0	0	0	0	0	0	0	0	0	0	0	0	0	0	0	0	0	40	0
HAV_5191	HAV_5191_S122_R1_001.fastq.gz	Y2019	T234	Ames 27190	nss	HN	N	sp2	spb3	1277	1	2	77	rep1	21	22	11	6	13	15	10	14	6	14	10	22	16	9	14	0	0	0	0	0	0	0	0	0	0	0	0	0	0	0	0	31	51	27	25
HAV_5192	HAV_5192_S130_R1_001.fastq.gz	Y2019	T234	Ames 27190	nss	HN	N	sp2	spb3	1277	1	2	77	rep2	45	46	34	33	35	31	24	18	22	88	78	101	33	28	34	17	10	21	18	9	0	22	15	20	12	18	10	21	0	15	0	0	68	0	0
HAV_5193	HAV_5193_S75_R1_001.fastq.gz	Y2019	T234	Ames 27190	nss	HN	N	sp2	spb3	1277	1	2	77	rep3	26	37	21	28	20	15	20	13	22	10	14	13	18	15	25	16	0	16	6	0	6	8	16	10	16	12	12	18	0	0	0	0	0	0	0
HAV_5194	HAV_5194_S83_R1_001.fastq.gz	Y2019	VAW6	Ames 19000	mixed	HN	N	sp2	spb3	1280	1	2	80	rep1	104	122	66	108	78	96	70	63	84	31	27	32	82	69	71	22	10	10	16	0	9	18	10	19	17	0	18	13	14	16	0	0	13	0	0
HAV_5195	HAV_5195_S91_R1_001.fastq.gz	Y2019	VAW6	Ames 19000	mixed	HN	N	sp2	spb3	1280	1	2	80	rep2	133	141	92	153	123	145	133	88	111	14	12	28	110	95	124	0	0	0	0	0	0	12	0	0	0	0	0	0	0	0	0	0	68	0	0
HAV_5196	HAV_5196_S99_R1_001.fastq.gz	Y2019	VAW6	Ames 19000	mixed	HN	N	sp2	spb3	1280	1	2	80	rep3	88	88	64	79	63	75	55	46	54	24	16	30	66	41	50	0	0	0	0	0	0	0	0	0	0	0	0	0	0	0	47	16	0	18	27
HAV_5197	HAV_5197_S107_R1_001.fastq.gz	Y2019	SC357	NSL 53094	mixed	HN	N	sp2	spb3	1282	1	2	82	rep1	68	58	38	64	30	51	32	34	39	20	16	35	49	25	43	5	0	0	0	0	0	14	11	15	11	13	0	15	0	10	0	0	0	44	0
HAV_5198	HAV_5198_S115_R1_001.fastq.gz	Y2019	SC357	NSL 53094	mixed	HN	N	sp2	spb3	1282	1	2	82	rep2	26	28	17	20	29	23	21	14	22	174	127	223	28	14	23	0	0	0	0	0	0	0	0	0	0	0	0	0	0	0	76	0	0	0	0
HAV_5199	HAV_5199_S123_R1_001.fastq.gz	Y2019	SC357	NSL 53094	mixed	HN	N	sp2	spb3	1282	1	2	82	rep3	64	63	37	59	66	57	64	40	61	7	3	10	59	52	49	0	0	0	0	0	0	0	0	0	0	0	0	0	0	0	0	69	0	0	0
HAV_5200	HAV_5200_S131_R1_001.fastq.gz	Y2019	NC372	Ames 27182	ss	HN	N	sp2	spb3	1283	1	2	83	rep1	35	29	39	34	20	28	33	16	27	27	15	21	24	10	29	28	15	19	18	14	18	18	17	21	22	18	12	25	12	25	0	0	0	0	85
HAV_5201	HAV_5201_S76_R1_001.fastq.gz	Y2019	NC372	Ames 27182	ss	HN	N	sp2	spb3	1283	1	2	83	rep2	12	12	12	19	12	16	16	16	12	15	13	21	15	11	12	0	0	0	0	0	0	0	0	0	0	0	0	0	0	0	0	0	56	0	40
HAV_5202	HAV_5202_S84_R1_001.fastq.gz	Y2019	NC372	Ames 27182	ss	HN	N	sp2	spb3	1283	1	2	83	rep3	40	49	26	37	24	28	32	17	19	0	0	0	21	19	22	16	9	16	14	20	18	18	20	18	25	14	13	22	0	15	0	0	0	0	0
HAV_5203	HAV_5203_S92_R1_001.fastq.gz	Y2019	38-11	Ames 26604	nss	HN	N	sp3	spb1	1302	1	3	02	rep1	71	72	60	68	59	54	55	36	51	13	9	17	51	34	45	0	0	0	0	0	0	16	0	16	0	0	0	0	0	0	0	0	0	0	0
HAV_5204	HAV_5204_S100_R1_001.fastq.gz	Y2019	38-11	Ames 26604	nss	HN	N	sp3	spb1	1302	1	3	02	rep2	24	19	14	12	21	18	5	12	16	27	27	38	14	13	11	16	15	14	23	19	26	19	14	20	15	10	17	18	15	22	0	0	0	0	0
HAV_5205	HAV_5205_S108_R1_001.fastq.gz	Y2019	38-11	Ames 26604	nss	HN	N	sp3	spb1	1302	1	3	02	rep3	105	87	51	80	86	97	69	41	63	7	7	1	60	58	81	16	20	14	19	10	0	17	20	24	25	17	21	14	0	13	41	46	55	68	64
HAV_5206	HAV_5206_S116_R1_001.fastq.gz	Y2019	CML158Q	Ames 27085	ts	HN	N	sp3	spb1	1304	1	3	04	rep1	14	11	8	5	2	11	9	10	6	23	27	34	5	10	12	17	0	15	9	0	12	28	9	11	0	12	15	14	0	17	0	0	0	0	0
HAV_5207	HAV_5207_S124_R1_001.fastq.gz	Y2019	CML158Q	Ames 27085	ts	HN	N	sp3	spb1	1304	1	3	04	rep2	10	9	13	3	5	6	9	7	7	74	48	68	6	3	3	0	0	0	0	0	0	0	0	8	0	0	0	0	0	0	0	0	0	0	0
HAV_5208	HAV_5208_S132_R1_001.fastq.gz	Y2019	CML158Q	Ames 27085	ts	HN	N	sp3	spb1	1304	1	3	04	rep3	12	15	14	17	12	22	10	10	9	35	22	42	13	9	16	0	0	0	0	0	0	0	0	0	0	0	0	0	0	0	23	0	0	58	20
HAV_5209	HAV_5209_S1_R1_001.fastq.gz	Y2019	CML108	Ames 27082	ts	HN	N	sp3	spb1	1306	1	3	06	rep1	57	65	17	14	21	19	13	10	15	6	9	13	13	6	18	0	1	0	0	0	0	0	0	0	0	0	0	0	0	0	0	0	0	0	0
HAV_5210	HAV_5210_S10_R1_001.fastq.gz	Y2019	CML108	Ames 27082	ts	HN	N	sp3	spb1	1306	1	3	06	rep2	143	104	25	31	31	32	35	25	35	17	11	22	50	19	23	3	3	5	6	5	6	7	7	12	7	10	7	9	0	7	0	0	0	0	0
HAV_5211	HAV_5211_S19_R1_001.fastq.gz	Y2019	CML108	Ames 27082	ts	HN	N	sp3	spb1	1306	1	3	06	rep3	186	187	55	36	63	61	30	37	49	55	43	67	68	18	49	0	0	0	0	0	0	0	0	0	0	0	0	0	0	0	0	0	36	0	0
HAV_5212	HAV_5212_S28_R1_001.fastq.gz	Y2019	Check_B73xMo17			HN	N	sp3	spb1	1308	1	3	08	rep1	20	31	5	7	10	6	3	5	7	8	7	11	6	0	2	0	0	5	0	0	0	4	0	11	9	0	8	7	0	0	0	0	0	0	0
HAV_5213	HAV_5213_S37_R1_001.fastq.gz	Y2019	Check_B73xMo17			HN	N	sp3	spb1	1308	1	3	08	rep2	25	35	9	4	6	12	11	10	8	20	17	23	9	3	12	0	0	0	0	0	0	0	0	0	0	0	0	0	0	0	0	85	0	0	0
HAV_5214	HAV_5214_S45_R1_001.fastq.gz	Y2019	Check_B73xMo17			HN	N	sp3	spb1	1308	1	3	08	rep3	98	110	33	27	33	34	24	14	30	13	6	17	34	12	22	0	0	0	0	0	0	0	0	0	0	0	0	0	0	0	0	0	0	77	42
HAV_5215	HAV_5215_S53_R1_001.fastq.gz	Y2019	Check_B73xMo17			HN	N	sp3	spb1	1309	1	3	09	rep1	64	73	9	16	34	22	18	21	33	5	2	8	25	9	18	0	0	0	0	0	0	0	0	0	0	0	0	0	0	0	144	165	193	266	211
HAV_5216	HAV_5216_S61_R1_001.fastq.gz	Y2019	Check_B73xMo17			HN	N	sp3	spb1	1309	1	3	09	rep2	94	81	26	16	14	28	12	13	22	10	5	8	31	13	27	8	7	6	8	0	6	14	10	13	11	7	8	11	3	5	0	19	59	38	30
HAV_5217	HAV_5217_S2_R1_001.fastq.gz	Y2019	Check_B73xMo17			HN	N	sp3	spb1	1309	1	3	09	rep3	48	51	11	6	16	9	9	7	8	24	31	34	11	4	12	0	0	0	0	0	0	0	0	0	0	0	0	0	0	0	0	22	26	30	29
HAV_5218	HAV_5218_S11_R1_001.fastq.gz	Y2019	Check_B73xMo17			HN	N	sp3	spb1	1312	1	3	12	rep1	71	54	14	18	21	19	23	8	24	20	6	13	27	6	22	8	10	19	9	15	9	25	11	22	14	8	13	21	3	12	0	0	0	0	0
HAV_5219	HAV_5219_S20_R1_001.fastq.gz	Y2019	Check_B73xMo17			HN	N	sp3	spb1	1312	1	3	12	rep2	80	78	17	12	29	29	28	14	26	7	8	11	23	16	25	0	0	0	0	0	0	0	0	0	0	0	0	0	0	0	0	0	0	64	0
HAV_5220	HAV_5220_S29_R1_001.fastq.gz	Y2019	Check_B73xMo17			HN	N	sp3	spb1	1312	1	3	12	rep3	130	154	25	34	44	56	43	36	55	0	0	0	62	13	63	0	0	0	0	0	0	0	0	0	0	0	0	0	0	0	26	29	27	40	40
HAV_5221	HAV_5221_S38_R1_001.fastq.gz	Y2019	CML254	PI 595542	ts	HN	N	sp3	spb1	1313	1	3	13	rep1	267	310	61	65	95	103	82	56	96	0	0	0	108	35	103	0	0	0	0	0	0	0	0	0	0	0	0	0	0	0	0	0	0	0	0
HAV_5222	HAV_5222_S46_R1_001.fastq.gz	Y2019	CML254	PI 595542	ts	HN	N	sp3	spb1	1313	1	3	13	rep2	200	253	64	59	79	79	62	54	63	10	5	18	87	34	78	9	8	0	0	0	10	11	8	13	14	6	10	6	0	12	0	0	0	0	0
HAV_5223	HAV_5223_S54_R1_001.fastq.gz	Y2019	CML254	PI 595542	ts	HN	N	sp3	spb1	1313	1	3	13	rep3	233	221	66	58	68	80	68	51	71	50	32	55	71	32	64	0	0	0	0	0	0	0	0	0	0	0	0	0	0	0	0	0	29	65	23
HAV_5224	HAV_5224_S62_R1_001.fastq.gz	Y2019	NC338	Ames 27165	ts	HN	N	sp3	spb2	1316	1	3	16	rep1	21	20	3	1	6	7	6	7	5	39	26	41	10	2	5	0	0	0	0	0	0	0	0	0	0	0	0	0	0	0	0	0	0	0	0
HAV_5225	HAV_5225_S3_R1_001.fastq.gz	Y2019	NC338	Ames 27165	ts	HN	N	sp3	spb2	1316	1	3	16	rep2	19	6	6	2	3	8	6	4	2	13	8	11	3	1	8	0	0	0	0	0	0	0	0	0	0	0	0	0	0	0	0	0	0	0	93
HAV_5226	HAV_5226_S12_R1_001.fastq.gz	Y2019	NC338	Ames 27165	ts	HN	N	sp3	spb2	1316	1	3	16	rep3	284	256	72	65	82	87	79	51	67	12	5	11	93	26	75	11	14	25	10	17	14	38	31	31	20	18	24	20	5	22	0	25	37	39	43
HAV_5227	HAV_5227_S21_R1_001.fastq.gz	Y2019	NC346	Ames 27169	ts	HN	N	sp3	spb2	1318	1	3	18	rep1	38	52	12	6	17	18	11	13	12	0	4	7	15	11	8	0	0	0	0	0	0	0	0	0	0	0	0	0	0	0	0	0	0	68	18
HAV_5228	HAV_5228_S30_R1_001.fastq.gz	Y2019	NC346	Ames 27169	ts	HN	N	sp3	spb2	1318	1	3	18	rep2	33	34	9	11	11	8	9	7	11	19	7	30	18	6	14	0	0	0	0	0	0	10	0	6	5	11	6	0	0	0	0	0	0	0	0
HAV_5229	HAV_5229_S39_R1_001.fastq.gz	Y2019	NC346	Ames 27169	ts	HN	N	sp3	spb2	1318	1	3	18	rep3	99	65	27	25	27	17	15	18	28	3	4	5	24	9	18	0	0	0	0	0	0	0	0	0	0	0	0	0	0	0	0	20	51	35	24
HAV_5230	HAV_5230_S47_R1_001.fastq.gz	Y2019	NC348	Ames 27170	ts	HN	N	sp3	spb2	1319	1	3	19	rep1	55	50	14	12	12	13	16	12	18	39	42	51	20	4	8	0	0	0	0	0	0	0	0	0	0	0	0	0	0	0	0	0	0	0	0
HAV_5231	HAV_5231_S55_R1_001.fastq.gz	Y2019	NC348	Ames 27170	ts	HN	N	sp3	spb2	1319	1	3	19	rep2	39	39	8	6	13	16	16	19	19	37	21	47	24	10	11	0	0	0	0	0	0	0	0	0	0	0	0	0	0	0	0	56	0	0	0
HAV_5232	HAV_5232_S63_R1_001.fastq.gz	Y2019	NC348	Ames 27170	ts	HN	N	sp3	spb2	1319	1	3	19	rep3	370	356	86	71	98	104	98	62	88	11	10	9	119	48	98	0	0	0	0	0	0	0	0	0	0	0	0	0	0	0	0	0	0	0	0
HAV_5233	HAV_5233_S4_R1_001.fastq.gz	Y2019	E2558W	Ames 27110	nss	HN	N	sp3	spb2	1322	1	3	22	rep1	26	18	6	8	10	7	9	2	6	38	17	41	5	1	5	0	0	0	0	0	0	0	0	0	0	0	0	0	0	0	57	39	63	77	65
HAV_5234	HAV_5234_S13_R1_001.fastq.gz	Y2019	E2558W	Ames 27110	nss	HN	N	sp3	spb2	1322	1	3	22	rep2	26	22	8	2	7	6	8	6	7	75	34	60	9	3	7	0	0	0	0	0	0	0	0	0	0	0	0	0	0	0	0	0	0	0	0
HAV_5235	HAV_5235_S22_R1_001.fastq.gz	Y2019	E2558W	Ames 27110	nss	HN	N	sp3	spb2	1322	1	3	22	rep3	19	25	8	4	8	12	10	6	6	48	41	62	8	4	5	0	0	0	0	0	0	0	0	0	0	0	0	0	0	0	0	0	0	0	0
HAV_5236	HAV_5236_S31_R1_001.fastq.gz	Y2019	Check_B73xMo17			HN	N	sp3	spb2	1323	1	3	23	rep1	64	74	17	15	29	29	29	18	25	13	9	19	32	10	23	0	0	0	0	0	0	0	0	0	0	0	0	0	0	0	48	65	48	84	74
HAV_5237	HAV_5237_S40_R1_001.fastq.gz	Y2019	Check_B73xMo17			HN	N	sp3	spb2	1323	1	3	23	rep2	155	130	34	36	32	27	34	25	35	50	32	52	49	16	42	0	0	0	0	0	0	0	0	0	0	0	0	0	0	0	0	0	0	0	89
HAV_5238	HAV_5238_S48_R1_001.fastq.gz	Y2019	Check_B73xMo17			HN	N	sp3	spb2	1323	1	3	23	rep3	28	23	8	7	8	6	9	8	10	34	19	36	14	6	14	0	0	0	0	0	0	0	0	0	0	0	0	0	0	0	0	0	0	58	0
HAV_5239	HAV_5239_S56_R1_001.fastq.gz	Y2019	NC320	Ames 27156	ts	HN	N	sp3	spb2	1325	1	3	25	rep1	763	792	195	196	227	255	212	134	263	0	0	0	263	113	220	0	0	0	0	0	0	0	0	0	0	0	0	0	0	0	0	0	0	49	0
HAV_5240	HAV_5240_S64_R1_001.fastq.gz	Y2019	NC320	Ames 27156	ts	HN	N	sp3	spb2	1325	1	3	25	rep2	299	327	92	103	123	126	95	75	105	0	0	0	118	46	114	0	0	0	0	0	0	0	0	0	0	0	0	0	0	0	0	0	0	0	0
HAV_5241	HAV_5241_S5_R1_001.fastq.gz	Y2019	NC320	Ames 27156	ts	HN	N	sp3	spb2	1325	1	3	25	rep3	229	273	61	68	79	94	73	39	80	15	9	24	86	43	65	0	0	0	0	0	0	0	0	0	0	0	0	0	0	0	0	0	0	0	0
HAV_5242	HAV_5242_S14_R1_001.fastq.gz	Y2019	DE811	PI 550558	mixed	HN	N	sp3	spb2	1327	1	3	27	rep1	313	341	89	56	117	103	104	75	103	20	20	46	124	27	100	0	0	0	0	0	0	0	0	0	0	0	0	0	0	0	157	145	156	230	169
HAV_5243	HAV_5243_S23_R1_001.fastq.gz	Y2019	DE811	PI 550558	mixed	HN	N	sp3	spb2	1327	1	3	27	rep2	88	88	20	16	17	32	21	9	21	83	37	89	35	4	28	6	5	0	0	9	7	10	8	11	7	10	11	11	0	8	0	0	0	57	22
HAV_5244	HAV_5244_S32_R1_001.fastq.gz	Y2019	DE811	PI 550558	mixed	HN	N	sp3	spb2	1327	1	3	27	rep3	220	221	58	47	80	67	50	48	74	0	4	6	80	37	83	0	0	0	0	0	0	0	0	0	0	0	0	0	0	0	52	31	45	57	56
HAV_5245	HAV_5245_S41_R1_001.fastq.gz	Y2019	KI2021	Ames 27129	ts	HN	N	sp3	spb3	1330	1	3	30	rep1	29	21	4	0	19	4	6	0	9	0	0	0	9	0	11	0	0	0	0	0	0	0	0	0	0	0	0	0	0	0	228	206	238	335	253
HAV_5246	HAV_5246_S49_R1_001.fastq.gz	Y2019	KI2021	Ames 27129	ts	HN	N	sp3	spb3	1330	1	3	30	rep2	0	0	0	0	0	0	0	0	0	0	0	0	0	0	0	0	0	0	0	0	0	0	0	0	0	0	0	0	0	0	331	322	437	499	473
HAV_5247	HAV_5247_S57_R1_001.fastq.gz	Y2019	KI2021	Ames 27129	ts	HN	N	sp3	spb3	1330	1	3	30	rep3	67	64	26	15	17	19	13	13	20	7	4	6	25	9	23	0	0	0	0	0	0	0	0	0	0	0	0	0	0	0	238	270	338	371	362
HAV_5248	HAV_5248_S65_R1_001.fastq.gz	Y2019	Check_B73xMo17			HN	N	sp3	spb3	1331	1	3	31	rep1	0	89	0	0	0	0	0	0	0	0	0	0	0	0	0	0	0	0	0	0	0	0	0	0	0	0	0	0	0	0	31	0	55	59	31
HAV_5249	HAV_5249_S6_R1_001.fastq.gz	Y2019	Check_B73xMo17			HN	N	sp3	spb3	1331	1	3	31	rep2	0	0	0	0	0	0	0	0	0	0	0	0	0	0	0	0	0	0	0	0	0	0	0	0	0	0	0	0	0	0	55	51	61	87	86
HAV_5250	HAV_5250_S15_R1_001.fastq.gz	Y2019	Check_B73xMo17			HN	N	sp3	spb3	1331	1	3	31	rep3	138	139	30	41	28	58	25	31	35	22	11	15	41	16	33	0	0	0	0	0	0	0	0	0	0	0	0	0	0	0	0	0	38	70	73
HAV_5251	HAV_5251_S24_R1_001.fastq.gz	Y2019	TZI25	PI 506255	mixed	HN	N	sp3	spb3	1333	1	3	33	rep1	0	94	0	53	27	0	0	12	21	0	0	0	38	0	58	0	0	0	0	0	0	0	0	0	0	0	0	0	0	0	0	0	0	0	0
HAV_5252	HAV_5252_S33_R1_001.fastq.gz	Y2019	TZI25	PI 506255	mixed	HN	N	sp3	spb3	1333	1	3	33	rep2	277	279	64	61	84	83	70	76	81	0	0	0	90	37	67	0	0	0	0	0	0	0	0	0	0	0	0	0	0	0	0	0	0	0	0
HAV_5253	HAV_5253_S42_R1_001.fastq.gz	Y2019	TZI25	PI 506255	mixed	HN	N	sp3	spb3	1333	1	3	33	rep3	142	141	40	34	41	42	42	19	40	38	28	36	52	14	41	0	0	0	0	0	0	0	0	0	0	0	0	0	0	0	177	174	217	291	248
HAV_5254	HAV_5254_S50_R1_001.fastq.gz	Y2019	Check_B73xMo17			HN	N	sp3	spb3	1335	1	3	35	rep1	61	70	11	30	24	37	25	19	24	60	58	77	20	6	21	0	0	0	0	0	0	0	0	0	0	0	0	0	0	0	0	0	74	0	0
HAV_5255	HAV_5255_S58_R1_001.fastq.gz	Y2019	Check_B73xMo17			HN	N	sp3	spb3	1335	1	3	35	rep2	78	78	18	19	30	32	26	23	31	42	24	38	29	10	30	5	0	7	2	0	0	7	11	8	5	0	0	4	0	6	78	0	0	0	0
HAV_5256	HAV_5256_S66_R1_001.fastq.gz	Y2019	Check_B73xMo17			HN	N	sp3	spb3	1335	1	3	35	rep3	115	108	33	29	40	34	26	19	27	2	7	13	41	24	41	0	0	0	0	0	0	0	0	0	0	0	0	0	0	0	20	0	0	58	26
HAV_5257	HAV_5257_S7_R1_001.fastq.gz	Y2019	TZI8	PI 506246	ts	HN	N	sp3	spb3	1337	1	3	37	rep1	41	40	14	13	13	16	14	7	11	4	2	12	15	5	10	0	0	0	0	0	0	0	0	0	0	0	0	0	0	0	32	0	27	55	43
HAV_5258	HAV_5258_S16_R1_001.fastq.gz	Y2019	TZI8	PI 506246	ts	HN	N	sp3	spb3	1337	1	3	37	rep2	107	109	22	22	32	31	24	18	36	53	33	69	38	9	31	0	0	0	0	0	0	0	0	0	0	0	0	0	0	0	0	0	0	117	0
HAV_5259	HAV_5259_S25_R1_001.fastq.gz	Y2019	TZI8	PI 506246	ts	HN	N	sp3	spb3	1337	1	3	37	rep3	128	141	43	38	38	60	53	34	35	15	16	20	57	20	44	0	0	0	0	0	0	0	0	8	0	0	0	5	0	0	0	0	0	0	0
HAV_5260	HAV_5260_S34_R1_001.fastq.gz	Y2019	HY	Ames 26808	nss	HN	N	sp3	spb3	1340	1	3	40	rep1	58	49	20	6	13	14	9	11	12	2	0	8	23	6	9	0	0	0	0	0	0	0	0	0	0	0	0	0	0	0	269	265	335	411	385
HAV_5261	HAV_5261_S43_R1_001.fastq.gz	Y2019	HY	Ames 26808	nss	HN	N	sp3	spb3	1340	1	3	40	rep2	5	7	0	0	0	0	0	0	0	5	10	14	0	0	0	0	0	0	0	0	0	0	0	0	0	0	0	0	0	0	0	0	0	0	0
HAV_5262	HAV_5262_S51_R1_001.fastq.gz	Y2019	HY	Ames 26808	nss	HN	N	sp3	spb3	1340	1	3	40	rep3	47	53	16	5	10	12	9	10	11	64	34	49	12	8	8	9	14	6	13	13	12	12	18	27	17	13	11	18	3	7	47	51	58	96	52
HAV_5263	HAV_5263_S59_R1_001.fastq.gz	Y2019	PA91	PI 587147	nss	HN	N	sp3	spb3	1342	1	3	42	rep1	142	116	21	33	32	37	33	21	35	19	18	11	41	7	36	0	0	0	0	0	0	0	0	0	0	0	0	5	0	0	0	63	0	0	0
HAV_5264	HAV_5264_S67_R1_001.fastq.gz	Y2019	PA91	PI 587147	nss	HN	N	sp3	spb3	1342	1	3	42	rep2	329	309	96	71	97	120	100	55	109	22	11	18	99	25	90	0	0	0	0	0	0	10	0	12	0	9	0	0	0	0	0	0	0	66	0
HAV_5265	HAV_5265_S8_R1_001.fastq.gz	Y2019	PA91	PI 587147	nss	HN	N	sp3	spb3	1342	1	3	42	rep3	490	468	112	97	134	157	116	96	143	21	24	35	155	60	146	0	0	0	0	0	0	0	0	0	0	0	0	0	0	0	90	85	95	155	125
HAV_5266	HAV_5266_S17_R1_001.fastq.gz	Y2019	A679	PI 587142	ss	HN	N	sp4	spb1	1344	1	3	44	rep1	63	90	18	15	22	30	18	8	26	38	29	38	18	12	24	0	0	0	0	0	0	0	0	2	0	0	0	0	0	0	44	45	60	71	56
HAV_5267	HAV_5267_S26_R1_001.fastq.gz	Y2019	A679	PI 587142	ss	HN	N	sp4	spb1	1344	1	3	44	rep2	84	90	23	27	30	39	29	21	21	52	49	68	44	15	34	0	0	0	0	0	0	0	0	0	0	0	0	0	0	0	0	0	0	95	0
HAV_5268	HAV_5268_S35_R1_001.fastq.gz	Y2019	A679	PI 587142	ss	HN	N	sp4	spb1	1344	1	3	44	rep3	187	232	42	47	81	59	61	36	43	38	31	56	79	19	51	0	4	0	0	0	3	8	6	9	3	11	3	0	0	3	60	58	47	78	57
HAV_5269	HAV_5269_S44_R1_001.fastq.gz	Y2019	B46	PI 550469	mixed	HN	N	sp4	spb1	1346	1	3	46	rep1	84	90	19	16	28	24	28	17	30	50	19	43	31	8	19	0	0	0	0	0	0	0	0	0	0	0	0	0	0	0	0	0	0	79	0
HAV_5270	HAV_5270_S52_R1_001.fastq.gz	Y2019	B46	PI 550469	mixed	HN	N	sp4	spb1	1346	1	3	46	rep2	33	45	10	12	14	13	15	8	14	32	25	28	10	5	11	0	0	0	0	0	0	0	0	0	0	0	0	0	0	0	0	0	0	85	0
HAV_5271	HAV_5271_S60_R1_001.fastq.gz	Y2019	B46	PI 550469	mixed	HN	N	sp4	spb1	1346	1	3	46	rep3	36	41	12	2	19	15	9	11	10	90	70	106	12	2	7	18	29	30	15	22	21	27	27	32	22	22	25	31	12	25	0	0	0	0	0
HAV_5272	HAV_5272_S68_R1_001.fastq.gz	Y2019	H91	Ames 27114	ss	HN	N	sp4	spb1	1347	1	3	47	rep1	20	30	7	8	7	6	12	7	8	12	11	28	5	6	2	16	16	12	15	16	13	21	30	31	15	15	21	21	8	26	677	698	815	1075	941
HAV_5273	HAV_5273_S69_R1_001.fastq.gz	Y2019	H91	Ames 27114	ss	HN	N	sp4	spb1	1347	1	3	47	rep2	45	43	10	10	9	19	22	5	6	0	0	0	25	8	10	0	0	0	0	0	0	0	0	0	0	0	0	0	0	0	62	52	87	101	100
HAV_5274	HAV_5274_S77_R1_001.fastq.gz	Y2019	H91	Ames 27114	ss	HN	N	sp4	spb1	1347	1	3	47	rep3	16	17	2	3	4	3	5	2	2	37	23	43	4	1	4	0	0	0	0	0	0	0	0	0	0	0	0	0	0	0	0	49	40	31	24
HAV_5275	HAV_5275_S85_R1_001.fastq.gz	Y2019	B14A	PI 550461	ss	HN	N	sp4	spb1	1350	1	3	50	rep1	69	68	19	20	24	22	19	23	19	8	2	4	30	11	28	0	0	0	0	0	0	0	0	0	0	0	0	0	0	0	51	40	61	71	57
HAV_5276	HAV_5276_S93_R1_001.fastq.gz	Y2019	B14A	PI 550461	ss	HN	N	sp4	spb1	1350	1	3	50	rep2	45	53	14	12	15	14	9	12	13	35	18	47	17	3	9	3	5	6	5	12	3	4	8	17	6	8	10	11	6	12	268	294	306	419	399
HAV_5277	HAV_5277_S101_R1_001.fastq.gz	Y2019	B14A	PI 550461	ss	HN	N	sp4	spb1	1350	1	3	50	rep3	54	38	20	14	11	14	9	15	16	6	3	6	20	4	11	0	0	0	0	0	0	0	0	0	0	0	0	0	0	0	106	95	116	157	115
HAV_5278	HAV_5278_S108_R1_001.fastq.gz	Y2019	A680	Ames 23503	ss	HN	N	sp4	spb1	1351	1	3	51	rep1	37	46	15	15	16	15	12	7	6	5	5	7	12	0	17	0	0	0	0	0	0	0	0	0	0	0	0	0	0	0	168	135	163	213	202
HAV_5279	HAV_5279_S115_R1_001.fastq.gz	Y2019	A680	Ames 23503	ss	HN	N	sp4	spb1	1351	1	3	51	rep2	87	92	42	15	32	29	22	20	31	0	0	0	24	12	24	0	0	0	0	0	0	0	0	0	0	0	0	0	0	0	189	184	209	297	208
HAV_5280	HAV_5280_S122_R1_001.fastq.gz	Y2019	A680	Ames 23503	ss	HN	N	sp4	spb1	1351	1	3	51	rep3	86	61	26	20	23	18	26	19	24	16	17	31	36	14	25	0	0	0	0	0	0	2	0	7	0	0	0	7	0	7	141	117	154	207	145
HAV_5281	HAV_5281_S70_R1_001.fastq.gz	Y2019	B73	PI 550473	ss	HN	N	sp4	spb1	1354	1	3	54	rep1	51	47	5	5	11	19	13	12	17	3	2	6	11	5	14	8	6	5	6	15	4	12	12	7	9	8	11	4	0	7	0	0	0	57	0
HAV_5282	HAV_5282_S78_R1_001.fastq.gz	Y2019	B73	PI 550473	ss	HN	N	sp4	spb1	1354	1	3	54	rep2	82	99	20	16	23	22	26	15	18	11	16	7	16	9	19	0	2	0	0	0	3	5	10	7	5	5	8	6	0	8	0	0	0	0	0
HAV_5283	HAV_5283_S86_R1_001.fastq.gz	Y2019	B73	PI 550473	ss	HN	N	sp4	spb1	1354	1	3	54	rep3	113	136	21	25	26	43	33	19	36	17	11	23	47	12	28	0	0	0	0	0	0	0	0	0	0	0	0	0	0	0	0	0	0	0	0
HAV_5284	HAV_5284_S4_R1_001.fastq.gz	Y2019	4226	NSL 30904	nss	HN	N	sp4	spb1	1356	1	3	56	rep1	22	41	12	8	9	13	13	10	8	20	13	16	12	8	13	0	0	0	0	0	0	0	0	0	0	0	0	0	0	0	145	130	169	222	218
HAV_5285	HAV_5285_S102_R1_001.fastq.gz	Y2019	4226	NSL 30904	nss	HN	N	sp4	spb1	1356	1	3	56	rep2	138	133	38	31	30	45	50	30	31	39	24	41	42	13	45	0	0	0	0	0	0	0	0	0	0	0	0	0	0	0	45	40	49	68	37
HAV_5286	HAV_5286_S109_R1_001.fastq.gz	Y2019	4226	NSL 30904	nss	HN	N	sp4	spb1	1356	1	3	56	rep3	46	42	8	12	10	9	7	12	10	46	33	51	13	7	9	0	0	0	0	0	0	0	0	0	0	0	0	0	0	0	85	91	103	139	114
HAV_5287	HAV_5287_S116_R1_001.fastq.gz	Y2019	Check_B73xMo17			HN	N	sp4	spb2	1358	1	3	58	rep1	67	62	15	12	4	22	19	7	27	6	4	7	32	17	17	0	0	0	0	0	0	0	0	0	0	0	0	0	0	0	71	79	88	106	99
HAV_5288	HAV_5288_S123_R1_001.fastq.gz	Y2019	Check_B73xMo17			HN	N	sp4	spb2	1358	1	3	58	rep2	63	58	8	17	19	15	22	15	19	3	7	4	26	7	19	0	0	0	0	0	0	9	2	0	4	0	4	0	0	10	49	0	0	0	0
HAV_5289	HAV_5289_S71_R1_001.fastq.gz	Y2019	Check_B73xMo17			HN	N	sp4	spb2	1358	1	3	58	rep3	111	119	33	36	30	29	37	33	28	14	8	22	31	13	37	0	0	0	0	0	0	0	0	0	0	0	0	0	0	0	0	0	0	87	0
HAV_5290	HAV_5290_S79_R1_001.fastq.gz	Y2019	NC294	Ames 27143	ss	HN	N	sp4	spb2	1360	1	3	60	rep1	90	68	23	13	26	27	23	10	12	3	1	7	13	8	29	0	0	0	0	0	0	0	0	0	0	0	0	0	0	0	0	0	0	138	0
HAV_5291	HAV_5291_S87_R1_001.fastq.gz	Y2019	NC294	Ames 27143	ss	HN	N	sp4	spb2	1360	1	3	60	rep2	66	71	11	14	16	29	18	19	9	3	1	3	36	6	19	0	0	0	0	0	0	0	0	0	0	0	0	0	0	0	0	0	0	0	0
HAV_5292	HAV_5292_S95_R1_001.fastq.gz	Y2019	NC294	Ames 27143	ss	HN	N	sp4	spb2	1360	1	3	60	rep3	50	48	11	10	12	15	15	5	16	2	2	4	20	6	10	0	0	0	0	0	0	0	0	0	0	0	0	0	0	0	21	25	20	36	17
HAV_5296	HAV_5296_S124_R1_001.fastq.gz	Y2019	NC362	Ames 27177	mixed	HN	N	sp4	spb2	1363	1	3	63	rep1	40	41	23	16	18	13	17	13	29	0	0	0	19	0	25	0	0	0	0	0	0	0	0	0	0	0	0	0	0	0	90	0	0	36	28
HAV_5297	HAV_5297_S72_R1_001.fastq.gz	Y2019	NC362	Ames 27177	mixed	HN	N	sp4	spb2	1363	1	3	63	rep2	78	71	18	23	29	27	32	11	33	7	4	7	15	16	22	8	5	6	4	5	0	14	12	11	5	6	11	7	0	7	0	0	0	0	0
HAV_5298	HAV_5298_S80_R1_001.fastq.gz	Y2019	NC362	Ames 27177	mixed	HN	N	sp4	spb2	1363	1	3	63	rep3	172	184	40	48	63	50	63	37	60	40	24	34	60	24	55	27	23	23	19	18	18	33	35	31	23	22	27	31	14	23	0	0	0	0	0
HAV_5299	HAV_5299_S88_R1_001.fastq.gz	Y2019	PA880	PI 517974	nss	HN	N	sp4	spb2	1366	1	3	66	rep1	18	22	2	6	5	11	7	3	10	6	13	12	4	3	6	0	0	0	0	0	0	0	0	0	0	0	0	0	0	0	0	0	0	0	0
HAV_5300	HAV_5300_S96_R1_001.fastq.gz	Y2019	PA880	PI 517974	nss	HN	N	sp4	spb2	1366	1	3	66	rep2	57	66	22	19	21	24	18	18	25	79	46	87	22	6	28	5	9	9	0	0	0	7	12	13	0	0	6	4	0	5	39	37	42	71	57
HAV_5301	HAV_5301_S103_R1_001.fastq.gz	Y2019	PA880	PI 517974	nss	HN	N	sp4	spb2	1366	1	3	66	rep3	68	68	22	21	28	33	21	12	22	38	25	38	27	14	34	0	0	0	0	0	0	0	0	0	0	0	0	0	0	0	45	49	43	66	76
HAV_5302	HAV_5302_S110_R1_001.fastq.gz	Y2019	R177	NSL 30894	nss	HN	N	sp4	spb2	1367	1	3	67	rep1	127	134	41	35	45	41	34	24	43	24	21	22	36	19	33	10	0	4	6	0	3	9	14	16	11	9	6	8	0	12	80	0	0	0	0
HAV_5303	HAV_5303_S117_R1_001.fastq.gz	Y2019	R177	NSL 30894	nss	HN	N	sp4	spb2	1367	1	3	67	rep2	41	30	9	10	8	12	9	11	10	87	50	82	13	5	9	8	3	11	12	0	9	13	12	13	16	10	6	8	6	16	0	0	0	0	0
HAV_5304	HAV_5304_S125_R1_001.fastq.gz	Y2019	R177	NSL 30894	nss	HN	N	sp4	spb2	1367	1	3	67	rep3	193	199	60	33	60	52	64	46	40	12	7	21	70	32	51	6	0	0	0	0	0	8	6	7	0	4	8	0	0	3	0	0	0	27	25
HAV_5305	HAV_5305_S73_R1_001.fastq.gz	Y2019	MO17	PI 558532	nss	HN	N	sp4	spb2	1369	1	3	69	rep1	13	7	3	3	4	5	3	1	2	21	25	18	2	1	4	5	0	0	0	0	0	5	0	8	0	9	0	4	0	0	0	29	0	40	25
HAV_5306	HAV_5306_S81_R1_001.fastq.gz	Y2019	MO17	PI 558532	nss	HN	N	sp4	spb2	1369	1	3	69	rep2	83	104	19	24	17	24	31	19	19	4	11	3	30	7	21	0	0	0	0	0	0	0	0	0	0	0	0	0	0	0	0	0	117	0	0
HAV_5307	HAV_5307_S89_R1_001.fastq.gz	Y2019	MO17	PI 558532	nss	HN	N	sp4	spb2	1369	1	3	69	rep3	16	14	4	4	6	4	2	6	4	45	26	64	3	0	3	0	0	0	0	0	0	0	0	0	0	0	0	0	0	0	0	91	0	0	0
HAV_5308	HAV_5308_S97_R1_001.fastq.gz	Y2019	CI44	CIze 44	nss	HN	N	sp4	spb3	1371	1	3	71	rep1	11	14	7	8	5	5	2	1	4	42	20	36	4	2	5	0	0	0	0	0	0	0	0	0	0	0	0	0	0	0	0	0	0	0	0
HAV_5309	HAV_5309_S104_R1_001.fastq.gz	Y2019	CI44	CIze 44	nss	HN	N	sp4	spb3	1371	1	3	71	rep2	11	10	2	6	9	2	1	1	2	44	34	40	3	0	1	0	0	0	0	0	0	0	0	0	0	0	0	0	0	0	0	0	0	90	0
HAV_5310	HAV_5310_S111_R1_001.fastq.gz	Y2019	CI44	CIze 44	nss	HN	N	sp4	spb3	1371	1	3	71	rep3	144	134	32	24	41	41	49	21	33	13	12	23	43	14	37	0	0	0	0	3	0	0	0	8	0	6	0	11	0	7	0	0	0	0	0
HAV_5311	HAV_5311_S118_R1_001.fastq.gz	Y2019	Check_B73xMo17			HN	N	sp4	spb3	1374	1	3	74	rep1	99	137	27	20	29	34	46	34	34	29	15	15	54	19	29	9	11	14	10	9	14	20	19	20	13	11	9	15	6	4	0	0	0	37	0
HAV_5312	HAV_5312_S126_R1_001.fastq.gz	Y2019	Check_B73xMo17			HN	N	sp4	spb3	1374	1	3	74	rep2	139	150	36	33	44	58	40	24	38	32	17	45	46	25	48	10	6	8	12	7	11	10	7	20	13	13	8	7	6	6	0	0	0	0	0
HAV_5313	HAV_5313_S74_R1_001.fastq.gz	Y2019	Check_B73xMo17			HN	N	sp4	spb3	1374	1	3	74	rep3	124	84	33	17	32	35	29	22	31	13	3	13	39	11	19	0	0	0	0	0	0	0	0	0	0	0	0	0	0	0	16	27	24	41	37
HAV_5314	HAV_5314_S82_R1_001.fastq.gz	Y2019	A214N	Ames 31536	mixed	HN	N	sp4	spb3	1375	1	3	75	rep1	65	84	31	16	14	24	25	5	24	9	1	5	32	8	19	2	4	0	0	9	5	9	10	10	2	7	11	6	0	11	0	0	0	0	0
HAV_5315	HAV_5315_S90_R1_001.fastq.gz	Y2019	A214N	Ames 31536	mixed	HN	N	sp4	spb3	1375	1	3	75	rep2	68	81	16	15	22	10	8	10	20	64	28	69	15	10	17	26	27	16	13	13	18	29	15	27	21	25	19	22	7	18	0	81	0	0	0
HAV_5316	HAV_5316_S98_R1_001.fastq.gz	Y2019	A214N	Ames 31536	mixed	HN	N	sp4	spb3	1375	1	3	75	rep3	52	45	12	11	14	17	16	13	14	5	1	4	20	8	15	0	0	0	0	0	0	0	0	0	0	0	0	0	0	0	0	0	0	0	0
HAV_5317	HAV_5317_S105_R1_001.fastq.gz	Y2019	CO109	PI 587125	nss	HN	N	sp4	spb3	1378	1	3	78	rep1	56	61	23	18	18	18	15	11	23	46	26	49	18	5	24	5	5	10	7	0	11	12	10	14	7	10	5	5	0	5	55	72	69	91	90
HAV_5318	HAV_5318_S112_R1_001.fastq.gz	Y2019	CO109	PI 587125	nss	HN	N	sp4	spb3	1378	1	3	78	rep2	160	225	40	40	45	62	48	42	57	38	23	35	61	24	57	10	11	10	5	9	12	19	16	15	15	9	19	8	5	10	141	131	172	228	173
HAV_5319	HAV_5319_S119_R1_001.fastq.gz	Y2019	CO109	PI 587125	nss	HN	N	sp4	spb3	1378	1	3	78	rep3	23	31	8	7	10	9	9	5	9	15	16	24	11	2	11	0	0	0	0	0	0	0	0	0	0	0	0	0	0	0	0	0	30	55	49
HAV_5320	HAV_5320_S127_R1_001.fastq.gz	Y2019	38-11	Ames 31535	nss	HN	N	sp4	spb3	1380	1	3	80	rep1	19	26	11	13	4	16	14	6	6	54	27	66	6	7	7	4	6	0	0	10	0	7	10	11	10	6	9	15	0	5	39	40	51	66	52
HAV_5321	HAV_5321_S75_R1_001.fastq.gz	Y2019	38-11	Ames 31535	nss	HN	N	sp4	spb3	1380	1	3	80	rep2	87	67	13	13	23	27	16	21	21	12	16	13	28	15	19	0	0	0	6	0	0	0	0	11	0	3	0	9	0	0	33	0	0	79	21
HAV_5322	HAV_5322_S83_R1_001.fastq.gz	Y2019	38-11	Ames 31535	nss	HN	N	sp4	spb3	1380	1	3	80	rep3	40	47	8	5	6	19	12	10	14	113	85	128	13	5	14	4	0	0	0	0	0	7	7	4	9	3	5	6	0	5	0	0	0	0	0
HAV_5323	HAV_5323_S91_R1_001.fastq.gz	Y2019	C49	Ames 28290	nss	HN	N	sp4	spb3	1382	1	3	82	rep1	39	33	15	8	15	4	14	5	4	8	7	9	13	9	13	0	0	0	0	0	0	0	0	0	0	0	0	0	0	0	40	0	0	63	79
HAV_5324	HAV_5324_S99_R1_001.fastq.gz	Y2019	C49	Ames 28290	nss	HN	N	sp4	spb3	1382	1	3	82	rep2	66	94	16	10	20	22	20	13	13	1	0	5	25	7	16	7	12	9	11	7	9	18	14	12	7	9	15	12	3	9	52	47	47	65	52
HAV_5325	HAV_5325_S106_R1_001.fastq.gz	Y2019	C49	Ames 28290	nss	HN	N	sp4	spb3	1382	1	3	82	rep3	124	134	28	28	36	40	27	22	36	16	7	13	34	8	33	0	0	0	0	0	0	0	0	0	0	0	0	0	0	0	89	0	0	50	0
HAV_5326	HAV_5326_S113_R1_001.fastq.gz	Y2019	T8	PI 550518	nss	HN	N	sp4	spb3	1383	1	3	83	rep1	105	89	39	22	49	42	43	31	30	33	21	35	56	18	40	21	22	13	14	8	9	16	15	24	7	20	17	21	7	18	0	0	0	0	0
HAV_5327	HAV_5327_S120_R1_001.fastq.gz	Y2019	T8	PI 550518	nss	HN	N	sp4	spb3	1383	1	3	83	rep2	157	168	48	48	67	69	56	36	44	13	12	23	67	19	67	0	0	0	0	0	0	0	7	9	6	0	0	8	0	8	0	0	0	40	0
HAV_5328	HAV_5328_S128_R1_001.fastq.gz	Y2019	T8	PI 550518	nss	HN	N	sp4	spb3	1383	1	3	83	rep3	60	55	16	12	17	24	12	19	19	21	18	22	20	6	18	0	0	0	0	0	0	0	0	0	0	0	0	3	0	0	0	0	0	69	0
HAV_5329	HAV_5329_S76_R1_001.fastq.gz	Y2019	CML314	Ames 27094	ts	HN	N	sp3	spb1	1402	1	4	02	rep1	59	60	18	19	26	15	23	17	18	7	7	8	18	19	23	0	5	9	4	0	5	7	14	8	11	10	14	11	0	5	0	0	0	107	0
HAV_5330	HAV_5330_S84_R1_001.fastq.gz	Y2019	CML314	Ames 27094	ts	HN	N	sp3	spb1	1402	1	4	02	rep2	137	169	40	45	54	64	62	38	50	15	5	7	66	22	47	0	0	0	0	0	0	0	0	0	0	0	0	0	0	0	0	0	0	0	0
HAV_5331	HAV_5331_S92_R1_001.fastq.gz	Y2019	CML314	Ames 27094	ts	HN	N	sp3	spb1	1402	1	4	02	rep3	36	41	15	14	14	6	17	14	10	17	12	21	15	7	17	0	0	0	0	0	0	0	0	0	0	4	0	6	0	0	0	0	0	0	0
HAV_5332	HAV_5332_S100_R1_001.fastq.gz	Y2019	Check_B73xMo17			HN	N	sp3	spb1	1404	1	4	04	rep1	72	102	28	15	35	22	24	13	24	32	19	19	29	14	28	0	0	0	0	0	0	0	0	0	0	0	0	0	0	0	0	0	87	0	0
HAV_5333	HAV_5333_S107_R1_001.fastq.gz	Y2019	Check_B73xMo17			HN	N	sp3	spb1	1404	1	4	04	rep2	46	41	12	10	12	14	13	9	8	17	3	10	21	5	15	0	0	0	0	0	0	0	0	0	0	0	0	0	0	0	0	0	0	0	0
HAV_5334	HAV_5334_S114_R1_001.fastq.gz	Y2019	Check_B73xMo17			HN	N	sp3	spb1	1404	1	4	04	rep3	56	64	23	12	25	19	16	14	18	8	12	17	16	9	20	10	6	0	0	0	0	9	8	11	3	5	8	9	0	7	0	79	28	0	0
HAV_5335	HAV_5335_S121_R1_001.fastq.gz	Y2019	CML218	Ames 27086	mixed	HN	N	sp3	spb1	1405	1	4	05	rep1	42	59	12	16	22	25	17	13	10	82	52	111	18	9	18	0	0	0	0	0	0	0	0	0	10	0	0	8	0	0	0	0	59	0	0
HAV_5336	HAV_5336_S129_R1_001.fastq.gz	Y2019	CML218	Ames 27086	mixed	HN	N	sp3	spb1	1405	1	4	05	rep2	101	98	27	33	37	39	27	21	37	46	29	54	47	8	31	0	0	0	0	0	0	0	0	0	0	0	0	0	0	0	0	0	0	45	0
HAV_5337	HAV_5337_S1_R1_001.fastq.gz	Y2019	CML218	Ames 27086	mixed	HN	N	sp3	spb1	1405	1	4	05	rep3	285	296	55	72	91	94	76	52	91	17	11	22	113	35	85	0	0	0	0	0	0	0	0	0	0	0	0	0	0	0	0	0	0	0	155
HAV_5338	HAV_5338_S10_R1_001.fastq.gz	Y2019	CML103	Ames 27081	ts	HN	N	sp3	spb1	1407	1	4	07	rep1	108	110	29	20	41	35	31	26	20	18	8	12	43	20	31	0	0	0	0	0	0	0	0	0	0	0	0	0	0	0	25	26	34	51	43
HAV_5339	HAV_5339_S19_R1_001.fastq.gz	Y2019	CML103	Ames 27081	ts	HN	N	sp3	spb1	1407	1	4	07	rep2	67	56	12	9	19	16	21	16	21	10	6	13	21	6	15	0	0	0	0	0	0	0	0	0	0	0	0	0	0	0	436	427	495	631	566
HAV_5340	HAV_5340_S28_R1_001.fastq.gz	Y2019	CML103	Ames 27081	ts	HN	N	sp3	spb1	1407	1	4	07	rep3	40	42	10	13	10	14	13	4	10	34	16	30	18	7	10	0	0	0	0	0	0	0	0	0	0	0	0	0	0	0	28	46	58	66	59
HAV_5341	HAV_5341_S5_R1_001.fastq.gz	Y2019	Check_B73xMo17			HN	N	sp3	spb1	1410	1	4	10	rep1	46	55	14	9	15	11	10	16	12	6	14	16	8	13	22	0	0	0	0	0	0	0	0	3	0	4	0	0	0	0	32	40	0	14	50
HAV_5342	HAV_5342_S45_R1_001.fastq.gz	Y2019	Check_B73xMo17			HN	N	sp3	spb1	1410	1	4	10	rep2	29	31	10	5	5	7	6	12	14	17	14	28	10	3	6	0	10	10	0	5	0	9	5	8	0	0	5	0	0	7	0	0	0	0	137
HAV_5343	HAV_5343_S53_R1_001.fastq.gz	Y2019	Check_B73xMo17			HN	N	sp3	spb1	1410	1	4	10	rep3	99	81	22	31	36	53	27	21	26	17	10	27	24	18	28	0	0	0	0	0	0	0	0	0	0	0	0	0	0	0	0	0	0	0	0
HAV_5344	HAV_5344_S61_R1_001.fastq.gz	Y2019	CML261	Ames 27091	ts	HN	N	sp3	spb1	1411	1	4	11	rep1	43	50	9	12	13	14	18	4	9	101	73	122	21	13	11	0	0	0	0	0	0	6	0	0	0	0	0	0	0	0	0	0	0	66	0
HAV_5345	HAV_5345_S2_R1_001.fastq.gz	Y2019	CML261	Ames 27091	ts	HN	N	sp3	spb1	1411	1	4	11	rep2	58	57	20	20	21	22	11	12	22	2	1	13	24	6	15	0	0	0	0	0	0	0	0	0	0	0	0	0	0	0	0	0	0	0	0
HAV_5346	HAV_5346_S11_R1_001.fastq.gz	Y2019	CML261	Ames 27091	ts	HN	N	sp3	spb1	1411	1	4	11	rep3	22	27	2	4	9	14	9	8	7	26	12	24	5	3	12	0	0	0	0	0	0	0	0	0	0	0	0	0	0	0	0	0	0	0	0
HAV_5347	HAV_5347_S20_R1_001.fastq.gz	Y2019	4722	PI 587130	popcorn	HN	N	sp3	spb1	1413	1	4	13	rep1	54	38	16	15	20	20	16	7	12	18	11	15	28	2	16	0	0	0	0	0	0	0	0	0	0	0	0	0	0	0	48	54	54	71	71
HAV_5348	HAV_5348_S6_R1_001.fastq.gz	Y2019	4722	PI 587130	popcorn	HN	N	sp3	spb1	1413	1	4	13	rep2	54	50	11	12	10	8	15	14	21	9	5	12	15	5	9	0	0	0	0	0	0	0	0	0	0	0	0	0	0	0	26	39	41	60	58
HAV_5349	HAV_5349_S7_R1_001.fastq.gz	Y2019	4722	PI 587130	popcorn	HN	N	sp3	spb1	1413	1	4	13	rep3	60	70	10	17	24	19	24	14	26	44	34	64	18	12	19	0	0	0	0	0	0	0	0	2	4	0	0	0	0	0	0	0	0	0	118
HAV_5350	HAV_5350_S46_R1_001.fastq.gz	Y2019	M162W	Ames 27134	nss	HN	N	sp3	spb2	1416	1	4	16	rep1	26	16	12	6	5	6	6	5	14	79	52	75	5	2	9	5	6	0	0	0	5	4	11	0	12	7	8	9	0	2	0	0	0	47	0
HAV_5351	HAV_5351_S54_R1_001.fastq.gz	Y2019	M162W	Ames 27134	nss	HN	N	sp3	spb2	1416	1	4	16	rep2	56	73	15	16	24	16	12	19	20	27	20	50	21	7	16	0	0	0	0	0	0	14	0	0	0	0	0	0	0	0	60	63	76	96	79
HAV_5352	HAV_5352_S62_R1_001.fastq.gz	Y2019	M162W	Ames 27134	nss	HN	N	sp3	spb2	1416	1	4	16	rep3	35	38	10	5	8	12	13	11	14	15	6	13	8	2	7	0	0	0	0	0	0	0	0	0	0	0	0	0	0	0	0	0	0	0	0
HAV_5353	HAV_5353_S3_R1_001.fastq.gz	Y2019	M37W	Ames 27133	mixed	HN	N	sp3	spb2	1417	1	4	17	rep1	62	92	24	26	23	30	18	14	22	61	48	46	29	10	15	6	0	8	3	4	0	15	7	7	7	7	3	5	0	0	64	57	74	83	87
HAV_5354	HAV_5354_S12_R1_001.fastq.gz	Y2019	M37W	Ames 27133	mixed	HN	N	sp3	spb2	1417	1	4	17	rep2	361	332	81	73	97	96	102	49	92	16	9	16	111	44	93	0	0	0	0	0	0	0	0	0	0	0	0	0	0	0	26	26	41	32	24
HAV_5355	HAV_5355_S21_R1_001.fastq.gz	Y2019	M37W	Ames 27133	mixed	HN	N	sp3	spb2	1417	1	4	17	rep3	145	168	37	33	47	61	47	37	30	12	17	19	49	17	42	0	0	0	0	0	0	0	0	0	0	0	0	0	0	0	124	119	156	166	157
HAV_5356	HAV_5356_S30_R1_001.fastq.gz	Y2019	NC318	Ames 27155	ts	HN	N	sp3	spb2	1420	1	4	20	rep1	113	133	44	30	36	42	36	27	30	11	7	12	46	21	41	0	0	0	0	0	0	0	0	0	0	0	0	0	0	0	0	46	0	0	97
HAV_5357	HAV_5357_S39_R1_001.fastq.gz	Y2019	NC318	Ames 27155	ts	HN	N	sp3	spb2	1420	1	4	20	rep2	149	138	39	47	50	45	36	35	41	35	31	53	63	15	49	0	0	0	0	0	0	0	0	0	0	0	0	0	0	0	292	299	370	444	381
HAV_5358	HAV_5358_S47_R1_001.fastq.gz	Y2019	NC318	Ames 27155	ts	HN	N	sp3	spb2	1420	1	4	20	rep3	102	96	33	23	41	36	42	27	38	2	6	6	44	10	40	0	0	0	0	0	0	0	0	0	0	0	0	0	0	0	0	0	0	0	82
HAV_5359	HAV_5359_S55_R1_001.fastq.gz	Y2019	GA209	Ames 10248	nss	HN	N	sp3	spb2	1422	1	4	22	rep1	36	48	8	7	19	17	18	2	19	48	40	52	15	5	15	0	0	0	0	0	0	0	0	0	0	0	0	0	0	0	0	0	0	0	0
HAV_5360	HAV_5360_S63_R1_001.fastq.gz	Y2019	GA209	Ames 10248	nss	HN	N	sp3	spb2	1422	1	4	22	rep2	31	27	10	9	11	14	6	10	8	9	8	9	13	4	10	0	0	0	0	0	0	0	0	0	0	0	0	0	0	0	0	0	0	0	125
HAV_5361	HAV_5361_S4_R1_001.fastq.gz	Y2019	GA209	Ames 10248	nss	HN	N	sp3	spb2	1422	1	4	22	rep3	20	21	6	7	7	3	4	7	5	40	23	21	4	3	6	0	0	0	0	0	0	0	0	0	0	0	0	0	0	0	0	0	0	0	0
HAV_5362	HAV_5362_S13_R1_001.fastq.gz	Y2019	CML69	Ames 28184	ts	HN	N	sp3	spb2	1423	1	4	23	rep1	19	18	2	4	6	4	9	3	3	12	8	17	13	5	13	0	0	0	0	0	0	0	0	0	0	0	0	0	0	0	53	0	0	0	42
HAV_5363	HAV_5363_S22_R1_001.fastq.gz	Y2019	CML69	Ames 28184	ts	HN	N	sp3	spb2	1423	1	4	23	rep2	32	29	10	13	8	12	10	7	7	29	26	33	15	7	4	0	0	0	0	0	0	0	0	0	0	0	0	0	0	0	89	0	0	77	0
HAV_5364	HAV_5364_S8_R1_001.fastq.gz	Y2019	CML69	Ames 28184	ts	HN	N	sp3	spb2	1423	1	4	23	rep3	68	63	25	21	25	28	11	15	21	4	4	6	29	8	17	0	0	0	0	0	0	0	0	0	0	0	0	0	0	0	86	0	0	0	0
HAV_5365	HAV_5365_S9_R1_001.fastq.gz	Y2019	NC258	PI 531084	nss	HN	N	sp3	spb2	1425	1	4	25	rep1	78	82	25	30	28	26	26	21	37	38	22	33	32	15	28	0	0	0	0	0	0	0	0	0	0	0	0	0	0	0	0	0	0	85	0
HAV_5366	HAV_5366_S48_R1_001.fastq.gz	Y2019	NC258	PI 531084	nss	HN	N	sp3	spb2	1425	1	4	25	rep2	53	65	16	12	25	18	24	15	18	42	34	61	34	11	20	0	0	0	0	0	0	0	0	0	0	0	0	0	0	0	0	0	0	0	0
HAV_5367	HAV_5367_S56_R1_001.fastq.gz	Y2019	NC258	PI 531084	nss	HN	N	sp3	spb2	1425	1	4	25	rep3	22	24	8	6	10	7	10	8	6	48	61	71	11	4	7	0	0	0	0	0	0	0	0	0	0	0	0	0	0	0	0	22	78	0	18
HAV_5368	HAV_5368_S64_R1_001.fastq.gz	Y2019	F44	NSL 22893	mixed	HN	N	sp3	spb2	1427	1	4	27	rep1	21	33	9	2	5	5	8	6	10	6	6	5	8	4	9	0	0	0	0	0	0	0	0	0	0	0	0	0	0	0	20	23	0	79	22
HAV_5369	HAV_5369_S5_R1_001.fastq.gz	Y2019	F44	NSL 22893	mixed	HN	N	sp3	spb2	1427	1	4	27	rep2	37	56	15	9	18	17	11	5	19	17	5	10	21	9	21	0	0	0	0	0	0	0	0	0	0	0	0	0	0	0	39	52	66	69	71
HAV_5370	HAV_5370_S14_R1_001.fastq.gz	Y2019	F44	NSL 22893	mixed	HN	N	sp3	spb2	1427	1	4	27	rep3	67	78	8	11	19	16	17	25	14	4	8	7	31	7	15	0	0	0	0	0	0	0	7	0	0	0	0	0	0	0	75	0	0	0	0
HAV_5371	HAV_5371_S23_R1_001.fastq.gz	Y2019	SC55	Ames 27189	mixed	HN	N	sp3	spb3	1430	1	4	30	rep1	10	6	0	0	0	0	0	0	0	72	50	98	0	0	0	0	0	0	0	0	0	0	0	0	0	0	0	0	0	0	70	77	99	124	110
HAV_5372	HAV_5372_S32_R1_001.fastq.gz	Y2019	SC55	Ames 27189	mixed	HN	N	sp3	spb3	1430	1	4	30	rep2	18	18	5	9	6	10	9	4	7	73	49	78	4	4	4	0	0	0	0	0	0	0	0	0	0	0	0	0	0	0	0	0	0	65	0
HAV_5373	HAV_5373_S41_R1_001.fastq.gz	Y2019	SC55	Ames 27189	mixed	HN	N	sp3	spb3	1430	1	4	30	rep3	39	50	17	11	16	16	17	9	17	50	29	57	16	8	18	0	0	0	0	0	0	0	0	0	0	0	0	0	0	0	0	24	0	65	0
HAV_5374	HAV_5374_S49_R1_001.fastq.gz	Y2019	F2	PI 257506	mixed	HN	N	sp3	spb3	1431	1	4	31	rep1	42	38	10	11	14	17	16	10	6	30	14	28	8	6	12	0	0	0	0	0	0	0	0	0	0	0	0	0	0	0	175	149	166	243	187
HAV_5375	HAV_5375_S57_R1_001.fastq.gz	Y2019	F2	PI 257506	mixed	HN	N	sp3	spb3	1431	1	4	31	rep2	29	33	8	6	4	8	10	5	5	4	7	9	7	2	8	0	0	0	0	0	0	3	0	0	0	0	2	0	0	0	0	0	41	58	53
HAV_5376	HAV_5376_S65_R1_001.fastq.gz	Y2019	F2	PI 257506	mixed	HN	N	sp3	spb3	1431	1	4	31	rep3	46	47	14	12	24	23	16	9	11	22	12	25	18	3	13	0	0	0	0	0	0	0	0	0	0	0	0	0	0	0	38	43	34	45	33
HAV_5377	HAV_5377_S6_R1_001.fastq.gz	Y2019	IL101	Ames 27119	sweet	HN	N	sp3	spb3	1433	1	4	33	rep1	40	42	16	13	18	22	12	14	15	31	15	52	19	6	14	0	0	0	0	0	0	0	0	0	0	0	0	0	0	0	48	0	0	0	131
HAV_5378	HAV_5378_S15_R1_001.fastq.gz	Y2019	IL101	Ames 27119	sweet	HN	N	sp3	spb3	1433	1	4	33	rep2	17	13	1	4	3	5	1	9	8	14	17	20	8	4	3	0	0	0	0	0	0	0	0	0	0	0	0	0	0	0	97	86	102	143	121
HAV_5379	HAV_5379_S24_R1_001.fastq.gz	Y2019	IL101	Ames 27119	sweet	HN	N	sp3	spb3	1433	1	4	33	rep3	43	51	15	12	11	16	11	11	14	74	75	87	15	7	17	5	0	0	0	0	0	0	0	0	0	0	0	0	0	0	103	121	131	168	141
HAV_5380	HAV_5380_S10_R1_001.fastq.gz	Y2019	DE2	PI 606330	nss	HN	N	sp3	spb3	1435	1	4	35	rep1	287	220	71	70	81	81	82	47	91	0	0	0	103	31	91	0	8	5	0	0	8	11	7	14	9	0	9	11	0	1	66	65	62	115	89
HAV_5381	HAV_5381_S42_R1_001.fastq.gz	Y2019	DE2	PI 606330	nss	HN	N	sp3	spb3	1435	1	4	35	rep2	373	411	117	113	118	126	117	82	99	0	0	0	145	55	118	0	0	0	0	0	0	0	0	0	0	0	0	0	0	0	0	0	0	0	0
HAV_5382	HAV_5382_S50_R1_001.fastq.gz	Y2019	DE2	PI 606330	nss	HN	N	sp3	spb3	1435	1	4	35	rep3	52	48	15	14	20	15	20	4	20	0	0	0	24	7	18	0	0	0	0	0	0	0	0	0	0	0	0	0	0	0	0	0	0	62	48
HAV_5383	HAV_5383_S58_R1_001.fastq.gz	Y2019	TX601	Ames 22763	ts	HN	N	sp3	spb3	1437	1	4	37	rep1	33	29	5	11	13	9	7	4	10	60	40	75	7	5	14	0	0	0	0	0	0	0	0	0	0	0	0	0	0	0	0	20	0	49	0
HAV_5384	HAV_5384_S66_R1_001.fastq.gz	Y2019	TX601	Ames 22763	ts	HN	N	sp3	spb3	1437	1	4	37	rep2	61	40	9	16	10	17	10	16	16	74	56	89	25	5	16	0	0	0	0	0	0	0	0	0	0	0	0	0	0	0	0	0	23	39	0
HAV_5385	HAV_5385_S7_R1_001.fastq.gz	Y2019	TX601	Ames 22763	ts	HN	N	sp3	spb3	1437	1	4	37	rep3	77	94	24	32	36	26	27	31	32	39	20	30	26	18	32	3	0	6	0	0	0	0	5	7	0	0	9	0	0	3	0	0	0	0	0
HAV_5386	HAV_5386_S16_R1_001.fastq.gz	Y2019	Check_B73xMo17			HN	N	sp3	spb3	1440	1	4	40	rep1	51	53	12	9	28	20	9	9	14	18	14	26	10	5	16	0	0	0	0	0	0	0	0	1	0	0	0	0	0	0	0	0	0	21	0
HAV_5387	HAV_5387_S25_R1_001.fastq.gz	Y2019	Check_B73xMo17			HN	N	sp3	spb3	1440	1	4	40	rep2	111	132	36	26	43	35	38	24	33	33	32	40	41	14	37	7	12	6	10	10	7	10	12	22	7	10	13	19	3	15	0	0	0	0	0
HAV_5388	HAV_5388_S11_R1_001.fastq.gz	Y2019	Check_B73xMo17			HN	N	sp3	spb3	1440	1	4	40	rep3	105	97	26	26	37	23	26	20	23	5	4	12	42	12	22	0	0	0	0	0	0	5	6	8	0	0	0	0	0	2	0	0	0	0	109
HAV_5389	HAV_5389_S43_R1_001.fastq.gz	Y2019	T232	PI 550522	mixed	HN	N	sp3	spb3	1441	1	4	41	rep1	13	17	3	8	6	6	6	2	5	23	11	15	2	1	7	0	0	0	0	0	0	0	0	0	0	0	0	0	0	0	0	0	0	0	0
HAV_5390	HAV_5390_S51_R1_001.fastq.gz	Y2019	T232	PI 550522	mixed	HN	N	sp3	spb3	1441	1	4	41	rep2	8	4	3	1	6	3	1	0	2	8	0	10	1	0	0	0	0	0	0	0	0	0	0	0	0	0	0	0	0	0	0	0	0	0	0
HAV_5391	HAV_5391_S59_R1_001.fastq.gz	Y2019	T232	PI 550522	mixed	HN	N	sp3	spb3	1441	1	4	41	rep3	53	75	22	11	16	19	21	15	18	21	6	19	14	6	11	0	0	0	0	0	0	0	0	0	0	0	0	0	0	0	0	0	0	59	0
HAV_5392	HAV_5392_S67_R1_001.fastq.gz	Y2019	B97	PI 564682	nss	HN	N	sp4	spb1	1443	1	4	43	rep1	34	29	12	10	12	12	8	6	12	54	44	67	17	8	15	0	0	0	0	0	0	0	0	0	0	0	0	0	0	0	0	0	0	0	0
HAV_5393	HAV_5393_S8_R1_001.fastq.gz	Y2019	B97	PI 564682	nss	HN	N	sp4	spb1	1443	1	4	43	rep2	104	86	25	22	39	28	24	15	25	36	33	37	56	4	31	0	0	0	0	0	0	0	0	0	0	0	0	0	0	0	41	50	46	56	55
HAV_5394	HAV_5394_S17_R1_001.fastq.gz	Y2019	B97	PI 564682	nss	HN	N	sp4	spb1	1443	1	4	43	rep3	22	37	8	10	6	10	10	6	17	8	6	14	8	2	12	0	0	0	0	0	0	0	0	0	0	0	0	0	0	0	39	43	29	60	35
HAV_5395	HAV_5395_S26_R1_001.fastq.gz	Y2019	B2	Ames 26769	nss	HN	N	sp4	spb1	1445	1	4	45	rep1	19	29	6	5	6	4	10	7	11	5	4	4	9	6	6	0	0	0	0	0	0	0	0	0	0	0	0	0	0	0	69	71	99	111	97
HAV_5396	HAV_5396_S35_R1_001.fastq.gz	Y2019	B2	Ames 26769	nss	HN	N	sp4	spb1	1445	1	4	45	rep2	0	36	0	0	0	0	0	0	0	0	0	0	0	0	0	0	0	0	0	0	0	0	0	0	0	0	0	0	0	0	85	74	87	97	108
HAV_5397	HAV_5397_S44_R1_001.fastq.gz	Y2019	B2	Ames 26769	nss	HN	N	sp4	spb1	1445	1	4	45	rep3	19	19	3	5	4	4	4	5	6	62	35	61	8	1	3	0	0	2	0	0	0	2	0	0	0	0	0	0	0	0	13	27	28	31	24
HAV_5398	HAV_5398_S52_R1_001.fastq.gz	Y2019	B77	PI 608765	nss	HN	N	sp4	spb1	1447	1	4	47	rep1	106	106	24	37	34	39	19	17	24	32	27	41	50	16	26	0	0	0	0	0	0	0	0	0	0	0	0	0	0	0	0	0	0	0	0
HAV_5399	HAV_5399_S60_R1_001.fastq.gz	Y2019	B77	PI 608765	nss	HN	N	sp4	spb1	1447	1	4	47	rep2	21	28	6	7	5	5	9	5	10	22	23	29	5	1	8	0	0	0	0	0	0	0	0	0	0	0	0	0	0	0	25	39	43	44	41
HAV_5400	HAV_5400_S68_R1_001.fastq.gz	Y2019	B77	PI 608765	nss	HN	N	sp4	spb1	1447	1	4	47	rep3	95	94	23	24	30	41	30	15	25	23	12	15	30	23	30	0	0	0	0	0	0	0	0	0	0	0	0	0	0	0	0	0	0	0	0
HAV_5401	HAV_5401_S69_R1_001.fastq.gz	Y2019	CI3A	Ames 26116	nss	HN	N	sp4	spb1	1450	1	4	50	rep1	19	22	6	3	13	7	12	9	6	12	3	13	8	3	11	0	0	0	0	0	0	0	0	0	0	0	0	0	0	0	24	29	23	36	20
HAV_5402	HAV_5402_S77_R1_001.fastq.gz	Y2019	CI3A	Ames 26116	nss	HN	N	sp4	spb1	1450	1	4	50	rep2	45	46	14	13	8	15	14	9	12	35	34	42	14	7	9	0	0	0	0	0	0	5	0	6	0	0	6	0	0	0	0	0	0	72	0
HAV_5403	HAV_5403_S85_R1_001.fastq.gz	Y2019	CI3A	Ames 26116	nss	HN	N	sp4	spb1	1450	1	4	50	rep3	113	126	33	23	39	34	39	28	39	6	7	7	33	15	26	0	0	0	0	0	0	0	0	0	0	0	0	0	0	0	0	0	0	0	0
HAV_5404	HAV_5404_S93_R1_001.fastq.gz	Y2019	B37	PI 550467	ss	HN	N	sp4	spb1	1451	1	4	51	rep1	51	56	16	13	10	18	13	19	16	14	2	9	28	5	20	0	0	0	0	0	0	0	0	0	0	0	0	0	0	0	0	0	0	0	0
HAV_5405	HAV_5405_S101_R1_001.fastq.gz	Y2019	B37	PI 550467	ss	HN	N	sp4	spb1	1451	1	4	51	rep2	159	172	38	33	57	59	49	31	46	0	0	0	64	22	47	0	0	0	0	0	0	0	0	0	0	0	0	0	0	0	0	0	0	0	0
HAV_5406	HAV_5406_S109_R1_001.fastq.gz	Y2019	B37	PI 550467	ss	HN	N	sp4	spb1	1451	1	4	51	rep3	69	67	14	14	19	16	15	15	23	10	7	17	20	9	10	0	0	0	0	0	0	0	0	0	0	0	0	0	0	0	0	0	0	0	48
HAV_5407	HAV_5407_S117_R1_001.fastq.gz	Y2019	CI64	Ames 19314	nss	HN	N	sp4	spb1	1453	1	4	53	rep1	46	64	9	13	15	21	12	11	14	56	39	72	13	6	17	0	0	0	0	0	0	0	0	0	0	0	0	0	0	0	43	42	48	50	64
HAV_5408	HAV_5408_S125_R1_001.fastq.gz	Y2019	CI64	Ames 19314	nss	HN	N	sp4	spb1	1453	1	4	53	rep2	32	36	11	5	9	8	12	8	3	17	19	16	10	1	12	0	0	0	0	0	0	11	3	11	4	6	0	0	0	5	30	29	34	46	30
HAV_5409	HAV_5409_S70_R1_001.fastq.gz	Y2019	CI64	Ames 19314	nss	HN	N	sp4	spb1	1453	1	4	53	rep3	142	126	35	23	32	33	32	30	36	19	13	28	38	11	36	0	0	0	0	0	0	0	0	0	0	0	0	0	0	0	25	32	35	38	44
HAV_5410	HAV_5410_S78_R1_001.fastq.gz	Y2019	B109	PI 597927	ss	HN	N	sp4	spb1	1455	1	4	55	rep1	69	83	21	19	21	34	18	15	16	21	13	20	27	8	19	0	0	0	0	0	0	0	0	0	0	0	0	6	0	0	34	40	33	38	52
HAV_5411	HAV_5411_S86_R1_001.fastq.gz	Y2019	B109	PI 597927	ss	HN	N	sp4	spb1	1455	1	4	55	rep2	107	122	36	26	30	37	34	24	29	25	5	22	50	19	29	9	2	6	0	0	0	9	8	11	6	11	5	8	0	2	70	86	95	128	102
HAV_5412	HAV_5412_S94_R1_001.fastq.gz	Y2019	B109	PI 597927	ss	HN	N	sp4	spb1	1455	1	4	55	rep3	19	20	7	8	10	7	6	0	5	5	0	7	6	0	4	0	0	0	0	0	0	0	0	0	0	0	0	0	0	0	82	0	0	39	0
HAV_5413	HAV_5413_S102_R1_001.fastq.gz	Y2019	NC342	Ames 27167	nss	HN	N	sp4	spb2	1457	1	4	57	rep1	26	24	9	9	2	7	11	7	7	2	2	3	12	1	5	0	0	0	0	0	0	0	0	0	0	0	0	0	0	0	37	36	50	93	49
HAV_5414	HAV_5414_S110_R1_001.fastq.gz	Y2019	NC342	Ames 27167	nss	HN	N	sp4	spb2	1457	1	4	57	rep2	31	29	9	7	7	8	13	12	10	40	34	52	15	1	6	0	0	0	0	0	0	0	0	0	0	0	0	0	0	0	97	96	108	158	136
HAV_5415	HAV_5415_S118_R1_001.fastq.gz	Y2019	NC342	Ames 27167	nss	HN	N	sp4	spb2	1457	1	4	57	rep3	15	17	4	8	6	10	4	6	8	35	19	28	11	1	5	10	8	5	10	5	6	11	16	15	11	7	13	7	0	13	138	128	187	205	173
HAV_5416	HAV_5416_S126_R1_001.fastq.gz	Y2019	L317	NSL 65873	nss	HN	N	sp4	spb2	1459	1	4	59	rep1	85	88	11	16	20	31	25	16	26	16	10	25	30	13	17	0	0	0	0	0	0	5	4	10	0	2	3	0	0	0	0	0	0	0	0
HAV_5417	HAV_5417_S79_R1_001.fastq.gz	Y2019	L317	NSL 65873	nss	HN	N	sp4	spb2	1459	1	4	59	rep2	77	76	8	13	13	26	17	18	10	25	23	41	29	6	19	0	0	0	0	0	0	3	0	0	0	0	0	0	0	0	0	0	0	0	0
HAV_5418	HAV_5418_S87_R1_001.fastq.gz	Y2019	L317	NSL 65873	nss	HN	N	sp4	spb2	1459	1	4	59	rep3	15	19	7	4	7	2	9	6	10	64	40	67	13	4	11	0	0	0	0	0	0	0	0	0	0	0	0	0	0	0	0	0	0	0	0
HAV_5419	HAV_5419_S95_R1_001.fastq.gz	Y2019	MO44	Ames 28939	nss	HN	N	sp4	spb2	1461	1	4	61	rep1	44	34	8	11	15	15	10	7	13	20	17	20	9	6	20	0	0	0	0	0	0	0	0	0	0	0	0	0	0	0	18	16	0	24	58
HAV_5420	HAV_5420_S71_R1_001.fastq.gz	Y2019	MO44	Ames 28939	nss	HN	N	sp4	spb2	1461	1	4	61	rep2	44	51	17	4	10	16	22	14	9	37	30	31	9	6	16	0	0	0	0	0	0	1	0	5	0	0	0	0	0	0	0	0	0	82	0
HAV_5421	HAV_5421_S103_R1_001.fastq.gz	Y2019	MO44	Ames 28939	nss	HN	N	sp4	spb2	1461	1	4	61	rep3	21	20	6	3	2	9	1	1	4	2	1	2	5	3	5	0	0	0	0	0	0	0	0	0	0	0	0	0	0	0	0	0	0	0	0
HAV_5422	HAV_5422_S111_R1_001.fastq.gz	Y2019	MO45	PI 583350	mixed	HN	N	sp4	spb2	1463	1	4	63	rep1	224	233	71	49	58	74	74	50	69	28	21	39	74	45	87	9	11	14	12	4	7	14	8	16	12	14	2	17	8	8	0	21	0	26	16
HAV_5423	HAV_5423_S119_R1_001.fastq.gz	Y2019	MO45	PI 583350	mixed	HN	N	sp4	spb2	1463	1	4	63	rep2	44	59	11	14	17	18	19	14	21	125	60	128	26	5	19	0	0	0	0	0	0	0	0	0	0	0	0	0	0	0	52	0	0	0	44
HAV_5424	HAV_5424_S127_R1_001.fastq.gz	Y2019	MO45	PI 583350	mixed	HN	N	sp4	spb2	1463	1	4	63	rep3	270	277	53	57	74	77	79	54	84	74	49	85	84	30	61	0	0	0	0	0	0	11	0	3	0	0	0	0	0	0	0	0	0	0	0
HAV_5425	HAV_5425_S72_R1_001.fastq.gz	Y2019	NC368	Ames 27180	ss	HN	N	sp4	spb2	1466	1	4	66	rep1	82	69	21	24	16	33	35	19	26	5	2	8	28	17	29	9	5	13	11	9	8	8	11	19	11	11	16	11	9	5	0	0	0	0	120
HAV_5426	HAV_5426_S80_R1_001.fastq.gz	Y2019	NC368	Ames 27180	ss	HN	N	sp4	spb2	1466	1	4	66	rep2	83	66	23	15	27	22	33	16	29	0	0	0	30	8	29	0	0	0	0	0	0	6	0	8	0	0	0	0	0	0	0	16	30	0	73
HAV_5427	HAV_5427_S88_R1_001.fastq.gz	Y2019	NC368	Ames 27180	ss	HN	N	sp4	spb2	1466	1	4	66	rep3	91	74	28	13	19	33	19	9	34	4	4	5	33	9	16	0	0	0	0	0	0	0	0	0	0	0	0	0	0	0	26	34	30	57	45
HAV_5428	HAV_5428_S12_R1_001.fastq.gz	Y2019	OH40B	NSL 28966	nss	HN	N	sp4	spb2	1468	1	4	68	rep1	82	53	17	20	27	23	24	12	17	126	98	161	35	3	32	4	0	5	0	0	0	10	10	15	0	0	4	0	0	0	0	0	0	85	0
HAV_5429	HAV_5429_S104_R1_001.fastq.gz	Y2019	OH40B	NSL 28966	nss	HN	N	sp4	spb2	1468	1	4	68	rep2	44	67	18	12	13	22	18	9	11	59	29	44	29	9	23	0	0	0	0	0	0	0	0	0	0	0	0	0	0	0	68	0	0	0	105
HAV_5430	HAV_5430_S112_R1_001.fastq.gz	Y2019	OH40B	NSL 28966	nss	HN	N	sp4	spb2	1468	1	4	68	rep3	108	113	40	26	34	44	23	12	29	36	22	47	33	16	32	0	0	0	0	0	0	0	0	0	0	0	0	0	0	0	44	47	49	66	66
HAV_5431	HAV_5431_S120_R1_001.fastq.gz	Y2019	NC310	Ames 27151	ss	HN	N	sp4	spb2	1470	1	4	70	rep1	92	81	29	32	35	36	28	18	29	54	37	57	39	22	22	0	0	0	0	0	0	0	0	0	0	0	0	0	0	0	0	0	0	0	0
HAV_5432	HAV_5432_S128_R1_001.fastq.gz	Y2019	NC310	Ames 27151	ss	HN	N	sp4	spb2	1470	1	4	70	rep2	103	97	21	20	28	23	22	16	29	31	26	35	29	12	24	0	0	0	0	0	0	0	0	0	0	0	0	0	0	0	0	0	0	0	0
HAV_5433	HAV_5433_S73_R1_001.fastq.gz	Y2019	NC310	Ames 27151	ss	HN	N	sp4	spb2	1470	1	4	70	rep3	75	105	16	26	30	31	20	20	18	77	43	67	24	14	26	16	9	10	12	4	10	17	21	15	12	7	9	9	6	4	67	0	0	0	42
HAV_5434	HAV_5434_S81_R1_001.fastq.gz	Y2019	WF9	Ames 19293	nss	HN	N	sp4	spb3	1472	1	4	72	rep1	189	181	42	45	64	68	48	42	59	25	24	25	57	24	59	6	5	6	0	8	5	13	10	7	3	4	14	9	0	6	10	52	20	0	22
HAV_5435	HAV_5435_S89_R1_001.fastq.gz	Y2019	WF9	Ames 19293	nss	HN	N	sp4	spb3	1472	1	4	72	rep2	194	207	48	46	63	68	49	39	62	9	8	4	66	20	66	0	0	0	0	0	0	0	0	0	0	0	0	0	0	0	0	0	0	0	48
HAV_5436	HAV_5436_S13_R1_001.fastq.gz	Y2019	WF9	Ames 19293	nss	HN	N	sp4	spb3	1472	1	4	72	rep3	364	407	85	85	120	138	115	95	109	0	0	0	132	63	115	0	0	0	0	0	0	0	0	0	0	0	0	0	0	0	0	19	44	29	32
HAV_5437	HAV_5437_S105_R1_001.fastq.gz	Y2019	SG1533	PI 587132	popcorn	HN	N	sp4	spb3	1474	1	4	74	rep1	133	138	36	37	43	33	28	20	40	9	6	12	38	14	45	9	14	11	9	4	8	9	9	18	13	17	7	8	0	13	0	0	0	0	0
HAV_5438	HAV_5438_S113_R1_001.fastq.gz	Y2019	SG1533	PI 587132	popcorn	HN	N	sp4	spb3	1474	1	4	74	rep2	98	89	25	20	35	32	31	15	32	42	26	37	30	17	19	8	7	8	8	0	5	18	16	13	6	9	6	9	9	10	230	220	262	324	291
HAV_5439	HAV_5439_S121_R1_001.fastq.gz	Y2019	SG1533	PI 587132	popcorn	HN	N	sp4	spb3	1474	1	4	74	rep3	474	489	107	115	130	122	133	115	147	45	26	33	153	56	158	42	36	40	38	28	24	44	51	67	42	54	41	47	14	41	0	26	68	24	27
HAV_5440	HAV_5440_S129_R1_001.fastq.gz	Y2019	33-16	Ames 26771	nss	HN	N	sp4	spb3	1475	1	4	75	rep1	122	129	38	28	36	47	42	34	44	35	22	20	58	25	51	25	20	18	17	14	14	28	22	27	32	18	13	24	9	14	57	0	0	0	0
HAV_5441	HAV_5441_S74_R1_001.fastq.gz	Y2019	33-16	Ames 26771	nss	HN	N	sp4	spb3	1475	1	4	75	rep2	74	53	17	24	25	22	18	13	19	27	17	28	18	14	18	0	0	0	0	0	0	0	0	0	0	0	0	0	0	0	0	0	0	0	0
HAV_5442	HAV_5442_S82_R1_001.fastq.gz	Y2019	33-16	Ames 26771	nss	HN	N	sp4	spb3	1475	1	4	75	rep3	164	198	62	41	54	40	56	31	67	30	26	39	62	28	64	0	0	8	0	0	0	7	3	8	0	0	7	9	0	7	24	30	32	35	33
HAV_5443	HAV_5443_S90_R1_001.fastq.gz	Y2019	R229	PI 592734	ss	HN	N	sp4	spb3	1478	1	4	78	rep1	101	99	17	18	24	33	34	15	26	5	1	8	34	7	23	18	7	6	7	12	5	17	18	18	13	10	8	7	6	9	0	0	0	0	0
HAV_5444	HAV_5444_S98_R1_001.fastq.gz	Y2019	R229	PI 592734	ss	HN	N	sp4	spb3	1478	1	4	78	rep2	33	41	12	12	17	18	14	10	20	6	1	1	16	3	13	0	0	0	0	0	0	8	3	10	5	0	2	2	0	0	0	126	0	0	0
HAV_5445	HAV_5445_S106_R1_001.fastq.gz	Y2019	R229	PI 592734	ss	HN	N	sp4	spb3	1478	1	4	78	rep3	40	31	12	13	13	9	10	5	9	4	1	2	23	4	16	0	0	0	4	0	0	8	0	10	0	0	0	0	0	4	0	0	0	0	0
HAV_5446	HAV_5446_S114_R1_001.fastq.gz	Y2019	796	Ames 27196	mixed	HN	N	sp4	spb3	1480	1	4	80	rep1	225	233	73	80	84	96	91	44	98	0	0	0	91	46	97	19	12	13	15	8	14	18	10	16	14	17	15	11	6	16	0	0	0	0	0
HAV_5447	HAV_5447_S122_R1_001.fastq.gz	Y2019	796	Ames 27196	mixed	HN	N	sp4	spb3	1480	1	4	80	rep2	341	343	112	110	95	115	107	77	104	0	0	0	122	52	115	10	16	12	11	11	4	28	13	19	15	19	16	17	10	13	20	22	29	39	45
HAV_5448	HAV_5448_S130_R1_001.fastq.gz	Y2019	796	Ames 27196	mixed	HN	N	sp4	spb3	1480	1	4	80	rep3	253	254	72	76	70	79	81	54	81	0	0	0	89	38	80	6	0	0	3	0	4	6	5	8	12	3	0	4	0	0	21	49	38	52	37
HAV_5449	HAV_5449_S75_R1_001.fastq.gz	Y2019	VA85	Ames 27193	nss	HN	N	sp4	spb3	1482	1	4	82	rep1	65	72	16	16	18	22	17	14	14	2	2	8	20	13	13	0	0	0	0	0	0	0	0	0	0	0	0	0	0	0	17	22	0	26	20
HAV_5450	HAV_5450_S83_R1_001.fastq.gz	Y2019	VA85	Ames 27193	nss	HN	N	sp4	spb3	1482	1	4	82	rep2	58	57	12	12	19	20	15	11	16	110	64	120	19	4	13	2	7	9	7	7	10	13	13	16	11	5	5	8	0	5	0	0	0	73	0
HAV_5451	HAV_5451_S91_R1_001.fastq.gz	Y2019	VA85	Ames 27193	nss	HN	N	sp4	spb3	1482	1	4	82	rep3	75	73	17	17	24	28	25	17	21	27	14	30	34	12	36	10	0	5	3	4	3	13	7	8	12	0	8	7	0	8	0	0	0	0	0
HAV_5452	HAV_5452_S14_R1_001.fastq.gz	Y2019	Check_B73xMo17			HN	N	sp4	spb3	1483	1	4	83	rep1	113	87	51	37	40	33	28	27	36	23	17	23	38	25	41	25	13	8	11	9	9	23	17	18	14	14	19	13	10	21	0	0	0	0	0
HAV_5453	HAV_5453_S15_R1_001.fastq.gz	Y2019	Check_B73xMo17			HN	N	sp4	spb3	1483	1	4	83	rep2	163	154	37	35	40	42	49	27	43	26	10	21	59	20	45	0	0	0	0	0	0	0	0	0	0	0	0	0	0	0	0	0	0	0	0
HAV_5454	HAV_5454_S115_R1_001.fastq.gz	Y2019	Check_B73xMo17			HN	N	sp4	spb3	1483	1	4	83	rep3	73	87	23	28	25	27	24	15	27	52	34	64	34	16	14	12	7	14	16	7	13	13	9	21	10	1	7	17	0	7	0	0	0	0	0
HAV_5455	HAV_5455_S123_R1_001.fastq.gz	Y2019	CML277	PI 595550	ts	HN	N	sp3	spb1	1501	1	5	01	rep1	186	221	46	37	64	57	50	47	51	24	8	19	85	31	56	3	0	0	0	0	0	0	0	0	0	0	0	0	0	0	36	38	49	54	39
HAV_5456	HAV_5456_S131_R1_001.fastq.gz	Y2019	CML277	PI 595550	ts	HN	N	sp3	spb1	1501	1	5	01	rep2	116	124	24	26	42	41	40	20	32	13	9	13	46	10	29	10	3	13	0	7	4	17	14	13	11	5	11	16	0	6	89	0	0	0	0
HAV_5457	HAV_5457_S76_R1_001.fastq.gz	Y2019	CML277	PI 595550	ts	HN	N	sp3	spb1	1501	1	5	01	rep3	147	148	70	44	51	70	45	43	54	25	14	30	49	35	51	0	0	0	0	0	0	0	0	0	0	0	0	0	0	0	31	25	27	25	32
HAV_5458	HAV_5458_S84_R1_001.fastq.gz	Y2019	A214N	PI 406112	mixed	HN	N	sp3	spb1	1504	1	5	04	rep1	133	145	26	28	58	54	42	43	29	12	5	10	45	20	53	0	0	0	0	0	0	0	0	0	0	0	0	0	0	0	25	35	58	71	44
HAV_5459	HAV_5459_S92_R1_001.fastq.gz	Y2019	A214N	PI 406112	mixed	HN	N	sp3	spb1	1504	1	5	04	rep2	219	240	52	55	98	71	54	68	79	29	21	33	78	37	70	9	0	6	9	0	0	0	12	14	8	8	6	0	0	6	0	0	0	75	0
HAV_5460	HAV_5460_S16_R1_001.fastq.gz	Y2019	A214N	PI 406112	mixed	HN	N	sp3	spb1	1504	1	5	04	rep3	266	254	54	63	86	79	74	54	73	19	12	22	92	43	75	0	0	0	0	0	0	0	0	0	0	0	0	0	0	0	0	0	0	127	0
HAV_5461	HAV_5461_S108_R1_001.fastq.gz	Y2019	B68	PI 550465	ss	HN	N	sp3	spb1	1506	1	5	06	rep1	99	89	21	21	19	27	24	27	43	9	11	8	35	15	26	0	0	0	0	0	0	0	0	0	0	0	0	0	0	0	34	0	27	43	24
HAV_5462	HAV_5462_S116_R1_001.fastq.gz	Y2019	B68	PI 550465	ss	HN	N	sp3	spb1	1506	1	5	06	rep2	139	139	31	29	63	64	38	30	51	5	8	15	47	23	56	0	0	0	0	0	0	0	4	0	0	0	0	0	0	0	45	50	66	76	70
HAV_5463	HAV_5463_S124_R1_001.fastq.gz	Y2019	B68	PI 550465	ss	HN	N	sp3	spb1	1506	1	5	06	rep3	97	92	17	25	25	30	28	30	27	11	6	17	35	15	29	0	0	0	0	0	0	0	0	0	0	0	0	0	0	0	27	27	35	38	38
HAV_5464	HAV_5464_S132_R1_001.fastq.gz	Y2019	CML322	Ames 27096	ts	HN	N	sp3	spb1	1508	1	5	08	rep1	178	218	49	47	46	71	57	44	40	22	7	9	61	28	60	9	15	13	11	13	10	26	14	17	14	8	14	9	0	11	0	0	0	0	0
HAV_5465	HAV_5465_S1_R1_001.fastq.gz	Y2019	CML322	Ames 27096	ts	HN	N	sp3	spb1	1508	1	5	08	rep2	93	40	51	40	58	62	56	51	53	27	27	22	47	34	83	10	0	13	13	0	0	10	17	0	0	16	0	0	0	16	0	0	0	0	0
HAV_5466	HAV_5466_S10_R1_001.fastq.gz	Y2019	CML322	Ames 27096	ts	HN	N	sp3	spb1	1508	1	5	08	rep3	189	88	153	115	128	152	114	109	135	66	65	71	112	86	150	0	0	0	0	0	0	0	0	0	0	0	0	0	0	0	52	0	16	0	0
HAV_5467	HAV_5467_S19_R1_001.fastq.gz	Y2019	CML333	Ames 27101	ts	HN	N	sp3	spb1	1509	1	5	09	rep1	65	54	44	34	48	43	47	35	59	79	69	57	29	38	54	0	0	0	0	0	0	0	0	0	0	0	0	0	0	0	0	0	0	0	0
HAV_5468	HAV_5468_S28_R1_001.fastq.gz	Y2019	CML333	Ames 27101	ts	HN	N	sp3	spb1	1509	1	5	09	rep2	40	20	35	21	26	24	17	18	36	18	36	17	20	15	32	0	0	0	0	0	0	0	0	0	0	0	0	0	0	0	0	0	0	0	0
HAV_5469	HAV_5469_S37_R1_001.fastq.gz	Y2019	CML333	Ames 27101	ts	HN	N	sp3	spb1	1509	1	5	09	rep3	58	41	48	41	44	49	47	43	59	35	14	26	43	48	55	0	0	0	0	0	0	0	0	0	0	0	0	0	0	0	0	0	0	0	0
HAV_5470	HAV_5470_S45_R1_001.fastq.gz	Y2019	CML10	Ames 27072	ts	HN	N	sp3	spb1	1512	1	5	12	rep1	117	57	81	68	83	70	59	80	76	34	38	29	61	48	84	0	0	0	0	0	0	0	0	0	0	0	0	0	0	0	137	93	96	51	75
HAV_5471	HAV_5471_S53_R1_001.fastq.gz	Y2019	CML10	Ames 27072	ts	HN	N	sp3	spb1	1512	1	5	12	rep2	143	70	105	49	89	97	71	62	90	67	57	48	60	81	89	0	0	0	0	0	0	0	0	0	0	0	0	0	0	0	0	0	0	0	0
HAV_5472	HAV_5472_S61_R1_001.fastq.gz	Y2019	CML10	Ames 27072	ts	HN	N	sp3	spb1	1512	1	5	12	rep3	80	46	65	53	63	50	43	52	65	53	34	44	45	47	80	0	11	21	0	10	0	0	0	0	13	13	0	12	9	14	0	0	0	0	0
HAV_5473	HAV_5473_S17_R1_001.fastq.gz	Y2019	CML52	PI 595561	ts	HN	N	sp3	spb1	1514	1	5	14	rep1	329	176	165	139	182	176	130	155	191	33	41	32	115	154	210	0	0	0	0	0	0	0	0	0	0	0	0	0	0	0	70	46	56	33	30
HAV_5474	HAV_5474_S11_R1_001.fastq.gz	Y2019	CML52	PI 595561	ts	HN	N	sp3	spb1	1514	1	5	14	rep2	155	98	97	86	130	116	99	82	111	23	28	23	80	76	124	0	0	0	0	0	0	0	0	0	0	0	0	0	0	0	0	0	24	0	0
HAV_5475	HAV_5475_S20_R1_001.fastq.gz	Y2019	CML52	PI 595561	ts	HN	N	sp3	spb1	1514	1	5	14	rep3	186	102	132	122	142	136	116	111	160	41	21	32	117	92	151	0	0	0	0	0	0	0	0	0	0	0	0	0	0	0	0	0	0	0	0
HAV_5476	HAV_5476_S18_R1_001.fastq.gz	Y2019	MO24W	PI 587144	mixed	HN	N	sp3	spb2	1516	1	5	16	rep1	26	29	41	28	34	33	27	35	32	78	69	60	17	24	40	0	0	0	0	0	0	0	0	0	0	0	0	0	0	0	173	104	141	81	113
HAV_5477	HAV_5477_S38_R1_001.fastq.gz	Y2019	MO24W	PI 587144	mixed	HN	N	sp3	spb2	1516	1	5	16	rep2	37	19	21	15	25	19	14	11	26	90	57	73	27	16	15	0	0	0	0	0	0	0	0	0	0	0	0	0	0	0	88	54	65	35	56
HAV_5478	HAV_5478_S46_R1_001.fastq.gz	Y2019	MO24W	PI 587144	mixed	HN	N	sp3	spb2	1516	1	5	16	rep3	18	6	16	6	9	18	14	16	10	151	127	110	13	7	19	18	0	11	0	17	19	18	19	0	18	13	9	11	17	20	0	0	39	0	0
HAV_5479	HAV_5479_S54_R1_001.fastq.gz	Y2019	Check_B73xMo17			HN	N	sp3	spb2	1517	1	5	17	rep1	62	38	30	23	35	46	36	38	47	80	60	54	39	28	54	0	0	0	0	0	0	0	0	0	0	0	0	0	0	0	0	0	0	0	0
HAV_5480	HAV_5480_S62_R1_001.fastq.gz	Y2019	Check_B73xMo17			HN	N	sp3	spb2	1517	1	5	17	rep2	56	30	32	20	33	39	29	29	49	93	71	86	32	27	38	0	0	0	0	0	0	0	0	0	0	0	0	0	0	0	0	0	0	0	0
HAV_5481	HAV_5481_S3_R1_001.fastq.gz	Y2019	Check_B73xMo17			HN	N	sp3	spb2	1517	1	5	17	rep3	110	48	68	52	72	68	53	54	76	116	95	87	52	64	85	0	0	0	0	0	0	0	0	0	0	0	0	0	0	0	0	0	0	0	0
HAV_5482	HAV_5482_S12_R1_001.fastq.gz	Y2019	NC222	Ames 12729	nss	HN	N	sp3	spb2	1519	1	5	19	rep1	63	40	31	40	49	40	40	25	56	78	67	70	39	42	58	16	11	21	17	16	24	15	14	0	33	22	18	27	14	21	65	46	49	22	29
HAV_5483	HAV_5483_S21_R1_001.fastq.gz	Y2019	NC222	Ames 12729	nss	HN	N	sp3	spb2	1519	1	5	19	rep2	120	58	64	65	68	76	73	76	90	142	106	80	45	48	73	10	0	0	13	0	12	0	0	0	12	18	14	16	12	12	120	67	71	42	57
HAV_5484	HAV_5484_S30_R1_001.fastq.gz	Y2019	NC222	Ames 12729	nss	HN	N	sp3	spb2	1519	1	5	19	rep3	130	66	74	61	80	65	55	85	89	40	32	31	74	58	93	0	0	0	0	0	0	0	0	0	0	8	0	10	0	0	52	35	40	16	25
HAV_5485	HAV_5485_S39_R1_001.fastq.gz	Y2019	NC296	Ames 27144	ts	HN	N	sp3	spb2	1521	1	5	21	rep1	52	40	27	21	27	37	31	32	28	28	8	20	28	22	37	17	13	23	20	40	15	10	17	12	21	27	15	24	18	31	0	0	0	0	0
HAV_5486	HAV_5486_S47_R1_001.fastq.gz	Y2019	NC296	Ames 27144	ts	HN	N	sp3	spb2	1521	1	5	21	rep2	80	29	44	32	40	46	37	48	56	15	9	10	33	38	61	0	0	0	0	0	0	0	0	0	0	0	0	0	0	0	0	0	0	0	0
HAV_5487	HAV_5487_S55_R1_001.fastq.gz	Y2019	NC296	Ames 27144	ts	HN	N	sp3	spb2	1521	1	5	21	rep3	149	80	92	88	107	119	89	78	97	19	17	16	84	82	126	0	0	0	0	0	0	0	0	0	0	0	0	0	0	0	0	0	0	0	0
HAV_5488	HAV_5488_S63_R1_001.fastq.gz	Y2019	K4	NSL 30038	nss	HN	N	sp3	spb2	1524	1	5	24	rep1	35	26	25	21	25	32	22	16	35	124	75	79	21	23	24	0	0	0	0	0	0	0	0	0	0	0	0	0	0	0	166	94	122	59	95
HAV_5489	HAV_5489_S4_R1_001.fastq.gz	Y2019	K4	NSL 30038	nss	HN	N	sp3	spb2	1524	1	5	24	rep2	127	63	101	76	126	119	82	74	86	169	108	102	86	77	102	0	0	0	0	0	0	0	0	0	0	0	0	0	0	0	627	328	412	175	294
HAV_5490	HAV_5490_S13_R1_001.fastq.gz	Y2019	K4	NSL 30038	nss	HN	N	sp3	spb2	1524	1	5	24	rep3	83	47	66	45	61	63	59	62	72	99	59	85	45	55	66	59	40	62	58	69	57	40	60	32	92	80	60	68	64	84	67	30	37	16	31
HAV_5491	HAV_5491_S22_R1_001.fastq.gz	Y2019	Check_B73xMo17			HN	N	sp3	spb2	1525	1	5	25	rep1	43	24	29	24	38	29	30	25	45	70	58	59	23	23	31	0	6	9	11	0	0	9	7	0	0	13	0	0	11	20	0	0	0	0	0
HAV_5492	HAV_5492_S31_R1_001.fastq.gz	Y2019	Check_B73xMo17			HN	N	sp3	spb2	1525	1	5	25	rep2	132	70	104	73	107	75	83	81	82	45	45	38	76	70	100	0	0	0	0	0	0	0	0	0	0	0	0	0	0	0	0	0	0	0	0
HAV_5493	HAV_5493_S40_R1_001.fastq.gz	Y2019	Check_B73xMo17			HN	N	sp3	spb2	1525	1	5	25	rep3	100	54	77	52	65	68	61	47	58	17	14	16	64	35	68	0	0	0	0	0	0	0	0	0	0	0	0	0	0	9	22	35	16	0	15
HAV_5494	HAV_5494_S48_R1_001.fastq.gz	Y2019	K64	Ames 27121	nss	HN	N	sp3	spb2	1527	1	5	27	rep1	41	26	42	32	41	36	40	26	36	152	101	113	33	22	48	0	0	0	0	0	0	0	0	0	0	0	0	0	0	0	35	0	13	0	0
HAV_5495	HAV_5495_S56_R1_001.fastq.gz	Y2019	K64	Ames 27121	nss	HN	N	sp3	spb2	1527	1	5	27	rep2	39	17	18	19	23	25	25	25	33	49	31	32	12	14	28	0	0	0	0	0	0	0	0	0	0	0	0	0	0	0	25	19	24	11	14
HAV_5496	HAV_5496_S64_R1_001.fastq.gz	Y2019	K64	Ames 27121	nss	HN	N	sp3	spb2	1527	1	5	27	rep3	61	54	55	42	43	58	40	45	60	47	39	31	45	46	53	0	0	0	0	0	0	0	0	0	0	0	0	0	0	0	136	67	77	38	65
HAV_5497	HAV_5497_S5_R1_001.fastq.gz	Y2019	TZI10	PI 506248	ts	HN	N	sp3	spb3	1529	1	5	29	rep1	119	60	67	53	82	70	59	69	96	134	105	76	67	72	76	0	0	0	0	6	0	0	0	0	7	0	0	0	0	0	0	0	0	0	0
HAV_5498	HAV_5498_S14_R1_001.fastq.gz	Y2019	TZI10	PI 506248	ts	HN	N	sp3	spb3	1529	1	5	29	rep2	99	50	65	58	79	75	70	76	85	104	74	64	70	66	77	0	0	0	0	0	0	0	0	0	0	0	0	0	0	0	0	0	0	0	0
HAV_5499	HAV_5499_S23_R1_001.fastq.gz	Y2019	TZI10	PI 506248	ts	HN	N	sp3	spb3	1529	1	5	29	rep3	80	36	49	45	65	43	45	35	60	14	16	7	43	33	54	0	0	0	0	0	0	0	0	0	0	0	0	0	0	0	0	0	0	0	0
HAV_5500	HAV_5500_S32_R1_001.fastq.gz	Y2019	NC366	Ames 27179	mixed	HN	N	sp3	spb3	1532	1	5	32	rep1	156	74	101	86	106	119	104	72	121	0	0	0	83	90	118	0	0	0	0	0	0	0	0	0	0	0	0	0	0	0	0	0	0	0	0
HAV_5501	HAV_5501_S41_R1_001.fastq.gz	Y2019	NC366	Ames 27179	mixed	HN	N	sp3	spb3	1532	1	5	32	rep2	55	40	57	36	65	59	37	33	53	8	4	5	50	57	53	0	0	0	0	0	0	0	0	0	0	0	0	0	0	0	0	0	0	0	0
HAV_5502	HAV_5502_S49_R1_001.fastq.gz	Y2019	NC366	Ames 27179	mixed	HN	N	sp3	spb3	1532	1	5	32	rep3	65	37	51	41	58	58	57	54	72	43	33	37	36	36	63	0	0	0	0	0	0	0	0	0	0	0	0	0	0	0	206	116	140	84	110
HAV_5503	HAV_5503_S57_R1_001.fastq.gz	Y2019	TZI11	PI 540745	ts	HN	N	sp3	spb3	1534	1	5	34	rep1	19	5	20	16	14	14	9	10	9	13	12	12	11	8	14	0	0	0	0	0	0	0	0	0	0	0	0	0	0	0	0	0	0	0	0
HAV_5504	HAV_5504_S65_R1_001.fastq.gz	Y2019	TZI11	PI 540745	ts	HN	N	sp3	spb3	1534	1	5	34	rep2	24	13	10	19	16	18	18	10	30	6	6	5	9	21	23	0	0	0	0	0	0	0	0	0	0	0	0	0	0	0	0	0	0	0	0
HAV_5506	HAV_5506_S15_R1_001.fastq.gz	Y2019	KY226	Ames 27131	mixed	HN	N	sp3	spb3	1535	1	5	35	rep1	4	2	0	0	0	0	0	0	0	132	125	123	0	0	0	0	0	0	0	0	0	0	0	0	0	0	0	0	0	0	27	18	11	0	15
HAV_5507	HAV_5507_S24_R1_001.fastq.gz	Y2019	KY226	Ames 27131	mixed	HN	N	sp3	spb3	1535	1	5	35	rep2	9	6	15	7	17	13	12	15	11	45	53	40	11	9	20	0	0	0	0	0	0	0	0	0	0	0	0	0	0	0	0	0	0	0	0
HAV_5508	HAV_5508_S20_R1_001.fastq.gz	Y2019	KY226	Ames 27131	mixed	HN	N	sp3	spb3	1535	1	5	35	rep3	38	29	25	29	19	28	19	25	33	82	70	68	21	16	28	0	0	0	0	0	0	0	0	0	0	0	0	0	0	0	55	45	40	23	30
HAV_5509	HAV_5509_S21_R1_001.fastq.gz	Y2019	MO1W	PI 558520	nss	HN	N	sp3	spb3	1537	1	5	37	rep1	62	32	38	32	43	50	37	27	37	60	54	36	25	28	55	0	0	0	0	0	0	0	0	0	0	0	0	0	0	0	0	0	0	0	0
HAV_5510	HAV_5510_S50_R1_001.fastq.gz	Y2019	MO1W	PI 558520	nss	HN	N	sp3	spb3	1537	1	5	37	rep2	27	14	14	20	24	21	7	12	16	74	55	34	13	15	21	0	0	0	0	0	0	0	0	0	0	0	0	0	0	0	0	0	0	0	0
HAV_5511	HAV_5511_S58_R1_001.fastq.gz	Y2019	MO1W	PI 558520	nss	HN	N	sp3	spb3	1537	1	5	37	rep3	31	27	29	20	18	14	19	30	26	18	19	13	20	17	26	0	0	10	11	0	0	0	4	0	6	0	0	14	12	16	0	0	0	0	0
HAV_5512	HAV_5512_S66_R1_001.fastq.gz	Y2019	H100	Ames 22748	ss	HN	N	sp3	spb3	1540	1	5	40	rep1	80	50	74	41	58	67	52	49	70	22	30	31	56	54	65	0	0	0	0	0	0	0	0	0	0	0	0	0	0	0	22	29	0	0	23
HAV_5513	HAV_5513_S7_R1_001.fastq.gz	Y2019	H100	Ames 22748	ss	HN	N	sp3	spb3	1540	1	5	40	rep2	113	67	65	49	79	74	59	55	94	30	20	16	74	62	100	0	0	0	0	0	0	0	0	0	0	0	0	0	0	0	34	29	0	0	0
HAV_5514	HAV_5514_S16_R1_001.fastq.gz	Y2019	H100	Ames 22748	ss	HN	N	sp3	spb3	1540	1	5	40	rep3	22	7	18	5	3	22	16	29	18	20	19	8	14	15	10	0	0	0	0	0	0	0	0	0	0	0	0	0	0	0	86	42	60	40	49
HAV_5515	HAV_5515_S25_R1_001.fastq.gz	Y2019	TZI18	PI 506253	ts	HN	N	sp3	spb3	1541	1	5	41	rep1	42	38	37	26	26	54	22	23	39	96	97	88	34	31	43	0	0	0	0	0	0	0	0	0	0	0	0	0	0	0	0	0	0	0	0
HAV_5516	HAV_5516_S22_R1_001.fastq.gz	Y2019	TZI18	PI 506253	ts	HN	N	sp3	spb3	1541	1	5	41	rep2	12	7	5	4	14	14	6	13	13	89	65	51	8	12	14	0	0	0	0	0	0	0	0	0	0	0	0	0	0	0	49	0	16	16	0
HAV_5517	HAV_5517_S43_R1_001.fastq.gz	Y2019	TZI18	PI 506253	ts	HN	N	sp3	spb3	1541	1	5	41	rep3	26	21	22	10	17	18	21	19	18	27	19	17	19	17	20	14	0	13	8	0	0	0	19	0	12	16	0	11	0	17	0	0	0	0	0
HAV_5518	HAV_5518_S51_R1_001.fastq.gz	Y2019	B73HTRHM	Ames 27065	ss	HN	N	sp4	spb1	1544	1	5	44	rep1	15	15	9	11	10	8	11	10	16	100	72	60	14	7	14	0	0	0	0	0	0	0	0	0	0	0	0	0	0	0	34	30	15	0	17
HAV_5519	HAV_5519_S59_R1_001.fastq.gz	Y2019	B73HTRHM	Ames 27065	ss	HN	N	sp4	spb1	1544	1	5	44	rep2	16	8	9	7	6	12	4	11	6	48	44	30	5	9	12	0	0	0	0	0	0	0	0	0	0	0	0	0	0	0	0	0	0	0	0
HAV_5520	HAV_5520_S67_R1_001.fastq.gz	Y2019	B73HTRHM	Ames 27065	ss	HN	N	sp4	spb1	1544	1	5	44	rep3	70	37	48	43	52	44	36	37	54	73	44	50	48	38	58	0	0	0	0	0	0	0	0	0	0	0	0	0	0	0	38	0	0	0	0
HAV_5521	HAV_5521_S8_R1_001.fastq.gz	Y2019	CH701-30	Ames 27069	nss	HN	N	sp4	spb1	1546	1	5	46	rep1	50	31	51	28	48	46	38	35	46	57	51	34	25	46	34	0	0	0	0	0	0	0	0	0	0	0	0	0	0	0	52	0	0	0	0
HAV_5522	HAV_5522_S17_R1_001.fastq.gz	Y2019	CH701-30	Ames 27069	nss	HN	N	sp4	spb1	1546	1	5	46	rep2	52	22	61	33	33	44	40	31	44	148	130	120	38	31	47	0	0	0	0	0	0	0	0	0	0	0	0	0	0	0	0	0	0	0	0
HAV_5523	HAV_5523_S26_R1_001.fastq.gz	Y2019	CH701-30	Ames 27069	nss	HN	N	sp4	spb1	1546	1	5	46	rep3	111	69	78	61	74	78	70	72	88	60	49	44	56	68	91	0	0	0	0	0	0	0	0	0	0	0	0	0	0	0	53	0	0	0	0
HAV_5524	HAV_5524_S35_R1_001.fastq.gz	Y2019	IDS28	PI 686059	popcorn	HN	N	sp4	spb1	1547	1	5	47	rep1	62	27	29	32	51	46	31	33	49	33	24	17	32	30	56	0	0	0	0	0	0	0	0	0	0	0	0	0	0	0	0	0	0	0	0
HAV_5525	HAV_5525_S44_R1_001.fastq.gz	Y2019	IDS28	PI 686059	popcorn	HN	N	sp4	spb1	1547	1	5	47	rep2	79	38	65	36	52	53	45	52	59	24	12	8	38	39	45	0	0	0	0	0	0	0	0	0	0	0	0	0	0	0	12	0	0	0	0
HAV_5526	HAV_5526_S52_R1_001.fastq.gz	Y2019	IDS28	PI 686059	popcorn	HN	N	sp4	spb1	1547	1	5	47	rep3	70	55	61	36	55	61	42	34	62	113	92	75	23	43	48	0	0	0	0	0	0	0	0	0	0	0	0	0	0	0	0	0	0	0	0
HAV_5527	HAV_5527_S60_R1_001.fastq.gz	Y2019	Check_B73xMo17			HN	N	sp4	spb1	1550	1	5	50	rep1	72	37	55	46	54	51	31	46	38	55	47	36	31	31	51	0	0	0	0	0	0	0	0	0	0	0	0	0	0	0	32	26	0	0	0
HAV_5528	HAV_5528_S68_R1_001.fastq.gz	Y2019	Check_B73xMo17			HN	N	sp4	spb1	1550	1	5	50	rep2	94	54	58	58	83	75	48	62	83	22	15	15	75	59	92	0	0	0	0	0	0	0	0	0	0	0	0	0	0	0	0	0	0	0	0
HAV_5529	HAV_5529_S69_R1_001.fastq.gz	Y2019	Check_B73xMo17			HN	N	sp4	spb1	1550	1	5	50	rep3	47	22	30	21	26	28	29	16	28	29	20	23	34	19	31	0	0	0	0	0	0	0	0	0	0	0	0	0	0	0	0	0	0	0	0
HAV_5530	HAV_5530_S77_R1_001.fastq.gz	Y2019	B84	PI 608767	ss	HN	N	sp4	spb1	1552	1	5	52	rep1	20	16	9	13	9	7	4	13	11	54	56	42	13	9	4	0	0	0	0	0	0	0	0	0	0	0	0	0	0	0	0	0	0	0	0
HAV_5531	HAV_5531_S85_R1_001.fastq.gz	Y2019	B84	PI 608767	ss	HN	N	sp4	spb1	1552	1	5	52	rep2	107	49	66	76	79	58	72	67	85	23	15	5	60	65	66	0	0	0	0	0	0	0	0	0	0	0	0	0	0	0	0	0	0	0	0
HAV_5532	HAV_5532_S23_R1_001.fastq.gz	Y2019	B84	PI 608767	ss	HN	N	sp4	spb1	1552	1	5	52	rep3	253	155	178	153	194	175	114	125	204	6	8	6	145	143	195	0	0	0	0	0	0	0	0	0	0	0	0	0	0	0	63	38	37	28	41
HAV_5533	HAV_5533_S24_R1_001.fastq.gz	Y2019	A632	PI 587140	ss	HN	N	sp4	spb1	1553	1	5	53	rep1	100	59	55	49	76	72	58	55	72	35	33	32	53	68	86	0	0	0	0	0	0	0	0	0	0	0	0	0	0	0	0	0	29	0	0
HAV_5534	HAV_5534_S109_R1_001.fastq.gz	Y2019	A632	PI 587140	ss	HN	N	sp4	spb1	1553	1	5	53	rep2	63	38	51	42	56	48	42	41	48	61	46	38	43	30	63	12	0	9	0	8	13	0	0	0	15	20	0	8	11	13	0	0	0	0	0
HAV_5535	HAV_5535_S117_R1_001.fastq.gz	Y2019	A632	PI 587140	ss	HN	N	sp4	spb1	1553	1	5	53	rep3	162	101	126	110	134	147	97	100	130	0	0	0	84	96	142	0	0	0	0	0	0	0	0	0	0	0	0	0	0	0	60	0	0	15	0
HAV_5536	HAV_5536_S125_R1_001.fastq.gz	Y2019	B164	Ames 27066	mixed	HN	N	sp4	spb1	1555	1	5	55	rep1	21	10	18	9	21	25	16	19	14	342	243	226	15	14	23	0	0	0	0	0	0	0	0	0	0	0	0	0	0	0	0	0	0	0	0
HAV_5537	HAV_5537_S70_R1_001.fastq.gz	Y2019	B164	Ames 27066	mixed	HN	N	sp4	spb1	1555	1	5	55	rep2	80	48	58	46	61	59	42	48	80	59	47	39	48	64	69	0	0	0	0	0	0	0	0	0	0	0	0	0	0	0	0	0	0	0	0
HAV_5538	HAV_5538_S78_R1_001.fastq.gz	Y2019	B164	Ames 27066	mixed	HN	N	sp4	spb1	1555	1	5	55	rep3	60	36	40	26	38	41	32	32	41	364	302	253	30	32	53	0	0	0	0	0	0	0	0	0	0	0	0	0	0	0	0	0	0	0	0
HAV_5539	HAV_5539_S86_R1_001.fastq.gz	Y2019	NC306	Ames 27149	ss	HN	N	sp4	spb2	1558	1	5	58	rep1	144	82	107	92	117	117	86	67	107	10	10	12	90	88	110	0	0	0	7	0	0	0	0	0	9	0	0	0	0	9	0	0	0	0	0
HAV_5540	HAV_5540_S94_R1_001.fastq.gz	Y2019	NC306	Ames 27149	ss	HN	N	sp4	spb2	1558	1	5	58	rep2	125	62	81	62	106	99	67	80	92	0	0	0	77	79	80	0	0	0	0	0	0	0	0	0	0	0	0	0	0	14	61	0	0	0	0
HAV_5541	HAV_5541_S102_R1_001.fastq.gz	Y2019	NC306	Ames 27149	ss	HN	N	sp4	spb2	1558	1	5	58	rep3	291	154	183	164	175	196	151	143	225	10	8	15	145	151	228	0	0	0	0	0	0	0	0	0	0	0	0	0	0	0	0	0	0	0	0
HAV_5542	HAV_5542_S110_R1_001.fastq.gz	Y2019	OS420	NSL 65874	nss	HN	N	sp4	spb2	1559	1	5	59	rep1	63	35	33	40	63	66	43	47	54	18	24	22	53	24	63	0	0	13	0	0	0	0	0	0	0	8	0	0	0	0	66	30	34	29	32
HAV_5543	HAV_5543_S118_R1_001.fastq.gz	Y2019	OS420	NSL 65874	nss	HN	N	sp4	spb2	1559	1	5	59	rep2	496	250	333	241	307	337	265	279	322	4	11	5	271	217	349	0	0	0	0	0	0	0	0	0	0	0	0	0	0	0	263	164	177	102	139
HAV_5544	HAV_5544_S126_R1_001.fastq.gz	Y2019	OS420	NSL 65874	nss	HN	N	sp4	spb2	1559	1	5	59	rep3	362	199	253	189	258	256	194	207	259	12	4	3	179	209	281	0	0	0	0	0	0	0	0	0	0	0	0	0	0	0	43	26	33	21	15
HAV_5545	HAV_5545_S71_R1_001.fastq.gz	Y2019	NC364	Ames 27178	mixed	HN	N	sp4	spb2	1562	1	5	62	rep1	21	16	11	14	16	23	11	19	18	804	594	507	9	13	10	36	13	51	20	26	25	11	37	0	29	41	26	45	38	43	49	22	18	14	0
HAV_5546	HAV_5546_S79_R1_001.fastq.gz	Y2019	NC364	Ames 27178	mixed	HN	N	sp4	spb2	1562	1	5	62	rep2	68	41	43	45	51	57	37	43	45	0	0	0	35	41	53	0	0	0	0	0	0	0	0	0	0	0	0	0	0	0	53	0	0	0	16
HAV_5547	HAV_5547_S87_R1_001.fastq.gz	Y2019	NC364	Ames 27178	mixed	HN	N	sp4	spb2	1562	1	5	62	rep3	81	55	66	51	70	70	46	59	74	85	78	69	49	50	80	15	0	5	15	0	0	9	17	9	17	22	13	21	9	17	0	0	0	0	0
HAV_5548	HAV_5548_S25_R1_001.fastq.gz	Y2019	NC328	Ames 27160	ss	HN	N	sp4	spb2	1564	1	5	64	rep1	47	28	33	25	37	39	16	21	34	30	30	20	24	28	55	0	0	0	0	0	0	0	0	0	0	0	0	0	0	0	0	0	0	0	0
HAV_5549	HAV_5549_S103_R1_001.fastq.gz	Y2019	NC328	Ames 27160	ss	HN	N	sp4	spb2	1564	1	5	64	rep2	58	38	43	32	29	43	41	24	47	28	11	26	24	27	44	0	0	0	0	0	0	0	0	0	0	0	0	0	0	0	0	0	0	0	16
HAV_5550	HAV_5550_S111_R1_001.fastq.gz	Y2019	NC328	Ames 27160	ss	HN	N	sp4	spb2	1564	1	5	64	rep3	71	37	63	37	37	50	36	27	54	42	31	47	30	29	54	0	0	0	0	0	0	0	0	0	0	0	0	0	0	0	0	0	0	0	0
HAV_5551	HAV_5551_S119_R1_001.fastq.gz	Y2019	NC326	Ames 27159	ss	HN	N	sp4	spb2	1566	1	5	66	rep1	36	21	25	23	25	25	26	17	18	16	11	9	14	16	25	0	0	0	0	0	0	0	0	0	0	0	0	0	0	0	53	0	0	0	0
HAV_5552	HAV_5552_S127_R1_001.fastq.gz	Y2019	NC326	Ames 27159	ss	HN	N	sp4	spb2	1566	1	5	66	rep2	40	23	36	30	42	28	28	38	52	23	8	12	28	21	33	0	0	0	0	0	0	0	0	0	0	0	0	0	0	0	56	41	55	26	28
HAV_5553	HAV_5553_S72_R1_001.fastq.gz	Y2019	NC326	Ames 27159	ss	HN	N	sp4	spb2	1566	1	5	66	rep3	181	80	111	95	140	138	104	106	139	23	9	11	97	97	160	17	0	13	8	0	0	0	0	0	5	13	0	18	10	13	0	0	0	0	0
HAV_5554	HAV_5554_S80_R1_001.fastq.gz	Y2019	IL14H	Ames 27118	sweet	HN	N	sp4	spb2	1567	1	5	67	rep1	325	157	197	169	224	225	156	184	239	42	39	28	178	156	248	0	0	0	0	0	0	0	0	0	0	0	0	0	0	0	194	98	129	85	106
HAV_5555	HAV_5555_S88_R1_001.fastq.gz	Y2019	IL14H	Ames 27118	sweet	HN	N	sp4	spb2	1567	1	5	67	rep2	39	14	15	16	25	27	14	22	26	57	35	43	16	18	25	0	0	0	0	0	0	0	0	0	0	0	0	0	0	0	390	250	298	141	212
HAV_5556	HAV_5556_S26_R1_001.fastq.gz	Y2019	IL14H	Ames 27118	sweet	HN	N	sp4	spb2	1567	1	5	67	rep3	42	21	22	16	26	34	25	25	38	77	71	53	20	16	37	7	0	0	0	0	0	0	0	0	0	0	0	0	0	8	45	28	31	11	21
HAV_5557	HAV_5557_S104_R1_001.fastq.gz	Y2019	NC344	Ames 27168	nss	HN	N	sp4	spb2	1570	1	5	70	rep1	137	65	82	78	93	121	88	69	109	32	20	21	91	87	100	0	0	0	0	0	0	0	0	0	0	0	0	0	0	0	50	0	0	0	0
HAV_5558	HAV_5558_S112_R1_001.fastq.gz	Y2019	NC344	Ames 27168	nss	HN	N	sp4	spb2	1570	1	5	70	rep2	63	41	47	31	47	64	46	49	59	84	61	63	62	39	55	0	0	0	0	0	0	0	0	0	0	12	0	0	0	11	62	0	0	0	0
HAV_5559	HAV_5559_S120_R1_001.fastq.gz	Y2019	NC344	Ames 27168	nss	HN	N	sp4	spb2	1570	1	5	70	rep3	67	43	49	33	41	42	40	38	51	81	63	71	33	32	45	22	18	27	29	25	31	18	36	10	35	44	39	44	42	55	0	0	0	0	0
HAV_5560	HAV_5560_S128_R1_001.fastq.gz	Y2019	VA26	PI 587149	nss	HN	N	sp4	spb3	1572	1	5	72	rep1	46	24	30	24	35	19	21	27	39	75	57	57	18	13	52	16	0	12	14	15	0	13	0	0	10	8	10	0	21	18	0	0	47	0	0
HAV_5561	HAV_5561_S73_R1_001.fastq.gz	Y2019	VA26	PI 587149	nss	HN	N	sp4	spb3	1572	1	5	72	rep2	53	27	35	26	20	35	17	26	47	62	51	46	36	35	41	0	0	0	0	0	0	0	0	0	0	0	0	0	0	0	0	0	0	0	0
HAV_5562	HAV_5562_S81_R1_001.fastq.gz	Y2019	VA26	PI 587149	nss	HN	N	sp4	spb3	1572	1	5	72	rep3	21	4	11	11	6	8	8	9	8	462	386	351	9	11	8	0	0	0	0	0	0	0	0	0	14	0	8	0	7	0	51	0	0	0	0
HAV_5563	HAV_5563_S89_R1_001.fastq.gz	Y2019	VA22	Ames 19328	nss	HN	N	sp4	spb3	1574	1	5	74	rep1	386	195	234	189	296	244	182	183	277	122	76	63	203	221	302	0	0	0	0	0	0	0	0	0	0	0	0	0	0	0	0	0	0	0	0
HAV_5564	HAV_5564_S27_R1_001.fastq.gz	Y2019	VA22	Ames 19328	nss	HN	N	sp4	spb3	1574	1	5	74	rep2	209	71	114	96	123	143	112	129	188	0	0	0	109	103	191	0	0	0	0	0	0	0	0	0	0	0	0	0	0	0	47	25	24	20	30
HAV_5565	HAV_5565_S105_R1_001.fastq.gz	Y2019	VA22	Ames 19328	nss	HN	N	sp4	spb3	1574	1	5	74	rep3	40	16	37	18	29	36	28	22	48	56	37	43	26	32	38	0	0	0	0	0	0	0	0	0	0	0	0	0	0	0	0	0	0	0	0
HAV_5566	HAV_5566_S113_R1_001.fastq.gz	Y2019	CI90C	Ames 31534	mixed	HN	N	sp4	spb3	1576	1	5	76	rep1	108	53	58	66	95	77	61	71	73	0	0	0	64	63	98	10	10	15	28	0	0	0	14	0	14	11	14	14	0	18	78	0	0	0	0
HAV_5567	HAV_5567_S121_R1_001.fastq.gz	Y2019	CI90C	Ames 31534	mixed	HN	N	sp4	spb3	1576	1	5	76	rep2	41	26	23	25	25	23	11	33	31	0	0	0	19	37	31	0	0	0	0	0	0	0	0	0	0	0	0	0	0	0	101	75	77	37	46
HAV_5568	HAV_5568_S129_R1_001.fastq.gz	Y2019	CI90C	Ames 31534	mixed	HN	N	sp4	spb3	1576	1	5	76	rep3	99	63	70	48	80	79	50	59	69	31	22	18	58	55	95	0	0	22	0	18	0	0	17	0	12	25	15	0	14	0	0	0	52	0	0
HAV_5569	HAV_5569_S74_R1_001.fastq.gz	Y2019	SD40	PI 606768	mixed	HN	N	sp4	spb3	1578	1	5	78	rep1	266	133	171	109	185	178	126	161	215	330	310	195	125	133	225	0	0	0	0	13	0	0	0	0	16	13	0	12	0	0	44	0	0	0	0
HAV_5570	HAV_5570_S82_R1_001.fastq.gz	Y2019	SD40	PI 606768	mixed	HN	N	sp4	spb3	1578	1	5	78	rep2	87	54	60	52	69	65	60	58	65	14	6	8	50	54	71	0	0	0	0	0	0	0	0	0	0	0	0	0	0	0	37	34	24	0	23
HAV_5571	HAV_5571_S90_R1_001.fastq.gz	Y2019	SD40	PI 606768	mixed	HN	N	sp4	spb3	1578	1	5	78	rep3	155	130	131	101	121	100	100	101	133	45	33	50	108	109	142	0	0	0	0	0	0	0	0	0	0	14	0	0	0	0	0	0	0	0	0
HAV_5572	HAV_5572_S98_R1_001.fastq.gz	Y2019	CI7	Ames 28367	nss	HN	N	sp4	spb3	1580	1	5	80	rep1	269	122	153	152	173	172	152	141	198	36	40	31	124	140	200	0	0	0	0	0	0	0	0	0	0	0	0	0	0	0	0	0	0	0	0
HAV_5573	HAV_5573_S106_R1_001.fastq.gz	Y2019	CI7	Ames 28367	nss	HN	N	sp4	spb3	1580	1	5	80	rep2	45	24	35	30	41	27	36	31	34	89	78	68	25	29	47	0	0	0	0	0	0	0	0	0	0	0	0	0	0	0	133	85	85	59	76
HAV_5574	HAV_5574_S114_R1_001.fastq.gz	Y2019	CI7	Ames 28367	nss	HN	N	sp4	spb3	1580	1	5	80	rep3	99	51	66	47	72	80	54	59	69	21	12	20	50	47	77	0	0	0	0	0	0	0	0	0	0	0	0	0	0	0	79	58	62	47	47
HAV_5575	HAV_5575_S122_R1_001.fastq.gz	Y2019	R4	Ames 27187	nss	HN	N	sp4	spb3	1581	1	5	81	rep1	73	49	60	61	74	78	58	69	72	486	350	307	62	57	74	0	0	7	0	0	0	0	0	0	10	0	0	0	0	11	42	0	0	5	0
HAV_5576	HAV_5576_S130_R1_001.fastq.gz	Y2019	R4	Ames 27187	nss	HN	N	sp4	spb3	1581	1	5	81	rep2	105	62	76	47	68	87	57	68	89	65	61	57	66	47	90	0	0	14	10	6	0	0	0	0	0	0	0	0	0	0	57	56	66	31	37
HAV_5577	HAV_5577_S75_R1_001.fastq.gz	Y2019	R4	Ames 27187	nss	HN	N	sp4	spb3	1581	1	5	81	rep3	632	324	427	330	418	414	316	404	479	116	112	82	303	356	535	62	46	96	54	78	57	38	65	18	63	84	36	69	58	104	22	0	0	0	0
HAV_5578	HAV_5578_S83_R1_001.fastq.gz	Y2019	VA99	Ames 24989	nss	HN	N	sp4	spb3	1584	1	5	84	rep1	168	108	107	94	130	139	117	109	135	192	123	119	89	95	134	0	0	0	0	0	0	0	0	0	0	0	0	0	0	0	57	0	0	0	0
HAV_5579	HAV_5579_S91_R1_001.fastq.gz	Y2019	VA99	Ames 24989	nss	HN	N	sp4	spb3	1584	1	5	84	rep2	53	31	27	26	41	25	18	33	29	197	184	147	25	26	27	0	0	0	0	0	0	0	0	0	0	0	0	0	0	0	0	0	0	0	0
HAV_5580	HAV_5580_S99_R1_001.fastq.gz	Y2019	VA99	Ames 24989	nss	HN	N	sp4	spb3	1584	1	5	84	rep3	63	26	46	32	45	40	36	26	41	99	60	59	29	29	34	15	0	17	0	15	0	0	12	0	0	0	0	0	0	0	0	0	0	0	0
HAV_5581	HAV_5581_S107_R1_001.fastq.gz	Y2019	HP301	PI 587131	popcorn	LN	N	sp1	spb1	2002	2	0	02	rep1	26	16	16	21	26	20	21	16	16	55	42	38	15	19	17	0	0	0	0	0	0	0	0	0	0	0	0	0	0	0	0	0	0	0	0
HAV_5582	HAV_5582_S115_R1_001.fastq.gz	Y2019	HP301	PI 587131	popcorn	LN	N	sp1	spb1	2002	2	0	02	rep2	100	38	64	53	61	66	47	55	70	47	38	47	57	69	79	0	0	0	0	0	0	0	0	0	0	0	0	0	0	0	0	0	0	0	0
HAV_5583	HAV_5583_S123_R1_001.fastq.gz	Y2019	HP301	PI 587131	popcorn	LN	N	sp1	spb1	2002	2	0	02	rep3	45	31	23	24	26	19	19	30	30	31	28	13	30	19	43	0	0	0	0	0	8	0	0	0	11	0	0	10	0	12	0	0	0	0	0
HAV_5584	HAV_5584_S131_R1_001.fastq.gz	Y2019	B57	PI 550472	nss	LN	N	sp1	spb1	2004	2	0	04	rep1	11	6	10	5	16	10	2	7	11	172	130	119	10	5	8	25	8	26	13	26	23	14	15	13	23	22	16	28	23	29	0	0	0	0	0
HAV_5585	HAV_5585_S76_R1_001.fastq.gz	Y2019	B57	PI 550472	nss	LN	N	sp1	spb1	2004	2	0	04	rep2	535	259	321	263	383	349	304	333	387	47	53	47	258	320	439	0	0	0	0	0	0	0	0	0	0	0	0	0	0	0	0	0	0	0	0
HAV_5586	HAV_5586_S84_R1_001.fastq.gz	Y2019	B57	PI 550472	nss	LN	N	sp1	spb1	2004	2	0	04	rep3	48	21	26	22	21	29	26	32	27	10	3	5	25	18	32	0	0	0	0	0	0	0	0	0	0	0	0	0	0	0	0	0	0	0	0
HAV_5587	HAV_5587_S92_R1_001.fastq.gz	Y2019	C103	Ames 19284	nss	LN	N	sp1	spb1	2006	2	0	06	rep1	37	20	39	26	36	34	35	19	39	9	15	8	18	20	45	24	19	27	24	26	28	18	30	9	38	38	23	37	30	55	38	0	27	16	0
HAV_5588	HAV_5588_S28_R1_001.fastq.gz	Y2019	C103	Ames 19284	nss	LN	N	sp1	spb1	2006	2	0	06	rep2	626	322	446	358	446	464	380	367	496	17	14	7	403	386	474	0	0	0	0	0	0	0	0	0	0	0	0	0	0	0	0	0	0	0	0
HAV_5589	HAV_5589_S108_R1_001.fastq.gz	Y2019	C103	Ames 19284	nss	LN	N	sp1	spb1	2006	2	0	06	rep3	28	9	17	11	15	13	13	7	14	24	10	20	11	12	15	0	0	0	0	0	0	0	0	0	0	0	0	0	0	0	0	0	0	0	0
HAV_5590	HAV_5590_S116_R1_001.fastq.gz	Y2019	B104	PI 594047	mixed	LN	N	sp1	spb1	2008	2	0	08	rep1	67	36	36	39	40	36	33	27	56	37	32	25	27	59	50	0	0	0	0	0	0	0	0	0	0	0	0	0	0	0	43	0	23	0	0
HAV_5591	HAV_5591_S124_R1_001.fastq.gz	Y2019	B104	PI 594047	mixed	LN	N	sp1	spb1	2008	2	0	08	rep2	75	63	41	45	52	56	56	51	59	126	111	88	48	60	60	0	0	0	0	0	0	0	0	0	0	0	0	0	0	0	25	19	31	0	0
HAV_5592	HAV_5592_S132_R1_001.fastq.gz	Y2019	B104	PI 594047	mixed	LN	N	sp1	spb1	2008	2	0	08	rep3	115	77	80	72	76	82	71	77	76	235	191	181	71	70	106	0	0	0	0	0	0	0	0	0	0	0	0	0	0	0	0	0	0	0	0
HAV_5593	HAV_5593_S1_R1_001.fastq.gz	Y2019	H95	Ames 19319	nss	LN	N	sp1	spb1	2009	2	0	09	rep1	122	60	85	56	82	79	55	76	80	10	12	1	66	54	102	0	0	0	0	0	11	0	0	0	18	12	0	9	0	11	0	0	0	0	0
HAV_5594	HAV_5594_S10_R1_001.fastq.gz	Y2019	H95	Ames 19319	nss	LN	N	sp1	spb1	2009	2	0	09	rep2	0	0	0	0	36	8	22	9	0	0	5	0	0	9	10	0	0	0	0	0	0	0	0	0	0	0	0	0	0	0	0	0	0	0	0
HAV_5595	HAV_5595_S19_R1_001.fastq.gz	Y2019	H95	Ames 19319	nss	LN	N	sp1	spb1	2009	2	0	09	rep3	66	43	72	44	52	57	51	45	63	109	91	66	44	40	74	0	0	0	0	0	0	0	0	0	0	0	0	0	0	0	48	0	0	0	0
HAV_5596	HAV_5596_S28_R1_001.fastq.gz	Y2019	Check_B73xMo17			LN	N	sp1	spb1	2011	2	0	11	rep1	107	55	60	63	51	69	56	51	76	42	25	21	51	65	75	12	15	14	14	17	0	15	18	0	22	19	10	19	16	18	23	0	0	0	0
HAV_5597	HAV_5597_S29_R1_001.fastq.gz	Y2019	Check_B73xMo17			LN	N	sp1	spb1	2011	2	0	11	rep2	79	49	56	42	61	47	49	41	56	12	12	9	45	41	52	13	15	24	13	23	22	20	21	9	20	24	21	26	15	28	0	0	0	0	41
HAV_5598	HAV_5598_S45_R1_001.fastq.gz	Y2019	Check_B73xMo17			LN	N	sp1	spb1	2011	2	0	11	rep3	223	149	128	120	148	172	126	124	140	95	59	77	124	106	163	32	7	32	23	29	24	15	23	13	29	41	17	28	33	33	31	0	0	0	0
HAV_5599	HAV_5599_S53_R1_001.fastq.gz	Y2019	K55	Ames 22754	nss	LN	N	sp1	spb1	2013	2	0	13	rep1	390	227	273	212	293	302	228	225	304	0	0	0	215	227	312	0	0	0	0	0	0	0	0	0	0	0	0	0	0	0	0	0	0	0	0
HAV_5600	HAV_5600_S61_R1_001.fastq.gz	Y2019	K55	Ames 22754	nss	LN	N	sp1	spb1	2013	2	0	13	rep2	184	100	124	109	143	126	91	90	144	34	15	10	111	83	131	0	0	0	0	0	0	0	0	0	0	9	0	14	0	0	0	0	0	0	0
HAV_5601	HAV_5601_S2_R1_001.fastq.gz	Y2019	K55	Ames 22754	nss	LN	N	sp1	spb1	2013	2	0	13	rep3	25	16	26	25	21	12	25	18	16	0	0	0	14	22	29	0	0	16	9	10	22	9	24	0	19	13	0	9	25	16	0	48	0	0	0
HAV_5602	HAV_5602_S11_R1_001.fastq.gz	Y2019	NC250	PI 550555	ss	LN	N	sp1	spb2	2015	2	0	15	rep1	42	11	17	24	16	30	21	21	17	68	46	48	10	12	26	19	0	22	18	10	20	14	8	0	27	21	22	21	17	24	0	0	0	0	0
HAV_5603	HAV_5603_S20_R1_001.fastq.gz	Y2019	NC250	PI 550555	ss	LN	N	sp1	spb2	2015	2	0	15	rep2	63	32	46	33	51	40	29	36	39	22	16	14	29	27	44	0	0	0	0	0	0	0	0	0	0	0	0	0	0	7	74	0	0	0	0
HAV_5604	HAV_5604_S30_R1_001.fastq.gz	Y2019	NC250	PI 550555	ss	LN	N	sp1	spb2	2015	2	0	15	rep3	63	35	35	40	29	35	41	22	54	149	102	121	35	24	49	22	18	29	22	23	15	16	22	0	32	35	24	28	18	34	0	0	0	0	0
HAV_5605	HAV_5605_S31_R1_001.fastq.gz	Y2019	NC232	Ames 12732	nss	LN	N	sp1	spb2	2018	2	0	18	rep1	79	48	67	42	53	56	29	40	62	106	66	76	36	46	61	12	0	27	19	28	26	17	25	20	41	28	19	20	21	26	18	10	25	0	0
HAV_5606	HAV_5606_S46_R1_001.fastq.gz	Y2019	NC232	Ames 12732	nss	LN	N	sp1	spb2	2018	2	0	18	rep2	94	51	68	33	74	65	48	55	80	0	0	0	52	35	46	0	0	0	20	13	0	0	14	0	12	0	0	15	0	15	52	45	39	23	31
HAV_5607	HAV_5607_S54_R1_001.fastq.gz	Y2019	NC232	Ames 12732	nss	LN	N	sp1	spb2	2018	2	0	18	rep3	224	130	139	127	138	136	106	132	160	12	4	1	136	98	180	0	0	16	0	0	17	0	0	0	0	14	0	12	0	0	48	29	33	22	28
HAV_5608	HAV_5608_S62_R1_001.fastq.gz	Y2019	N28HT	Ames 27138	mixed	LN	N	sp1	spb2	2020	2	0	20	rep1	15	7	15	12	11	12	10	19	10	12	19	7	6	7	14	0	0	0	0	0	0	0	0	0	0	0	0	0	0	0	0	0	0	0	0
HAV_5609	HAV_5609_S3_R1_001.fastq.gz	Y2019	N28HT	Ames 27138	mixed	LN	N	sp1	spb2	2020	2	0	20	rep2	50	28	36	32	35	37	31	30	39	44	20	23	24	36	37	18	9	17	13	23	15	7	23	13	24	19	20	20	15	26	0	62	0	0	0
HAV_5610	HAV_5610_S12_R1_001.fastq.gz	Y2019	N28HT	Ames 27138	mixed	LN	N	sp1	spb2	2020	2	0	20	rep3	34	21	25	21	33	18	19	14	31	53	48	30	14	18	27	26	24	27	26	33	26	12	24	18	45	32	25	43	33	43	0	0	0	0	0
HAV_5611	HAV_5611_S21_R1_001.fastq.gz	Y2019	NC230	Ames 12731	nss	LN	N	sp1	spb2	2022	2	0	22	rep1	115	59	85	48	87	67	51	60	99	31	13	16	69	58	101	0	0	13	12	13	0	13	0	0	12	14	0	0	11	8	21	9	0	0	0
HAV_5612	HAV_5612_S30_R1_001.fastq.gz	Y2019	NC230	Ames 12731	nss	LN	N	sp1	spb2	2022	2	0	22	rep2	24	12	23	0	10	10	0	17	8	0	7	2	7	0	20	0	0	0	0	20	8	0	13	0	17	13	11	47	0	0	0	0	0	0	0
HAV_5613	HAV_5613_S39_R1_001.fastq.gz	Y2019	NC230	Ames 12731	nss	LN	N	sp1	spb2	2022	2	0	22	rep3	54	30	43	22	48	36	37	29	51	11	6	14	27	44	54	0	0	7	20	0	0	0	0	0	17	15	8	0	0	14	44	28	33	20	23
HAV_5614	HAV_5614_S47_R1_001.fastq.gz	Y2019	NC302	Ames 27147	ts	LN	N	sp1	spb2	2024	2	0	24	rep1	4	5	3	6	7	5	6	8	10	48	19	23	3	5	3	0	0	0	0	0	0	0	0	0	0	0	0	0	0	0	0	0	0	0	0
HAV_5615	HAV_5615_S55_R1_001.fastq.gz	Y2019	NC302	Ames 27147	ts	LN	N	sp1	spb2	2024	2	0	24	rep2	9	6	11	11	11	10	6	9	9	15	21	11	13	8	10	0	0	0	0	0	0	0	0	0	0	0	0	0	0	0	0	0	0	0	0
HAV_5616	HAV_5616_S63_R1_001.fastq.gz	Y2019	NC302	Ames 27147	ts	LN	N	sp1	spb2	2024	2	0	24	rep3	12	4	11	6	17	7	11	5	7	34	36	28	7	1	5	0	0	0	0	0	0	0	0	0	0	0	0	0	0	0	0	0	0	0	0
HAV_5617	HAV_5617_S4_R1_001.fastq.gz	Y2019	NC298	Ames 27261	ts	LN	N	sp1	spb2	2026	2	0	26	rep1	28	0	9	14	19	16	11	23	22	2	6	7	17	11	22	0	0	25	5	0	0	0	29	0	14	13	17	0	18	5	0	0	0	0	0
HAV_5618	HAV_5618_S13_R1_001.fastq.gz	Y2019	NC298	Ames 27261	ts	LN	N	sp1	spb2	2026	2	0	26	rep2	12	9	14	13	16	13	9	12	11	88	57	71	3	10	14	0	9	8	0	0	0	0	0	0	18	13	0	11	0	17	0	0	0	0	0
HAV_5619	HAV_5619_S22_R1_001.fastq.gz	Y2019	NC298	Ames 27261	ts	LN	N	sp1	spb2	2026	2	0	26	rep3	75	35	41	42	55	51	39	31	59	52	45	43	59	31	60	0	0	0	0	0	0	0	0	0	0	0	0	0	0	0	0	0	0	0	0
HAV_5620	HAV_5620_S32_R1_001.fastq.gz	Y2019	NC352	Ames 27172	ts	LN	N	sp1	spb2	2027	2	0	27	rep1	66	57	61	47	61	63	51	64	62	20	19	12	46	39	60	0	0	0	0	0	0	0	0	0	0	0	0	0	0	0	0	0	0	0	0
HAV_5621	HAV_5621_S40_R1_001.fastq.gz	Y2019	NC352	Ames 27172	ts	LN	N	sp1	spb2	2027	2	0	27	rep2	33	27	44	19	27	34	23	26	20	13	7	14	16	17	25	11	0	0	10	14	0	8	9	0	10	9	12	0	0	21	0	0	0	0	0
HAV_5622	HAV_5622_S48_R1_001.fastq.gz	Y2019	NC352	Ames 27172	ts	LN	N	sp1	spb2	2027	2	0	27	rep3	233	120	161	118	166	176	144	137	158	15	7	13	144	139	211	24	13	32	15	17	22	16	17	10	25	29	17	27	17	30	0	0	0	0	0
HAV_5623	HAV_5623_S56_R1_001.fastq.gz	Y2019	SG18	PI 686066	popcorn	LN	N	sp1	spb3	2029	2	0	29	rep1	141	79	111	90	113	107	75	78	109	13	7	7	85	73	133	0	0	0	0	0	0	0	0	0	0	0	0	0	0	0	0	0	0	0	0
HAV_5624	HAV_5624_S64_R1_001.fastq.gz	Y2019	SG18	PI 686066	popcorn	LN	N	sp1	spb3	2029	2	0	29	rep2	72	31	51	25	51	43	46	38	50	15	11	5	44	46	53	0	0	0	0	0	0	0	0	0	9	0	0	0	0	0	0	0	0	0	0
HAV_5625	HAV_5625_S5_R1_001.fastq.gz	Y2019	SG18	PI 686066	popcorn	LN	N	sp1	spb3	2029	2	0	29	rep3	49	24	45	23	48	34	31	23	48	11	9	8	36	26	48	0	0	0	0	0	0	0	0	0	0	0	0	0	0	0	0	0	0	0	0
HAV_5626	HAV_5626_S14_R1_001.fastq.gz	Y2019	OH603	PI 573098	mixed	LN	N	sp1	spb3	2032	2	0	32	rep1	34	22	15	28	31	36	28	37	31	14	10	9	24	22	25	0	0	0	0	0	0	0	0	0	8	0	0	0	0	13	31	23	19	25	13
HAV_5627	HAV_5627_S23_R1_001.fastq.gz	Y2019	OH603	PI 573098	mixed	LN	N	sp1	spb3	2032	2	0	32	rep2	60	33	53	28	53	51	34	37	60	41	37	24	34	24	41	0	0	0	0	0	0	0	0	0	0	0	0	0	0	0	66	0	0	0	0
HAV_5628	HAV_5628_S32_R1_001.fastq.gz	Y2019	OH603	PI 573098	mixed	LN	N	sp1	spb3	2032	2	0	32	rep3	14	5	7	7	11	11	9	6	11	61	34	45	8	13	15	0	0	0	0	0	0	0	0	0	0	0	0	0	0	0	0	0	0	0	0
HAV_5629	HAV_5629_S41_R1_001.fastq.gz	Y2019	NC372	Ames 27182	ss	LN	N	sp1	spb3	2034	2	0	34	rep1	75	42	46	42	65	56	39	58	48	108	91	102	50	56	63	0	0	0	0	0	0	0	0	0	0	0	0	0	0	0	0	0	0	0	0
HAV_5630	HAV_5630_S49_R1_001.fastq.gz	Y2019	NC372	Ames 27182	ss	LN	N	sp1	spb3	2034	2	0	34	rep2	58	42	51	27	47	57	37	40	42	16	12	20	39	45	44	0	0	0	0	0	0	0	0	0	0	0	0	0	0	0	159	98	113	66	98
HAV_5631	HAV_5631_S57_R1_001.fastq.gz	Y2019	NC372	Ames 27182	ss	LN	N	sp1	spb3	2034	2	0	34	rep3	21	18	22	10	25	21	16	25	26	11	14	7	13	10	20	0	0	0	0	0	0	0	0	0	0	0	0	0	0	0	0	0	0	0	0
HAV_5632	HAV_5632_S65_R1_001.fastq.gz	Y2019	W401	Ames 27194	nss	LN	N	sp1	spb3	2035	2	0	35	rep1	268	149	182	133	242	203	146	160	222	34	29	22	160	184	243	0	0	0	0	0	0	0	0	0	0	0	0	0	0	0	0	0	0	0	0
HAV_5633	HAV_5633_S6_R1_001.fastq.gz	Y2019	W401	Ames 27194	nss	LN	N	sp1	spb3	2035	2	0	35	rep2	230	124	163	109	123	175	114	118	168	32	24	18	124	125	157	0	0	0	0	0	0	0	0	0	0	0	0	0	0	0	17	0	13	0	25
HAV_5634	HAV_5634_S15_R1_001.fastq.gz	Y2019	W401	Ames 27194	nss	LN	N	sp1	spb3	2035	2	0	35	rep3	64	34	55	44	63	54	43	36	54	56	45	60	39	39	49	0	0	0	0	0	0	0	0	0	0	0	0	0	0	0	0	0	0	0	18
HAV_5635	HAV_5635_S24_R1_001.fastq.gz	Y2019	Check_B73xMo17			LN	N	sp1	spb3	2038	2	0	38	rep1	474	267	288	248	324	293	258	271	345	51	29	24	272	256	371	0	0	0	0	0	0	0	0	0	0	0	0	0	0	0	0	0	0	0	0
HAV_5636	HAV_5636_S33_R1_001.fastq.gz	Y2019	Check_B73xMo17			LN	N	sp1	spb3	2038	2	0	38	rep2	73	52	65	51	63	66	49	55	74	56	43	48	42	52	71	17	8	16	11	11	17	18	0	0	12	25	13	26	22	26	0	0	0	0	0
HAV_5637	HAV_5637_S42_R1_001.fastq.gz	Y2019	Check_B73xMo17			LN	N	sp1	spb3	2038	2	0	38	rep3	29	21	15	29	19	23	11	16	33	12	13	12	14	18	30	0	0	0	0	0	0	0	0	0	0	0	0	0	0	0	0	0	0	0	0
HAV_5638	HAV_5638_S50_R1_001.fastq.gz	Y2019	SA24	PI 686065	popcorn	LN	N	sp1	spb3	2039	2	0	39	rep1	103	75	94	65	84	78	73	65	85	83	45	57	69	71	88	0	0	0	0	0	0	0	0	0	0	0	0	0	0	0	0	0	0	0	0
HAV_5639	HAV_5639_S58_R1_001.fastq.gz	Y2019	SA24	PI 686065	popcorn	LN	N	sp1	spb3	2039	2	0	39	rep2	66	32	51	43	60	46	37	42	57	31	19	17	37	36	51	0	0	0	0	0	0	0	0	0	0	0	0	0	0	0	0	0	0	0	0
HAV_5640	HAV_5640_S66_R1_001.fastq.gz	Y2019	SA24	PI 686065	popcorn	LN	N	sp1	spb3	2039	2	0	39	rep3	28	8	11	8	16	18	13	16	11	77	58	40	12	16	25	0	0	0	0	0	0	0	0	0	0	0	0	8	0	0	0	0	0	0	0
HAV_5641	HAV_5641_S7_R1_001.fastq.gz	Y2019	PA875	Ames 27185	nss	LN	N	sp1	spb3	2041	2	0	41	rep1	43	30	28	19	29	40	24	19	31	42	22	32	25	28	45	0	0	10	0	0	0	0	0	0	0	0	0	11	0	0	0	0	0	0	0
HAV_5642	HAV_5642_S16_R1_001.fastq.gz	Y2019	PA875	Ames 27185	nss	LN	N	sp1	spb3	2041	2	0	41	rep2	28	9	20	14	17	19	20	6	29	53	48	50	11	21	24	0	0	12	11	0	10	0	16	0	7	7	11	0	0	13	0	0	0	0	0
HAV_5643	HAV_5643_S25_R1_001.fastq.gz	Y2019	PA875	Ames 27185	nss	LN	N	sp1	spb3	2041	2	0	41	rep3	13	10	11	4	8	11	7	7	10	59	45	57	6	6	11	5	0	14	0	0	0	0	0	0	0	0	0	0	0	16	0	75	0	0	0
HAV_5644	HAV_5644_S34_R1_001.fastq.gz	Y2019	A554	PI 587138	nss	LN	N	sp2	spb1	2044	2	0	44	rep1	50	28	35	27	24	31	19	29	27	171	97	91	24	15	44	0	0	0	0	0	0	0	0	0	0	0	0	0	0	0	301	191	240	145	190
HAV_5645	HAV_5645_S43_R1_001.fastq.gz	Y2019	A554	PI 587138	nss	LN	N	sp2	spb1	2044	2	0	44	rep2	25	8	27	17	11	28	25	17	31	40	19	29	20	24	23	0	0	0	0	0	0	0	0	0	0	0	0	0	0	0	126	63	82	40	59
HAV_5646	HAV_5646_S51_R1_001.fastq.gz	Y2019	A554	PI 587138	nss	LN	N	sp2	spb1	2044	2	0	44	rep3	255	143	190	135	180	170	174	160	179	42	31	34	168	144	219	0	0	0	0	0	0	0	0	0	0	0	0	0	0	0	32	26	18	14	20
HAV_5647	HAV_5647_S59_R1_001.fastq.gz	Y2019	A659	NSL 81599	nss	LN	N	sp2	spb1	2046	2	0	46	rep1	20	21	18	12	15	16	14	16	18	46	35	24	14	19	14	15	0	20	16	11	27	16	9	8	23	28	15	17	22	37	0	0	0	0	0
HAV_5648	HAV_5648_S67_R1_001.fastq.gz	Y2019	A659	NSL 81599	nss	LN	N	sp2	spb1	2046	2	0	46	rep2	28	8	21	10	13	10	11	9	17	29	15	28	19	10	18	0	0	0	0	0	0	0	0	0	0	0	0	0	0	0	26	0	0	0	0
HAV_5649	HAV_5649_S8_R1_001.fastq.gz	Y2019	A659	NSL 81599	nss	LN	N	sp2	spb1	2046	2	0	46	rep3	42	26	19	17	30	27	18	19	31	15	11	14	24	29	32	0	0	0	0	0	0	0	0	0	0	0	0	0	0	0	17	27	15	0	10
HAV_5650	HAV_5650_S35_R1_001.fastq.gz	Y2019	A239	Ames 23405	nss	LN	N	sp2	spb1	2047	2	0	47	rep1	92	44	54	35	72	45	40	49	69	28	17	19	52	45	49	0	0	0	0	0	0	0	0	0	0	0	0	0	0	0	40	0	0	0	0
HAV_5651	HAV_5651_S26_R1_001.fastq.gz	Y2019	A239	Ames 23405	nss	LN	N	sp2	spb1	2047	2	0	47	rep2	20	6	15	8	8	7	11	6	11	30	22	20	5	11	17	0	0	0	0	0	0	0	0	0	0	0	0	0	0	0	0	0	0	0	0
HAV_5652	HAV_5652_S35_R1_001.fastq.gz	Y2019	A239	Ames 23405	nss	LN	N	sp2	spb1	2047	2	0	47	rep3	34	8	20	23	26	23	18	25	23	18	17	14	30	20	25	0	0	0	0	0	0	0	0	0	0	0	0	0	0	0	0	0	11	0	0
HAV_5653	HAV_5653_S44_R1_001.fastq.gz	Y2019	A556	Ames 23450	nss	LN	N	sp2	spb1	2050	2	0	50	rep1	11	3	6	1	7	7	8	6	5	50	19	37	4	5	6	0	0	0	0	0	0	0	0	0	0	0	0	0	0	0	0	0	0	0	0
HAV_5654	HAV_5654_S52_R1_001.fastq.gz	Y2019	A556	Ames 23450	nss	LN	N	sp2	spb1	2050	2	0	50	rep2	264	142	167	148	209	192	148	176	215	13	21	12	161	150	192	0	0	0	0	0	0	0	0	0	0	0	0	0	0	0	23	20	23	0	13
HAV_5655	HAV_5655_S60_R1_001.fastq.gz	Y2019	A556	Ames 23450	nss	LN	N	sp2	spb1	2050	2	0	50	rep3	23	19	22	17	12	27	11	8	21	143	112	96	18	15	20	0	0	18	12	0	0	0	0	0	14	0	0	0	15	13	38	21	37	23	23
HAV_5656	HAV_5656_S68_R1_001.fastq.gz	Y2019	C49A	Ames 27067	nss	LN	N	sp2	spb1	2051	2	0	51	rep1	54	0	46	0	0	0	10	0	17	0	0	0	0	16	0	0	0	0	0	0	0	0	0	0	0	0	0	0	0	0	49	0	18	16	18
HAV_5657	HAV_5657_S69_R1_001.fastq.gz	Y2019	C49A	Ames 27067	nss	LN	N	sp2	spb1	2051	2	0	51	rep2	0	0	0	22	26	3	0	0	19	8	0	5	6	8	8	0	0	0	0	0	0	0	0	0	0	0	0	0	0	0	177	99	133	53	81
HAV_5658	HAV_5658_S77_R1_001.fastq.gz	Y2019	C49A	Ames 27067	nss	LN	N	sp2	spb1	2051	2	0	51	rep3	55	23	38	28	37	36	33	31	35	11	6	9	24	17	34	0	0	0	0	0	0	0	0	0	0	0	0	0	0	0	23	12	56	0	0
HAV_5659	HAV_5659_S85_R1_001.fastq.gz	Y2019	A641	Ames 19311	mixed	LN	N	sp2	spb1	2053	2	0	53	rep1	25	17	19	25	24	22	14	17	24	15	19	21	21	14	30	0	0	0	0	0	0	0	0	0	0	0	0	0	0	0	313	167	218	127	171
HAV_5660	HAV_5660_S93_R1_001.fastq.gz	Y2019	A641	Ames 19311	mixed	LN	N	sp2	spb1	2053	2	0	53	rep2	13	12	15	11	17	13	8	21	17	21	20	11	17	14	14	0	0	0	0	0	0	0	0	0	0	0	0	0	0	0	102	0	0	0	0
HAV_5661	HAV_5661_S101_R1_001.fastq.gz	Y2019	A641	Ames 19311	mixed	LN	N	sp2	spb1	2053	2	0	53	rep3	35	24	17	38	42	42	39	25	31	33	24	26	19	30	37	0	0	0	0	0	0	0	0	0	0	0	0	0	0	0	0	0	0	0	0
HAV_5662	HAV_5662_S109_R1_001.fastq.gz	Y2019	CM174	Ames 19316	ss	LN	N	sp2	spb1	2055	2	0	55	rep1	39	10	20	19	25	19	13	23	28	21	14	13	19	13	20	16	0	16	16	34	23	15	12	12	14	18	11	12	0	24	0	0	0	0	0
HAV_5663	HAV_5663_S117_R1_001.fastq.gz	Y2019	CM174	Ames 19316	ss	LN	N	sp2	spb1	2055	2	0	55	rep2	37	34	34	23	32	37	29	39	45	21	16	19	35	23	35	0	0	0	0	9	0	0	0	0	0	11	0	0	0	0	0	0	0	0	0
HAV_5664	HAV_5664_S125_R1_001.fastq.gz	Y2019	CM174	Ames 19316	ss	LN	N	sp2	spb1	2055	2	0	55	rep3	34	25	27	25	30	34	32	25	39	62	54	49	27	35	42	0	0	0	0	0	0	0	0	0	0	0	0	0	0	0	0	0	0	0	0
HAV_5665	HAV_5665_S70_R1_001.fastq.gz	Y2019	F7	PI 257507	mixed	LN	N	sp2	spb2	2057	2	0	57	rep1	15	9	10	2	13	9	12	1	8	69	53	51	5	8	4	0	0	0	0	0	0	0	0	0	0	0	0	0	0	0	40	17	21	19	0
HAV_5666	HAV_5666_S78_R1_001.fastq.gz	Y2019	F7	PI 257507	mixed	LN	N	sp2	spb2	2057	2	0	57	rep2	12	6	6	8	12	10	11	11	18	24	20	25	12	8	18	0	0	0	0	0	0	0	0	0	0	0	0	0	0	0	0	0	0	0	0
HAV_5667	HAV_5667_S86_R1_001.fastq.gz	Y2019	F7	PI 257507	mixed	LN	N	sp2	spb2	2057	2	0	57	rep3	0	0	0	12	15	0	0	0	6	8	0	0	0	6	8	0	0	0	0	0	0	0	0	0	0	0	0	0	0	0	90	71	56	41	57
HAV_5668	HAV_5668_S94_R1_001.fastq.gz	Y2019	I29	PI 686057	popcorn	LN	N	sp2	spb2	2059	2	0	59	rep1	31	16	28	35	29	16	26	17	23	44	25	22	19	27	30	0	0	0	0	0	0	0	0	0	8	0	0	0	0	0	0	0	0	0	0
HAV_5669	HAV_5669_S36_R1_001.fastq.gz	Y2019	I29	PI 686057	popcorn	LN	N	sp2	spb2	2059	2	0	59	rep2	165	106	141	91	148	148	121	108	149	43	31	37	118	111	184	0	0	0	0	0	0	0	0	0	0	0	0	0	0	0	0	0	0	0	0
HAV_5670	HAV_5670_S110_R1_001.fastq.gz	Y2019	I29	PI 686057	popcorn	LN	N	sp2	spb2	2059	2	0	59	rep3	238	139	178	123	174	176	159	128	216	19	24	12	140	158	201	15	11	19	15	19	19	14	19	0	22	13	21	20	24	16	0	0	0	0	0
HAV_5671	HAV_5671_S118_R1_001.fastq.gz	Y2019	CO125	Ames 27106	nss	LN	N	sp2	spb2	2061	2	0	61	rep1	93	59	66	54	72	67	54	67	82	52	49	42	42	60	77	0	0	0	0	0	0	0	0	0	0	0	0	0	0	0	0	0	0	0	0
HAV_5672	HAV_5672_S126_R1_001.fastq.gz	Y2019	CO125	Ames 27106	nss	LN	N	sp2	spb2	2061	2	0	61	rep2	18	20	22	10	20	23	12	25	31	24	24	15	16	17	33	0	0	0	0	0	0	0	0	0	0	0	0	0	0	0	43	0	0	0	0
HAV_5673	HAV_5673_S71_R1_001.fastq.gz	Y2019	CO125	Ames 27106	nss	LN	N	sp2	spb2	2061	2	0	61	rep3	27	13	17	8	25	15	13	16	15	21	30	10	15	11	25	0	0	0	0	0	0	0	0	0	0	0	0	0	0	0	0	0	0	0	0
HAV_5674	HAV_5674_S79_R1_001.fastq.gz	Y2019	CM7	Ames 27070	nss	LN	N	sp2	spb2	2064	2	0	64	rep1	34	21	27	18	30	20	30	19	31	11	8	2	24	15	26	0	0	0	0	0	0	0	0	0	6	0	0	0	0	0	0	0	0	0	0
HAV_5675	HAV_5675_S87_R1_001.fastq.gz	Y2019	CM7	Ames 27070	nss	LN	N	sp2	spb2	2064	2	0	64	rep2	95	58	65	54	73	76	56	57	73	7	2	3	60	48	79	0	0	0	0	0	0	0	0	0	12	12	0	0	10	12	47	0	0	0	0
HAV_5676	HAV_5676_S95_R1_001.fastq.gz	Y2019	CM7	Ames 27070	nss	LN	N	sp2	spb2	2064	2	0	64	rep3	65	38	45	41	43	49	33	41	62	9	5	4	43	40	62	17	0	17	13	11	20	0	9	0	15	9	0	8	15	12	0	0	44	0	0
HAV_5677	HAV_5677_S103_R1_001.fastq.gz	Y2019	MS153	Ames 24734	nss	LN	N	sp2	spb2	2066	2	0	66	rep1	21	11	14	11	17	15	9	10	13	6	6	0	4	8	11	11	0	34	0	14	0	0	15	0	9	14	0	18	25	13	0	0	0	0	0
HAV_5678	HAV_5678_S111_R1_001.fastq.gz	Y2019	MS153	Ames 24734	nss	LN	N	sp2	spb2	2066	2	0	66	rep2	33	22	17	14	39	32	14	29	26	101	90	69	27	25	39	0	0	0	0	0	0	0	0	0	0	8	0	16	0	0	0	0	0	0	0
HAV_5679	HAV_5679_S119_R1_001.fastq.gz	Y2019	MS153	Ames 24734	nss	LN	N	sp2	spb2	2066	2	0	66	rep3	20	12	10	9	11	13	6	22	14	18	15	13	11	7	17	24	0	0	0	0	16	0	13	0	11	15	0	7	0	0	0	0	0	0	0
HAV_5680	HAV_5680_S127_R1_001.fastq.gz	Y2019	CMV3	Ames 27104	nss	LN	N	sp2	spb2	2068	2	0	68	rep1	61	31	31	22	48	44	22	39	43	65	41	48	29	29	48	0	0	0	0	0	0	0	0	0	0	0	0	0	0	0	50	0	0	0	0
HAV_5681	HAV_5681_S72_R1_001.fastq.gz	Y2019	CMV3	Ames 27104	nss	LN	N	sp2	spb2	2068	2	0	68	rep2	8	4	5	3	13	6	5	5	10	26	24	21	4	1	7	0	0	0	0	0	0	0	0	0	0	0	0	0	0	0	0	0	0	0	0
HAV_5682	HAV_5682_S80_R1_001.fastq.gz	Y2019	CMV3	Ames 27104	nss	LN	N	sp2	spb2	2068	2	0	68	rep3	50	31	39	34	43	42	32	43	52	79	54	42	47	46	35	0	0	8	0	0	4	0	0	0	0	0	0	0	0	5	0	18	35	0	0
HAV_5683	HAV_5683_S88_R1_001.fastq.gz	Y2019	CO106	Ames 27105	nss	LN	N	sp2	spb2	2069	2	0	69	rep1	12	8	5	10	9	14	5	4	10	29	24	28	9	7	17	0	0	0	0	0	0	0	0	0	0	0	0	0	0	0	0	67	0	0	0
HAV_5684	HAV_5684_S37_R1_001.fastq.gz	Y2019	CO106	Ames 27105	nss	LN	N	sp2	spb2	2069	2	0	69	rep2	67	35	40	45	59	45	46	22	48	24	24	30	31	54	68	15	10	20	11	22	21	15	13	12	20	26	12	25	18	24	0	0	0	0	0
HAV_5685	HAV_5685_S104_R1_001.fastq.gz	Y2019	CO106	Ames 27105	nss	LN	N	sp2	spb2	2069	2	0	69	rep3	16	7	7	7	11	15	2	8	5	88	56	68	7	10	11	0	0	0	0	0	0	0	0	0	0	0	0	0	0	0	0	0	0	0	0
HAV_5686	HAV_5686_S112_R1_001.fastq.gz	Y2019	NC332	Ames 27162	ts	LN	N	sp2	spb3	2072	2	0	72	rep1	8	6	7	13	11	11	5	11	15	72	44	58	7	7	13	0	0	0	0	0	0	0	0	0	0	0	0	0	0	0	0	0	0	0	0
HAV_5687	HAV_5687_S120_R1_001.fastq.gz	Y2019	NC332	Ames 27162	ts	LN	N	sp2	spb3	2072	2	0	72	rep2	58	37	32	32	41	40	40	33	34	104	70	64	26	27	62	24	0	19	7	9	14	13	19	12	14	14	14	23	16	16	0	0	0	0	0
HAV_5688	HAV_5688_S128_R1_001.fastq.gz	Y2019	NC332	Ames 27162	ts	LN	N	sp2	spb3	2072	2	0	72	rep3	28	14	22	12	14	12	7	17	15	82	63	70	16	9	17	0	0	0	0	11	0	0	0	0	0	9	0	13	0	11	0	32	11	0	0
HAV_5689	HAV_5689_S73_R1_001.fastq.gz	Y2019	ND246	PI 550490	mixed	LN	N	sp2	spb3	2074	2	0	74	rep1	13	4	5	3	5	8	5	5	8	26	16	16	7	7	7	0	0	0	0	0	0	0	0	0	0	0	0	0	0	0	16	23	0	0	0
HAV_5690	HAV_5690_S81_R1_001.fastq.gz	Y2019	ND246	PI 550490	mixed	LN	N	sp2	spb3	2074	2	0	74	rep2	8	8	6	6	2	7	8	5	5	131	115	88	3	6	11	0	0	0	0	0	0	0	0	0	0	0	0	0	0	0	0	0	0	0	0
HAV_5691	HAV_5691_S89_R1_001.fastq.gz	Y2019	ND246	PI 550490	mixed	LN	N	sp2	spb3	2074	2	0	74	rep3	44	32	32	32	39	27	30	33	37	231	179	152	26	20	56	0	0	18	26	13	14	12	8	0	13	23	15	9	15	16	21	0	0	0	0
HAV_5692	HAV_5692_S38_R1_001.fastq.gz	Y2019	OH43	Ames 19288	nss	LN	N	sp2	spb3	2075	2	0	75	rep1	52	41	44	44	41	51	38	45	26	24	19	13	33	35	57	0	12	0	0	0	0	0	0	0	11	0	0	0	0	12	0	0	0	0	0
HAV_5693	HAV_5693_S105_R1_001.fastq.gz	Y2019	OH43	Ames 19288	nss	LN	N	sp2	spb3	2075	2	0	75	rep2	42	32	35	25	28	26	18	22	26	9	7	10	23	14	38	0	0	0	0	0	0	0	0	0	0	0	0	0	0	0	0	0	0	0	0
HAV_5694	HAV_5694_S113_R1_001.fastq.gz	Y2019	OH43	Ames 19288	nss	LN	N	sp2	spb3	2075	2	0	75	rep3	40	27	28	18	26	24	22	20	35	12	18	11	31	18	36	16	11	14	23	21	17	25	13	0	31	28	22	23	9	27	0	0	0	0	0
HAV_5695	HAV_5695_S121_R1_001.fastq.gz	Y2019	NC316	Ames 27154		LN	N	sp2	spb3	2077	2	0	77	rep1	41	25	37	33	35	41	24	28	32	105	91	80	33	33	39	18	12	19	11	19	16	0	14	0	20	18	9	23	15	30	0	0	0	0	0
HAV_5696	HAV_5696_S129_R1_001.fastq.gz	Y2019	NC316	Ames 27154		LN	N	sp2	spb3	2077	2	0	77	rep2	41	20	22	21	18	38	24	14	36	41	34	24	24	19	32	0	0	0	9	0	11	0	11	0	12	11	10	6	0	14	0	0	0	0	0
HAV_5697	HAV_5697_S74_R1_001.fastq.gz	Y2019	NC316	Ames 27154		LN	N	sp2	spb3	2077	2	0	77	rep3	32	22	33	18	48	29	23	34	40	12	11	14	36	23	28	13	15	16	20	16	11	16	13	10	22	21	13	20	16	31	0	31	0	0	0
HAV_5698	HAV_5698_S82_R1_001.fastq.gz	Y2019	SD44	PI 524969	nss	LN	N	sp2	spb3	2080	2	0	80	rep1	8	2	4	8	4	11	2	2	4	47	44	44	1	3	8	0	0	0	0	0	0	0	0	0	0	0	0	0	0	0	54	0	0	0	0
HAV_5699	HAV_5699_S90_R1_001.fastq.gz	Y2019	SD44	PI 524969	nss	LN	N	sp2	spb3	2080	2	0	80	rep2	7	6	10	7	8	7	8	12	6	13	24	18	8	8	8	0	0	0	0	0	0	0	0	0	0	0	0	0	0	0	0	0	0	0	0
HAV_5700	HAV_5700_S98_R1_001.fastq.gz	Y2019	SD44	PI 524969	nss	LN	N	sp2	spb3	2080	2	0	80	rep3	25	0	10	14	20	9	8	20	17	23	17	9	6	16	20	0	0	0	0	0	0	0	0	0	0	0	0	0	0	0	24	18	15	9	20
HAV_5701	HAV_5701_S106_R1_001.fastq.gz	Y2019	VA59	Ames 19016	nss	LN	N	sp2	spb3	2081	2	0	81	rep1	25	7	29	13	22	13	15	15	25	49	29	29	14	15	16	0	0	0	0	0	0	0	0	0	0	0	0	0	0	0	0	0	0	0	0
HAV_5702	HAV_5702_S114_R1_001.fastq.gz	Y2019	VA59	Ames 19016	nss	LN	N	sp2	spb3	2081	2	0	81	rep2	23	20	19	16	21	13	26	10	16	39	33	31	13	16	26	19	10	21	17	11	14	0	21	12	15	15	0	22	15	15	0	0	0	0	0
HAV_5703	HAV_5703_S122_R1_001.fastq.gz	Y2019	VA59	Ames 19016	nss	LN	N	sp2	spb3	2081	2	0	81	rep3	18	14	10	16	20	12	11	15	20	59	36	41	16	16	14	0	0	0	11	12	0	0	0	0	0	15	0	0	14	14	0	0	0	0	0
HAV_5704	HAV_5704_S130_R1_001.fastq.gz	Y2019	P39	Ames 28186	sweet	LN	N	sp2	spb3	2083	2	0	83	rep1	17	0	11	7	9	13	13	11	15	7	9	5	10	12	12	0	0	18	0	0	9	13	0	0	18	34	0	15	0	12	0	0	0	0	0
HAV_5705	HAV_5705_S75_R1_001.fastq.gz	Y2019	P39	Ames 28186	sweet	LN	N	sp2	spb3	2083	2	0	83	rep2	16	0	11	26	30	0	28	13	10	0	0	0	0	0	40	0	0	0	0	0	0	0	0	0	0	0	0	0	0	0	88	52	47	23	63
HAV_5706	HAV_5706_S83_R1_001.fastq.gz	Y2019	P39	Ames 28186	sweet	LN	N	sp2	spb3	2083	2	0	83	rep3	11	8	8	2	10	6	9	3	5	178	146	132	8	6	8	0	0	0	0	0	0	0	0	0	0	0	0	0	0	0	0	0	0	0	0
HAV_5707	HAV_5707_S91_R1_001.fastq.gz	Y2019	A635	Ames 19309	ss	LN	N	sp1	spb1	2101	2	1	01	rep1	45	27	32	16	42	39	32	21	43	59	37	32	28	20	39	0	0	0	0	0	0	0	0	0	0	0	0	0	0	0	0	0	0	0	0
HAV_5708	HAV_5708_S99_R1_001.fastq.gz	Y2019	A635	Ames 19309	ss	LN	N	sp1	spb1	2101	2	1	01	rep2	26	15	15	18	15	18	8	19	23	14	10	8	14	10	18	22	0	14	0	16	8	8	0	11	14	8	0	9	0	11	0	0	0	0	0
HAV_5709	HAV_5709_S39_R1_001.fastq.gz	Y2019	A635	Ames 19309	ss	LN	N	sp1	spb1	2101	2	1	01	rep3	35	22	23	28	31	19	23	36	26	8	8	9	16	19	27	0	0	0	0	0	0	0	0	0	0	0	0	0	0	0	0	0	0	0	0
HAV_5710	HAV_5710_S115_R1_001.fastq.gz	Y2019	CI31A	Ames 21512	nss	LN	N	sp1	spb1	2103	2	1	03	rep1	43	20	13	12	16	24	19	13	20	35	21	29	25	12	32	0	0	0	0	0	0	0	0	0	17	0	0	0	0	0	22	20	26	16	0
HAV_5711	HAV_5711_S123_R1_001.fastq.gz	Y2019	CI31A	Ames 21512	nss	LN	N	sp1	spb1	2103	2	1	03	rep2	37	27	28	20	29	22	11	15	22	215	180	178	23	18	22	26	21	26	24	16	23	9	22	15	22	19	16	28	32	28	15	0	0	0	0
HAV_5712	HAV_5712_S131_R1_001.fastq.gz	Y2019	CI31A	Ames 21512	nss	LN	N	sp1	spb1	2103	2	1	03	rep3	61	24	32	19	32	36	26	30	30	89	80	82	32	21	35	16	0	25	10	12	10	0	0	0	31	26	15	0	13	18	0	0	0	0	0
HAV_5713	HAV_5713_S76_R1_001.fastq.gz	Y2019	Check_B73xMo17			LN	N	sp1	spb1	2106	2	1	06	rep1	27	15	18	15	15	26	15	27	20	0	0	0	18	22	24	0	0	0	0	0	0	0	0	0	0	0	0	0	0	0	0	0	0	0	0
HAV_5714	HAV_5714_S84_R1_001.fastq.gz	Y2019	Check_B73xMo17			LN	N	sp1	spb1	2106	2	1	06	rep2	0	0	0	20	0	0	0	0	14	0	0	0	48	0	49	0	0	0	0	0	0	0	0	0	0	0	0	0	0	0	0	0	0	0	0
HAV_5715	HAV_5715_S92_R1_001.fastq.gz	Y2019	Check_B73xMo17			LN	N	sp1	spb1	2106	2	1	06	rep3	45	32	31	22	29	42	35	38	34	6	6	6	31	37	49	0	0	0	0	0	0	0	0	0	0	0	0	0	0	10	0	0	0	0	0
HAV_5716	HAV_5716_S40_R1_001.fastq.gz	Y2019	B105	PI 594048	mixed	LN	N	sp1	spb1	2108	2	1	08	rep1	0	13	0	0	34	11	3	27	0	0	8	0	0	0	24	0	0	9	0	0	0	0	0	0	0	7	0	0	0	0	52	0	0	0	0
HAV_5717	HAV_5717_S108_R1_001.fastq.gz	Y2019	B105	PI 594048	mixed	LN	N	sp1	spb1	2108	2	1	08	rep2	0	0	0	0	0	11	0	0	0	0	0	0	0	0	15	0	0	0	0	0	0	0	0	0	0	0	0	0	0	0	58	0	0	0	0
HAV_5718	HAV_5718_S116_R1_001.fastq.gz	Y2019	B105	PI 594048	mixed	LN	N	sp1	spb1	2108	2	1	08	rep3	24	0	16	17	17	11	11	0	10	0	0	0	9	0	14	0	0	42	0	17	17	0	29	0	0	0	0	16	0	12	52	17	30	17	21
HAV_5719	HAV_5719_S124_R1_001.fastq.gz	Y2019	CI187-2	Ames 26138	nss	LN	N	sp1	spb1	2110	2	1	10	rep1	7	6	8	7	6	3	4	4	5	65	52	30	3	6	5	0	0	0	0	0	0	0	0	0	0	11	0	0	0	0	0	0	0	0	0
HAV_5720	HAV_5720_S132_R1_001.fastq.gz	Y2019	CI187-2	Ames 26138	nss	LN	N	sp1	spb1	2110	2	1	10	rep2	33	19	20	18	22	26	15	21	37	96	59	85	23	16	24	0	0	0	0	0	0	0	0	0	0	0	0	0	0	0	0	0	0	0	0
HAV_5721	HAV_5721_S1_R1_001.fastq.gz	Y2019	CI187-2	Ames 26138	nss	LN	N	sp1	spb1	2110	2	1	10	rep3	169	90	118	81	102	119	91	105	117	56	26	32	96	79	138	0	0	0	0	0	0	0	0	0	0	0	0	0	0	0	27	18	34	16	16
HAV_5722	HAV_5722_S10_R1_001.fastq.gz	Y2019	CML220	Ames 27087	ts	LN	N	sp1	spb1	2111	2	1	11	rep1	25	17	12	10	14	12	7	3	21	170	135	129	18	18	16	0	0	0	0	0	0	0	0	0	0	0	0	0	0	0	38	0	0	0	0
HAV_5723	HAV_5723_S19_R1_001.fastq.gz	Y2019	CML220	Ames 27087	ts	LN	N	sp1	spb1	2111	2	1	11	rep2	93	47	72	52	71	59	48	58	61	0	0	0	47	42	75	5	0	17	8	0	0	0	0	0	10	12	0	7	0	9	0	0	0	0	0
HAV_5724	HAV_5724_S28_R1_001.fastq.gz	Y2019	CML220	Ames 27087	ts	LN	N	sp1	spb1	2111	2	1	11	rep3	12	5	6	7	8	4	3	11	9	90	53	66	9	8	21	0	0	0	0	0	0	0	0	0	0	0	0	0	0	0	0	0	0	0	0
HAV_5725	HAV_5725_S37_R1_001.fastq.gz	Y2019	CML323	Ames 27097	mixed	LN	N	sp1	spb1	2114	2	1	14	rep1	7	0	5	9	5	8	8	7	8	15	12	9	2	9	5	0	0	0	0	0	0	0	0	0	0	0	0	0	0	0	0	0	0	0	0
HAV_5726	HAV_5726_S44_R1_001.fastq.gz	Y2019	CML323	Ames 27097	mixed	LN	N	sp1	spb1	2114	2	1	14	rep2	12	10	7	11	11	11	8	4	10	57	28	34	3	8	13	0	0	0	0	0	0	0	0	0	0	0	0	0	0	0	0	0	0	0	0
HAV_5727	HAV_5727_S51_R1_001.fastq.gz	Y2019	CML323	Ames 27097	mixed	LN	N	sp1	spb1	2114	2	1	14	rep3	101	61	67	62	63	74	68	66	81	27	21	20	52	66	95	0	0	0	0	0	0	0	0	0	0	0	0	0	0	0	0	0	0	0	0
HAV_5728	HAV_5728_S59_R1_001.fastq.gz	Y2019	NC290A	Ames 27141	nss	LN	N	sp1	spb2	2116	2	1	16	rep1	70	42	45	22	51	52	30	37	45	235	179	203	37	33	54	0	0	0	0	0	0	0	0	0	0	0	0	0	0	0	0	0	0	0	0
HAV_5729	HAV_5729_S2_R1_001.fastq.gz	Y2019	NC290A	Ames 27141	nss	LN	N	sp1	spb2	2116	2	1	16	rep2	4	5	12	8	6	6	4	4	4	57	68	66	7	5	4	0	0	0	0	0	0	0	0	0	0	0	0	0	0	0	0	0	60	0	0
HAV_5730	HAV_5730_S11_R1_001.fastq.gz	Y2019	NC290A	Ames 27141	nss	LN	N	sp1	spb2	2116	2	1	16	rep3	35	16	15	8	12	14	10	6	15	111	95	116	17	9	17	0	0	0	0	0	0	0	0	0	0	0	0	0	0	0	0	0	0	0	0
HAV_5731	HAV_5731_S20_R1_001.fastq.gz	Y2019	N6	Ames 27137	nss	LN	N	sp1	spb2	2118	2	1	18	rep1	148	68	80	66	99	101	71	61	96	0	0	0	72	59	120	0	0	0	0	0	0	0	0	0	0	0	0	0	0	0	0	0	0	0	19
HAV_5732	HAV_5732_S29_R1_001.fastq.gz	Y2019	N6	Ames 27137	nss	LN	N	sp1	spb2	2118	2	1	18	rep2	92	47	56	43	65	53	51	37	62	0	0	0	45	50	61	0	0	0	0	0	0	0	0	0	0	0	0	0	0	0	46	26	33	15	25
HAV_5733	HAV_5733_S38_R1_001.fastq.gz	Y2019	N6	Ames 27137	nss	LN	N	sp1	spb2	2118	2	1	18	rep3	131	80	92	63	85	74	72	66	87	5	10	5	76	58	121	0	0	0	0	0	0	0	0	0	0	0	0	0	0	0	0	0	40	0	0
HAV_5734	HAV_5734_S45_R1_001.fastq.gz	Y2019	Check_B73xMo17			LN	N	sp1	spb2	2119	2	1	19	rep1	22	14	17	0	42	15	23	0	20	0	0	0	14	22	14	0	0	0	0	0	0	0	0	0	0	0	0	0	0	0	47	0	0	0	0
HAV_5735	HAV_5735_S52_R1_001.fastq.gz	Y2019	Check_B73xMo17			LN	N	sp1	spb2	2119	2	1	19	rep2	88	50	57	44	53	61	53	51	58	13	6	6	54	37	66	0	0	0	0	0	0	0	0	0	0	0	0	0	0	0	0	0	0	0	0
HAV_5736	HAV_5736_S60_R1_001.fastq.gz	Y2019	Check_B73xMo17			LN	N	sp1	spb2	2119	2	1	19	rep3	96	54	58	28	59	73	64	55	71	0	0	0	59	47	85	0	0	0	0	0	0	0	0	0	0	0	0	0	0	0	114	53	83	38	64
HAV_5737	HAV_5737_S3_R1_001.fastq.gz	Y2019	NC356	Ames 27174	ts	LN	N	sp1	spb2	2121	2	1	21	rep1	106	64	66	36	67	69	52	45	52	5	2	5	55	45	60	0	0	0	0	0	0	0	0	0	0	0	0	0	0	0	0	0	0	0	0
HAV_5738	HAV_5738_S12_R1_001.fastq.gz	Y2019	NC356	Ames 27174	ts	LN	N	sp1	spb2	2121	2	1	21	rep2	26	11	26	23	12	30	25	14	30	0	0	0	25	20	22	0	0	0	0	0	0	0	0	0	0	0	0	0	0	0	0	0	0	0	0
HAV_5739	HAV_5739_S21_R1_001.fastq.gz	Y2019	NC356	Ames 27174	ts	LN	N	sp1	spb2	2121	2	1	21	rep3	147	84	118	67	124	95	91	75	113	27	20	18	90	48	112	0	0	0	0	0	0	0	0	0	0	0	0	0	0	9	0	0	0	0	0
HAV_5740	HAV_5740_S30_R1_001.fastq.gz	Y2019	NC264	PI 520774	ts	LN	N	sp1	spb2	2123	2	1	23	rep1	74	52	52	40	47	53	48	47	64	12	12	14	51	37	69	0	0	0	0	0	0	0	0	0	0	0	0	0	0	0	0	0	0	0	0
HAV_5741	HAV_5741_S39_R1_001.fastq.gz	Y2019	NC264	PI 520774	ts	LN	N	sp1	spb2	2123	2	1	23	rep2	34	19	27	12	13	12	19	15	20	55	35	48	13	13	28	0	0	0	0	0	0	0	0	0	0	0	0	0	0	0	61	0	0	0	0
HAV_5742	HAV_5742_S46_R1_001.fastq.gz	Y2019	NC264	PI 520774	ts	LN	N	sp1	spb2	2123	2	1	23	rep3	10	0	5	6	10	9	9	3	5	22	17	23	2	7	4	0	0	0	0	0	0	0	0	0	0	0	0	0	0	0	56	37	33	31	31
HAV_5743	HAV_5743_S53_R1_001.fastq.gz	Y2019	NC324	Ames 27158	ss	LN	N	sp1	spb2	2126	2	1	26	rep1	38	29	31	28	35	30	28	22	43	129	97	86	26	33	39	16	17	16	13	0	0	14	18	0	11	12	9	22	0	21	0	0	0	0	0
HAV_5744	HAV_5744_S61_R1_001.fastq.gz	Y2019	NC324	Ames 27158	ss	LN	N	sp1	spb2	2126	2	1	26	rep2	54	32	46	40	56	49	48	39	51	0	0	0	48	26	71	0	0	0	0	0	0	0	0	0	0	0	0	0	0	0	118	46	66	47	64
HAV_5745	HAV_5745_S8_R1_001.fastq.gz	Y2019	NC324	Ames 27158	ss	LN	N	sp1	spb2	2126	2	1	26	rep3	121	53	60	65	81	57	47	54	79	0	0	0	46	46	71	0	0	0	0	0	0	0	0	0	0	0	0	0	0	0	47	0	0	0	0
HAV_5746	HAV_5746_S17_R1_001.fastq.gz	Y2019	N7A	Ames 28366	mixed	LN	N	sp1	spb2	2128	2	1	28	rep1	41	24	24	19	34	27	21	31	33	17	21	21	17	17	51	0	0	0	0	0	0	0	0	0	0	0	0	0	0	0	0	0	0	0	0
HAV_5747	HAV_5747_S26_R1_001.fastq.gz	Y2019	N7A	Ames 28366	mixed	LN	N	sp1	spb2	2128	2	1	28	rep2	35	20	23	19	17	16	16	19	15	151	126	93	16	16	32	0	0	0	0	0	0	0	0	0	0	0	0	0	0	0	0	33	0	0	0
HAV_5748	HAV_5748_S35_R1_001.fastq.gz	Y2019	N7A	Ames 28366	mixed	LN	N	sp1	spb2	2128	2	1	28	rep3	58	23	36	35	45	53	39	31	50	12	6	10	42	32	60	0	0	0	0	0	0	0	0	0	0	0	0	0	0	0	0	0	0	0	0
HAV_5749	HAV_5749_S43_R1_001.fastq.gz	Y2019	T234	Ames 27190	nss	LN	N	sp1	spb3	2130	2	1	30	rep1	37	15	18	11	18	28	17	15	25	104	84	47	15	21	28	0	0	0	0	0	0	0	0	0	0	0	0	0	0	0	0	0	0	0	0
HAV_5750	HAV_5750_S50_R1_001.fastq.gz	Y2019	T234	Ames 27190	nss	LN	N	sp1	spb3	2130	2	1	30	rep2	8	0	3	3	7	3	6	7	8	23	10	19	4	8	10	0	0	0	0	0	0	0	0	0	0	0	0	0	0	0	50	27	33	14	25
HAV_5751	HAV_5751_S58_R1_001.fastq.gz	Y2019	T234	Ames 27190	nss	LN	N	sp1	spb3	2130	2	1	30	rep3	34	17	21	20	24	20	25	21	25	125	71	95	13	15	25	6	8	0	13	0	0	0	0	0	11	15	15	20	16	12	0	0	0	0	0
HAV_5752	HAV_5752_S66_R1_001.fastq.gz	Y2019	NC370	Ames 27181	ts	LN	N	sp1	spb3	2132	2	1	32	rep1	28	18	19	12	14	0	8	20	30	3	4	2	9	12	25	0	0	0	0	0	0	0	0	0	0	0	0	0	0	0	0	0	0	0	0
HAV_5753	HAV_5753_S4_R1_001.fastq.gz	Y2019	NC370	Ames 27181	ts	LN	N	sp1	spb3	2132	2	1	32	rep2	18	8	15	7	36	0	10	14	15	8	4	0	0	12	24	0	0	0	0	0	0	0	0	0	0	0	0	0	0	0	0	0	0	0	0
HAV_5754	HAV_5754_S13_R1_001.fastq.gz	Y2019	NC370	Ames 27181	ts	LN	N	sp1	spb3	2132	2	1	32	rep3	41	21	29	14	30	27	23	26	34	37	16	17	24	18	46	0	0	0	0	0	0	0	0	0	0	0	0	0	0	0	0	0	0	0	0
HAV_5755	HAV_5755_S22_R1_001.fastq.gz	Y2019	VAW6	Ames 19000	mixed	LN	N	sp1	spb3	2133	2	1	33	rep1	70	45	39	32	39	45	35	32	56	11	8	8	37	38	54	0	0	0	0	0	0	0	0	0	0	0	0	0	0	0	0	0	0	0	0
HAV_5756	HAV_5756_S31_R1_001.fastq.gz	Y2019	VAW6	Ames 19000	mixed	LN	N	sp1	spb3	2133	2	1	33	rep2	121	70	88	90	95	100	74	72	103	21	11	19	64	76	110	0	0	0	0	0	0	0	0	0	0	0	0	0	0	0	0	0	38	0	0
HAV_5759	HAV_5759_S54_R1_001.fastq.gz	Y2019	VA102	PI 587151	nss	LN	N	sp1	spb3	2136	2	1	36	rep2	213	129	150	104	140	173	147	122	170	9	14	9	107	97	173	0	0	0	0	0	0	0	0	0	0	0	0	0	0	0	0	0	0	0	0
HAV_5760	HAV_5760_S62_R1_001.fastq.gz	Y2019	VA102	PI 587151	nss	LN	N	sp1	spb3	2136	2	1	36	rep3	68	33	36	29	52	38	47	35	34	3	8	2	34	29	45	0	0	0	0	0	0	0	0	0	0	0	0	0	0	0	0	0	0	0	0
HAV_5761	HAV_5761_S5_R1_001.fastq.gz	Y2019	SC357	NSL 53094	mixed	LN	N	sp1	spb3	2138	2	1	38	rep1	123	60	44	49	57	73	39	48	69	9	8	7	51	50	63	0	0	0	0	0	0	0	0	0	0	0	0	0	0	0	0	0	0	0	0
HAV_5762	HAV_5762_S14_R1_001.fastq.gz	Y2019	SC357	NSL 53094	mixed	LN	N	sp1	spb3	2138	2	1	38	rep2	60	34	39	26	36	40	35	37	48	31	21	24	29	36	41	12	0	0	0	14	0	0	0	0	13	12	0	12	0	14	39	0	0	0	0
HAV_5763	HAV_5763_S23_R1_001.fastq.gz	Y2019	SC357	NSL 53094	mixed	LN	N	sp1	spb3	2138	2	1	38	rep3	64	48	47	29	47	51	42	34	58	6	5	5	29	37	55	0	0	0	0	0	0	0	0	0	0	0	0	0	0	0	0	0	0	0	0
HAV_5764	HAV_5764_S32_R1_001.fastq.gz	Y2019	NC360	Ames 27176	mixed	LN	N	sp1	spb3	2139	2	1	39	rep1	418	240	286	211	274	328	255	215	250	17	11	9	233	203	319	0	0	0	0	0	0	0	0	0	0	0	0	0	0	0	0	0	0	0	0
HAV_5765	HAV_5765_S40_R1_001.fastq.gz	Y2019	NC360	Ames 27176	mixed	LN	N	sp1	spb3	2139	2	1	39	rep2	296	156	184	154	195	185	148	146	208	28	15	16	162	164	235	0	0	0	0	0	0	0	0	0	0	0	0	0	0	0	0	0	50	0	0
HAV_5766	HAV_5766_S47_R1_001.fastq.gz	Y2019	NC360	Ames 27176	mixed	LN	N	sp1	spb3	2139	2	1	39	rep3	30	19	20	20	17	17	13	14	18	49	39	38	18	18	31	0	0	0	0	0	0	0	0	0	0	0	0	0	0	0	0	0	0	0	0
HAV_5767	HAV_5767_S55_R1_001.fastq.gz	Y2019	W64A	PI 587152	nss	LN	N	sp1	spb3	2142	2	1	42	rep1	42	34	38	34	41	33	39	21	47	471	353	359	36	38	39	21	0	20	27	20	16	15	16	0	18	24	16	15	18	26	49	0	0	0	0
HAV_5768	HAV_5768_S63_R1_001.fastq.gz	Y2019	W64A	PI 587152	nss	LN	N	sp1	spb3	2142	2	1	42	rep2	59	41	43	40	55	50	40	37	57	269	190	205	17	36	47	13	13	15	15	0	20	0	13	0	22	15	14	29	18	25	0	0	0	0	0
HAV_5769	HAV_5769_S6_R1_001.fastq.gz	Y2019	W64A	PI 587152	nss	LN	N	sp1	spb3	2142	2	1	42	rep3	26	16	17	5	12	11	20	11	11	105	70	59	10	9	22	0	0	0	0	0	0	0	0	0	0	0	0	0	0	0	0	0	0	0	0
HAV_5770	HAV_5770_S15_R1_001.fastq.gz	Y2019	A188	Ames 22443	nss	LN	N	sp2	spb1	2144	2	1	44	rep1	84	39	45	38	46	42	41	38	53	16	13	15	38	42	55	0	0	0	0	0	0	0	0	0	0	0	0	0	0	0	89	43	60	34	35
HAV_5771	HAV_5771_S24_R1_001.fastq.gz	Y2019	A188	Ames 22443	nss	LN	N	sp2	spb1	2144	2	1	44	rep2	137	74	69	80	110	81	91	74	81	55	45	50	68	73	108	0	0	0	0	0	0	0	0	0	0	0	0	0	0	0	42	30	37	17	28
HAV_5772	HAV_5772_S41_R1_001.fastq.gz	Y2019	A188	Ames 22443	nss	LN	N	sp2	spb1	2144	2	1	44	rep3	4	8	5	2	4	6	3	5	4	57	36	45	1	4	6	0	0	0	0	0	0	0	0	0	12	0	0	0	0	0	69	21	26	22	21
HAV_5775	HAV_5775_S56_R1_001.fastq.gz	Y2019	C123	Ames 19313	nss	LN	N	sp2	spb1	2145	2	1	45	rep3	14	13	11	6	5	8	6	15	12	47	31	21	12	11	10	0	0	0	0	0	0	0	0	0	0	0	0	0	0	0	95	63	65	44	62
HAV_5776	HAV_5776_S64_R1_001.fastq.gz	Y2019	B75	PI 608774	nss	LN	N	sp2	spb1	2147	2	1	47	rep1	46	36	33	41	37	29	25	30	33	195	149	140	32	29	34	13	0	19	8	0	12	0	0	0	0	0	14	16	0	15	0	0	0	0	0
HAV_5777	HAV_5777_S7_R1_001.fastq.gz	Y2019	B75	PI 608774	nss	LN	N	sp2	spb1	2147	2	1	47	rep2	127	68	74	62	76	76	67	58	76	26	29	29	64	58	75	0	0	0	0	0	0	0	0	0	0	0	0	0	0	0	0	0	0	0	0
HAV_5778	HAV_5778_S16_R1_001.fastq.gz	Y2019	B75	PI 608774	nss	LN	N	sp2	spb1	2147	2	1	47	rep3	33	12	34	28	21	20	20	17	15	86	82	72	22	21	23	0	0	0	0	0	0	0	0	0	0	0	0	0	0	0	62	0	0	0	0
HAV_5779	HAV_5779_S25_R1_001.fastq.gz	Y2019	A661	PI 607521	nss	LN	N	sp2	spb1	2150	2	1	50	rep1	10	4	9	4	8	8	3	8	13	37	27	31	11	8	10	0	0	0	0	0	0	0	0	0	0	0	0	0	0	0	75	33	47	26	32
HAV_5780	HAV_5780_S44_R1_001.fastq.gz	Y2019	A661	PI 607521	nss	LN	N	sp2	spb1	2150	2	1	50	rep2	4	5	7	5	2	6	6	2	4	49	22	37	5	4	8	0	0	0	0	0	0	0	0	0	0	0	0	0	0	0	0	0	19	0	0
HAV_5781	HAV_5781_S45_R1_001.fastq.gz	Y2019	A661	PI 607521	nss	LN	N	sp2	spb1	2150	2	1	50	rep3	32	21	26	23	37	24	30	32	29	170	133	138	24	14	32	0	0	0	0	0	0	0	0	0	0	0	0	0	0	0	32	0	0	0	0
HAV_5782	HAV_5782_S49_R1_001.fastq.gz	Y2019	A619	PI 587139	nss	LN	N	sp2	spb1	2151	2	1	51	rep1	8	0	7	0	5	7	1	0	14	30	0	0	0	1	6	0	0	0	0	0	0	0	0	0	0	0	0	0	0	0	74	0	0	0	0
HAV_5783	HAV_5783_S57_R1_001.fastq.gz	Y2019	A619	PI 587139	nss	LN	N	sp2	spb1	2151	2	1	51	rep2	24	17	22	17	20	34	15	19	23	35	22	26	21	22	32	0	0	0	0	0	0	0	0	0	0	0	0	0	0	0	58	30	40	17	25
HAV_5784	HAV_5784_S65_R1_001.fastq.gz	Y2019	A619	PI 587139	nss	LN	N	sp2	spb1	2151	2	1	51	rep3	55	28	23	17	34	28	20	15	40	81	78	70	23	14	21	0	0	0	0	0	0	0	0	0	0	0	0	0	0	0	31	0	0	13	0
HAV_5785	HAV_5785_S67_R1_001.fastq.gz	Y2019	B103	PI 594046	nss	LN	N	sp2	spb1	2153	2	1	53	rep1	81	44	51	39	59	38	44	34	52	6	6	6	23	32	58	0	0	0	0	0	0	0	0	0	0	0	0	0	0	0	19	0	41	0	14
HAV_5786	HAV_5786_S75_R1_001.fastq.gz	Y2019	B103	PI 594046	nss	LN	N	sp2	spb1	2153	2	1	53	rep2	50	36	32	28	46	40	37	32	53	0	0	0	37	30	38	0	0	0	0	0	0	0	0	0	0	0	0	0	0	0	41	0	27	0	0
HAV_5787	HAV_5787_S83_R1_001.fastq.gz	Y2019	B103	PI 594046	nss	LN	N	sp2	spb1	2153	2	1	53	rep3	71	51	52	50	51	52	49	51	58	89	67	58	33	34	73	0	0	0	0	0	0	0	0	0	0	0	0	0	0	0	0	0	0	0	0
HAV_5788	HAV_5788_S46_R1_001.fastq.gz	Y2019	CH9	Ames 27068	nss	LN	N	sp2	spb1	2156	2	1	56	rep1	10	7	6	5	12	7	5	7	9	40	31	45	6	9	11	0	0	0	0	0	0	0	0	0	0	0	0	0	0	0	0	0	0	0	0
HAV_5789	HAV_5789_S47_R1_001.fastq.gz	Y2019	CH9	Ames 27068	nss	LN	N	sp2	spb1	2156	2	1	56	rep2	27	21	20	11	17	18	7	19	15	103	66	69	17	23	17	0	0	0	0	0	0	0	0	0	0	0	0	0	0	0	47	0	0	0	0
HAV_5790	HAV_5790_S107_R1_001.fastq.gz	Y2019	CH9	Ames 27068	nss	LN	N	sp2	spb1	2156	2	1	56	rep3	22	14	11	10	13	22	15	12	16	141	100	91	19	8	16	0	0	0	0	0	0	0	0	0	0	0	0	0	0	0	0	0	0	0	0
HAV_5791	HAV_5791_S115_R1_001.fastq.gz	Y2019	Check_B73xMo17			LN	N	sp2	spb2	2157	2	1	57	rep1	38	20	34	17	18	16	13	33	16	4	10	4	20	22	36	6	10	19	14	23	15	13	9	0	20	9	21	14	10	28	0	0	0	0	0
HAV_5792	HAV_5792_S123_R1_001.fastq.gz	Y2019	Check_B73xMo17			LN	N	sp2	spb2	2157	2	1	57	rep2	77	37	32	22	53	43	29	37	33	6	7	4	27	41	62	15	14	22	14	12	11	6	20	7	22	22	12	26	17	28	0	0	0	0	0
HAV_5793	HAV_5793_S68_R1_001.fastq.gz	Y2019	Check_B73xMo17			LN	N	sp2	spb2	2157	2	1	57	rep3	110	38	76	68	79	70	54	73	75	26	31	20	68	70	97	0	0	0	0	0	0	0	0	0	0	0	0	0	0	0	0	0	0	0	0
HAV_5794	HAV_5794_S76_R1_001.fastq.gz	Y2019	MT42	Ames 20140	mixed	LN	N	sp2	spb2	2159	2	1	59	rep1	258	134	134	123	160	131	123	117	155	0	0	0	112	125	192	0	0	0	0	0	0	0	0	0	0	0	0	0	0	0	181	96	124	78	84
HAV_5795	HAV_5795_S84_R1_001.fastq.gz	Y2019	MT42	Ames 20140	mixed	LN	N	sp2	spb2	2159	2	1	59	rep2	136	70	100	89	103	119	84	79	97	0	0	0	86	72	126	0	0	0	0	0	0	0	0	0	0	0	0	0	0	0	0	0	0	0	0
HAV_5796	HAV_5796_S48_R1_001.fastq.gz	Y2019	MT42	Ames 20140	mixed	LN	N	sp2	spb2	2159	2	1	59	rep3	115	67	71	59	84	79	70	81	90	0	0	0	56	79	94	0	0	0	0	0	0	0	0	0	0	0	0	0	0	0	79	43	58	27	37
HAV_5797	HAV_5797_S49_R1_001.fastq.gz	Y2019	H99	PI 587129	nss	LN	N	sp2	spb2	2162	2	1	62	rep1	44	17	40	14	22	36	28	19	29	79	55	70	25	17	25	20	18	36	17	31	25	22	28	9	22	30	26	24	26	31	0	0	0	0	0
HAV_5798	HAV_5798_S108_R1_001.fastq.gz	Y2019	H99	PI 587129	nss	LN	N	sp2	spb2	2162	2	1	62	rep2	47	29	30	19	28	33	24	29	36	125	95	82	19	28	34	0	0	14	0	0	0	0	0	0	15	0	0	0	0	18	33	13	14	0	0
HAV_5799	HAV_5799_S116_R1_001.fastq.gz	Y2019	H99	PI 587129	nss	LN	N	sp2	spb2	2162	2	1	62	rep3	149	80	90	70	115	121	90	94	113	14	9	11	82	95	118	0	0	12	0	0	0	0	0	0	15	0	0	12	0	0	0	0	0	0	0
HAV_5800	HAV_5800_S124_R1_001.fastq.gz	Y2019	MEF156-55-2	Ames 27135	nss	LN	N	sp2	spb2	2163	2	1	63	rep1	67	26	41	35	42	41	36	41	40	28	15	26	31	35	40	0	0	0	0	0	0	0	0	0	0	0	0	0	0	0	29	0	21	0	0
HAV_5801	HAV_5801_S69_R1_001.fastq.gz	Y2019	MEF156-55-2	Ames 27135	nss	LN	N	sp2	spb2	2163	2	1	63	rep2	32	28	33	17	21	21	21	15	25	34	37	36	25	23	26	0	0	0	0	0	0	0	0	0	0	0	0	0	0	0	50	20	19	13	0
HAV_5802	HAV_5802_S77_R1_001.fastq.gz	Y2019	MEF156-55-2	Ames 27135	nss	LN	N	sp2	spb2	2163	2	1	63	rep3	22	12	7	9	10	13	9	12	12	147	145	89	7	9	16	0	0	0	0	0	0	0	0	0	0	0	0	0	0	0	0	0	33	0	0
HAV_5803	HAV_5803_S85_R1_001.fastq.gz	Y2019	CM37	Ames 20190	nss	LN	N	sp2	spb2	2165	2	1	65	rep1	91	46	42	34	38	58	42	43	56	64	35	36	46	38	44	9	0	13	0	12	11	0	10	0	8	8	0	11	0	13	15	20	23	0	0
HAV_5804	HAV_5804_S50_R1_001.fastq.gz	Y2019	CM37	Ames 20190	nss	LN	N	sp2	spb2	2165	2	1	65	rep2	186	80	113	88	103	133	87	92	132	7	8	13	85	75	102	0	0	0	0	0	0	0	0	0	0	0	0	0	0	10	14	0	50	0	11
HAV_5805	HAV_5805_S101_R1_001.fastq.gz	Y2019	CM37	Ames 20190	nss	LN	N	sp2	spb2	2165	2	1	65	rep3	32	17	17	12	24	23	15	17	19	7	3	3	19	19	42	0	0	0	0	0	0	0	0	0	0	0	0	0	0	0	0	0	0	0	0
HAV_5806	HAV_5806_S109_R1_001.fastq.gz	Y2019	MO47	PI 583352	mixed	LN	N	sp2	spb2	2167	2	1	67	rep1	9	4	9	6	8	8	3	8	5	80	59	54	5	4	6	0	0	0	0	0	0	0	0	0	0	0	0	0	0	0	0	0	0	0	0
HAV_5807	HAV_5807_S117_R1_001.fastq.gz	Y2019	MO47	PI 583352	mixed	LN	N	sp2	spb2	2167	2	1	67	rep2	13	6	7	4	3	13	7	2	13	26	21	22	9	8	10	0	0	0	0	0	0	0	0	0	0	0	0	0	0	0	48	19	35	14	29
HAV_5808	HAV_5808_S125_R1_001.fastq.gz	Y2019	MO47	PI 583352	mixed	LN	N	sp2	spb2	2167	2	1	67	rep3	23	10	19	13	19	23	9	17	18	99	78	76	12	17	23	0	0	0	0	0	0	0	0	0	0	0	0	0	0	0	0	0	0	0	0
HAV_5809	HAV_5809_S70_R1_001.fastq.gz	Y2019	IA5125	PI 587135	sweet	LN	N	sp2	spb2	2169	2	1	69	rep1	17	15	10	11	17	14	12	10	26	36	36	18	12	4	16	0	0	0	0	0	0	0	0	0	0	0	0	0	0	0	0	0	0	0	0
HAV_5810	HAV_5810_S78_R1_001.fastq.gz	Y2019	IA5125	PI 587135	sweet	LN	N	sp2	spb2	2169	2	1	69	rep2	27	13	22	32	33	23	14	24	19	71	42	51	35	18	32	0	0	0	0	0	0	0	0	0	0	0	0	0	0	0	0	0	0	0	0
HAV_5811	HAV_5811_S86_R1_001.fastq.gz	Y2019	IA5125	PI 587135	sweet	LN	N	sp2	spb2	2169	2	1	69	rep3	50	14	38	0	27	14	13	28	17	1	1	3	22	16	20	0	0	0	0	0	0	0	0	0	0	0	0	0	0	0	15	27	21	0	0
HAV_5812	HAV_5812_S51_R1_001.fastq.gz	Y2019	NC262	PI 531085	nss	LN	N	sp2	spb3	2172	2	1	72	rep1	76	46	46	30	53	65	57	53	57	361	259	265	55	49	55	21	14	29	20	18	11	9	13	0	22	24	13	13	8	26	0	0	0	0	0
HAV_5813	HAV_5813_S102_R1_001.fastq.gz	Y2019	NC262	PI 531085	nss	LN	N	sp2	spb3	2172	2	1	72	rep2	86	60	71	58	83	86	58	72	88	126	77	92	53	55	90	0	0	11	0	14	0	0	0	0	8	0	0	0	0	0	0	0	0	0	0
HAV_5814	HAV_5814_S110_R1_001.fastq.gz	Y2019	NC262	PI 531085	nss	LN	N	sp2	spb3	2172	2	1	72	rep3	294	144	192	157	235	221	161	159	230	120	99	96	164	157	248	0	0	0	0	0	0	0	0	0	0	0	0	0	0	0	0	61	0	0	0
HAV_5815	HAV_5815_S118_R1_001.fastq.gz	Y2019	Check_B73xMo17			LN	N	sp2	spb3	2174	2	1	74	rep1	164	108	110	83	128	112	110	85	123	27	23	18	83	101	135	0	0	0	0	0	0	0	0	0	0	0	0	0	0	0	0	0	0	0	0
HAV_5816	HAV_5816_S126_R1_001.fastq.gz	Y2019	Check_B73xMo17			LN	N	sp2	spb3	2174	2	1	74	rep2	110	61	65	67	90	64	74	56	101	20	25	15	50	70	76	0	0	0	0	0	0	0	0	0	0	0	0	0	0	0	0	0	0	0	0
HAV_5817	HAV_5817_S52_R1_001.fastq.gz	Y2019	Check_B73xMo17			LN	N	sp2	spb3	2174	2	1	74	rep3	117	56	62	57	69	56	43	50	57	10	6	15	46	52	75	0	0	0	0	0	0	0	0	0	0	0	0	0	0	0	76	62	55	26	45
HAV_5818	HAV_5818_S79_R1_001.fastq.gz	Y2019	NC330	Ames 27161	ss	LN	N	sp2	spb3	2175	2	1	75	rep1	78	36	44	40	60	47	37	35	59	11	1	2	53	31	39	0	0	0	0	0	0	0	0	0	0	0	0	0	0	0	0	0	0	0	0
HAV_5819	HAV_5819_S87_R1_001.fastq.gz	Y2019	NC330	Ames 27161	ss	LN	N	sp2	spb3	2175	2	1	75	rep2	44	14	35	26	28	34	37	25	40	0	0	0	21	37	36	0	0	0	0	0	0	0	0	0	0	0	0	0	0	0	0	0	0	0	0
HAV_5820	HAV_5820_S53_R1_001.fastq.gz	Y2019	NC330	Ames 27161	ss	LN	N	sp2	spb3	2175	2	1	75	rep3	145	87	110	63	106	109	81	96	104	0	0	0	63	68	121	0	0	0	0	0	0	0	0	0	0	0	0	0	0	0	23	30	30	0	31
HAV_5821	HAV_5821_S103_R1_001.fastq.gz	Y2019	MS71	PI 587137	nss	LN	N	sp2	spb3	2178	2	1	78	rep1	50	24	42	22	43	30	28	35	56	7	6	4	35	33	42	0	0	0	0	0	0	0	0	0	0	0	0	0	0	0	0	0	0	0	0
HAV_5822	HAV_5822_S111_R1_001.fastq.gz	Y2019	MS71	PI 587137	nss	LN	N	sp2	spb3	2178	2	1	78	rep2	33	7	25	8	20	17	7	16	15	6	2	7	12	10	14	0	0	0	0	0	0	0	0	0	0	0	0	0	0	0	70	45	69	25	30
HAV_5823	HAV_5823_S119_R1_001.fastq.gz	Y2019	MS71	PI 587137	nss	LN	N	sp2	spb3	2178	2	1	78	rep3	84	52	59	66	73	72	46	41	82	24	22	14	57	59	59	0	0	0	0	0	0	0	0	0	0	0	0	0	0	0	0	0	0	0	0
HAV_5824	HAV_5824_S127_R1_001.fastq.gz	Y2019	NC334	Ames 27163	ts	LN	N	sp2	spb3	2180	2	1	80	rep1	108	36	60	42	47	51	51	48	64	0	0	0	44	24	53	0	0	0	0	0	0	0	0	0	0	0	0	0	0	0	49	0	0	0	0
HAV_5825	HAV_5825_S72_R1_001.fastq.gz	Y2019	NC334	Ames 27163	ts	LN	N	sp2	spb3	2180	2	1	80	rep2	56	28	37	19	28	49	28	25	46	0	0	0	41	31	39	0	0	0	0	0	0	0	0	0	0	0	0	0	0	0	26	0	0	0	0
HAV_5826	HAV_5826_S80_R1_001.fastq.gz	Y2019	NC334	Ames 27163	ts	LN	N	sp2	spb3	2180	2	1	80	rep3	69	45	43	48	49	56	49	46	48	0	0	0	62	29	67	15	7	13	12	17	0	0	0	0	15	11	0	13	15	8	51	0	0	0	0
HAV_5827	HAV_5827_S88_R1_001.fastq.gz	Y2019	NC268	PI 587145	ss	LN	N	sp2	spb3	2181	2	1	81	rep1	58	26	36	28	50	51	37	36	46	16	24	20	35	34	44	0	0	15	5	0	0	0	0	0	0	0	0	11	0	10	72	0	0	0	0
HAV_5828	HAV_5828_S54_R1_001.fastq.gz	Y2019	NC268	PI 587145	ss	LN	N	sp2	spb3	2181	2	1	81	rep2	30	14	30	16	26	22	17	17	15	5	4	6	9	17	23	0	0	0	0	0	0	0	0	0	0	9	0	0	0	0	55	33	34	22	18
HAV_5829	HAV_5829_S104_R1_001.fastq.gz	Y2019	NC268	PI 587145	ss	LN	N	sp2	spb3	2181	2	1	81	rep3	55	38	41	22	43	44	43	37	29	29	18	23	17	40	60	0	0	0	0	0	0	0	0	0	0	0	0	0	0	0	0	0	0	0	0
HAV_5830	HAV_5830_S112_R1_001.fastq.gz	Y2019	N192	PI 550566	ss	LN	N	sp2	spb3	2183	2	1	83	rep1	191	90	133	128	158	155	111	109	154	54	27	38	98	121	166	37	27	32	21	32	18	24	34	16	38	41	28	47	24	37	28	0	0	0	0
HAV_5831	HAV_5831_S120_R1_001.fastq.gz	Y2019	N192	PI 550566	ss	LN	N	sp2	spb3	2183	2	1	83	rep2	83	38	52	37	66	60	53	43	72	14	10	10	44	39	74	22	18	32	17	24	18	14	21	17	28	26	24	43	14	29	0	0	0	0	0
HAV_5832	HAV_5832_S128_R1_001.fastq.gz	Y2019	N192	PI 550566	ss	LN	N	sp2	spb3	2183	2	1	83	rep3	51	52	57	30	43	58	49	37	58	163	121	130	41	34	54	11	0	22	12	0	6	0	12	0	9	15	8	14	9	19	46	44	30	0	25
HAV_5833	HAV_5833_S73_R1_001.fastq.gz	Y2019	CI90C	Ames 22440	mixed	LN	N	sp1	spb1	2201	2	2	01	rep1	33	26	31	17	23	30	17	23	31	27	13	17	17	18	27	0	0	0	0	7	0	0	0	0	0	0	0	0	0	0	39	27	34	20	21
HAV_5834	HAV_5834_S81_R1_001.fastq.gz	Y2019	CI90C	Ames 22440	mixed	LN	N	sp1	spb1	2201	2	2	01	rep2	47	14	24	29	16	20	16	24	24	142	119	113	14	16	43	0	0	0	0	0	0	0	0	0	0	0	0	0	0	0	46	0	46	0	25
HAV_5835	HAV_5835_S89_R1_001.fastq.gz	Y2019	CI90C	Ames 22440	mixed	LN	N	sp1	spb1	2201	2	2	01	rep3	26	18	22	15	33	26	21	18	20	388	291	353	10	12	30	0	0	0	0	0	0	0	0	0	0	0	0	0	0	0	0	0	0	0	0
HAV_5836	HAV_5836_S97_R1_001.fastq.gz	Y2019	H84	PI 587128	mixed	LN	N	sp1	spb1	2204	2	2	04	rep1	59	23	34	25	32	34	29	35	35	14	9	10	30	31	31	0	0	0	0	0	0	0	0	0	13	6	0	0	0	11	0	0	0	0	0
HAV_5837	HAV_5837_S105_R1_001.fastq.gz	Y2019	H84	PI 587128	mixed	LN	N	sp1	spb1	2204	2	2	04	rep2	106	59	53	57	66	69	60	57	71	17	15	16	54	51	63	0	0	0	0	0	0	0	0	0	0	0	0	0	0	0	0	0	0	0	0
HAV_5838	HAV_5838_S113_R1_001.fastq.gz	Y2019	H84	PI 587128	mixed	LN	N	sp1	spb1	2204	2	2	04	rep3	37	20	31	24	28	22	21	21	28	204	137	137	20	18	43	0	0	0	0	0	0	0	0	0	0	0	0	0	0	0	0	0	0	0	0
HAV_5839	HAV_5839_S121_R1_001.fastq.gz	Y2019	B79	PI 608766	mixed	LN	N	sp1	spb1	2206	2	2	06	rep1	39	34	33	22	39	35	34	30	28	6	6	2	34	34	50	13	14	16	8	22	0	12	10	0	19	21	0	19	0	21	0	0	0	0	0
HAV_5840	HAV_5840_S129_R1_001.fastq.gz	Y2019	B79	PI 608766	mixed	LN	N	sp1	spb1	2206	2	2	06	rep2	92	50	55	48	69	83	55	47	73	27	21	23	39	51	68	30	13	17	29	20	21	30	21	7	33	34	16	41	24	35	0	0	0	0	0
HAV_5841	HAV_5841_S74_R1_001.fastq.gz	Y2019	B79	PI 608766	mixed	LN	N	sp1	spb1	2206	2	2	06	rep3	20	0	14	20	28	11	9	18	11	0	0	0	23	7	23	0	0	0	0	0	0	0	0	0	0	0	0	0	0	0	99	57	60	32	46
HAV_5842	HAV_5842_S82_R1_001.fastq.gz	Y2019	F2834T	Ames 27112	mixed	LN	N	sp1	spb1	2207	2	2	07	rep1	125	74	72	63	84	100	73	78	90	0	0	0	68	55	91	0	0	0	0	0	0	0	0	0	0	0	0	0	0	0	0	39	0	0	0
HAV_5843	HAV_5843_S90_R1_001.fastq.gz	Y2019	F2834T	Ames 27112	mixed	LN	N	sp1	spb1	2207	2	2	07	rep2	46	31	42	25	27	38	29	25	31	202	113	140	37	17	43	0	0	0	0	9	0	0	0	0	10	0	0	0	0	0	54	0	0	0	0
HAV_5844	HAV_5844_S55_R1_001.fastq.gz	Y2019	F2834T	Ames 27112	mixed	LN	N	sp1	spb1	2207	2	2	07	rep3	116	69	94	79	75	80	43	55	88	0	0	0	75	80	98	0	0	0	0	0	0	0	0	0	0	0	0	0	0	0	0	0	0	0	0
HAV_5845	HAV_5845_S106_R1_001.fastq.gz	Y2019	CML154Q	Ames 27083	ts	LN	N	sp1	spb1	2210	2	2	10	rep1	13	13	12	6	6	6	7	16	2	18	25	20	5	7	7	0	0	0	0	0	0	0	0	0	0	0	0	0	0	0	0	0	0	0	0
HAV_5846	HAV_5846_S114_R1_001.fastq.gz	Y2019	CML154Q	Ames 27083	ts	LN	N	sp1	spb1	2210	2	2	10	rep2	324	149	205	168	204	214	165	148	217	29	21	23	165	169	215	0	0	0	0	0	0	0	0	0	0	0	0	0	0	0	0	0	0	0	0
HAV_5847	HAV_5847_S122_R1_001.fastq.gz	Y2019	CML154Q	Ames 27083	ts	LN	N	sp1	spb1	2210	2	2	10	rep3	33	0	25	0	15	16	10	19	11	11	11	7	11	6	12	0	0	0	0	0	0	0	0	0	0	0	0	0	0	0	77	0	0	0	0
HAV_5848	HAV_5848_S130_R1_001.fastq.gz	Y2019	IL677A	Ames 27120	sweet	LN	N	sp1	spb1	2211	2	2	11	rep1	39	23	28	31	39	26	15	36	38	0	0	0	17	12	46	0	0	0	0	0	0	0	0	0	0	0	0	0	0	0	87	49	70	41	59
HAV_5849	HAV_5849_S1_R1_001.fastq.gz	Y2019	IL677A	Ames 27120	sweet	LN	N	sp1	spb1	2211	2	2	11	rep2	26	26	21	23	16	18	14	28	27	0	0	0	18	19	28	0	0	0	0	0	0	0	0	0	0	0	0	0	0	0	36	0	0	0	0
HAV_5850	HAV_5850_S10_R1_001.fastq.gz	Y2019	IL677A	Ames 27120	sweet	LN	N	sp1	spb1	2211	2	2	11	rep3	9	0	13	11	18	13	6	0	16	14	0	2	6	18	11	0	0	0	0	0	0	0	0	0	0	0	0	0	0	0	0	0	0	0	0
HAV_5851	HAV_5851_S19_R1_001.fastq.gz	Y2019	DE1	PI 606329	nss	LN	N	sp1	spb1	2214	2	2	14	rep1	0	0	0	0	7	0	9	0	0	0	0	0	0	4	0	0	0	0	0	0	0	0	0	0	0	0	0	0	0	0	0	0	0	0	0
HAV_5852	HAV_5852_S28_R1_001.fastq.gz	Y2019	DE1	PI 606329	nss	LN	N	sp1	spb1	2214	2	2	14	rep2	81	30	47	33	51	49	41	33	63	102	86	76	38	29	45	0	0	0	0	0	0	0	0	0	0	0	0	0	0	0	0	0	0	0	0
HAV_5853	HAV_5853_S37_R1_001.fastq.gz	Y2019	DE1	PI 606329	nss	LN	N	sp1	spb1	2214	2	2	14	rep3	7	0	1	0	3	0	15	6	4	9	15	0	0	0	11	0	0	0	0	0	0	0	0	0	0	0	0	0	0	0	0	0	0	0	0
HAV_5854	HAV_5854_S56_R1_001.fastq.gz	Y2019	KI11	Ames 27124	ts	LN	N	sp1	spb2	2215	2	2	15	rep1	116	78	107	79	102	107	69	79	119	55	48	29	79	80	118	15	0	25	18	22	12	17	18	0	16	27	16	9	12	25	0	0	0	0	0
HAV_5855	HAV_5855_S53_R1_001.fastq.gz	Y2019	KI11	Ames 27124	ts	LN	N	sp1	spb2	2215	2	2	15	rep2	15	18	9	9	17	22	9	13	17	14	16	5	10	10	16	0	0	7	8	29	0	0	0	0	0	0	0	9	0	0	0	0	0	0	0
HAV_5856	HAV_5856_S61_R1_001.fastq.gz	Y2019	KI11	Ames 27124	ts	LN	N	sp1	spb2	2215	2	2	15	rep3	37	24	25	29	28	28	24	16	36	18	14	11	20	25	41	0	0	0	0	0	0	0	0	0	0	0	0	0	0	0	0	0	0	0	0
HAV_5857	HAV_5857_S2_R1_001.fastq.gz	Y2019	MP339	PI 543916	mixed	LN	N	sp1	spb2	2218	2	2	18	rep1	79	33	47	35	42	48	28	23	35	37	37	41	34	30	54	0	0	0	0	0	0	0	0	0	0	0	0	0	0	0	0	0	0	0	46
HAV_5858	HAV_5858_S11_R1_001.fastq.gz	Y2019	MP339	PI 543916	mixed	LN	N	sp1	spb2	2218	2	2	18	rep2	101	78	104	72	96	97	74	64	104	18	15	22	71	53	106	16	13	18	15	13	11	13	17	0	16	18	13	19	13	21	0	0	0	0	0
HAV_5859	HAV_5859_S20_R1_001.fastq.gz	Y2019	MP339	PI 543916	mixed	LN	N	sp1	spb2	2218	2	2	18	rep3	11	0	16	0	13	24	0	0	31	0	0	0	0	17	9	0	0	0	0	0	0	0	0	0	0	0	0	0	0	0	0	0	0	0	0
HAV_5860	HAV_5860_S29_R1_001.fastq.gz	Y2019	MO46	PI 583351	nss	LN	N	sp1	spb2	2219	2	2	19	rep1	42	19	23	17	17	19	24	15	19	13	11	7	12	18	25	12	12	25	19	31	16	14	15	6	21	24	4	20	9	19	0	0	0	0	0
HAV_5861	HAV_5861_S38_R1_001.fastq.gz	Y2019	MO46	PI 583351	nss	LN	N	sp1	spb2	2219	2	2	19	rep2	51	31	21	14	37	23	33	24	29	18	13	10	28	16	43	10	0	20	14	0	5	0	13	0	13	5	9	18	11	12	0	0	0	43	0
HAV_5862	HAV_5862_S57_R1_001.fastq.gz	Y2019	MO46	PI 583351	nss	LN	N	sp1	spb2	2219	2	2	19	rep3	54	37	37	29	46	34	32	38	47	142	97	85	29	28	37	0	0	0	0	0	0	0	0	0	0	0	0	0	0	0	0	0	0	0	0
HAV_5863	HAV_5863_S54_R1_001.fastq.gz	Y2019	KI44	Ames 27260	ts	LN	N	sp1	spb2	2222	2	2	22	rep1	20	16	19	11	9	17	6	8	12	52	35	30	7	11	16	0	0	0	0	0	0	0	0	0	0	10	0	0	0	0	33	0	28	0	0
HAV_5864	HAV_5864_S62_R1_001.fastq.gz	Y2019	KI44	Ames 27260	ts	LN	N	sp1	spb2	2222	2	2	22	rep2	144	85	106	81	85	82	73	77	122	89	67	63	86	65	103	0	0	0	0	0	0	0	0	0	0	0	0	0	0	0	0	0	0	0	0
HAV_5865	HAV_5865_S3_R1_001.fastq.gz	Y2019	KI44	Ames 27260	ts	LN	N	sp1	spb2	2222	2	2	22	rep3	23	10	13	15	14	20	13	13	17	84	54	65	12	10	24	0	0	0	0	0	0	0	0	0	0	0	0	0	0	0	25	14	25	17	21
HAV_5866	HAV_5866_S12_R1_001.fastq.gz	Y2019	Check_B73xMo17			LN	N	sp1	spb2	2224	2	2	24	rep1	31	0	21	4	10	16	10	13	12	6	3	9	8	11	12	0	0	0	0	0	0	0	0	0	0	0	0	0	0	0	27	26	25	12	14
HAV_5867	HAV_5867_S21_R1_001.fastq.gz	Y2019	Check_B73xMo17			LN	N	sp1	spb2	2224	2	2	24	rep2	144	68	81	67	96	109	72	80	96	0	0	0	64	71	78	21	11	29	21	26	29	9	26	19	28	49	14	46	31	33	0	0	0	0	0
HAV_5868	HAV_5868_S30_R1_001.fastq.gz	Y2019	Check_B73xMo17			LN	N	sp1	spb2	2224	2	2	24	rep3	27	0	22	0	12	18	11	13	9	4	14	6	3	3	12	0	0	0	0	0	0	0	0	0	19	0	0	0	0	0	0	0	67	0	0
HAV_5869	HAV_5869_S39_R1_001.fastq.gz	Y2019	NC358	Ames 27175	ts	LN	N	sp1	spb2	2226	2	2	26	rep1	127	64	65	57	93	65	61	63	84	48	39	51	67	58	91	0	0	0	0	0	0	0	0	0	0	0	0	0	0	0	43	0	0	0	0
HAV_5870	HAV_5870_S47_R1_001.fastq.gz	Y2019	NC358	Ames 27175	ts	LN	N	sp1	spb2	2226	2	2	26	rep2	31	26	33	26	32	13	19	16	30	65	52	41	23	22	23	0	0	8	0	0	0	0	0	0	0	12	0	0	0	0	0	0	0	0	0
HAV_5871	HAV_5871_S55_R1_001.fastq.gz	Y2019	NC358	Ames 27175	ts	LN	N	sp1	spb2	2226	2	2	26	rep3	7	2	3	2	0	6	4	6	4	58	48	35	5	5	4	0	0	0	0	0	0	0	0	0	0	0	0	0	0	0	0	0	0	0	0
HAV_5872	HAV_5872_S63_R1_001.fastq.gz	Y2019	NC336	Ames 27164	ts	LN	N	sp1	spb2	2228	2	2	28	rep1	18	0	4	0	5	37	4	10	9	16	10	0	0	0	0	0	0	0	0	0	0	0	0	0	0	0	0	0	0	9	71	45	67	30	47
HAV_5873	HAV_5873_S4_R1_001.fastq.gz	Y2019	NC336	Ames 27164	ts	LN	N	sp1	spb2	2228	2	2	28	rep2	23	12	10	11	14	11	14	22	12	32	18	32	14	17	17	0	0	13	0	0	10	10	0	0	12	9	0	9	12	12	0	0	0	0	0
HAV_5874	HAV_5874_S13_R1_001.fastq.gz	Y2019	NC336	Ames 27164	ts	LN	N	sp1	spb2	2228	2	2	28	rep3	0	0	0	0	0	0	0	0	0	54	0	0	0	0	0	0	0	0	0	0	0	0	0	0	0	0	0	0	0	0	0	0	0	0	0
HAV_5875	HAV_5875_S22_R1_001.fastq.gz	Y2019	OH43E	Ames 27183	nss	LN	N	sp1	spb3	2229	2	2	29	rep1	26	16	16	17	18	23	16	22	17	95	65	53	13	15	26	0	0	0	0	0	0	0	0	0	0	0	0	0	0	0	45	0	0	0	0
HAV_5876	HAV_5876_S31_R1_001.fastq.gz	Y2019	OH43E	Ames 27183	nss	LN	N	sp1	spb3	2229	2	2	29	rep2	53	38	48	37	44	53	45	36	52	22	21	18	27	31	40	0	0	5	0	0	0	0	0	0	0	0	0	0	0	0	0	0	0	0	0
HAV_5877	HAV_5877_S40_R1_001.fastq.gz	Y2019	OH43E	Ames 27183	nss	LN	N	sp1	spb3	2229	2	2	29	rep3	70	37	46	41	55	70	42	46	59	10	10	3	45	47	67	0	0	0	0	0	0	0	0	0	0	0	0	0	0	0	34	0	0	0	0
HAV_5878	HAV_5878_S48_R1_001.fastq.gz	Y2019	W22	NSL 30053	nss	LN	N	sp1	spb3	2231	2	2	31	rep1	22	12	17	11	18	18	17	17	21	72	56	61	15	8	20	0	0	0	0	0	0	0	0	0	0	0	0	0	0	0	0	0	0	0	0
HAV_5879	HAV_5879_S56_R1_001.fastq.gz	Y2019	W22	NSL 30053	nss	LN	N	sp1	spb3	2231	2	2	31	rep2	61	41	43	26	40	45	34	37	56	44	31	35	24	35	48	0	0	0	0	0	0	0	0	0	0	0	0	0	0	0	0	0	0	0	0
HAV_5880	HAV_5880_S64_R1_001.fastq.gz	Y2019	W22	NSL 30053	nss	LN	N	sp1	spb3	2231	2	2	31	rep3	71	41	59	55	61	68	49	56	69	2	5	8	52	38	86	0	0	0	0	0	0	0	0	0	0	0	0	0	0	0	0	0	0	0	0
HAV_5881	HAV_5881_S5_R1_001.fastq.gz	Y2019	W117HT	Ames 8399	mixed	LN	N	sp1	spb3	2233	2	2	33	rep1	16	7	9	6	11	10	7	9	15	76	49	51	7	8	12	13	0	11	9	15	0	8	8	0	16	9	9	10	14	17	31	0	0	0	0
HAV_5882	HAV_5882_S14_R1_001.fastq.gz	Y2019	W117HT	Ames 8399	mixed	LN	N	sp1	spb3	2233	2	2	33	rep2	18	8	12	8	22	12	13	8	16	52	39	38	14	13	18	0	0	0	0	0	0	0	0	0	0	0	0	0	0	0	53	29	32	0	25
HAV_5883	HAV_5883_S23_R1_001.fastq.gz	Y2019	W117HT	Ames 8399	mixed	LN	N	sp1	spb3	2233	2	2	33	rep3	11	9	10	3	15	6	11	5	13	27	19	12	6	7	7	0	0	0	0	0	0	0	0	0	0	0	0	0	0	0	21	0	11	0	15
HAV_5884	HAV_5884_S32_R1_001.fastq.gz	Y2019	Check_B73xMo17			LN	N	sp1	spb3	2236	2	2	36	rep1	17	12	11	11	10	18	11	9	16	39	34	26	6	6	18	0	0	14	0	18	0	0	6	0	9	8	0	10	0	17	0	0	0	0	0
HAV_5885	HAV_5885_S41_R1_001.fastq.gz	Y2019	Check_B73xMo17			LN	N	sp1	spb3	2236	2	2	36	rep2	32	19	19	12	16	8	13	15	22	24	29	17	12	11	22	0	0	14	0	10	0	0	0	0	11	9	0	14	0	10	0	40	0	0	0
HAV_5886	HAV_5886_S49_R1_001.fastq.gz	Y2019	Check_B73xMo17			LN	N	sp1	spb3	2236	2	2	36	rep3	19	17	13	10	9	17	16	8	17	30	22	17	11	13	13	0	0	0	0	0	0	0	0	0	0	0	0	0	0	0	0	0	0	0	0
HAV_5887	HAV_5887_S57_R1_001.fastq.gz	Y2019	VA35	PI 587150	nss	LN	N	sp1	spb3	2238	2	2	38	rep1	83	48	53	47	64	51	44	48	58	13	7	8	32	28	61	11	0	11	0	14	9	8	17	0	20	16	0	12	0	23	0	0	0	0	0
HAV_5888	HAV_5888_S65_R1_001.fastq.gz	Y2019	VA35	PI 587150	nss	LN	N	sp1	spb3	2238	2	2	38	rep2	60	45	49	38	57	47	43	39	37	14	18	17	40	42	59	0	0	0	0	0	0	0	0	0	0	0	0	0	0	0	0	0	0	0	0
HAV_5889	HAV_5889_S6_R1_001.fastq.gz	Y2019	VA35	PI 587150	nss	LN	N	sp1	spb3	2238	2	2	38	rep3	45	20	38	27	29	25	21	31	39	13	4	7	29	31	26	0	0	0	0	0	0	0	0	0	0	0	0	0	0	0	0	0	0	0	0
HAV_5890	HAV_5890_S15_R1_001.fastq.gz	Y2019	OH7B	Ames 19323	nss	LN	N	sp1	spb3	2239	2	2	39	rep1	40	18	14	16	17	28	15	19	27	48	35	39	22	16	30	0	0	0	0	0	0	0	0	0	0	0	0	8	0	0	0	0	37	0	0
HAV_5891	HAV_5891_S24_R1_001.fastq.gz	Y2019	OH7B	Ames 19323	nss	LN	N	sp1	spb3	2239	2	2	39	rep2	16	0	14	0	3	21	0	9	8	13	14	0	0	0	0	0	0	0	0	0	0	0	0	0	0	0	0	0	0	0	0	0	0	0	0
HAV_5892	HAV_5892_S33_R1_001.fastq.gz	Y2019	OH7B	Ames 19323	nss	LN	N	sp1	spb3	2239	2	2	39	rep3	10	0	5	7	9	5	8	11	7	18	18	12	3	3	10	0	0	0	0	0	0	0	0	0	0	0	0	0	0	0	0	0	0	0	0
HAV_5893	HAV_5893_S42_R1_001.fastq.gz	Y2019	PA762	Ames 27184	nss	LN	N	sp1	spb3	2242	2	2	42	rep1	63	39	31	42	46	52	27	29	43	12	9	18	31	34	40	0	0	0	0	0	0	0	0	0	0	0	0	0	0	0	0	0	0	0	0
HAV_5894	HAV_5894_S50_R1_001.fastq.gz	Y2019	PA762	Ames 27184	nss	LN	N	sp1	spb3	2242	2	2	42	rep2	36	7	11	13	19	13	12	19	16	41	28	25	7	8	22	0	0	0	0	0	0	0	0	0	0	0	0	0	0	0	47	0	0	0	0
HAV_5895	HAV_5895_S58_R1_001.fastq.gz	Y2019	PA762	Ames 27184	nss	LN	N	sp1	spb3	2242	2	2	42	rep3	24	4	14	22	19	21	17	7	23	19	9	13	9	16	18	0	0	0	0	0	0	0	0	0	0	0	0	0	0	0	0	0	0	0	0
HAV_5896	HAV_5896_S66_R1_001.fastq.gz	Y2019	B64	PI 550440	ss	LN	N	sp2	spb1	2243	2	2	43	rep1	39	14	29	11	14	21	12	19	21	5	6	5	10	11	20	0	0	0	0	0	0	0	0	0	0	0	0	0	0	11	0	0	0	0	0
HAV_5897	HAV_5897_S7_R1_001.fastq.gz	Y2019	B64	PI 550440	ss	LN	N	sp2	spb1	2243	2	2	43	rep2	18	9	19	16	19	22	10	13	19	3	6	2	20	11	20	0	0	0	0	0	0	0	0	0	0	0	0	0	0	0	32	0	0	0	0
HAV_5898	HAV_5898_S16_R1_001.fastq.gz	Y2019	B64	PI 550440	ss	LN	N	sp2	spb1	2243	2	2	43	rep3	12	8	8	13	11	16	10	10	8	41	20	30	21	8	20	0	0	0	0	0	0	0	0	0	0	0	0	0	0	0	0	0	0	0	0
HAV_5899	HAV_5899_S25_R1_001.fastq.gz	Y2019	A634	Ames 19308	ss	LN	N	sp2	spb1	2245	2	2	45	rep1	6	0	4	2	5	11	3	1	10	58	47	46	3	3	7	0	0	0	0	0	0	0	0	0	0	0	0	0	0	0	0	0	0	0	0
HAV_5900	HAV_5900_S34_R1_001.fastq.gz	Y2019	A634	Ames 19308	ss	LN	N	sp2	spb1	2245	2	2	45	rep2	54	31	33	17	37	36	22	33	48	52	47	50	28	34	44	0	0	0	0	0	0	0	0	0	0	0	0	0	0	0	0	0	0	0	0
HAV_5901	HAV_5901_S43_R1_001.fastq.gz	Y2019	A634	Ames 19308	ss	LN	N	sp2	spb1	2245	2	2	45	rep3	44	14	31	0	12	18	16	7	15	4	6	3	13	17	16	0	0	0	0	0	0	0	0	0	0	39	0	38	0	0	0	0	0	0	0
HAV_5902	HAV_5902_S58_R1_001.fastq.gz	Y2019	A654	PI 587141	nss	LN	N	sp2	spb1	2248	2	2	48	rep1	23	21	24	21	18	21	8	22	25	9	10	9	21	18	15	0	0	0	0	0	0	0	0	0	0	0	0	0	0	0	0	0	0	0	0
HAV_5903	HAV_5903_S59_R1_001.fastq.gz	Y2019	A654	PI 587141	nss	LN	N	sp2	spb1	2248	2	2	48	rep2	79	43	52	41	48	63	49	35	77	52	36	46	57	41	67	0	0	0	0	0	0	0	0	0	0	0	0	0	0	0	58	40	38	30	37
HAV_5904	HAV_5904_S67_R1_001.fastq.gz	Y2019	A654	PI 587141	nss	LN	N	sp2	spb1	2248	2	2	48	rep3	25	13	11	10	16	23	15	15	17	90	51	44	10	13	22	0	0	0	0	0	0	0	0	0	0	0	0	0	0	0	0	0	0	0	0
HAV_5905	HAV_5905_S8_R1_001.fastq.gz	Y2019	Check_B73xMo17			LN	N	sp2	spb1	2249	2	2	49	rep1	45	18	24	17	23	21	23	11	31	60	31	39	14	24	27	0	0	0	18	11	0	7	0	0	11	0	4	13	9	13	0	0	0	0	0
HAV_5906	HAV_5906_S17_R1_001.fastq.gz	Y2019	Check_B73xMo17			LN	N	sp2	spb1	2249	2	2	49	rep2	94	62	63	55	64	82	50	53	73	4	9	9	58	47	73	0	0	0	0	0	0	0	0	0	0	0	0	0	0	0	0	0	0	0	0
HAV_5907	HAV_5907_S26_R1_001.fastq.gz	Y2019	Check_B73xMo17			LN	N	sp2	spb1	2249	2	2	49	rep3	103	53	80	50	74	66	61	45	80	10	3	9	84	53	85	0	0	0	0	0	0	0	0	0	0	0	0	0	0	0	0	0	0	0	0
HAV_5908	HAV_5908_S35_R1_001.fastq.gz	Y2019	B76	PI 550483	ss	LN	N	sp2	spb1	2252	2	2	52	rep1	117	57	72	51	78	78	59	46	82	7	4	5	61	57	77	0	0	0	0	0	0	0	0	0	0	0	0	0	0	0	0	0	0	0	0
HAV_5909	HAV_5909_S44_R1_001.fastq.gz	Y2019	B76	PI 550483	ss	LN	N	sp2	spb1	2252	2	2	52	rep2	90	48	78	67	79	68	63	50	66	24	20	21	52	50	88	0	0	0	0	0	0	0	11	0	0	10	0	14	0	8	0	0	0	0	0
HAV_5910	HAV_5910_S59_R1_001.fastq.gz	Y2019	B76	PI 550483	ss	LN	N	sp2	spb1	2252	2	2	52	rep3	61	43	44	41	41	38	35	32	49	39	37	23	45	43	46	0	0	0	0	0	0	0	0	0	0	0	0	0	0	0	0	0	0	0	0
HAV_5911	HAV_5911_S60_R1_001.fastq.gz	Y2019	A682	PI 587143	nss	LN	N	sp2	spb1	2254	2	2	54	rep1	41	16	39	21	29	31	19	15	31	7	5	9	18	15	20	0	0	0	0	0	0	0	0	0	0	0	0	0	0	0	0	0	0	0	0
HAV_5912	HAV_5912_S68_R1_001.fastq.gz	Y2019	A682	PI 587143	nss	LN	N	sp2	spb1	2254	2	2	54	rep2	192	102	135	104	140	110	120	108	162	29	20	21	106	102	152	0	0	0	0	0	0	0	0	0	0	0	0	0	0	0	0	12	43	0	0
HAV_5913	HAV_5913_S69_R1_001.fastq.gz	Y2019	A682	PI 587143	nss	LN	N	sp2	spb1	2254	2	2	54	rep3	312	183	226	136	218	219	183	182	225	16	12	9	165	170	213	0	0	0	0	0	0	0	0	0	0	0	0	0	0	0	18	0	63	0	0
HAV_5914	HAV_5914_S60_R1_001.fastq.gz	Y2019	CM105	PI 587124	ss	LN	N	sp2	spb1	2256	2	2	56	rep1	116	80	87	52	92	84	74	71	100	68	46	39	63	54	94	0	11	0	0	11	16	17	10	0	13	16	0	17	13	20	0	0	0	0	0
HAV_5915	HAV_5915_S85_R1_001.fastq.gz	Y2019	CM105	PI 587124	ss	LN	N	sp2	spb1	2256	2	2	56	rep2	55	28	30	23	30	28	20	24	29	78	45	61	30	18	34	0	0	10	0	0	0	0	0	0	0	0	0	0	0	0	0	0	0	0	0
HAV_5916	HAV_5916_S93_R1_001.fastq.gz	Y2019	CM105	PI 587124	ss	LN	N	sp2	spb1	2256	2	2	56	rep3	64	31	52	33	54	52	45	47	54	10	10	5	29	38	76	0	0	0	0	0	0	0	0	0	0	0	0	0	0	0	0	0	0	0	0
HAV_5917	HAV_5917_S101_R1_001.fastq.gz	Y2019	MS1334	Ames 24752	nss	LN	N	sp2	spb2	2257	2	2	57	rep1	28	17	25	22	27	23	22	13	23	65	48	45	14	25	26	0	0	11	0	9	0	0	0	0	13	7	0	0	0	11	0	0	0	0	0
HAV_5918	HAV_5918_S61_R1_001.fastq.gz	Y2019	MS1334	Ames 24752	nss	LN	N	sp2	spb2	2257	2	2	57	rep2	99	48	55	56	53	55	65	62	81	9	11	6	58	48	90	0	0	0	0	0	0	0	0	0	0	0	0	0	0	0	0	0	0	0	0
HAV_5919	HAV_5919_S117_R1_001.fastq.gz	Y2019	MS1334	Ames 24752	nss	LN	N	sp2	spb2	2257	2	2	57	rep3	33	21	18	19	19	20	21	15	30	18	9	9	16	10	30	0	0	0	0	0	0	0	9	0	0	0	0	0	0	0	0	0	0	0	0
HAV_5920	HAV_5920_S125_R1_001.fastq.gz	Y2019	IA2132	Ames 28364	sweet	LN	N	sp2	spb2	2260	2	2	60	rep1	35	22	27	17	28	32	13	16	24	55	28	34	13	15	32	0	0	0	0	0	0	0	0	0	0	0	0	0	0	0	25	10	27	15	0
HAV_5921	HAV_5921_S70_R1_001.fastq.gz	Y2019	IA2132	Ames 28364	sweet	LN	N	sp2	spb2	2260	2	2	60	rep2	46	19	31	21	23	35	18	25	34	0	0	0	26	22	39	0	0	0	10	0	0	0	0	0	0	0	0	0	0	0	12	12	19	0	16
HAV_5922	HAV_5922_S78_R1_001.fastq.gz	Y2019	IA2132	Ames 28364	sweet	LN	N	sp2	spb2	2260	2	2	60	rep3	69	53	45	52	61	59	39	49	67	40	29	35	38	36	70	28	21	36	30	30	18	19	31	12	44	38	24	30	31	43	48	36	42	22	35
HAV_5923	HAV_5923_S86_R1_001.fastq.gz	Y2019	M14	NSL 30867	nss	LN	N	sp2	spb2	2262	2	2	62	rep1	164	101	105	81	141	133	97	101	134	15	6	12	90	98	138	0	0	0	0	0	0	0	0	0	0	0	0	0	0	0	0	0	0	0	0
HAV_5924	HAV_5924_S94_R1_001.fastq.gz	Y2019	M14	NSL 30867	nss	LN	N	sp2	spb2	2262	2	2	62	rep2	83	61	61	56	50	84	56	53	51	40	44	30	46	43	62	0	0	0	0	0	0	0	0	0	0	0	0	0	0	0	0	0	0	0	0
HAV_5925	HAV_5925_S102_R1_001.fastq.gz	Y2019	M14	NSL 30867	nss	LN	N	sp2	spb2	2262	2	2	62	rep3	58	24	28	28	15	23	20	22	31	115	99	80	19	25	39	0	0	0	0	0	0	0	0	0	0	0	0	15	0	0	0	0	0	0	0
HAV_5926	HAV_5926_S110_R1_001.fastq.gz	Y2019	EP1	Ames 27111	mixed	LN	N	sp2	spb2	2263	2	2	63	rep1	139	108	82	74	102	95	75	89	113	4	4	7	81	85	129	0	0	0	0	0	0	0	0	0	0	0	0	0	0	0	39	18	28	17	18
HAV_5927	HAV_5927_S118_R1_001.fastq.gz	Y2019	EP1	Ames 27111	mixed	LN	N	sp2	spb2	2263	2	2	63	rep2	393	226	285	208	270	273	219	226	308	12	19	4	212	197	314	16	15	11	11	10	0	0	13	0	13	17	0	13	6	19	31	14	14	12	17
HAV_5928	HAV_5928_S126_R1_001.fastq.gz	Y2019	EP1	Ames 27111	mixed	LN	N	sp2	spb2	2263	2	2	63	rep3	148	87	96	62	121	99	82	95	100	13	8	15	66	67	114	80	61	98	79	93	80	63	87	54	103	113	65	110	63	121	44	23	30	19	27
HAV_5929	HAV_5929_S71_R1_001.fastq.gz	Y2019	IDS91	PI 686063	popcorn	LN	N	sp2	spb2	2266	2	2	66	rep1	38	0	17	11	26	16	10	19	33	4	3	3	8	21	9	0	0	0	0	0	0	0	0	0	0	0	0	0	0	0	33	0	19	0	0
HAV_5930	HAV_5930_S79_R1_001.fastq.gz	Y2019	IDS91	PI 686063	popcorn	LN	N	sp2	spb2	2266	2	2	66	rep2	126	94	76	66	95	91	74	76	88	15	5	14	80	74	84	0	0	0	0	0	0	0	0	0	0	0	0	0	0	0	167	89	123	55	129
HAV_5931	HAV_5931_S87_R1_001.fastq.gz	Y2019	IDS91	PI 686063	popcorn	LN	N	sp2	spb2	2266	2	2	66	rep3	29	28	22	8	22	27	8	19	21	0	0	0	18	16	30	0	0	0	0	0	0	0	0	0	0	0	0	0	10	0	46	0	0	0	0
HAV_5932	HAV_5932_S95_R1_001.fastq.gz	Y2019	CO255	Ames 27107	mixed	LN	N	sp2	spb2	2267	2	2	67	rep1	37	24	24	24	35	26	27	26	25	22	5	9	26	16	27	0	0	0	0	0	0	0	0	0	0	0	0	0	0	0	97	61	78	28	43
HAV_5933	HAV_5933_S103_R1_001.fastq.gz	Y2019	CO255	Ames 27107	mixed	LN	N	sp2	spb2	2267	2	2	67	rep2	79	37	49	30	57	59	40	41	45	10	6	9	48	34	51	0	0	12	8	0	7	11	0	0	12	14	8	11	12	13	62	40	52	31	39
HAV_5934	HAV_5934_S62_R1_001.fastq.gz	Y2019	CO255	Ames 27107	mixed	LN	N	sp2	spb2	2267	2	2	67	rep3	19	0	9	0	0	32	0	11	22	0	0	0	0	0	0	0	0	0	0	0	0	0	0	0	0	0	0	0	0	0	54	0	0	34	0
HAV_5935	HAV_5935_S119_R1_001.fastq.gz	Y2019	H105W	PI 587127	mixed	LN	N	sp2	spb2	2270	2	2	70	rep1	72	38	52	45	61	54	53	41	56	29	28	31	35	42	63	16	7	18	14	10	8	7	11	0	13	21	11	15	9	23	0	0	50	0	0
HAV_5936	HAV_5936_S127_R1_001.fastq.gz	Y2019	H105W	PI 587127	mixed	LN	N	sp2	spb2	2270	2	2	70	rep2	18	13	23	14	21	20	17	17	30	62	48	41	14	16	25	0	0	0	0	0	0	0	0	0	0	0	0	0	0	0	0	0	0	0	0
HAV_5937	HAV_5937_S72_R1_001.fastq.gz	Y2019	H105W	PI 587127	mixed	LN	N	sp2	spb2	2270	2	2	70	rep3	29	19	27	10	18	12	21	22	24	52	31	42	13	5	13	0	0	0	0	0	0	0	0	0	0	0	0	0	0	0	156	95	101	67	96
HAV_5938	HAV_5938_S80_R1_001.fastq.gz	Y2019	NC308	Ames 27150	ss	LN	N	sp2	spb3	2271	2	2	71	rep1	94	56	71	64	87	78	68	52	74	4	3	7	71	43	94	13	0	14	0	8	12	0	12	0	0	13	10	9	0	10	80	24	39	17	31
HAV_5939	HAV_5939_S88_R1_001.fastq.gz	Y2019	NC308	Ames 27150	ss	LN	N	sp2	spb3	2271	2	2	71	rep2	144	64	96	71	107	97	75	72	115	5	7	5	82	75	124	18	10	17	11	20	15	8	0	0	17	14	15	23	21	12	22	13	18	14	0
HAV_5940	HAV_5940_S96_R1_001.fastq.gz	Y2019	NC308	Ames 27150	ss	LN	N	sp2	spb3	2271	2	2	71	rep3	139	70	90	53	91	88	59	68	91	39	25	20	84	60	110	0	0	5	0	0	0	0	0	0	10	0	0	0	0	0	93	44	82	40	45
HAV_5941	HAV_5941_S104_R1_001.fastq.gz	Y2019	NC292	Ames 27142	ss	LN	N	sp2	spb3	2273	2	2	73	rep1	122	62	61	66	68	84	52	68	75	40	33	35	53	61	107	17	8	23	13	16	15	12	24	0	14	31	15	23	23	23	0	0	0	0	0
HAV_5942	HAV_5942_S63_R1_001.fastq.gz	Y2019	NC292	Ames 27142	ss	LN	N	sp2	spb3	2273	2	2	73	rep2	79	47	45	45	60	67	34	46	64	19	17	12	52	36	64	24	20	24	29	29	15	16	16	23	37	32	23	29	32	37	0	0	0	0	0
HAV_5943	HAV_5943_S120_R1_001.fastq.gz	Y2019	NC292	Ames 27142	ss	LN	N	sp2	spb3	2273	2	2	73	rep3	265	141	154	148	189	161	152	138	214	33	28	31	129	139	196	15	7	27	16	25	22	20	16	9	16	15	12	22	20	22	0	0	0	0	0
HAV_5944	HAV_5944_S128_R1_001.fastq.gz	Y2019	NC312	Ames 27152	ss	LN	N	sp2	spb3	2275	2	2	75	rep1	43	23	41	30	25	32	29	28	39	14	6	10	23	26	39	0	0	0	0	0	0	0	0	0	0	0	0	0	0	0	44	0	16	0	16
HAV_5945	HAV_5945_S73_R1_001.fastq.gz	Y2019	NC312	Ames 27152	ss	LN	N	sp2	spb3	2275	2	2	75	rep2	54	14	40	23	35	30	26	27	42	35	24	24	30	25	37	0	0	0	0	0	0	0	0	0	8	0	0	11	0	0	0	0	0	0	0
HAV_5946	HAV_5946_S81_R1_001.fastq.gz	Y2019	NC312	Ames 27152	ss	LN	N	sp2	spb3	2275	2	2	75	rep3	154	81	99	76	111	99	88	100	123	75	52	47	84	92	131	0	0	0	0	0	0	0	0	0	0	0	0	0	0	0	37	0	0	0	0
HAV_5947	HAV_5947_S89_R1_001.fastq.gz	Y2019	W153R	PI 587154	nss	LN	N	sp2	spb3	2278	2	2	78	rep1	66	47	66	47	65	64	43	38	69	21	24	18	52	34	75	0	0	0	0	0	0	0	0	0	0	10	0	0	0	0	113	67	86	47	63
HAV_5948	HAV_5948_S97_R1_001.fastq.gz	Y2019	W153R	PI 587154	nss	LN	N	sp2	spb3	2278	2	2	78	rep2	3	3	4	1	7	5	4	5	7	26	19	23	5	5	4	0	0	0	0	0	0	0	0	0	0	0	0	0	0	0	0	0	0	0	0
HAV_5949	HAV_5949_S105_R1_001.fastq.gz	Y2019	W153R	PI 587154	nss	LN	N	sp2	spb3	2278	2	2	78	rep3	20	5	10	4	9	4	13	4	8	14	12	12	11	8	11	0	0	0	0	0	0	0	0	0	0	0	0	0	0	0	49	29	25	0	22
HAV_5950	HAV_5950_S113_R1_001.fastq.gz	Y2019	R168	Ames 19326	nss	LN	N	sp2	spb3	2280	2	2	80	rep1	8	0	12	15	10	26	7	0	30	6	0	0	0	9	0	0	0	0	0	0	0	0	0	0	0	0	0	0	0	0	83	51	63	44	59
HAV_5951	HAV_5951_S121_R1_001.fastq.gz	Y2019	R168	Ames 19326	nss	LN	N	sp2	spb3	2280	2	2	80	rep2	35	21	25	12	14	27	13	7	22	27	12	17	13	13	24	0	0	0	0	0	0	0	0	0	0	0	0	0	0	0	40	0	19	0	0
HAV_5952	HAV_5952_S129_R1_001.fastq.gz	Y2019	R168	Ames 19326	nss	LN	N	sp2	spb3	2280	2	2	80	rep3	25	21	23	14	25	32	10	18	24	21	9	14	16	12	25	0	0	0	0	0	0	0	0	0	0	0	0	0	0	0	0	0	0	0	0
HAV_5953	HAV_5953_S74_R1_001.fastq.gz	Y2019	Check_B73xMo17			LN	N	sp2	spb3	2281	2	2	81	rep1	49	29	34	23	30	40	32	28	34	0	0	0	21	20	38	0	0	0	0	0	0	0	0	0	0	0	0	0	0	0	0	0	0	0	0
HAV_5954	HAV_5954_S82_R1_001.fastq.gz	Y2019	Check_B73xMo17			LN	N	sp2	spb3	2281	2	2	81	rep2	109	80	77	59	86	87	73	74	87	0	0	0	51	57	100	0	0	9	0	20	0	0	0	0	12	11	0	0	0	0	0	0	0	0	0
HAV_5955	HAV_5955_S90_R1_001.fastq.gz	Y2019	Check_B73xMo17			LN	N	sp2	spb3	2281	2	2	81	rep3	34	28	28	26	21	17	21	21	20	11	6	10	18	23	21	0	0	0	11	0	0	0	12	0	13	9	0	11	0	9	0	0	0	0	0
HAV_5956	HAV_5956_S98_R1_001.fastq.gz	Y2019	W182B	Ames 19330	nss	LN	N	sp2	spb3	2283	2	2	83	rep1	62	36	49	47	69	44	48	46	46	270	207	176	44	33	61	0	0	0	0	0	0	0	0	0	0	0	0	0	0	0	56	26	25	26	29
HAV_5957	HAV_5957_S106_R1_001.fastq.gz	Y2019	W182B	Ames 19330	nss	LN	N	sp2	spb3	2283	2	2	83	rep2	122	56	79	51	104	86	73	80	87	132	98	89	71	54	91	0	0	15	0	13	0	0	0	0	11	12	0	7	0	0	41	23	29	11	25
HAV_5958	HAV_5958_S114_R1_001.fastq.gz	Y2019	W182B	Ames 19330	nss	LN	N	sp2	spb3	2283	2	2	83	rep3	14	5	8	18	9	9	8	11	13	32	33	28	4	14	10	0	0	0	0	0	0	0	0	0	0	0	0	0	0	0	0	0	0	0	0
HAV_5959	HAV_5959_S122_R1_001.fastq.gz	Y2019	B46	PI 550469	mixed	LN	N	sp3	spb1	2302	2	3	02	rep1	0	0	0	5	0	0	0	0	14	6	0	5	20	0	29	0	0	0	0	0	0	0	0	0	0	0	0	0	0	0	0	0	31	0	0
HAV_5960	HAV_5960_S130_R1_001.fastq.gz	Y2019	B46	PI 550469	mixed	LN	N	sp3	spb1	2302	2	3	02	rep2	44	14	26	18	28	20	14	21	22	83	59	62	23	13	32	0	0	0	0	0	0	0	0	0	0	0	0	0	0	0	0	0	0	0	0
HAV_5961	HAV_5961_S75_R1_001.fastq.gz	Y2019	B46	PI 550469	mixed	LN	N	sp3	spb1	2302	2	3	02	rep3	42	17	28	26	17	37	27	31	34	30	21	24	19	21	33	12	0	13	9	0	9	0	9	0	8	15	0	15	0	13	0	0	0	0	0
HAV_5962	HAV_5962_S83_R1_001.fastq.gz	Y2019	IDS28	PI 686059	popcorn	LN	N	sp3	spb1	2304	2	3	04	rep1	71	37	37	39	44	56	43	44	61	36	26	33	38	37	61	15	0	8	12	8	0	0	0	0	20	6	8	6	10	13	0	0	0	0	0
HAV_5963	HAV_5963_S91_R1_001.fastq.gz	Y2019	IDS28	PI 686059	popcorn	LN	N	sp3	spb1	2304	2	3	04	rep2	91	51	57	51	78	70	68	41	91	32	26	30	53	58	80	0	0	0	0	0	0	0	0	0	0	0	0	0	0	0	0	0	0	0	0
HAV_5964	HAV_5964_S99_R1_001.fastq.gz	Y2019	IDS28	PI 686059	popcorn	LN	N	sp3	spb1	2304	2	3	04	rep3	102	58	67	45	63	69	40	51	73	63	31	42	43	47	73	20	15	29	20	23	14	14	23	8	24	24	14	29	23	16	0	0	0	0	0
HAV_5965	HAV_5965_S107_R1_001.fastq.gz	Y2019	B37	PI 550467	ss	LN	N	sp3	spb1	2306	2	3	06	rep1	87	40	58	40	59	64	51	56	80	0	0	0	54	50	78	0	0	0	0	0	0	0	0	0	0	0	0	0	0	0	0	0	0	0	68
HAV_5966	HAV_5966_S115_R1_001.fastq.gz	Y2019	B37	PI 550467	ss	LN	N	sp3	spb1	2306	2	3	06	rep2	66	38	43	41	40	49	38	25	51	5	12	10	32	29	44	0	0	0	0	0	0	0	0	0	0	0	0	0	0	0	85	0	0	0	0
HAV_5967	HAV_5967_S123_R1_001.fastq.gz	Y2019	B37	PI 550467	ss	LN	N	sp3	spb1	2306	2	3	06	rep3	11	7	7	7	6	4	9	17	8	23	26	11	9	9	9	0	0	0	0	0	0	0	0	0	0	0	0	0	0	0	0	0	36	0	0
HAV_5968	HAV_5968_S131_R1_001.fastq.gz	Y2019	Check_B73xMo17			LN	N	sp3	spb1	2308	2	3	08	rep1	17	10	10	6	12	20	7	15	16	50	61	53	8	9	14	0	0	0	0	0	0	0	0	0	0	0	0	0	0	0	0	0	0	0	0
HAV_5969	HAV_5969_S76_R1_001.fastq.gz	Y2019	Check_B73xMo17			LN	N	sp3	spb1	2308	2	3	08	rep2	108	77	78	54	83	100	55	55	98	32	25	18	58	54	108	0	0	16	0	0	13	0	0	0	16	8	6	7	3	14	0	0	0	0	0
HAV_5970	HAV_5970_S84_R1_001.fastq.gz	Y2019	Check_B73xMo17			LN	N	sp3	spb1	2308	2	3	08	rep3	65	50	41	43	47	37	36	34	45	12	15	14	34	35	53	0	0	0	0	0	0	0	0	0	0	0	0	0	0	0	0	0	0	0	0
HAV_5971	HAV_5971_S92_R1_001.fastq.gz	Y2019	B164	Ames 27066	mixed	LN	N	sp3	spb1	2310	2	3	10	rep1	105	56	56	67	77	72	52	68	66	12	14	9	55	74	70	0	0	0	0	0	0	0	0	0	0	0	0	0	0	0	0	0	0	0	0
HAV_5972	HAV_5972_S100_R1_001.fastq.gz	Y2019	B164	Ames 27066	mixed	LN	N	sp3	spb1	2310	2	3	10	rep2	35	23	18	20	26	30	21	23	25	50	43	38	19	16	31	0	0	0	0	0	0	0	0	0	0	0	0	0	0	0	0	0	0	0	0
HAV_5973	HAV_5973_S108_R1_001.fastq.gz	Y2019	B164	Ames 27066	mixed	LN	N	sp3	spb1	2310	2	3	10	rep3	13	7	12	4	10	8	6	5	5	43	37	25	5	7	9	0	0	0	0	0	0	0	0	0	0	0	0	0	0	0	0	0	0	0	0
HAV_5974	HAV_5974_S64_R1_001.fastq.gz	Y2019	Check_B73xMo17			LN	N	sp3	spb1	2311	2	3	11	rep1	36	26	26	28	34	33	20	26	36	20	15	15	38	24	35	0	0	0	0	0	0	0	0	0	0	0	0	0	0	0	0	0	0	0	0
HAV_5975	HAV_5975_S124_R1_001.fastq.gz	Y2019	Check_B73xMo17			LN	N	sp3	spb1	2311	2	3	11	rep2	82	55	66	50	54	51	50	65	60	72	65	51	46	44	64	21	0	20	16	15	15	12	17	0	21	14	17	17	17	17	0	0	0	0	0
HAV_5976	HAV_5976_S132_R1_001.fastq.gz	Y2019	Check_B73xMo17			LN	N	sp3	spb1	2311	2	3	11	rep3	42	24	26	24	18	27	19	21	23	67	65	43	19	19	29	0	0	0	0	0	0	0	11	0	0	5	0	0	0	10	0	0	0	0	0
HAV_5977	HAV_5977_S1_R1_001.fastq.gz	Y2019	B14A	PI 550461	ss	LN	N	sp3	spb1	2314	2	3	14	rep1	59	30	26	26	40	34	26	32	31	0	0	0	24	33	34	0	0	0	0	0	0	0	0	0	0	0	0	0	0	0	0	43	0	0	0
HAV_5978	HAV_5978_S10_R1_001.fastq.gz	Y2019	B14A	PI 550461	ss	LN	N	sp3	spb1	2314	2	3	14	rep2	52	20	26	25	29	31	26	25	39	51	30	31	22	21	46	0	0	0	0	0	0	0	0	0	0	0	0	0	0	0	0	0	0	0	0
HAV_5979	HAV_5979_S19_R1_001.fastq.gz	Y2019	B14A	PI 550461	ss	LN	N	sp3	spb1	2314	2	3	14	rep3	46	20	32	20	34	24	31	24	37	23	24	19	19	22	31	0	0	0	0	0	0	0	0	0	0	0	0	0	0	0	0	0	0	0	0
HAV_5980	HAV_5980_S28_R1_001.fastq.gz	Y2019	NC260	Ames 27140	nss	LN	N	sp3	spb2	2316	2	3	16	rep1	72	32	49	35	48	52	32	45	56	18	18	15	43	35	49	0	0	0	0	0	0	0	0	0	0	0	0	0	0	0	30	0	14	0	0
HAV_5983	HAV_5983_S51_R1_001.fastq.gz	Y2019	R177	NSL 30894	nss	LN	N	sp3	spb2	2317	2	3	17	rep1	221	109	151	121	139	135	122	115	166	3	6	6	106	142	169	0	0	0	0	0	0	0	0	0	0	0	0	0	0	0	0	15	0	0	0
HAV_5984	HAV_5984_S59_R1_001.fastq.gz	Y2019	R177	NSL 30894	nss	LN	N	sp3	spb2	2317	2	3	17	rep2	113	76	71	55	65	54	47	50	83	13	7	7	60	65	88	0	0	0	0	7	0	0	0	0	15	0	0	7	15	10	0	0	0	0	35
HAV_5985	HAV_5985_S2_R1_001.fastq.gz	Y2019	R177	NSL 30894	nss	LN	N	sp3	spb2	2317	2	3	17	rep3	38	19	25	12	18	26	22	26	25	17	10	11	28	16	30	0	0	0	0	0	0	0	0	0	0	0	0	0	0	0	66	0	0	0	0
HAV_5986	HAV_5986_S11_R1_001.fastq.gz	Y2019	NC310	Ames 27151	ss	LN	N	sp3	spb2	2319	2	3	19	rep1	76	41	59	43	65	47	43	46	57	0	0	0	32	37	41	0	0	0	0	0	0	0	0	0	0	0	0	0	0	0	0	0	0	0	0
HAV_5987	HAV_5987_S20_R1_001.fastq.gz	Y2019	NC310	Ames 27151	ss	LN	N	sp3	spb2	2319	2	3	19	rep2	196	119	138	89	145	137	117	115	165	0	0	0	110	121	168	0	0	0	0	0	0	0	0	0	0	0	0	0	0	0	0	0	0	0	0
HAV_5988	HAV_5988_S29_R1_001.fastq.gz	Y2019	NC310	Ames 27151	ss	LN	N	sp3	spb2	2319	2	3	19	rep3	49	0	25	11	17	27	0	41	15	0	0	0	0	13	12	0	0	0	0	0	0	0	0	0	0	0	0	0	0	0	0	0	0	0	0
HAV_5989	HAV_5989_S37_R1_001.fastq.gz	Y2019	NC364	Ames 27178	mixed	LN	N	sp3	spb2	2321	2	3	21	rep1	29	23	32	12	25	22	14	32	19	8	9	5	17	20	23	0	0	0	0	0	0	0	0	0	0	6	0	0	0	0	0	0	0	0	0
HAV_5990	HAV_5990_S65_R1_001.fastq.gz	Y2019	NC364	Ames 27178	mixed	LN	N	sp3	spb2	2321	2	3	21	rep2	79	31	44	35	33	56	58	50	53	66	44	41	47	43	63	0	0	0	0	0	0	0	0	0	0	0	0	0	0	0	32	0	0	0	0
HAV_5991	HAV_5991_S52_R1_001.fastq.gz	Y2019	NC364	Ames 27178	mixed	LN	N	sp3	spb2	2321	2	3	21	rep3	37	29	24	17	31	23	21	15	45	8	7	3	20	25	38	0	0	0	0	0	0	0	0	0	0	0	0	0	0	0	0	0	0	0	0
HAV_5992	HAV_5992_S60_R1_001.fastq.gz	Y2019	L317	NSL 65873	nss	LN	N	sp3	spb2	2324	2	3	24	rep1	25	0	14	11	40	25	9	14	19	11	2	7	20	10	14	19	11	34	20	40	24	19	17	0	26	25	27	27	19	44	0	0	0	0	0
HAV_5993	HAV_5993_S3_R1_001.fastq.gz	Y2019	L317	NSL 65873	nss	LN	N	sp3	spb2	2324	2	3	24	rep2	14	12	10	8	12	13	5	21	11	4	10	3	7	12	8	13	0	19	10	14	21	0	8	0	12	17	0	9	12	19	0	0	0	0	0
HAV_5994	HAV_5994_S12_R1_001.fastq.gz	Y2019	L317	NSL 65873	nss	LN	N	sp3	spb2	2324	2	3	24	rep3	50	19	30	24	20	26	24	38	22	0	0	0	19	24	38	0	0	0	0	0	0	0	0	0	0	0	0	0	0	0	55	0	33	0	0
HAV_5995	HAV_5995_S21_R1_001.fastq.gz	Y2019	OH40B	NSL 28966	nss	LN	N	sp3	spb2	2326	2	3	26	rep1	48	22	18	23	29	20	23	22	29	38	19	24	18	20	34	0	0	0	0	0	0	0	0	0	0	0	0	0	0	0	0	0	0	0	0
HAV_5996	HAV_5996_S30_R1_001.fastq.gz	Y2019	OH40B	NSL 28966	nss	LN	N	sp3	spb2	2326	2	3	26	rep2	42	24	20	13	18	27	22	20	26	104	68	78	26	19	20	0	0	0	0	0	0	0	0	0	0	0	0	0	0	0	0	0	67	0	0
HAV_5997	HAV_5997_S38_R1_001.fastq.gz	Y2019	OH40B	NSL 28966	nss	LN	N	sp3	spb2	2326	2	3	26	rep3	60	0	38	14	32	25	38	33	28	2	6	4	21	35	29	0	0	0	0	0	0	0	0	0	0	0	0	0	0	0	0	0	0	0	0
HAV_5998	HAV_5998_S45_R1_001.fastq.gz	Y2019	NC344	Ames 27168	nss	LN	N	sp3	spb2	2327	2	3	27	rep1	58	36	34	23	47	27	32	30	32	18	11	10	42	23	33	0	0	0	0	0	0	0	0	0	0	0	0	0	0	0	0	0	49	0	0
HAV_5999	HAV_5999_S53_R1_001.fastq.gz	Y2019	NC344	Ames 27168	nss	LN	N	sp3	spb2	2327	2	3	27	rep2	81	38	37	42	52	51	45	44	69	54	24	33	40	36	67	0	0	0	0	0	0	0	0	0	0	0	0	0	0	0	0	0	0	0	0
HAV_6000	HAV_6000_S61_R1_001.fastq.gz	Y2019	NC344	Ames 27168	nss	LN	N	sp3	spb2	2327	2	3	27	rep3	49	17	20	18	19	32	17	26	50	0	0	0	12	23	32	0	0	0	0	0	0	0	0	0	0	0	0	0	0	0	0	0	0	0	0
HAV_6001	HAV_6001_S4_R1_001.fastq.gz	Y2019	VA22	Ames 19328	nss	LN	N	sp3	spb3	2330	2	3	30	rep1	103	54	40	30	53	48	41	29	49	3	7	1	47	36	52	0	0	0	0	0	0	0	0	0	0	0	0	0	0	0	0	0	0	0	0
HAV_6002	HAV_6002_S13_R1_001.fastq.gz	Y2019	VA22	Ames 19328	nss	LN	N	sp3	spb3	2330	2	3	30	rep2	52	24	30	22	41	40	31	26	25	11	12	7	20	18	39	0	0	0	0	0	0	0	0	0	0	0	0	0	0	0	0	0	0	0	0
HAV_6003	HAV_6003_S22_R1_001.fastq.gz	Y2019	VA22	Ames 19328	nss	LN	N	sp3	spb3	2330	2	3	30	rep3	34	19	29	17	26	28	16	35	19	0	0	0	15	25	29	0	0	0	0	0	0	0	0	0	0	0	0	0	0	0	94	32	41	22	40
HAV_6004	HAV_6004_S31_R1_001.fastq.gz	Y2019	CI44	CIze 44	nss	LN	N	sp3	spb3	2331	2	3	31	rep1	115	47	78	53	81	79	73	69	94	1	2	4	53	57	112	0	0	0	0	0	0	0	0	0	0	0	0	0	0	0	63	27	46	28	33
HAV_6005	HAV_6005_S39_R1_001.fastq.gz	Y2019	CI44	CIze 44	nss	LN	N	sp3	spb3	2331	2	3	31	rep2	80	44	69	44	61	62	42	41	66	20	20	14	54	32	63	0	0	0	0	0	0	0	0	0	10	0	0	0	0	0	42	18	39	0	21
HAV_6006	HAV_6006_S46_R1_001.fastq.gz	Y2019	CI44	CIze 44	nss	LN	N	sp3	spb3	2331	2	3	31	rep3	29	22	29	14	22	20	23	34	34	0	0	0	9	24	36	0	0	0	0	0	0	0	0	0	0	0	0	0	0	0	79	34	41	16	38
HAV_6007	HAV_6007_S54_R1_001.fastq.gz	Y2019	C49	Ames 28290	nss	LN	N	sp3	spb3	2334	2	3	34	rep1	188	90	128	80	127	130	87	109	167	113	110	71	103	96	168	0	0	0	0	0	0	0	0	0	0	0	0	0	0	0	0	0	0	0	0
HAV_6008	HAV_6008_S62_R1_001.fastq.gz	Y2019	C49	Ames 28290	nss	LN	N	sp3	spb3	2334	2	3	34	rep2	21	7	5	6	14	8	5	4	9	65	60	56	6	7	17	0	0	0	0	0	0	0	0	0	0	0	0	0	0	0	90	53	58	22	62
HAV_6009	HAV_6009_S5_R1_001.fastq.gz	Y2019	C49	Ames 28290	nss	LN	N	sp3	spb3	2334	2	3	34	rep3	32	14	22	14	18	10	23	9	21	34	31	11	16	22	21	0	0	0	0	0	0	0	0	0	0	0	0	0	0	0	0	0	28	0	0
HAV_6010	HAV_6010_S14_R1_001.fastq.gz	Y2019	CI7	Ames 28367	nss	LN	N	sp3	spb3	2335	2	3	35	rep1	53	45	27	23	34	27	28	41	40	43	25	26	29	47	48	0	0	0	0	0	0	0	0	0	0	0	0	12	0	0	64	0	0	0	0
HAV_6011	HAV_6011_S23_R1_001.fastq.gz	Y2019	CI7	Ames 28367	nss	LN	N	sp3	spb3	2335	2	3	35	rep2	0	0	0	0	0	0	10	0	0	0	0	0	0	18	0	0	0	0	0	0	0	0	0	0	0	0	0	0	0	0	35	28	37	0	26
HAV_6012	HAV_6012_S32_R1_001.fastq.gz	Y2019	CI7	Ames 28367	nss	LN	N	sp3	spb3	2335	2	3	35	rep3	39	11	32	15	29	26	16	21	34	11	8	11	15	25	33	0	0	0	0	0	0	0	0	0	0	0	0	0	0	0	0	0	0	0	0
HAV_6013	HAV_6013_S40_R1_001.fastq.gz	Y2019	VA85	Ames 27193	nss	LN	N	sp3	spb3	2337	2	3	37	rep1	30	0	15	12	11	7	12	14	30	11	12	8	19	25	18	0	0	0	0	0	0	0	0	0	0	0	0	0	0	0	56	35	46	0	28
HAV_6014	HAV_6014_S47_R1_001.fastq.gz	Y2019	VA85	Ames 27193	nss	LN	N	sp3	spb3	2337	2	3	37	rep2	22	0	15	0	17	9	3	0	35	21	0	0	0	11	6	0	0	0	0	0	0	0	0	0	0	0	0	0	0	0	130	80	90	48	81
HAV_6015	HAV_6015_S55_R1_001.fastq.gz	Y2019	VA85	Ames 27193	nss	LN	N	sp3	spb3	2337	2	3	37	rep3	27	20	18	16	17	19	19	21	22	49	26	35	26	9	29	0	0	0	0	0	0	0	0	0	0	0	0	0	0	11	0	0	0	0	0
HAV_6016	HAV_6016_S63_R1_001.fastq.gz	Y2019	VA26	PI 587149	nss	LN	N	sp3	spb3	2340	2	3	40	rep1	60	34	31	24	33	34	24	41	43	9	8	2	41	34	40	0	0	0	0	0	0	0	0	0	0	0	0	0	0	0	24	21	22	0	0
HAV_6017	HAV_6017_S6_R1_001.fastq.gz	Y2019	VA26	PI 587149	nss	LN	N	sp3	spb3	2340	2	3	40	rep2	94	42	57	36	47	46	32	42	44	20	15	27	47	40	50	0	0	0	9	12	14	0	0	0	10	11	0	9	6	11	0	0	0	0	0
HAV_6018	HAV_6018_S15_R1_001.fastq.gz	Y2019	VA26	PI 587149	nss	LN	N	sp3	spb3	2340	2	3	40	rep3	20	18	19	11	19	13	9	12	12	0	0	0	14	10	23	0	0	0	0	0	0	0	0	0	0	0	0	0	0	0	16	0	21	0	0
HAV_6019	HAV_6019_S24_R1_001.fastq.gz	Y2019	33-16	Ames 26771	nss	LN	N	sp3	spb3	2341	2	3	41	rep1	21	11	7	11	12	19	10	4	15	39	20	28	8	13	14	0	0	0	0	0	0	0	0	0	0	0	0	0	0	0	0	0	0	0	0
HAV_6020	HAV_6020_S33_R1_001.fastq.gz	Y2019	33-16	Ames 26771	nss	LN	N	sp3	spb3	2341	2	3	41	rep2	44	11	27	29	16	28	24	18	34	7	5	8	21	16	27	0	0	0	0	0	0	0	0	0	0	0	0	0	0	0	0	0	49	0	0
HAV_6021	HAV_6021_S41_R1_001.fastq.gz	Y2019	33-16	Ames 26771	nss	LN	N	sp3	spb3	2341	2	3	41	rep3	180	80	138	69	124	123	96	105	167	14	7	8	99	97	147	0	0	0	0	0	0	0	0	0	0	0	0	0	0	0	0	0	0	0	0
HAV_6022	HAV_6022_S66_R1_001.fastq.gz	Y2019	CML287	PI 595565	ts	LN	N	sp4	spb1	2344	2	3	44	rep1	152	76	103	80	85	105	65	86	98	100	87	83	62	71	103	0	0	0	0	0	0	0	0	0	6	11	0	0	0	0	0	66	0	0	0
HAV_6023	HAV_6023_S56_R1_001.fastq.gz	Y2019	CML287	PI 595565	ts	LN	N	sp4	spb1	2344	2	3	44	rep2	43	16	33	23	40	42	25	22	33	16	12	12	26	29	27	0	0	10	0	0	0	0	0	0	0	0	0	0	0	0	0	0	0	0	0
HAV_6024	HAV_6024_S64_R1_001.fastq.gz	Y2019	CML287	PI 595565	ts	LN	N	sp4	spb1	2344	2	3	44	rep3	38	11	15	9	18	18	19	20	22	24	14	11	25	11	13	0	0	0	0	0	0	0	0	0	0	0	0	0	0	0	32	37	20	0	0
HAV_6025	HAV_6025_S7_R1_001.fastq.gz	Y2019	Check_B73xMo17			LN	N	sp4	spb1	2345	2	3	45	rep1	155	80	76	55	86	75	61	67	85	23	16	14	57	62	95	8	0	12	0	14	8	0	11	0	5	16	0	7	7	15	26	0	0	0	0
HAV_6026	HAV_6026_S16_R1_001.fastq.gz	Y2019	Check_B73xMo17			LN	N	sp4	spb1	2345	2	3	45	rep2	42	22	40	26	40	40	26	32	37	45	29	27	30	20	44	0	0	0	0	0	0	0	0	0	0	0	0	0	0	0	0	0	0	0	0
HAV_6027	HAV_6027_S25_R1_001.fastq.gz	Y2019	Check_B73xMo17			LN	N	sp4	spb1	2345	2	3	45	rep3	79	39	38	34	52	58	51	46	52	67	53	54	51	48	64	0	0	0	0	0	0	0	0	0	0	11	0	0	0	0	0	0	0	0	0
HAV_6028	HAV_6028_S34_R1_001.fastq.gz	Y2019	CML108	Ames 27082	ts	LN	N	sp4	spb1	2348	2	3	48	rep1	18	20	20	9	18	16	15	10	26	114	106	85	18	10	14	0	0	0	0	0	0	0	0	0	0	0	0	0	0	0	0	0	0	0	0
HAV_6029	HAV_6029_S42_R1_001.fastq.gz	Y2019	CML108	Ames 27082	ts	LN	N	sp4	spb1	2348	2	3	48	rep2	100	43	72	25	60	45	43	50	64	42	19	16	39	39	68	29	16	29	35	38	30	16	41	7	43	44	26	45	32	48	0	0	0	0	0
HAV_6030	HAV_6030_S67_R1_001.fastq.gz	Y2019	CML108	Ames 27082	ts	LN	N	sp4	spb1	2348	2	3	48	rep3	31	0	14	12	14	18	16	13	14	6	4	6	21	16	27	0	0	0	0	0	0	0	0	0	0	0	0	0	0	0	0	0	0	0	0
HAV_6031	HAV_6031_S57_R1_001.fastq.gz	Y2019	CML261	Ames 27091	ts	LN	N	sp4	spb1	2350	2	3	50	rep1	69	35	40	27	35	53	29	31	47	0	0	0	38	40	62	0	0	0	0	0	0	0	0	0	0	0	0	0	0	0	0	0	0	0	0
HAV_6032	HAV_6032_S65_R1_001.fastq.gz	Y2019	CML261	Ames 27091	ts	LN	N	sp4	spb1	2350	2	3	50	rep2	45	30	33	26	30	22	34	27	34	17	9	9	19	34	42	0	0	0	0	0	0	0	0	0	0	0	0	0	0	0	0	0	0	0	0
HAV_6033	HAV_6033_S8_R1_001.fastq.gz	Y2019	CML261	Ames 27091	ts	LN	N	sp4	spb1	2350	2	3	50	rep3	84	53	48	43	51	48	26	48	52	28	28	19	39	46	44	9	0	16	0	8	0	0	0	0	8	13	0	8	0	12	0	0	0	0	0
HAV_6034	HAV_6034_S17_R1_001.fastq.gz	Y2019	Check_B73xMo17			LN	N	sp4	spb1	2351	2	3	51	rep1	29	17	19	16	29	20	20	30	20	12	12	15	8	12	22	0	0	0	0	12	0	0	0	0	0	6	0	14	0	12	0	0	0	0	0
HAV_6035	HAV_6035_S26_R1_001.fastq.gz	Y2019	Check_B73xMo17			LN	N	sp4	spb1	2351	2	3	51	rep2	64	41	31	23	34	36	26	25	45	14	18	18	30	32	36	0	0	0	0	0	0	0	0	0	0	0	0	0	0	0	0	0	0	0	0
HAV_6036	HAV_6036_S35_R1_001.fastq.gz	Y2019	Check_B73xMo17			LN	N	sp4	spb1	2351	2	3	51	rep3	164	73	94	89	125	123	84	102	124	33	24	35	84	83	105	0	0	0	0	0	0	0	15	0	0	0	0	0	0	0	0	0	0	0	0
HAV_6037	HAV_6037_S43_R1_001.fastq.gz	Y2019	CML103	Ames 27081	ts	LN	N	sp4	spb1	2353	2	3	53	rep1	92	47	56	39	74	54	56	58	69	2	4	4	46	58	69	14	0	16	11	0	0	11	0	0	14	20	0	0	0	15	68	0	0	0	0
HAV_6039	HAV_6039_S58_R1_001.fastq.gz	Y2019	CML103	Ames 27081	ts	LN	N	sp4	spb1	2353	2	3	53	rep3	193	112	125	99	160	154	112	116	176	13	12	5	121	115	163	0	0	13	15	0	13	13	0	0	14	11	0	14	0	17	0	0	0	0	0
HAV_6040	HAV_6040_S66_R1_001.fastq.gz	Y2019	CML333	Ames 27101	ts	LN	N	sp4	spb1	2355	2	3	55	rep1	31	14	10	13	16	19	22	15	17	1	9	3	13	12	18	0	0	26	0	0	0	0	0	0	0	12	0	0	0	0	0	0	0	0	0
HAV_6041	HAV_6041_S67_R1_001.fastq.gz	Y2019	CML333	Ames 27101	ts	LN	N	sp4	spb1	2355	2	3	55	rep2	98	27	41	37	46	35	46	45	58	51	24	31	19	34	42	20	9	22	23	23	16	20	19	11	29	39	18	15	17	32	0	0	0	0	0
HAV_6042	HAV_6042_S75_R1_001.fastq.gz	Y2019	CML333	Ames 27101	ts	LN	N	sp4	spb1	2355	2	3	55	rep3	80	45	38	40	50	55	37	47	58	19	20	17	33	43	52	0	0	6	15	11	13	0	12	0	12	11	0	14	0	20	0	0	0	0	0
HAV_6043	HAV_6043_S83_R1_001.fastq.gz	Y2019	NC320	Ames 27156	ts	LN	N	sp4	spb2	2358	2	3	58	rep1	35	0	13	0	12	7	11	14	19	8	8	3	9	14	16	0	0	20	0	0	0	0	0	0	0	0	0	9	0	0	0	0	0	0	0
HAV_6044	HAV_6044_S91_R1_001.fastq.gz	Y2019	NC320	Ames 27156	ts	LN	N	sp4	spb2	2358	2	3	58	rep2	19	10	17	7	9	11	4	20	25	20	28	17	9	7	17	0	0	0	0	0	0	0	0	0	0	0	0	0	0	0	0	0	0	0	0
HAV_6045	HAV_6045_S99_R1_001.fastq.gz	Y2019	NC320	Ames 27156	ts	LN	N	sp4	spb2	2358	2	3	58	rep3	38	23	25	21	19	28	16	28	27	0	0	0	11	17	28	0	0	0	0	0	0	0	0	0	0	0	0	0	0	0	0	0	57	0	0
HAV_6046	HAV_6046_S107_R1_001.fastq.gz	Y2019	NC338	Ames 27165	ts	LN	N	sp4	spb2	2359	2	3	59	rep1	41	24	25	11	25	37	23	19	31	12	6	10	20	26	29	0	0	25	9	12	9	0	14	0	12	18	0	0	0	14	0	0	0	0	0
HAV_6047	HAV_6047_S115_R1_001.fastq.gz	Y2019	NC338	Ames 27165	ts	LN	N	sp4	spb2	2359	2	3	59	rep2	198	95	107	71	102	140	110	95	133	5	9	10	86	78	160	0	0	0	0	0	0	0	0	0	0	0	0	0	0	0	0	0	0	0	0
HAV_6048	HAV_6048_S123_R1_001.fastq.gz	Y2019	NC338	Ames 27165	ts	LN	N	sp4	spb2	2359	2	3	59	rep3	58	23	31	22	34	24	28	18	36	21	20	15	28	30	34	0	0	0	0	0	0	0	0	0	0	0	0	0	0	0	0	0	0	0	0
HAV_6049	HAV_6049_S68_R1_001.fastq.gz	Y2019	K4	NSL 30038	nss	LN	N	sp4	spb2	2362	2	3	62	rep1	54	31	39	20	39	37	20	30	40	62	53	44	23	21	43	0	0	0	0	0	0	0	0	0	0	0	0	0	0	0	0	0	0	0	0
HAV_6050	HAV_6050_S76_R1_001.fastq.gz	Y2019	K4	NSL 30038	nss	LN	N	sp4	spb2	2362	2	3	62	rep2	87	36	49	37	55	40	37	46	60	10	9	9	36	27	65	0	0	0	0	0	0	0	0	0	0	0	0	0	0	0	0	0	0	0	0
HAV_6051	HAV_6051_S84_R1_001.fastq.gz	Y2019	K4	NSL 30038	nss	LN	N	sp4	spb2	2362	2	3	62	rep3	24	10	11	8	14	12	5	14	19	35	22	28	13	7	11	0	0	0	0	0	0	0	0	0	0	0	0	0	0	0	0	0	0	0	0
HAV_6052	HAV_6052_S92_R1_001.fastq.gz	Y2019	DE811	PI 550558	mixed	LN	N	sp4	spb2	2364	2	3	64	rep1	44	21	25	16	35	32	20	27	37	108	70	78	23	20	30	0	0	17	14	10	0	0	10	0	12	13	0	12	0	22	0	0	0	0	0
HAV_6053	HAV_6053_S100_R1_001.fastq.gz	Y2019	DE811	PI 550558	mixed	LN	N	sp4	spb2	2364	2	3	64	rep2	11	4	10	4	11	11	5	4	11	27	37	17	6	5	7	0	13	16	5	18	12	5	14	0	13	14	11	12	7	15	0	0	0	0	0
HAV_6054	HAV_6054_S108_R1_001.fastq.gz	Y2019	DE811	PI 550558	mixed	LN	N	sp4	spb2	2364	2	3	64	rep3	23	19	18	17	20	14	12	17	19	5	20	11	22	20	19	14	0	9	0	0	0	0	0	0	16	2	0	0	0	7	0	0	0	0	0
HAV_6055	HAV_6055_S116_R1_001.fastq.gz	Y2019	NC296	Ames 27144	ts	LN	N	sp4	spb2	2365	2	3	65	rep1	50	23	33	14	25	28	18	19	34	23	17	16	25	13	31	8	8	9	11	12	17	0	10	0	11	28	9	20	0	10	0	0	0	0	0
HAV_6056	HAV_6056_S124_R1_001.fastq.gz	Y2019	NC296	Ames 27144	ts	LN	N	sp4	spb2	2365	2	3	65	rep2	63	31	28	24	27	46	30	40	58	51	30	37	35	32	52	0	0	0	0	0	0	0	0	0	0	0	0	0	0	0	0	0	0	0	0
HAV_6057	HAV_6057_S69_R1_001.fastq.gz	Y2019	NC296	Ames 27144	ts	LN	N	sp4	spb2	2365	2	3	65	rep3	59	35	28	18	28	37	15	27	30	40	26	22	26	21	36	7	0	5	7	7	9	0	10	0	10	10	15	11	5	9	0	0	0	0	0
HAV_6058	HAV_6058_S77_R1_001.fastq.gz	Y2019	E2558W	Ames 27110	nss	LN	N	sp4	spb2	2368	2	3	68	rep1	6	14	18	11	10	16	13	5	8	27	15	9	3	14	16	0	0	0	0	0	0	0	0	0	0	0	0	0	0	0	0	0	0	0	0
HAV_6059	HAV_6059_S85_R1_001.fastq.gz	Y2019	E2558W	Ames 27110	nss	LN	N	sp4	spb2	2368	2	3	68	rep2	0	0	0	11	0	0	0	10	0	0	25	0	0	6	8	0	0	0	0	0	0	0	0	0	0	0	0	0	0	0	0	0	0	0	0
HAV_6060	HAV_6060_S93_R1_001.fastq.gz	Y2019	E2558W	Ames 27110	nss	LN	N	sp4	spb2	2368	2	3	68	rep3	80	36	71	35	42	53	41	28	43	20	11	12	42	45	52	0	0	0	0	0	0	0	0	0	0	9	0	0	0	0	0	0	0	0	0
HAV_6061	HAV_6061_S101_R1_001.fastq.gz	Y2019	Check_B73xMo17			LN	N	sp4	spb2	2369	2	3	69	rep1	91	54	65	43	59	67	55	58	66	33	16	14	55	33	75	0	0	0	0	0	0	0	0	0	0	0	0	0	0	0	0	0	0	0	0
HAV_6062	HAV_6062_S68_R1_001.fastq.gz	Y2019	Check_B73xMo17			LN	N	sp4	spb2	2369	2	3	69	rep2	173	84	84	87	121	107	82	92	104	148	104	102	112	91	121	28	12	31	35	29	30	23	26	0	36	30	13	35	23	34	0	0	0	0	0
HAV_6063	HAV_6063_S117_R1_001.fastq.gz	Y2019	Check_B73xMo17			LN	N	sp4	spb2	2369	2	3	69	rep3	185	85	106	71	112	117	77	78	117	34	11	15	92	89	117	0	0	0	0	0	0	0	0	0	0	0	0	0	0	0	0	0	0	0	0
HAV_6064	HAV_6064_S125_R1_001.fastq.gz	Y2019	TZI18	PI 506253	ts	LN	N	sp4	spb3	2372	2	3	72	rep1	96	41	73	36	62	54	58	33	70	0	0	0	39	50	50	0	0	0	0	0	0	0	0	0	0	10	0	0	0	0	0	0	0	0	0
HAV_6065	HAV_6065_S70_R1_001.fastq.gz	Y2019	TZI18	PI 506253	ts	LN	N	sp4	spb3	2372	2	3	72	rep2	112	47	41	32	43	53	32	52	38	0	0	0	41	39	52	9	0	6	0	0	0	0	0	0	0	10	0	0	0	9	0	0	0	0	0
HAV_6066	HAV_6066_S78_R1_001.fastq.gz	Y2019	TZI18	PI 506253	ts	LN	N	sp4	spb3	2372	2	3	72	rep3	76	44	41	24	58	47	30	34	47	0	0	0	40	43	37	0	0	10	0	8	0	0	0	0	20	16	0	15	0	13	0	0	0	0	0
HAV_6067	HAV_6067_S86_R1_001.fastq.gz	Y2019	KY226	Ames 27131	mixed	LN	N	sp4	spb3	2373	2	3	73	rep1	20	16	18	14	16	25	20	17	24	55	60	46	11	18	20	0	0	13	0	13	6	0	15	0	20	17	8	16	13	21	30	0	0	0	0
HAV_6068	HAV_6068_S94_R1_001.fastq.gz	Y2019	KY226	Ames 27131	mixed	LN	N	sp4	spb3	2373	2	3	73	rep2	87	62	65	55	53	60	51	53	75	33	20	24	60	53	75	0	0	0	0	0	0	0	0	0	0	0	0	0	0	0	0	0	0	0	0
HAV_6069	HAV_6069_S102_R1_001.fastq.gz	Y2019	KY226	Ames 27131	mixed	LN	N	sp4	spb3	2373	2	3	73	rep3	13	0	7	0	0	4	0	0	24	35	0	0	0	6	6	0	0	0	0	0	0	0	0	0	0	0	0	0	0	0	0	0	0	0	0
HAV_6070	HAV_6070_S110_R1_001.fastq.gz	Y2019	H100	Ames 22748	ss	LN	N	sp4	spb3	2376	2	3	76	rep1	0	0	0	14	16	9	0	11	16	4	5	0	0	4	0	0	0	0	0	0	0	0	0	0	0	0	0	0	0	0	0	0	0	0	0
HAV_6071	HAV_6071_S118_R1_001.fastq.gz	Y2019	H100	Ames 22748	ss	LN	N	sp4	spb3	2376	2	3	76	rep2	54	21	28	22	50	34	20	34	36	17	6	7	19	38	38	0	0	0	0	0	0	0	0	0	0	0	0	0	0	0	63	0	0	0	0
HAV_6072	HAV_6072_S126_R1_001.fastq.gz	Y2019	H100	Ames 22748	ss	LN	N	sp4	spb3	2376	2	3	76	rep3	25	14	16	11	8	13	9	22	23	10	9	16	21	12	15	0	0	0	0	0	0	0	0	0	0	0	0	0	0	0	0	0	0	0	35
HAV_6073	HAV_6073_S71_R1_001.fastq.gz	Y2019	TZI11	PI 540745	ts	LN	N	sp4	spb3	2378	2	3	78	rep1	27	19	10	7	24	18	13	7	9	28	9	20	14	8	16	0	0	0	0	0	0	0	0	0	0	0	0	0	0	0	0	0	0	0	0
HAV_6074	HAV_6074_S79_R1_001.fastq.gz	Y2019	TZI11	PI 540745	ts	LN	N	sp4	spb3	2378	2	3	78	rep2	37	23	20	19	17	26	28	23	33	19	12	16	19	23	29	0	0	0	0	0	0	0	0	0	0	0	0	0	0	0	0	0	0	0	0
HAV_6075	HAV_6075_S87_R1_001.fastq.gz	Y2019	TZI11	PI 540745	ts	LN	N	sp4	spb3	2378	2	3	78	rep3	20	10	17	14	31	18	14	22	22	7	12	6	13	16	31	0	0	0	0	0	0	0	0	0	0	0	0	0	0	0	63	0	0	0	0
HAV_6076	HAV_6076_S95_R1_001.fastq.gz	Y2019	TZI25	PI 506255	mixed	LN	N	sp4	spb3	2380	2	3	80	rep1	9	2	11	5	9	8	5	4	9	88	60	59	8	8	13	0	0	0	0	0	0	0	0	0	0	0	0	0	0	0	0	0	0	0	0
HAV_6077	HAV_6077_S103_R1_001.fastq.gz	Y2019	TZI25	PI 506255	mixed	LN	N	sp4	spb3	2380	2	3	80	rep2	30	17	14	7	20	18	11	14	26	33	19	18	9	13	17	0	0	0	0	0	0	0	0	0	0	0	0	0	0	0	0	0	0	0	0
HAV_6078	HAV_6078_S111_R1_001.fastq.gz	Y2019	TZI25	PI 506255	mixed	LN	N	sp4	spb3	2380	2	3	80	rep3	24	24	20	17	27	18	19	12	25	21	18	22	16	12	27	0	0	0	0	0	0	0	0	0	0	0	0	0	0	0	0	0	0	0	0
HAV_6079	HAV_6079_S119_R1_001.fastq.gz	Y2019	Check_B73xMo17			LN	N	sp4	spb3	2382	2	3	82	rep1	0	0	0	0	21	0	23	0	0	0	0	0	0	0	0	0	0	0	0	0	0	0	0	0	0	0	0	0	0	0	27	16	30	0	13
HAV_6080	HAV_6080_S127_R1_001.fastq.gz	Y2019	Check_B73xMo17			LN	N	sp4	spb3	2382	2	3	82	rep2	60	53	41	29	46	45	27	34	48	39	30	42	42	36	44	0	0	0	0	0	0	0	0	0	0	0	0	0	0	0	36	35	25	0	25
HAV_6081	HAV_6081_S72_R1_001.fastq.gz	Y2019	Check_B73xMo17			LN	N	sp4	spb3	2382	2	3	82	rep3	0	0	0	0	0	0	0	0	0	0	0	24	0	0	0	0	0	0	0	0	0	0	0	0	0	0	0	0	0	0	155	74	90	43	73
HAV_6082	HAV_6082_S80_R1_001.fastq.gz	Y2019	NC366	Ames 27179	mixed	LN	N	sp4	spb3	2384	2	3	84	rep1	50	19	27	30	38	36	23	22	26	180	127	129	29	24	37	0	0	0	0	0	0	0	0	0	0	0	0	0	0	0	0	0	0	0	0
HAV_6083	HAV_6083_S88_R1_001.fastq.gz	Y2019	NC366	Ames 27179	mixed	LN	N	sp4	spb3	2384	2	3	84	rep2	43	14	31	25	31	42	29	30	42	110	82	65	24	23	40	0	0	0	0	0	0	0	0	0	0	0	0	0	0	0	0	0	0	0	0
HAV_6084	HAV_6084_S96_R1_001.fastq.gz	Y2019	NC366	Ames 27179	mixed	LN	N	sp4	spb3	2384	2	3	84	rep3	23	17	14	14	24	18	11	13	23	278	212	178	19	11	25	0	0	0	0	0	0	0	0	0	0	0	0	0	0	0	0	0	0	0	0
HAV_6085	HAV_6085_S104_R1_001.fastq.gz	Y2019	H91	Ames 27114	ss	LN	N	sp3	spb1	2402	2	4	02	rep1	82	43	50	32	56	76	52	50	59	58	49	47	51	38	66	0	0	0	0	0	0	0	0	0	0	0	0	0	0	0	60	32	40	18	18
HAV_6086	HAV_6086_S69_R1_001.fastq.gz	Y2019	H91	Ames 27114	ss	LN	N	sp3	spb1	2402	2	4	02	rep2	11	9	3	5	6	9	9	5	3	87	49	41	6	14	3	0	0	0	0	0	0	0	0	0	0	0	0	0	0	0	0	0	30	0	0
HAV_6087	HAV_6087_S120_R1_001.fastq.gz	Y2019	H91	Ames 27114	ss	LN	N	sp3	spb1	2402	2	4	02	rep3	145	72	98	61	83	79	68	79	91	26	25	28	68	80	118	0	0	0	0	0	0	0	0	0	0	0	0	0	0	0	0	0	0	0	0
HAV_6088	HAV_6088_S128_R1_001.fastq.gz	Y2019	4226	NSL 30904	nss	LN	N	sp3	spb1	2404	2	4	04	rep1	144	73	83	65	103	91	87	77	87	51	39	33	55	104	89	0	0	0	0	0	0	0	0	0	0	0	0	0	0	0	52	41	40	0	24
HAV_6089	HAV_6089_S70_R1_001.fastq.gz	Y2019	4226	NSL 30904	nss	LN	N	sp3	spb1	2404	2	4	04	rep2	29	0	22	15	19	25	19	29	19	0	0	0	18	14	33	0	0	0	0	0	0	0	0	0	0	0	0	0	0	0	56	0	0	0	0
HAV_6090	HAV_6090_S81_R1_001.fastq.gz	Y2019	4226	NSL 30904	nss	LN	N	sp3	spb1	2404	2	4	04	rep3	38	34	39	26	34	35	31	24	28	31	26	16	35	24	38	0	0	0	0	0	0	0	0	0	0	0	0	0	0	0	19	28	21	0	21
HAV_6091	HAV_6091_S89_R1_001.fastq.gz	Y2019	B73	PI 550473	ss	LN	N	sp3	spb1	2405	2	4	05	rep1	54	17	41	23	26	35	22	30	44	0	0	0	36	26	32	0	0	0	0	0	0	0	0	0	0	0	0	0	0	0	0	0	0	0	0
HAV_6092	HAV_6092_S97_R1_001.fastq.gz	Y2019	B73	PI 550473	ss	LN	N	sp3	spb1	2405	2	4	05	rep2	133	78	93	55	116	114	95	85	123	18	4	5	66	71	124	0	0	0	0	0	0	0	0	0	0	0	0	0	0	0	0	0	0	0	0
HAV_6093	HAV_6093_S105_R1_001.fastq.gz	Y2019	B73	PI 550473	ss	LN	N	sp3	spb1	2405	2	4	05	rep3	20	13	21	13	17	15	15	18	13	48	54	37	12	24	21	0	0	0	0	0	0	0	0	0	0	0	0	0	0	0	0	0	0	0	0
HAV_6094	HAV_6094_S113_R1_001.fastq.gz	Y2019	B77	PI 608765	nss	LN	N	sp3	spb1	2408	2	4	08	rep1	97	57	53	43	66	48	48	50	66	17	12	13	54	49	76	0	0	0	0	0	0	0	0	0	0	0	0	0	0	0	0	0	0	0	0
HAV_6095	HAV_6095_S121_R1_001.fastq.gz	Y2019	B77	PI 608765	nss	LN	N	sp3	spb1	2408	2	4	08	rep2	93	57	53	37	58	61	47	56	61	45	32	27	38	42	70	0	0	0	0	0	0	0	0	0	0	0	0	0	0	0	0	0	0	0	0
HAV_6096	HAV_6096_S129_R1_001.fastq.gz	Y2019	B77	PI 608765	nss	LN	N	sp3	spb1	2408	2	4	08	rep3	109	38	53	30	77	47	40	49	58	10	12	10	35	43	65	0	0	0	0	0	0	0	0	0	0	0	0	0	0	0	25	0	0	0	0
HAV_6097	HAV_6097_S74_R1_001.fastq.gz	Y2019	A632	PI 587140	ss	LN	N	sp3	spb1	2409	2	4	09	rep1	48	23	27	23	16	23	13	31	21	13	11	6	20	10	31	0	0	0	0	0	0	0	0	0	0	0	0	0	0	0	0	0	0	0	0
HAV_6098	HAV_6098_S82_R1_001.fastq.gz	Y2019	A632	PI 587140	ss	LN	N	sp3	spb1	2409	2	4	09	rep2	52	31	28	20	33	27	19	36	37	40	28	33	16	27	48	0	0	0	0	0	0	0	0	0	0	0	0	0	0	0	48	48	36	0	28
HAV_6099	HAV_6099_S90_R1_001.fastq.gz	Y2019	A632	PI 587140	ss	LN	N	sp3	spb1	2409	2	4	09	rep3	42	16	20	20	28	22	12	14	19	23	21	16	20	14	29	0	0	0	0	0	0	0	0	0	0	0	0	0	0	0	0	0	0	0	0
HAV_6100	HAV_6100_S98_R1_001.fastq.gz	Y2019	B2	Ames 26769	nss	LN	N	sp3	spb1	2411	2	4	11	rep1	18	16	16	11	13	15	8	16	18	121	70	76	13	13	16	0	0	0	0	0	0	0	0	0	0	0	0	0	0	0	0	0	0	0	0
HAV_6101	HAV_6101_S106_R1_001.fastq.gz	Y2019	B2	Ames 26769	nss	LN	N	sp3	spb1	2411	2	4	11	rep2	19	12	14	9	18	19	7	9	6	76	90	75	15	11	13	0	0	0	0	0	0	0	0	0	0	0	0	0	0	0	20	0	0	0	0
HAV_6102	HAV_6102_S114_R1_001.fastq.gz	Y2019	B2	Ames 26769	nss	LN	N	sp3	spb1	2411	2	4	11	rep3	73	37	41	32	34	34	36	28	42	136	70	72	35	27	38	0	0	0	0	0	0	0	0	0	0	0	0	0	0	0	71	36	39	13	27
HAV_6103	HAV_6103_S122_R1_001.fastq.gz	Y2019	CH701-30	Ames 27069	nss	LN	N	sp3	spb1	2414	2	4	14	rep1	72	46	52	35	62	55	39	48	51	31	12	12	45	50	72	0	0	0	0	0	0	0	0	0	0	0	0	0	0	0	54	22	20	19	15
HAV_6104	HAV_6104_S130_R1_001.fastq.gz	Y2019	CH701-30	Ames 27069	nss	LN	N	sp3	spb1	2414	2	4	14	rep2	17	6	14	9	18	8	8	14	17	36	40	28	7	10	23	0	0	0	0	0	0	0	0	0	0	0	0	0	0	0	0	0	0	0	0
HAV_6105	HAV_6105_S1_R1_001.fastq.gz	Y2019	CH701-30	Ames 27069	nss	LN	N	sp3	spb1	2414	2	4	14	rep3	78	35	47	33	41	46	39	49	51	86	68	60	32	31	53	0	0	0	0	0	0	0	0	0	0	0	0	0	0	0	0	0	0	0	0
HAV_6106	HAV_6106_S10_R1_001.fastq.gz	Y2019	OS420	NSL 65874	nss	LN	N	sp3	spb2	2416	2	4	16	rep1	19	8	13	7	13	15	16	12	10	27	13	15	10	13	14	0	0	0	0	0	0	0	0	0	0	0	0	0	0	0	92	0	0	0	0
HAV_6107	HAV_6107_S19_R1_001.fastq.gz	Y2019	OS420	NSL 65874	nss	LN	N	sp3	spb2	2416	2	4	16	rep2	23	17	19	16	26	13	7	15	14	55	34	41	22	13	21	0	0	0	0	0	0	0	0	0	0	0	0	0	0	0	0	0	0	0	0
HAV_6108	HAV_6108_S28_R1_001.fastq.gz	Y2019	OS420	NSL 65874	nss	LN	N	sp3	spb2	2416	2	4	16	rep3	74	39	35	24	49	45	40	37	51	33	29	23	32	40	47	0	0	0	0	0	0	0	0	0	0	0	0	0	0	0	0	0	0	0	0
HAV_6109	HAV_6109_S37_R1_001.fastq.gz	Y2019	PA880	PI 517974	nss	LN	N	sp3	spb2	2417	2	4	17	rep1	38	10	29	22	27	24	23	38	28	0	0	0	35	26	32	0	0	0	0	0	0	0	0	0	0	0	0	0	0	0	48	30	23	11	21
HAV_6110	HAV_6110_S71_R1_001.fastq.gz	Y2019	PA880	PI 517974	nss	LN	N	sp3	spb2	2417	2	4	17	rep2	62	26	41	35	45	36	36	30	53	32	22	18	32	34	51	0	0	0	0	0	0	0	0	0	0	0	0	0	0	0	0	0	37	0	0
HAV_6111	HAV_6111_S53_R1_001.fastq.gz	Y2019	PA880	PI 517974	nss	LN	N	sp3	spb2	2417	2	4	17	rep3	22	8	10	11	15	15	14	12	15	30	31	28	11	14	17	0	0	0	0	0	0	0	0	0	7	0	0	0	0	8	0	0	0	0	0
HAV_6112	HAV_6112_S61_R1_001.fastq.gz	Y2019	MO44	Ames 28939	nss	LN	N	sp3	spb2	2419	2	4	19	rep1	38	30	20	28	36	28	29	36	33	69	42	52	24	24	34	0	0	0	0	0	0	0	0	0	0	0	0	0	0	0	53	0	0	0	0
HAV_6113	HAV_6113_S2_R1_001.fastq.gz	Y2019	MO44	Ames 28939	nss	LN	N	sp3	spb2	2419	2	4	19	rep2	43	18	27	20	35	28	23	18	30	37	32	23	17	24	41	0	0	0	0	0	0	0	0	0	0	0	0	0	0	0	163	85	92	44	56
HAV_6114	HAV_6114_S72_R1_001.fastq.gz	Y2019	MO44	Ames 28939	nss	LN	N	sp3	spb2	2419	2	4	19	rep3	51	26	39	22	34	27	23	39	45	8	5	5	31	26	42	0	0	0	0	0	0	0	0	0	0	0	0	0	0	0	0	0	0	0	0
HAV_6115	HAV_6115_S20_R1_001.fastq.gz	Y2019	NC326	Ames 27159	ss	LN	N	sp3	spb2	2422	2	4	22	rep1	80	50	62	56	71	57	58	43	55	48	36	39	49	58	79	0	0	0	0	0	0	0	0	0	0	0	0	0	0	0	0	0	0	0	0
HAV_6116	HAV_6116_S29_R1_001.fastq.gz	Y2019	NC326	Ames 27159	ss	LN	N	sp3	spb2	2422	2	4	22	rep2	35	21	40	23	15	25	28	21	30	4	8	3	18	20	23	0	0	0	0	0	0	0	0	0	0	0	0	0	0	0	0	0	0	0	0
HAV_6117	HAV_6117_S38_R1_001.fastq.gz	Y2019	NC326	Ames 27159	ss	LN	N	sp3	spb2	2422	2	4	22	rep3	98	58	64	47	62	81	43	58	77	51	43	26	56	54	54	0	0	0	0	0	0	0	0	0	0	0	0	0	0	0	0	0	0	0	0
HAV_6118	HAV_6118_S73_R1_001.fastq.gz	Y2019	NC294	Ames 27143	ss	LN	N	sp3	spb2	2424	2	4	24	rep1	45	35	37	28	36	36	23	40	41	38	32	29	27	33	33	0	0	0	0	0	0	0	0	0	0	0	0	0	0	0	0	0	0	0	0
HAV_6119	HAV_6119_S54_R1_001.fastq.gz	Y2019	NC294	Ames 27143	ss	LN	N	sp3	spb2	2424	2	4	24	rep2	28	0	24	0	10	16	11	18	14	6	5	3	5	6	15	0	0	0	0	0	0	0	0	0	0	0	0	0	0	0	0	0	0	0	0
HAV_6120	HAV_6120_S62_R1_001.fastq.gz	Y2019	NC294	Ames 27143	ss	LN	N	sp3	spb2	2424	2	4	24	rep3	33	11	16	13	16	21	17	21	21	7	17	10	12	17	22	0	0	0	0	0	0	0	0	0	0	0	0	0	0	0	41	33	24	0	0
HAV_6121	HAV_6121_S3_R1_001.fastq.gz	Y2019	NC328	Ames 27160	ss	LN	N	sp3	spb2	2425	2	4	25	rep1	20	13	12	11	14	14	10	14	12	81	55	58	6	12	14	0	0	0	0	0	0	0	0	0	0	0	0	0	0	0	37	19	25	0	12
HAV_6122	HAV_6122_S12_R1_001.fastq.gz	Y2019	NC328	Ames 27160	ss	LN	N	sp3	spb2	2425	2	4	25	rep2	30	17	15	13	28	18	13	30	24	9	10	3	15	13	30	0	0	0	0	0	0	0	0	0	0	0	0	0	0	0	0	0	0	0	0
HAV_6123	HAV_6123_S21_R1_001.fastq.gz	Y2019	NC328	Ames 27160	ss	LN	N	sp3	spb2	2425	2	4	25	rep3	21	8	7	7	13	11	4	13	11	22	19	21	16	8	7	0	0	0	0	0	0	0	0	0	0	0	0	0	0	0	0	0	0	0	0
HAV_6124	HAV_6124_S30_R1_001.fastq.gz	Y2019	IL14H	Ames 27118	sweet	LN	N	sp3	spb2	2428	2	4	28	rep1	13	8	2	12	10	5	7	12	17	127	103	88	6	3	14	0	0	0	0	0	0	0	0	0	0	0	0	0	0	0	14	12	21	0	0
HAV_6125	HAV_6125_S39_R1_001.fastq.gz	Y2019	IL14H	Ames 27118	sweet	LN	N	sp3	spb2	2428	2	4	28	rep2	52	28	29	33	33	43	27	37	31	51	53	44	26	30	43	0	0	0	0	0	0	0	0	0	0	0	0	0	0	0	0	0	0	0	0
HAV_6126	HAV_6126_S47_R1_001.fastq.gz	Y2019	IL14H	Ames 27118	sweet	LN	N	sp3	spb2	2428	2	4	28	rep3	45	21	35	18	44	34	30	34	56	35	18	15	25	26	36	0	0	0	0	0	0	0	0	0	0	0	0	0	0	0	0	0	0	0	0
HAV_6127	HAV_6127_S55_R1_001.fastq.gz	Y2019	WF9	Ames 19293	nss	LN	N	sp3	spb3	2430	2	4	30	rep1	145	71	91	64	95	89	61	63	100	0	0	0	57	59	115	0	0	0	0	0	0	0	0	0	0	0	0	0	0	0	53	0	0	0	0
HAV_6128	HAV_6128_S63_R1_001.fastq.gz	Y2019	WF9	Ames 19293	nss	LN	N	sp3	spb3	2430	2	4	30	rep2	32	0	27	17	21	28	13	35	49	0	0	0	29	14	21	0	0	0	0	0	0	0	0	0	0	0	0	0	0	0	0	0	0	0	0
HAV_6129	HAV_6129_S4_R1_001.fastq.gz	Y2019	WF9	Ames 19293	nss	LN	N	sp3	spb3	2430	2	4	30	rep3	24	17	19	15	23	18	10	33	30	0	0	0	16	17	27	0	0	0	0	0	0	0	0	0	0	0	0	0	0	0	0	0	0	0	0
HAV_6130	HAV_6130_S13_R1_001.fastq.gz	Y2019	A214N	Ames 31536	mixed	LN	N	sp3	spb3	2431	2	4	31	rep1	50	27	25	21	31	27	19	38	35	0	0	0	29	17	45	0	0	0	0	0	0	0	0	0	0	0	0	0	0	0	0	0	0	0	0
HAV_6131	HAV_6131_S22_R1_001.fastq.gz	Y2019	A214N	Ames 31536	mixed	LN	N	sp3	spb3	2431	2	4	31	rep2	31	20	35	13	19	29	34	35	22	0	0	0	24	24	31	0	0	0	0	0	0	0	0	0	0	0	0	0	0	0	0	0	0	0	0
HAV_6132	HAV_6132_S31_R1_001.fastq.gz	Y2019	A214N	Ames 31536	mixed	LN	N	sp3	spb3	2431	2	4	31	rep3	62	18	31	29	49	31	22	31	51	0	0	0	23	31	51	0	0	0	0	0	0	0	0	0	0	0	0	0	0	0	0	0	56	0	0
HAV_6133	HAV_6133_S40_R1_001.fastq.gz	Y2019	796	Ames 27196	mixed	LN	N	sp3	spb3	2433	2	4	33	rep1	45	34	35	27	44	36	30	29	36	8	1	2	27	31	49	10	0	14	0	0	0	0	0	0	17	15	0	13	0	0	0	0	23	0	0
HAV_6134	HAV_6134_S74_R1_001.fastq.gz	Y2019	796	Ames 27196	mixed	LN	N	sp3	spb3	2433	2	4	33	rep2	54	0	22	21	27	30	21	32	25	0	0	0	22	27	46	0	0	0	0	0	0	0	0	0	11	0	0	0	0	0	0	0	0	0	0
HAV_6135	HAV_6135_S56_R1_001.fastq.gz	Y2019	796	Ames 27196	mixed	LN	N	sp3	spb3	2433	2	4	33	rep3	136	56	76	36	73	54	66	70	82	29	22	16	62	60	76	0	0	6	0	0	10	0	0	0	0	11	12	9	0	16	0	0	0	0	0
HAV_6136	HAV_6136_S64_R1_001.fastq.gz	Y2019	38-11	Ames 31535	nss	LN	N	sp3	spb3	2435	2	4	35	rep1	21	9	15	8	23	15	10	16	6	36	29	28	8	9	14	0	0	0	0	0	0	0	0	0	0	0	0	0	0	0	0	0	0	0	0
HAV_6137	HAV_6137_S5_R1_001.fastq.gz	Y2019	38-11	Ames 31535	nss	LN	N	sp3	spb3	2435	2	4	35	rep2	39	13	29	12	32	19	15	19	21	24	15	9	25	23	30	0	0	0	0	0	0	0	0	0	0	0	0	0	0	0	0	0	0	0	0
HAV_6138	HAV_6138_S14_R1_001.fastq.gz	Y2019	38-11	Ames 31535	nss	LN	N	sp3	spb3	2435	2	4	35	rep3	21	11	17	10	14	13	13	13	25	88	83	45	18	5	19	0	0	0	0	0	0	0	0	0	0	0	0	0	0	0	0	0	0	0	0
HAV_6139	HAV_6139_S23_R1_001.fastq.gz	Y2019	T8	PI 550518	nss	LN	N	sp3	spb3	2438	2	4	38	rep1	50	25	37	14	21	23	19	33	24	0	0	0	15	21	27	0	0	0	0	0	0	0	0	0	0	0	0	0	0	0	0	0	42	0	0
HAV_6140	HAV_6140_S32_R1_001.fastq.gz	Y2019	T8	PI 550518	nss	LN	N	sp3	spb3	2438	2	4	38	rep2	34	0	18	14	24	16	26	27	20	21	20	9	15	18	29	0	0	0	0	0	0	0	0	0	0	0	0	0	0	0	0	0	0	0	0
HAV_6141	HAV_6141_S41_R1_001.fastq.gz	Y2019	T8	PI 550518	nss	LN	N	sp3	spb3	2438	2	4	38	rep3	49	20	23	15	21	26	21	30	23	7	9	5	17	20	28	0	0	0	0	0	0	0	0	0	0	0	0	0	0	0	0	0	0	0	0
HAV_6142	HAV_6142_S75_R1_001.fastq.gz	Y2019	SD40	PI 606768	mixed	LN	N	sp3	spb3	2440	2	4	40	rep1	115	60	66	68	92	96	68	65	91	78	66	42	61	81	116	14	0	27	19	15	15	10	15	0	25	18	0	19	0	22	0	0	0	0	0
HAV_6143	HAV_6143_S57_R1_001.fastq.gz	Y2019	SD40	PI 606768	mixed	LN	N	sp3	spb3	2440	2	4	40	rep2	65	26	37	25	49	43	30	35	46	15	10	9	34	46	42	0	0	0	0	0	0	0	0	0	0	0	0	0	0	12	0	0	0	0	0
HAV_6144	HAV_6144_S65_R1_001.fastq.gz	Y2019	SD40	PI 606768	mixed	LN	N	sp3	spb3	2440	2	4	40	rep3	54	30	39	19	19	37	27	23	29	14	17	19	22	24	34	0	0	0	0	0	0	0	0	0	0	0	0	0	0	0	0	0	0	0	0
HAV_6145	HAV_6145_S6_R1_001.fastq.gz	Y2019	VA99	Ames 24989	nss	LN	N	sp3	spb3	2441	2	4	41	rep1	78	45	65	45	43	60	39	58	59	18	15	17	54	37	55	6	0	0	13	0	0	0	0	0	0	13	0	11	13	14	0	0	0	0	0
HAV_6146	HAV_6146_S15_R1_001.fastq.gz	Y2019	VA99	Ames 24989	nss	LN	N	sp3	spb3	2441	2	4	41	rep2	29	16	22	18	24	23	12	28	24	9	15	4	12	21	21	0	0	0	0	0	6	0	0	0	10	0	0	0	0	0	0	0	0	0	0
HAV_6147	HAV_6147_S24_R1_001.fastq.gz	Y2019	VA99	Ames 24989	nss	LN	N	sp3	spb3	2441	2	4	41	rep3	68	22	40	21	30	38	28	24	44	10	3	1	30	41	42	0	0	0	0	0	0	0	0	0	0	0	0	0	0	0	0	0	0	0	0
HAV_6148	HAV_6148_S33_R1_001.fastq.gz	Y2019	Check_B73xMo17			LN	N	sp4	spb1	2443	2	4	43	rep1	72	33	30	21	39	56	42	45	56	7	3	4	31	32	44	0	0	0	0	0	0	0	0	0	0	0	0	0	0	0	0	0	0	0	0
HAV_6149	HAV_6149_S42_R1_001.fastq.gz	Y2019	Check_B73xMo17			LN	N	sp4	spb1	2443	2	4	43	rep2	15	14	12	12	31	19	16	13	8	8	4	3	17	20	11	0	0	0	0	0	0	0	0	0	0	0	0	0	0	0	0	0	0	0	0
HAV_6150	HAV_6150_S50_R1_001.fastq.gz	Y2019	Check_B73xMo17			LN	N	sp4	spb1	2443	2	4	43	rep3	27	19	25	22	26	21	25	22	30	0	0	0	19	25	29	0	0	0	0	0	0	0	0	0	0	0	0	0	0	0	0	0	0	0	0
HAV_6151	HAV_6151_S58_R1_001.fastq.gz	Y2019	Check_B73xMo17			LN	N	sp4	spb1	2446	2	4	46	rep1	16	8	17	12	8	9	10	13	15	36	24	25	9	9	18	0	0	0	0	0	0	0	0	0	10	0	0	9	0	10	0	0	0	0	0
HAV_6152	HAV_6152_S66_R1_001.fastq.gz	Y2019	Check_B73xMo17			LN	N	sp4	spb1	2446	2	4	46	rep2	76	31	52	43	49	53	40	58	54	0	0	0	31	37	58	0	0	0	0	0	0	0	0	0	0	0	0	0	0	0	0	0	0	0	0
HAV_6153	HAV_6153_S7_R1_001.fastq.gz	Y2019	Check_B73xMo17			LN	N	sp4	spb1	2446	2	4	46	rep3	42	20	35	21	36	34	23	31	49	0	0	0	22	27	34	0	0	0	0	0	0	0	0	0	0	0	0	0	0	0	0	0	0	0	0
HAV_6154	HAV_6154_S16_R1_001.fastq.gz	Y2019	Check_B73xMo17			LN	N	sp4	spb1	2448	2	4	48	rep1	32	27	27	19	19	29	18	25	38	21	24	16	12	22	30	0	0	0	0	0	0	0	0	0	0	0	0	0	0	0	0	0	0	0	0
HAV_6155	HAV_6155_S25_R1_001.fastq.gz	Y2019	Check_B73xMo17			LN	N	sp4	spb1	2448	2	4	48	rep2	44	14	26	24	28	29	27	18	39	3	1	4	37	36	34	0	0	0	0	0	0	0	0	0	0	0	0	0	0	0	0	0	0	0	0
HAV_6156	HAV_6156_S34_R1_001.fastq.gz	Y2019	Check_B73xMo17			LN	N	sp4	spb1	2448	2	4	48	rep3	66	28	41	33	32	47	30	40	37	4	7	7	29	33	44	0	0	0	0	0	0	0	0	0	0	0	0	0	0	0	0	0	0	0	0
HAV_6157	HAV_6157_S43_R1_001.fastq.gz	Y2019	CML218	Ames 27086	mixed	LN	N	sp4	spb1	2449	2	4	49	rep1	85	45	50	50	63	47	43	63	62	40	34	31	38	45	80	0	0	0	0	0	0	0	0	0	0	0	0	0	0	0	0	0	0	0	0
HAV_6158	HAV_6158_S76_R1_001.fastq.gz	Y2019	CML218	Ames 27086	mixed	LN	N	sp4	spb1	2449	2	4	49	rep2	101	59	88	52	79	62	54	58	83	228	174	164	50	52	78	0	0	0	0	0	0	0	0	0	0	0	0	0	0	0	0	0	0	0	0
HAV_6159	HAV_6159_S59_R1_001.fastq.gz	Y2019	CML218	Ames 27086	mixed	LN	N	sp4	spb1	2449	2	4	49	rep3	25	7	12	10	15	12	7	8	15	77	57	61	10	12	15	0	0	0	0	0	0	0	0	0	0	0	0	0	0	0	0	0	0	0	0
HAV_6160	HAV_6160_S67_R1_001.fastq.gz	Y2019	CML52	PI 595561	ts	LN	N	sp4	spb1	2452	2	4	52	rep1	40	15	24	19	24	26	26	18	37	59	42	51	18	21	23	0	0	0	0	0	0	0	0	0	0	0	0	0	0	0	27	17	20	0	0
HAV_6161	HAV_6161_S8_R1_001.fastq.gz	Y2019	CML52	PI 595561	ts	LN	N	sp4	spb1	2452	2	4	52	rep2	53	20	30	25	42	29	36	28	40	8	15	5	20	28	38	0	0	0	0	0	0	0	0	0	0	0	0	0	0	0	0	0	0	0	0
HAV_6162	HAV_6162_S17_R1_001.fastq.gz	Y2019	CML52	PI 595561	ts	LN	N	sp4	spb1	2452	2	4	52	rep3	76	37	41	28	43	46	35	43	60	0	0	0	42	36	62	0	0	0	0	0	7	0	0	0	10	0	0	0	0	0	38	0	0	0	0
HAV_6163	HAV_6163_S26_R1_001.fastq.gz	Y2019	CML254	PI 595542	ts	LN	N	sp4	spb1	2453	2	4	53	rep1	210	82	150	112	149	139	99	116	170	0	0	0	103	134	163	0	0	0	0	0	0	0	0	0	0	0	0	0	0	0	0	0	0	0	0
HAV_6164	HAV_6164_S35_R1_001.fastq.gz	Y2019	CML254	PI 595542	ts	LN	N	sp4	spb1	2453	2	4	53	rep2	200	88	123	96	129	130	124	128	159	0	0	0	105	106	184	0	0	0	0	0	0	0	0	0	0	0	0	0	0	0	0	0	0	0	0
HAV_6165	HAV_6165_S44_R1_001.fastq.gz	Y2019	CML254	PI 595542	ts	LN	N	sp4	spb1	2453	2	4	53	rep3	232	101	142	101	146	115	91	121	164	0	0	0	105	104	154	0	0	0	0	0	0	0	0	0	0	0	0	0	0	0	0	0	0	0	0
HAV_6166	HAV_6166_S77_R1_001.fastq.gz	Y2019	38-11	Ames 26604	nss	LN	N	sp4	spb1	2455	2	4	55	rep1	323	159	202	168	256	232	197	216	271	10	6	3	199	200	268	25	19	32	27	40	25	29	37	0	62	39	22	34	26	44	0	0	38	0	0
HAV_6167	HAV_6167_S60_R1_001.fastq.gz	Y2019	38-11	Ames 26604	nss	LN	N	sp4	spb1	2455	2	4	55	rep2	70	31	58	24	43	51	41	35	40	0	0	0	46	29	39	0	0	0	0	0	0	0	0	0	0	0	0	0	0	0	0	0	0	0	0
HAV_6168	HAV_6168_S68_R1_001.fastq.gz	Y2019	38-11	Ames 26604	nss	LN	N	sp4	spb1	2455	2	4	55	rep3	19	10	6	8	12	5	5	21	14	12	18	8	12	10	15	0	0	0	0	0	0	0	0	0	0	0	0	0	0	0	0	0	0	0	0
HAV_6169	HAV_6169_S69_R1_001.fastq.gz	Y2019	M162W	Ames 27134	nss	LN	N	sp4	spb2	2457	2	4	57	rep1	30	20	23	19	21	20	17	20	24	97	64	74	10	20	19	0	0	0	0	0	0	0	0	0	0	0	0	0	0	0	0	0	0	0	0
HAV_6170	HAV_6170_S77_R1_001.fastq.gz	Y2019	M162W	Ames 27134	nss	LN	N	sp4	spb2	2457	2	4	57	rep2	442	240	285	191	295	287	226	232	302	11	12	10	220	249	315	0	0	0	0	0	0	0	0	0	0	0	0	0	0	0	0	0	0	0	0
HAV_6171	HAV_6171_S85_R1_001.fastq.gz	Y2019	M162W	Ames 27134	nss	LN	N	sp4	spb2	2457	2	4	57	rep3	71	42	46	34	52	44	44	30	63	118	115	110	30	45	69	0	0	0	0	0	0	0	0	0	0	0	0	0	0	0	43	0	29	0	0
HAV_6172	HAV_6172_S93_R1_001.fastq.gz	Y2019	GA209	Ames 10248	nss	LN	N	sp4	spb2	2460	2	4	60	rep1	39	14	32	11	20	32	16	24	34	8	10	19	14	18	26	0	0	0	0	0	0	0	0	0	0	0	0	0	0	0	0	0	0	0	0
HAV_6173	HAV_6173_S101_R1_001.fastq.gz	Y2019	GA209	Ames 10248	nss	LN	N	sp4	spb2	2460	2	4	60	rep2	78	35	51	41	43	50	36	42	46	14	5	10	35	35	38	10	0	20	0	11	11	0	9	0	18	18	0	16	9	18	0	0	0	0	0
HAV_6174	HAV_6174_S109_R1_001.fastq.gz	Y2019	GA209	Ames 10248	nss	LN	N	sp4	spb2	2460	2	4	60	rep3	0	0	0	0	0	0	0	0	0	0	0	0	0	0	0	0	0	0	0	0	0	0	0	0	0	0	0	0	0	0	0	0	0	0	0
HAV_6175	HAV_6175_S117_R1_001.fastq.gz	Y2019	NC318	Ames 27155	ts	LN	N	sp4	spb2	2461	2	4	61	rep1	196	102	107	81	105	106	94	81	118	95	106	73	79	86	127	0	0	0	0	0	5	0	0	0	0	0	0	0	0	0	0	0	0	0	0
HAV_6176	HAV_6176_S125_R1_001.fastq.gz	Y2019	NC318	Ames 27155	ts	LN	N	sp4	spb2	2461	2	4	61	rep2	170	78	115	75	133	94	80	71	133	35	17	17	82	78	126	0	0	6	0	14	0	5	0	0	10	16	0	13	0	17	0	0	0	0	0
HAV_6177	HAV_6177_S70_R1_001.fastq.gz	Y2019	NC318	Ames 27155	ts	LN	N	sp4	spb2	2461	2	4	61	rep3	124	75	79	69	93	78	66	69	109	64	53	44	75	44	97	0	0	0	0	0	0	0	0	0	0	0	0	13	13	14	0	0	0	0	0
HAV_6178	HAV_6178_S78_R1_001.fastq.gz	Y2019	CML69	Ames 28184	ts	LN	N	sp4	spb2	2463	2	4	63	rep1	54	22	42	30	49	27	21	36	51	46	31	33	26	30	35	0	0	0	0	0	14	0	0	0	7	0	0	0	0	9	0	0	0	0	0
HAV_6179	HAV_6179_S86_R1_001.fastq.gz	Y2019	CML69	Ames 28184	ts	LN	N	sp4	spb2	2463	2	4	63	rep2	46	25	21	16	35	34	27	22	24	165	151	119	15	29	24	0	0	0	0	0	0	0	0	0	0	0	0	0	0	0	0	0	0	0	0
HAV_6180	HAV_6180_S94_R1_001.fastq.gz	Y2019	CML69	Ames 28184	ts	LN	N	sp4	spb2	2463	2	4	63	rep3	95	49	52	46	59	59	54	52	70	35	30	22	56	45	73	9	13	14	16	14	24	9	15	0	25	14	7	30	12	30	0	0	0	0	0
HAV_6181	HAV_6181_S102_R1_001.fastq.gz	Y2019	MO24W	PI 587144	mixed	LN	N	sp4	spb2	2466	2	4	66	rep1	108	46	69	50	80	78	59	66	78	0	0	0	51	59	68	16	6	15	6	13	14	12	15	0	23	20	9	21	17	17	0	0	0	0	0
HAV_6182	HAV_6182_S110_R1_001.fastq.gz	Y2019	MO24W	PI 587144	mixed	LN	N	sp4	spb2	2466	2	4	66	rep2	28	17	13	14	19	13	11	18	20	15	3	11	7	9	20	0	0	0	0	0	0	0	0	0	0	9	0	10	0	0	0	0	0	0	0
HAV_6183	HAV_6183_S118_R1_001.fastq.gz	Y2019	MO24W	PI 587144	mixed	LN	N	sp4	spb2	2466	2	4	66	rep3	36	21	32	15	26	21	16	28	26	17	6	14	27	13	38	0	0	0	0	0	0	0	0	0	0	0	0	0	0	0	44	0	30	0	19
HAV_6184	HAV_6184_S126_R1_001.fastq.gz	Y2019	Check_B73xMo17			LN	N	sp4	spb2	2468	2	4	68	rep1	29	0	26	8	30	19	17	12	24	24	14	7	13	14	34	0	0	0	0	0	0	0	0	0	0	0	0	0	0	0	0	0	0	0	0
HAV_6185	HAV_6185_S71_R1_001.fastq.gz	Y2019	Check_B73xMo17			LN	N	sp4	spb2	2468	2	4	68	rep2	125	60	79	47	60	88	55	65	92	20	19	12	56	63	76	0	0	0	0	0	0	0	0	0	0	0	0	0	0	0	44	34	34	24	20
HAV_6186	HAV_6186_S79_R1_001.fastq.gz	Y2019	Check_B73xMo17			LN	N	sp4	spb2	2468	2	4	68	rep3	98	47	49	43	63	70	54	40	58	185	146	129	39	45	85	16	0	31	12	13	19	0	11	0	31	28	13	28	12	21	0	43	0	0	0
HAV_6187	HAV_6187_S87_R1_001.fastq.gz	Y2019	K64	Ames 27121	nss	LN	N	sp4	spb2	2470	2	4	70	rep1	50	24	32	19	37	33	23	31	46	61	45	51	27	35	56	0	0	0	0	0	0	0	0	0	0	0	0	0	0	0	0	0	0	0	0
HAV_6188	HAV_6188_S95_R1_001.fastq.gz	Y2019	K64	Ames 27121	nss	LN	N	sp4	spb2	2470	2	4	70	rep2	168	57	72	56	102	96	72	72	116	29	33	27	75	67	100	0	0	0	0	0	0	0	0	0	0	0	0	0	0	0	0	0	0	0	0
HAV_6189	HAV_6189_S103_R1_001.fastq.gz	Y2019	K64	Ames 27121	nss	LN	N	sp4	spb2	2470	2	4	70	rep3	152	101	100	70	104	116	100	102	112	88	71	70	82	92	118	0	0	0	0	0	0	0	0	0	0	0	0	0	0	0	28	15	33	0	0
HAV_6190	HAV_6190_S111_R1_001.fastq.gz	Y2019	T232	PI 550522	mixed	LN	N	sp4	spb3	2472	2	4	72	rep1	55	27	28	15	21	31	21	30	29	30	16	20	20	21	34	0	0	0	0	0	0	0	3	0	0	0	0	0	0	8	0	0	0	0	0
HAV_6191	HAV_6191_S119_R1_001.fastq.gz	Y2019	T232	PI 550522	mixed	LN	N	sp4	spb3	2472	2	4	72	rep2	42	21	25	15	27	30	29	27	30	51	53	48	18	21	28	0	0	0	0	0	0	0	0	0	0	0	0	0	0	0	0	0	0	0	0
HAV_6192	HAV_6192_S127_R1_001.fastq.gz	Y2019	T232	PI 550522	mixed	LN	N	sp4	spb3	2472	2	4	72	rep3	95	52	46	41	64	67	55	61	60	281	198	184	43	56	66	0	0	0	0	0	0	0	0	0	17	0	0	16	0	13	41	0	0	0	0
HAV_6193	HAV_6193_S72_R1_001.fastq.gz	Y2019	SC55	Ames 27189	mixed	LN	N	sp4	spb3	2474	2	4	74	rep1	164	92	115	77	127	113	85	109	129	40	52	33	99	82	128	0	0	0	0	0	0	0	9	0	13	10	0	14	0	10	65	0	0	0	0
HAV_6194	HAV_6194_S80_R1_001.fastq.gz	Y2019	SC55	Ames 27189	mixed	LN	N	sp4	spb3	2474	2	4	74	rep2	567	269	337	204	339	317	259	251	391	57	40	42	242	228	351	12	0	23	16	0	10	0	12	0	22	11	0	12	7	7	26	27	21	0	0
HAV_6195	HAV_6195_S88_R1_001.fastq.gz	Y2019	SC55	Ames 27189	mixed	LN	N	sp4	spb3	2474	2	4	74	rep3	252	145	178	146	170	175	134	155	160	178	117	109	124	152	213	0	0	0	0	0	0	0	0	0	0	0	0	11	0	0	34	22	20	0	0
HAV_6196	HAV_6196_S96_R1_001.fastq.gz	Y2019	TX601	Ames 22763	ts	LN	N	sp4	spb3	2476	2	4	76	rep1	64	31	37	26	45	40	26	31	37	74	58	51	26	33	47	0	0	10	0	0	0	0	0	0	0	7	0	11	0	9	74	0	0	0	0
HAV_6197	HAV_6197_S104_R1_001.fastq.gz	Y2019	TX601	Ames 22763	ts	LN	N	sp4	spb3	2476	2	4	76	rep2	116	44	61	56	76	58	45	42	69	64	34	47	51	45	85	20	13	24	0	22	13	7	9	0	18	28	18	23	19	25	0	0	0	0	0
HAV_6198	HAV_6198_S112_R1_001.fastq.gz	Y2019	TX601	Ames 22763	ts	LN	N	sp4	spb3	2476	2	4	76	rep3	47	23	30	16	26	40	21	31	38	18	8	5	37	15	37	0	0	0	0	0	0	0	0	0	0	0	0	0	0	0	0	0	0	0	0
HAV_6199	HAV_6199_S120_R1_001.fastq.gz	Y2019	F2	PI 257506	mixed	LN	N	sp4	spb3	2478	2	4	78	rep1	167	113	111	91	112	116	83	94	134	37	17	10	81	88	124	0	0	0	0	0	0	0	0	0	0	0	0	0	0	0	38	29	42	0	17
HAV_6200	HAV_6200_S128_R1_001.fastq.gz	Y2019	F2	PI 257506	mixed	LN	N	sp4	spb3	2478	2	4	78	rep2	216	130	130	94	173	140	101	135	158	35	32	16	103	103	164	0	0	0	0	0	0	0	0	0	0	0	0	0	0	0	115	73	79	32	45
HAV_6201	HAV_6201_S73_R1_001.fastq.gz	Y2019	F2	PI 257506	mixed	LN	N	sp4	spb3	2478	2	4	78	rep3	268	139	167	132	178	185	125	146	205	35	28	22	120	152	211	0	0	0	0	0	0	0	0	0	0	0	0	0	0	0	33	0	0	0	0
HAV_6202	HAV_6202_S81_R1_001.fastq.gz	Y2019	DE2	PI 606330	nss	LN	N	sp4	spb3	2480	2	4	80	rep1	80	31	46	30	45	41	31	44	42	314	236	209	31	28	56	0	0	0	0	0	0	0	0	0	0	0	0	10	0	0	0	0	0	0	0
HAV_6203	HAV_6203_S89_R1_001.fastq.gz	Y2019	DE2	PI 606330	nss	LN	N	sp4	spb3	2480	2	4	80	rep2	23	15	18	12	15	10	11	18	20	87	69	62	16	25	9	0	0	0	0	0	0	0	0	0	0	0	0	0	0	0	66	34	41	21	25
HAV_6204	HAV_6204_S97_R1_001.fastq.gz	Y2019	DE2	PI 606330	nss	LN	N	sp4	spb3	2480	2	4	80	rep3	33	9	13	10	17	13	7	8	23	73	52	39	18	12	22	0	0	0	0	0	0	0	0	0	0	0	0	0	0	0	0	0	0	0	0
HAV_6205	HAV_6205_S105_R1_001.fastq.gz	Y2019	HY	Ames 26808	nss	LN	N	sp4	spb3	2482	2	4	82	rep1	87	31	57	45	58	55	43	34	81	157	113	99	41	40	63	0	0	10	18	21	17	0	0	0	15	16	0	16	6	13	62	0	0	0	0
HAV_6206	HAV_6206_S113_R1_001.fastq.gz	Y2019	HY	Ames 26808	nss	LN	N	sp4	spb3	2482	2	4	82	rep2	78	47	49	34	49	56	25	45	61	27	16	22	31	24	68	9	0	16	6	9	9	0	8	0	12	12	0	19	11	18	0	0	0	0	0
HAV_6207	HAV_6207_S121_R1_001.fastq.gz	Y2019	HY	Ames 26808	nss	LN	N	sp4	spb3	2482	2	4	82	rep3	86	38	60	43	61	74	42	48	69	117	87	91	63	47	82	14	0	21	14	16	0	10	12	0	11	22	12	17	19	17	27	17	0	0	0
HAV_6208	HAV_6208_S129_R1_001.fastq.gz	Y2019	Check_B73xMo17			LN	N	sp4	spb3	2484	2	4	84	rep1	123	74	72	53	91	93	61	74	103	27	30	26	66	67	87	18	6	11	5	14	13	0	0	0	11	15	12	14	10	16	0	0	0	0	0
HAV_6209	HAV_6209_S74_R1_001.fastq.gz	Y2019	Check_B73xMo17			LN	N	sp4	spb3	2484	2	4	84	rep2	310	184	215	166	216	211	190	189	251	42	38	24	160	185	260	14	0	29	12	14	9	0	14	0	22	21	0	18	24	32	35	0	0	0	0
HAV_6210	HAV_6210_S82_R1_001.fastq.gz	Y2019	Check_B73xMo17			LN	N	sp4	spb3	2484	2	4	84	rep3	52	29	29	22	47	37	34	39	47	213	166	138	31	30	41	0	0	0	0	0	0	0	0	0	0	0	0	0	0	0	0	0	0	0	0
HAV_6211	HAV_6211_S90_R1_001.fastq.gz	Y2019	CI64	Ames 19314	nss	LN	N	sp3	spb1	2502	2	5	02	rep1	30	14	32	14	33	32	31	17	31	42	22	17	21	28	44	33	17	41	24	32	33	15	28	14	34	38	26	25	30	36	0	0	0	0	0
HAV_6212	HAV_6212_S98_R1_001.fastq.gz	Y2019	CI64	Ames 19314	nss	LN	N	sp3	spb1	2502	2	5	02	rep2	34	28	27	26	35	27	11	20	40	30	22	16	19	23	35	23	19	19	14	26	19	0	15	0	18	21	14	18	12	24	0	0	0	0	0
HAV_6213	HAV_6213_S106_R1_001.fastq.gz	Y2019	CI64	Ames 19314	nss	LN	N	sp3	spb1	2502	2	5	02	rep3	123	52	74	46	61	65	56	55	66	19	18	16	40	47	88	16	0	11	10	18	14	0	6	0	17	18	0	16	6	12	48	0	0	0	0
HAV_6214	HAV_6214_S114_R1_001.fastq.gz	Y2019	B73HTRHM	Ames 27065	ss	LN	N	sp3	spb1	2504	2	5	04	rep1	203	98	119	105	132	120	96	110	111	15	8	11	109	118	155	0	0	0	0	0	0	0	0	0	0	0	0	0	0	0	40	18	26	0	23
HAV_6215	HAV_6215_S122_R1_001.fastq.gz	Y2019	B73HTRHM	Ames 27065	ss	LN	N	sp3	spb1	2504	2	5	04	rep2	341	188	241	172	262	249	167	189	259	131	103	123	176	191	260	14	0	15	12	4	0	6	14	0	13	15	0	24	9	13	32	0	32	0	0
HAV_6216	HAV_6216_S130_R1_001.fastq.gz	Y2019	B73HTRHM	Ames 27065	ss	LN	N	sp3	spb1	2504	2	5	04	rep3	278	141	170	128	175	202	140	150	188	45	39	40	137	139	208	0	0	0	0	0	0	0	0	0	0	0	0	0	0	0	0	0	0	0	0
HAV_6217	HAV_6217_S75_R1_001.fastq.gz	Y2019	B84	PI 608767	ss	LN	N	sp3	spb1	2505	2	5	05	rep1	83	45	65	39	53	58	47	53	67	178	137	143	38	47	48	0	0	0	0	0	0	0	0	0	0	0	0	0	0	0	0	0	0	0	0
HAV_6218	HAV_6218_S83_R1_001.fastq.gz	Y2019	B84	PI 608767	ss	LN	N	sp3	spb1	2505	2	5	05	rep2	5	7	5	4	6	10	5	11	12	116	86	73	7	7	9	0	0	0	0	0	0	0	0	0	0	0	0	0	0	0	0	64	0	0	0
HAV_6219	HAV_6219_S91_R1_001.fastq.gz	Y2019	B84	PI 608767	ss	LN	N	sp3	spb1	2505	2	5	05	rep3	275	141	187	133	170	164	142	158	190	61	50	37	127	157	210	0	0	0	0	0	0	0	0	0	0	0	0	0	0	0	53	30	40	11	31
HAV_6220	HAV_6220_S99_R1_001.fastq.gz	Y2019	B97	PI 564682	nss	LN	N	sp3	spb1	2507	2	5	07	rep1	107	68	78	39	72	80	55	51	79	380	301	286	33	43	79	0	0	0	0	0	0	0	0	0	0	0	0	0	0	0	0	0	0	0	0
HAV_6221	HAV_6221_S107_R1_001.fastq.gz	Y2019	B97	PI 564682	nss	LN	N	sp3	spb1	2507	2	5	07	rep2	135	82	87	77	105	104	95	91	98	117	102	90	63	76	126	0	0	0	0	0	0	0	0	0	0	0	0	0	0	0	0	0	0	0	0
HAV_6222	HAV_6222_S115_R1_001.fastq.gz	Y2019	B97	PI 564682	nss	LN	N	sp3	spb1	2507	2	5	07	rep3	21	10	11	8	12	8	10	6	15	140	98	78	12	11	10	0	0	0	0	0	0	0	0	0	0	0	0	0	0	0	40	0	0	0	0
HAV_6223	HAV_6223_S123_R1_001.fastq.gz	Y2019	B109	PI 597927	ss	LN	N	sp3	spb1	2509	2	5	09	rep1	43	27	30	28	21	30	23	33	30	155	120	83	22	19	36	0	0	0	0	0	0	0	0	0	13	0	0	0	0	0	109	74	86	35	52
HAV_6224	HAV_6224_S131_R1_001.fastq.gz	Y2019	B109	PI 597927	ss	LN	N	sp3	spb1	2509	2	5	09	rep2	231	115	145	90	146	139	138	139	165	17	23	14	136	108	173	0	0	0	0	10	0	0	0	0	0	0	0	0	0	0	0	0	0	0	0
HAV_6225	HAV_6225_S76_R1_001.fastq.gz	Y2019	B109	PI 597927	ss	LN	N	sp3	spb1	2509	2	5	09	rep3	132	72	100	69	106	110	61	88	100	0	0	0	67	86	141	0	0	0	0	0	0	0	0	0	0	0	0	0	0	0	35	17	27	0	0
HAV_6226	HAV_6226_S84_R1_001.fastq.gz	Y2019	A680	Ames 23503	ss	LN	N	sp3	spb1	2512	2	5	12	rep1	188	94	129	81	135	124	78	87	147	66	59	61	96	99	155	0	0	0	0	0	0	0	0	0	0	0	0	0	0	0	182	91	112	45	84
HAV_6227	HAV_6227_S92_R1_001.fastq.gz	Y2019	A680	Ames 23503	ss	LN	N	sp3	spb1	2512	2	5	12	rep2	174	109	95	75	98	91	90	102	102	60	30	48	77	83	121	0	0	0	0	9	0	0	0	0	15	14	9	0	7	10	0	0	0	0	0
HAV_6228	HAV_6228_S100_R1_001.fastq.gz	Y2019	A680	Ames 23503	ss	LN	N	sp3	spb1	2512	2	5	12	rep3	202	99	107	81	137	132	93	103	158	11	6	9	89	81	142	0	0	0	0	0	0	0	0	0	0	0	0	0	0	0	0	0	0	0	0
HAV_6229	HAV_6229_S108_R1_001.fastq.gz	Y2019	A679	PI 587142	ss	LN	N	sp3	spb1	2514	2	5	14	rep1	142	81	98	80	105	117	92	115	103	46	30	33	85	86	113	0	0	0	0	0	0	0	0	0	0	0	0	0	0	0	0	0	0	0	0
HAV_6230	HAV_6230_S116_R1_001.fastq.gz	Y2019	A679	PI 587142	ss	LN	N	sp3	spb1	2514	2	5	14	rep2	79	40	43	23	53	27	24	51	57	30	28	30	36	28	34	0	0	0	0	0	0	0	0	0	0	0	0	0	0	0	17	15	31	0	20
HAV_6231	HAV_6231_S124_R1_001.fastq.gz	Y2019	A679	PI 587142	ss	LN	N	sp3	spb1	2514	2	5	14	rep3	58	33	40	32	42	51	22	36	55	46	41	21	39	30	44	0	0	9	0	0	0	0	10	0	0	0	0	0	7	14	23	0	0	0	0
HAV_6232	HAV_6232_S132_R1_001.fastq.gz	Y2019	MO17	PI 558532	nss	LN	N	sp3	spb2	2516	2	5	16	rep1	41	27	28	13	22	30	19	29	37	7	11	9	15	21	29	0	0	0	0	0	0	0	0	0	0	0	0	0	0	0	48	0	0	0	0
HAV_6233	HAV_6233_S1_R1_001.fastq.gz	Y2019	MO17	PI 558532	nss	LN	N	sp3	spb2	2516	2	5	16	rep2	37	21	26	20	35	31	29	21	30	43	26	18	27	16	23	0	0	0	0	0	0	0	0	0	0	0	0	0	0	0	0	0	0	0	0
HAV_6234	HAV_6234_S10_R1_001.fastq.gz	Y2019	MO17	PI 558532	nss	LN	N	sp3	spb2	2516	2	5	16	rep3	27	13	15	14	19	24	8	9	13	27	22	17	9	16	23	0	0	0	0	0	0	0	0	0	0	0	0	0	0	0	28	0	0	0	0
HAV_6235	HAV_6235_S19_R1_001.fastq.gz	Y2019	NC306	Ames 27149	ss	LN	N	sp3	spb2	2518	2	5	18	rep1	20	17	15	13	13	15	16	19	21	65	46	33	9	15	19	0	0	0	0	0	0	0	0	0	0	0	0	0	0	0	70	24	67	0	34
HAV_6236	HAV_6236_S28_R1_001.fastq.gz	Y2019	NC306	Ames 27149	ss	LN	N	sp3	spb2	2518	2	5	18	rep2	34	16	29	22	31	29	30	32	41	84	70	49	25	31	36	0	0	0	0	0	0	0	0	0	0	0	0	0	0	0	59	22	36	11	27
HAV_6237	HAV_6237_S37_R1_001.fastq.gz	Y2019	NC306	Ames 27149	ss	LN	N	sp3	spb2	2518	2	5	18	rep3	11	0	16	17	14	19	3	7	11	11	5	10	8	5	10	0	0	0	0	0	0	0	0	0	0	0	0	0	0	0	206	124	181	64	88
HAV_6238	HAV_6238_S45_R1_001.fastq.gz	Y2019	NC368	Ames 27180	ss	LN	N	sp3	spb2	2520	2	5	20	rep1	20	11	5	12	13	10	17	11	11	93	49	81	10	14	16	0	0	0	0	0	0	0	0	0	0	0	0	0	0	0	0	0	0	0	0
HAV_6239	HAV_6239_S53_R1_001.fastq.gz	Y2019	NC368	Ames 27180	ss	LN	N	sp3	spb2	2520	2	5	20	rep2	49	17	24	14	27	18	18	18	31	32	24	18	26	22	21	0	0	0	0	0	0	0	0	0	0	0	0	0	0	0	0	0	0	0	0
HAV_6240	HAV_6240_S61_R1_001.fastq.gz	Y2019	NC368	Ames 27180	ss	LN	N	sp3	spb2	2520	2	5	20	rep3	65	36	36	23	62	45	38	41	69	177	128	112	35	39	56	0	0	0	0	0	0	0	0	0	0	0	0	0	0	0	0	0	0	0	0
HAV_6241	HAV_6241_S2_R1_001.fastq.gz	Y2019	Check_B73xMo17			LN	N	sp3	spb2	2521	2	5	21	rep1	46	14	32	20	30	21	18	17	22	64	45	40	24	24	27	19	0	19	8	19	13	0	9	0	13	23	11	27	13	19	0	0	0	0	0
HAV_6242	HAV_6242_S11_R1_001.fastq.gz	Y2019	Check_B73xMo17			LN	N	sp3	spb2	2521	2	5	21	rep2	95	60	62	51	76	65	53	70	67	42	17	25	52	66	81	10	0	14	12	10	0	0	11	0	14	14	0	8	13	12	0	0	0	0	0
HAV_6243	HAV_6243_S20_R1_001.fastq.gz	Y2019	Check_B73xMo17			LN	N	sp3	spb2	2521	2	5	21	rep3	123	82	96	70	97	79	69	62	92	30	16	19	93	48	98	17	10	23	9	22	13	17	22	0	22	25	15	21	26	20	0	0	0	0	0
HAV_6244	HAV_6244_S29_R1_001.fastq.gz	Y2019	NC342	Ames 27167	nss	LN	N	sp3	spb2	2524	2	5	24	rep1	16	16	9	7	13	13	13	10	18	9	9	5	11	12	9	0	0	0	0	0	0	0	0	0	0	0	0	0	0	0	0	0	0	0	0
HAV_6245	HAV_6245_S38_R1_001.fastq.gz	Y2019	NC342	Ames 27167	nss	LN	N	sp3	spb2	2524	2	5	24	rep2	46	29	41	31	34	34	38	33	33	198	125	134	29	20	43	0	0	0	0	0	0	0	0	0	0	0	0	0	0	0	0	0	0	0	0
HAV_6246	HAV_6246_S78_R1_001.fastq.gz	Y2019	NC342	Ames 27167	nss	LN	N	sp3	spb2	2524	2	5	24	rep3	92	53	65	36	54	46	33	52	71	106	87	85	41	45	71	15	11	22	15	24	13	0	20	6	20	19	16	27	22	20	73	0	0	0	0
HAV_6247	HAV_6247_S54_R1_001.fastq.gz	Y2019	MO45	PI 583350	mixed	LN	N	sp3	spb2	2525	2	5	25	rep1	89	57	68	48	56	75	47	58	93	32	35	29	44	50	88	0	0	9	12	0	0	0	13	0	12	11	0	25	7	0	0	23	0	0	0
HAV_6248	HAV_6248_S62_R1_001.fastq.gz	Y2019	MO45	PI 583350	mixed	LN	N	sp3	spb2	2525	2	5	25	rep2	133	53	65	61	87	78	56	54	97	28	33	26	56	69	105	0	0	17	0	15	0	0	13	0	9	15	0	0	0	12	0	0	0	0	0
HAV_6249	HAV_6249_S3_R1_001.fastq.gz	Y2019	MO45	PI 583350	mixed	LN	N	sp3	spb2	2525	2	5	25	rep3	188	86	105	79	99	107	93	89	105	177	134	126	98	93	138	0	0	0	0	0	0	0	0	0	0	0	0	0	0	11	0	0	0	0	0
HAV_6250	HAV_6250_S12_R1_001.fastq.gz	Y2019	NC362	Ames 27177	mixed	LN	N	sp3	spb2	2527	2	5	27	rep1	228	101	125	114	151	123	120	147	149	25	30	13	118	107	174	7	0	12	0	14	0	0	14	0	16	13	0	12	17	13	0	0	0	0	0
HAV_6251	HAV_6251_S21_R1_001.fastq.gz	Y2019	NC362	Ames 27177	mixed	LN	N	sp3	spb2	2527	2	5	27	rep2	187	106	125	90	134	99	77	101	132	44	50	36	79	94	101	0	0	0	0	0	0	0	9	0	0	0	0	0	0	0	31	0	19	0	0
HAV_6252	HAV_6252_S30_R1_001.fastq.gz	Y2019	NC362	Ames 27177	mixed	LN	N	sp3	spb2	2527	2	5	27	rep3	193	115	117	93	114	143	97	125	150	45	35	32	96	95	133	0	0	14	0	12	0	0	12	0	12	17	12	0	9	17	0	0	0	0	0
HAV_6253	HAV_6253_S39_R1_001.fastq.gz	Y2019	CI90C	Ames 31534	mixed	LN	N	sp3	spb3	2530	2	5	30	rep1	132	43	68	46	70	60	58	54	73	62	48	30	53	59	51	13	0	13	0	14	8	0	14	0	12	23	10	10	0	13	37	0	22	0	0
HAV_6254	HAV_6254_S47_R1_001.fastq.gz	Y2019	CI90C	Ames 31534	mixed	LN	N	sp3	spb3	2530	2	5	30	rep2	31	9	21	12	25	21	19	15	27	33	47	39	15	7	23	0	0	0	0	0	0	0	0	0	0	0	0	0	0	0	0	0	0	0	0
HAV_6255	HAV_6255_S55_R1_001.fastq.gz	Y2019	CI90C	Ames 31534	mixed	LN	N	sp3	spb3	2530	2	5	30	rep3	116	68	78	61	67	71	55	49	114	35	30	37	66	61	88	12	7	21	21	24	13	0	16	0	20	21	11	21	15	20	0	0	0	0	0
HAV_6256	HAV_6256_S63_R1_001.fastq.gz	Y2019	Check_B73xMo17			LN	N	sp3	spb3	2531	2	5	31	rep1	21	0	14	9	5	15	20	16	6	5	10	5	17	10	13	0	0	0	0	0	0	0	0	0	0	0	0	0	0	0	0	0	0	0	0
HAV_6257	HAV_6257_S4_R1_001.fastq.gz	Y2019	Check_B73xMo17			LN	N	sp3	spb3	2531	2	5	31	rep2	33	0	17	17	27	23	21	19	23	7	7	2	15	14	22	0	0	0	0	0	0	0	0	0	0	0	0	0	0	0	0	0	0	0	0
HAV_6258	HAV_6258_S13_R1_001.fastq.gz	Y2019	Check_B73xMo17			LN	N	sp3	spb3	2531	2	5	31	rep3	118	59	75	58	73	68	46	49	71	57	43	39	50	63	74	17	13	22	18	19	16	11	23	0	32	36	17	22	17	32	0	0	0	0	0
HAV_6259	HAV_6259_S22_R1_001.fastq.gz	Y2019	R229	PI 592734	ss	LN	N	sp3	spb3	2534	2	5	34	rep1	42	17	36	21	40	34	21	22	35	3	8	2	29	22	35	0	0	17	0	24	0	0	0	0	14	14	0	4	10	17	58	0	0	0	0
HAV_6260	HAV_6260_S31_R1_001.fastq.gz	Y2019	R229	PI 592734	ss	LN	N	sp3	spb3	2534	2	5	34	rep2	57	26	51	22	38	37	27	24	47	11	5	6	27	26	31	0	0	0	0	0	0	0	0	0	0	0	0	0	0	0	52	0	20	12	14
HAV_6261	HAV_6261_S40_R1_001.fastq.gz	Y2019	R229	PI 592734	ss	LN	N	sp3	spb3	2534	2	5	34	rep3	143	73	84	72	98	91	63	78	93	58	41	31	80	89	116	0	0	0	0	0	7	0	0	0	0	0	0	0	0	0	0	0	22	0	0
HAV_6262	HAV_6262_S48_R1_001.fastq.gz	Y2019	SG1533	PI 587132	popcorn	LN	N	sp3	spb3	2535	2	5	35	rep1	91	53	47	53	77	80	47	46	55	30	16	14	57	63	79	0	0	0	0	0	0	0	0	0	0	0	0	0	0	0	0	0	0	0	0
HAV_6263	HAV_6263_S56_R1_001.fastq.gz	Y2019	SG1533	PI 587132	popcorn	LN	N	sp3	spb3	2535	2	5	35	rep2	178	96	104	60	116	107	100	91	128	96	73	82	67	89	128	0	0	0	0	0	0	0	0	0	0	0	0	0	0	0	0	9	0	0	0
HAV_6264	HAV_6264_S64_R1_001.fastq.gz	Y2019	SG1533	PI 587132	popcorn	LN	N	sp3	spb3	2535	2	5	35	rep3	33	24	30	19	26	23	21	23	37	101	82	48	30	23	48	0	0	0	0	0	0	0	0	0	0	0	0	0	0	0	0	0	0	0	0
HAV_6265	HAV_6265_S5_R1_001.fastq.gz	Y2019	Check_B73xMo17			LN	N	sp3	spb3	2538	2	5	38	rep1	29	0	21	11	17	11	13	16	30	12	17	7	15	10	13	0	0	0	0	0	0	0	0	0	0	0	0	0	0	0	0	0	0	0	0
HAV_6266	HAV_6266_S14_R1_001.fastq.gz	Y2019	Check_B73xMo17			LN	N	sp3	spb3	2538	2	5	38	rep2	0	0	0	0	0	0	0	0	0	0	0	0	0	0	0	0	0	42	0	0	0	0	36	0	57	17	0	10	18	0	0	0	0	0	0
HAV_6267	HAV_6267_S23_R1_001.fastq.gz	Y2019	Check_B73xMo17			LN	N	sp3	spb3	2538	2	5	38	rep3	7	2	2	8	2	8	7	3	15	11	17	8	5	10	5	0	0	0	0	0	0	0	0	0	0	0	0	0	0	0	0	0	0	0	0
HAV_6268	HAV_6268_S32_R1_001.fastq.gz	Y2019	CO109	PI 587125	nss	LN	N	sp3	spb3	2540	2	5	40	rep1	36	14	26	21	16	21	20	22	24	24	15	13	20	32	24	0	0	0	0	0	0	0	0	0	0	8	0	0	0	0	50	27	31	14	24
HAV_6269	HAV_6269_S41_R1_001.fastq.gz	Y2019	CO109	PI 587125	nss	LN	N	sp3	spb3	2540	2	5	40	rep2	56	14	32	37	47	42	29	43	34	8	9	8	32	45	33	0	0	0	0	0	0	0	0	0	0	0	0	0	0	0	34	22	26	0	12
HAV_6270	HAV_6270_S49_R1_001.fastq.gz	Y2019	CO109	PI 587125	nss	LN	N	sp3	spb3	2540	2	5	40	rep3	0	0	0	0	0	0	0	0	0	0	0	0	0	0	0	0	0	0	0	0	0	0	0	0	0	0	0	0	0	0	0	0	18	0	0
HAV_6271	HAV_6271_S57_R1_001.fastq.gz	Y2019	R4	Ames 27187	nss	LN	N	sp3	spb3	2541	2	5	41	rep1	50	35	33	39	49	45	32	30	45	6	3	3	36	37	51	0	0	0	0	0	0	0	0	0	0	0	0	0	0	0	0	0	0	0	0
HAV_6272	HAV_6272_S65_R1_001.fastq.gz	Y2019	R4	Ames 27187	nss	LN	N	sp3	spb3	2541	2	5	41	rep2	18	16	20	11	18	13	8	8	20	15	8	7	17	18	22	0	0	0	0	0	0	0	0	0	0	0	0	0	0	0	0	0	23	0	0
HAV_6273	HAV_6273_S6_R1_001.fastq.gz	Y2019	R4	Ames 27187	nss	LN	N	sp3	spb3	2541	2	5	41	rep3	70	35	32	28	39	28	42	31	37	32	17	17	26	38	50	0	0	0	0	0	0	0	0	0	0	0	0	0	0	0	0	0	0	0	0
HAV_6274	HAV_6274_S15_R1_001.fastq.gz	Y2019	Check_B73xMo17			LN	N	sp4	spb1	2544	2	5	44	rep1	28	14	8	15	14	17	12	6	18	13	7	11	8	6	21	0	0	0	0	0	0	0	0	0	0	0	0	0	0	0	0	0	0	0	0
HAV_6275	HAV_6275_S24_R1_001.fastq.gz	Y2019	Check_B73xMo17			LN	N	sp4	spb1	2544	2	5	44	rep2	73	20	42	26	41	51	30	35	44	6	3	3	35	35	35	0	0	0	0	0	0	0	0	0	0	0	0	0	0	0	0	0	0	0	0
HAV_6276	HAV_6276_S33_R1_001.fastq.gz	Y2019	Check_B73xMo17			LN	N	sp4	spb1	2544	2	5	44	rep3	31	21	22	12	23	18	8	19	21	113	102	82	13	9	38	19	4	23	16	9	21	10	17	0	18	24	8	26	21	21	62	0	0	0	0
HAV_6277	HAV_6277_S42_R1_001.fastq.gz	Y2019	CML322	Ames 27096	ts	LN	N	sp4	spb1	2546	2	5	46	rep1	137	74	121	69	111	90	73	100	113	9	8	7	67	73	109	22	14	35	19	34	30	15	32	8	34	35	21	34	27	42	0	0	0	0	0
HAV_6278	HAV_6278_S79_R1_001.fastq.gz	Y2019	CML322	Ames 27096	ts	LN	N	sp4	spb1	2546	2	5	46	rep2	88	40	65	47	72	59	45	48	55	143	105	77	33	53	83	0	0	0	0	0	0	0	0	0	0	0	0	0	0	0	0	0	0	0	0
HAV_6279	HAV_6279_S58_R1_001.fastq.gz	Y2019	CML322	Ames 27096	ts	LN	N	sp4	spb1	2546	2	5	46	rep3	79	46	59	41	60	63	47	50	72	41	26	23	49	42	62	0	0	0	0	0	0	0	0	0	0	0	0	0	0	0	0	0	0	0	0
HAV_6280	HAV_6280_S66_R1_001.fastq.gz	Y2019	B68	PI 550465	ss	LN	N	sp4	spb1	2548	2	5	48	rep1	32	21	22	18	31	18	22	13	14	5	1	8	18	29	31	0	0	0	0	0	0	0	0	0	0	0	0	0	0	0	0	0	0	0	0
HAV_6281	HAV_6281_S7_R1_001.fastq.gz	Y2019	B68	PI 550465	ss	LN	N	sp4	spb1	2548	2	5	48	rep2	20	0	8	0	0	42	0	0	36	0	0	0	0	0	0	0	0	0	0	0	0	0	0	0	0	0	0	0	0	0	0	0	0	0	0
HAV_6282	HAV_6282_S16_R1_001.fastq.gz	Y2019	B68	PI 550465	ss	LN	N	sp4	spb1	2548	2	5	48	rep3	74	44	40	43	53	40	42	44	60	10	12	1	31	40	61	0	0	0	0	0	0	0	0	0	0	0	0	0	0	0	0	0	0	0	0
HAV_6283	HAV_6283_S25_R1_001.fastq.gz	Y2019	A214N	PI 406112	mixed	LN	N	sp4	spb1	2549	2	5	49	rep1	63	28	42	34	51	52	31	29	59	0	0	0	36	38	57	0	0	0	0	0	0	0	0	0	0	0	0	0	0	0	0	0	0	0	0
HAV_6284	HAV_6284_S34_R1_001.fastq.gz	Y2019	A214N	PI 406112	mixed	LN	N	sp4	spb1	2549	2	5	49	rep2	169	80	101	82	87	113	81	83	120	15	8	2	90	83	134	0	0	0	0	0	0	0	0	0	0	0	0	0	0	0	0	0	0	0	0
HAV_6285	HAV_6285_S43_R1_001.fastq.gz	Y2019	A214N	PI 406112	mixed	LN	N	sp4	spb1	2549	2	5	49	rep3	33	17	32	6	23	24	15	23	25	0	0	0	23	14	17	0	0	0	0	0	0	0	0	0	0	0	0	0	0	0	0	0	0	0	0
HAV_6286	HAV_6286_S51_R1_001.fastq.gz	Y2019	4722	PI 587130	popcorn	LN	N	sp4	spb1	2551	2	5	51	rep1	44	7	33	20	22	30	26	34	35	22	19	14	21	21	44	0	0	0	0	0	0	0	0	0	0	0	0	0	0	0	0	0	0	0	0
HAV_6287	HAV_6287_S59_R1_001.fastq.gz	Y2019	4722	PI 587130	popcorn	LN	N	sp4	spb1	2551	2	5	51	rep2	61	37	54	31	39	47	42	40	51	0	0	0	37	26	51	0	0	0	0	0	0	0	0	0	0	0	0	0	0	0	0	0	0	0	0
HAV_6288	HAV_6288_S67_R1_001.fastq.gz	Y2019	4722	PI 587130	popcorn	LN	N	sp4	spb1	2551	2	5	51	rep3	14	10	10	10	11	16	7	11	12	35	31	27	7	5	12	0	10	6	0	0	0	0	0	0	10	16	0	0	0	13	0	0	0	0	0
HAV_6289	HAV_6289_S8_R1_001.fastq.gz	Y2019	CML321	Ames 27095	ts	LN	N	sp4	spb1	2553	2	5	53	rep1	26	11	11	8	13	5	5	10	11	11	9	7	7	10	9	0	0	0	0	0	0	0	0	0	0	0	0	0	0	0	0	0	0	0	0
HAV_6290	HAV_6290_S17_R1_001.fastq.gz	Y2019	CML321	Ames 27095	ts	LN	N	sp4	spb1	2553	2	5	53	rep2	30	17	16	19	19	20	20	18	17	36	26	15	15	15	23	0	0	0	0	0	0	0	0	0	0	0	0	0	0	0	0	0	0	0	0
HAV_6291	HAV_6291_S26_R1_001.fastq.gz	Y2019	CML321	Ames 27095	ts	LN	N	sp4	spb1	2553	2	5	53	rep3	106	63	98	48	72	69	61	69	75	11	7	3	60	62	80	0	0	0	0	0	0	0	0	0	0	0	0	0	0	0	0	0	0	0	0
HAV_6292	HAV_6292_S35_R1_001.fastq.gz	Y2019	Check_B73xMo17			LN	N	sp4	spb1	2555	2	5	55	rep1	38	30	24	25	34	26	20	17	24	0	0	0	14	17	22	0	0	0	0	0	0	0	0	0	0	0	0	0	0	0	0	0	0	0	0
HAV_6293	HAV_6293_S44_R1_001.fastq.gz	Y2019	Check_B73xMo17			LN	N	sp4	spb1	2555	2	5	55	rep2	83	40	46	19	41	41	35	42	62	16	7	6	37	28	46	0	0	0	0	0	0	0	0	0	0	0	0	0	0	0	0	0	0	0	0
HAV_6294	HAV_6294_S52_R1_001.fastq.gz	Y2019	Check_B73xMo17			LN	N	sp4	spb1	2555	2	5	55	rep3	8	6	7	0	7	6	6	7	10	15	20	13	9	5	7	0	0	0	32	17	13	0	5	0	11	7	0	18	11	21	0	0	0	0	0
HAV_6295	HAV_6295_S60_R1_001.fastq.gz	Y2019	NC258	PI 531084	nss	LN	N	sp4	spb2	2557	2	5	57	rep1	29	17	21	7	34	15	15	13	19	27	12	14	19	15	21	0	0	0	0	0	0	0	0	0	0	0	0	0	0	0	0	0	0	0	0
HAV_6296	HAV_6296_S68_R1_001.fastq.gz	Y2019	NC258	PI 531084	nss	LN	N	sp4	spb2	2557	2	5	57	rep2	34	28	22	31	31	26	26	20	21	80	67	43	14	15	46	0	0	0	0	0	0	0	0	0	0	0	0	0	0	0	0	0	0	0	0
HAV_6297	HAV_6297_S69_R1_001.fastq.gz	Y2019	NC258	PI 531084	nss	LN	N	sp4	spb2	2557	2	5	57	rep3	73	31	42	37	61	55	25	50	32	17	31	14	49	38	60	0	0	0	0	0	0	0	0	0	0	0	0	0	0	0	0	0	0	0	0
HAV_6298	HAV_6298_S77_R1_001.fastq.gz	Y2019	F44	NSL 22893	mixed	LN	N	sp4	spb2	2560	2	5	60	rep1	33	18	26	19	30	22	15	23	23	12	9	6	24	23	20	0	0	0	0	0	0	0	0	0	0	0	0	0	0	0	37	21	37	0	24
HAV_6299	HAV_6299_S85_R1_001.fastq.gz	Y2019	F44	NSL 22893	mixed	LN	N	sp4	spb2	2560	2	5	60	rep2	95	41	59	39	87	54	49	53	74	15	9	14	49	54	77	0	0	0	0	0	0	0	0	0	0	0	0	0	0	0	0	0	0	0	0
HAV_6300	HAV_6300_S93_R1_001.fastq.gz	Y2019	F44	NSL 22893	mixed	LN	N	sp4	spb2	2560	2	5	60	rep3	26	15	19	9	18	16	14	15	25	22	17	10	17	12	12	0	0	0	0	0	0	0	0	0	0	0	0	0	0	0	22	0	0	0	0
HAV_6301	HAV_6301_S101_R1_001.fastq.gz	Y2019	NC222	Ames 12729	nss	LN	N	sp4	spb2	2562	2	5	62	rep1	13	14	11	13	10	15	8	19	10	9	11	5	5	12	16	0	0	0	0	0	0	0	0	0	0	0	0	0	0	0	0	0	41	0	0
HAV_6302	HAV_6302_S109_R1_001.fastq.gz	Y2019	NC222	Ames 12729	nss	LN	N	sp4	spb2	2562	2	5	62	rep2	42	15	44	23	21	25	26	32	26	4	4	4	20	16	25	0	0	0	0	0	0	0	0	0	0	0	0	0	0	0	29	0	20	0	17
HAV_6303	HAV_6303_S117_R1_001.fastq.gz	Y2019	NC222	Ames 12729	nss	LN	N	sp4	spb2	2562	2	5	62	rep3	212	86	129	104	136	129	96	95	148	0	0	0	92	78	143	0	0	0	0	0	0	0	0	0	0	0	0	0	0	0	49	28	22	13	22
HAV_6304	HAV_6304_S125_R1_001.fastq.gz	Y2019	M37W	Ames 27133	mixed	LN	N	sp4	spb2	2564	2	5	64	rep1	53	22	23	18	22	26	16	22	40	103	72	62	26	24	31	24	0	10	17	0	10	0	12	0	14	16	8	24	9	15	0	0	0	0	0
HAV_6305	HAV_6305_S70_R1_001.fastq.gz	Y2019	M37W	Ames 27133	mixed	LN	N	sp4	spb2	2564	2	5	64	rep2	47	14	17	21	29	30	16	15	32	24	20	23	15	24	23	0	0	0	0	0	0	0	0	0	0	0	0	0	0	0	0	0	0	0	0
HAV_6306	HAV_6306_S78_R1_001.fastq.gz	Y2019	M37W	Ames 27133	mixed	LN	N	sp4	spb2	2564	2	5	64	rep3	43	16	32	21	28	25	28	31	16	125	97	93	14	28	34	0	0	0	0	0	0	0	0	0	0	0	0	0	0	0	0	0	0	0	0
HAV_6307	HAV_6307_S86_R1_001.fastq.gz	Y2019	Check_B73xMo17			LN	N	sp4	spb2	2566	2	5	66	rep1	115	43	75	54	76	60	55	58	77	27	20	26	58	55	100	12	12	19	10	13	13	0	15	0	10	24	0	19	15	16	0	0	0	0	0
HAV_6308	HAV_6308_S94_R1_001.fastq.gz	Y2019	Check_B73xMo17			LN	N	sp4	spb2	2566	2	5	66	rep2	21	11	14	5	13	14	15	8	19	82	66	58	16	10	16	0	0	0	0	0	0	0	0	0	0	10	0	13	11	0	60	0	0	0	0
HAV_6309	HAV_6309_S102_R1_001.fastq.gz	Y2019	Check_B73xMo17			LN	N	sp4	spb2	2566	2	5	66	rep3	21	13	13	5	13	11	11	6	9	29	25	19	9	9	9	0	0	0	0	0	0	0	0	0	0	6	0	0	0	0	0	0	0	0	0
HAV_6310	HAV_6310_S110_R1_001.fastq.gz	Y2019	NC348	Ames 27170	ts	LN	N	sp4	spb2	2567	2	5	67	rep1	14	13	14	11	20	21	9	17	18	9	5	12	14	24	20	27	0	13	0	0	0	0	0	0	10	7	0	12	0	0	0	0	0	0	0
HAV_6311	HAV_6311_S118_R1_001.fastq.gz	Y2019	NC348	Ames 27170	ts	LN	N	sp4	spb2	2567	2	5	67	rep2	79	45	51	36	71	59	40	37	57	0	0	0	36	36	60	0	0	0	0	0	0	0	0	0	0	0	0	0	0	0	0	0	0	0	0
HAV_6312	HAV_6312_S126_R1_001.fastq.gz	Y2019	NC348	Ames 27170	ts	LN	N	sp4	spb2	2567	2	5	67	rep3	51	34	40	30	40	35	25	42	42	0	0	0	37	34	36	0	0	0	0	0	0	0	0	0	0	0	0	0	0	0	0	0	0	0	0
HAV_6313	HAV_6313_S71_R1_001.fastq.gz	Y2019	NC346	Ames 27169	ts	LN	N	sp4	spb2	2570	2	5	70	rep1	34	18	22	14	19	19	19	22	22	7	5	7	16	12	32	0	0	0	0	0	0	0	0	0	0	0	0	0	0	0	0	0	0	0	0
HAV_6314	HAV_6314_S79_R1_001.fastq.gz	Y2019	NC346	Ames 27169	ts	LN	N	sp4	spb2	2570	2	5	70	rep2	89	38	41	35	47	44	39	49	60	0	0	0	46	35	67	0	0	0	0	0	0	0	0	0	0	0	0	0	0	0	0	0	0	0	0
HAV_6315	HAV_6315_S87_R1_001.fastq.gz	Y2019	NC346	Ames 27169	ts	LN	N	sp4	spb2	2570	2	5	70	rep3	209	98	118	78	130	121	111	110	122	50	49	51	90	102	163	0	0	0	0	14	0	0	0	0	9	0	0	0	0	0	21	17	17	0	0
HAV_6316	HAV_6316_S95_R1_001.fastq.gz	Y2019	Check_B73xMo17			LN	N	sp4	spb3	2571	2	5	71	rep1	125	78	80	51	71	89	59	69	90	4	6	8	53	56	101	15	0	18	10	7	12	0	10	0	22	17	0	10	0	15	0	0	0	0	0
HAV_6317	HAV_6317_S103_R1_001.fastq.gz	Y2019	Check_B73xMo17			LN	N	sp4	spb3	2571	2	5	71	rep2	63	30	43	27	37	44	27	29	56	0	0	0	29	43	54	0	0	0	0	0	0	0	0	0	0	0	0	0	0	0	0	0	0	0	0
HAV_6318	HAV_6318_S80_R1_001.fastq.gz	Y2019	Check_B73xMo17			LN	N	sp4	spb3	2571	2	5	71	rep3	54	25	34	20	43	29	20	27	42	5	3	3	27	27	36	0	0	0	0	0	0	0	0	0	0	0	0	0	0	0	0	0	0	0	0
HAV_6319	HAV_6319_S119_R1_001.fastq.gz	Y2019	Check_B73xMo17			LN	N	sp4	spb3	2574	2	5	74	rep1	22	12	32	19	24	19	24	23	24	9	16	10	19	17	30	0	0	0	0	0	0	0	0	0	0	13	0	0	0	0	0	0	0	0	0
HAV_6320	HAV_6320_S127_R1_001.fastq.gz	Y2019	Check_B73xMo17			LN	N	sp4	spb3	2574	2	5	74	rep2	34	13	21	10	20	8	16	16	27	17	21	8	23	13	22	0	0	0	0	0	0	0	0	0	0	0	0	0	0	0	0	0	0	0	0
HAV_6321	HAV_6321_S72_R1_001.fastq.gz	Y2019	Check_B73xMo17			LN	N	sp4	spb3	2574	2	5	74	rep3	51	25	39	29	34	31	20	37	37	16	9	8	28	22	30	9	0	11	5	16	7	0	6	0	19	12	6	11	5	14	0	0	0	0	0
HAV_6322	HAV_6322_S80_R1_001.fastq.gz	Y2019	MO1W	PI 558520	nss	LN	N	sp4	spb3	2575	2	5	75	rep1	29	18	18	7	16	20	13	24	22	4	3	5	14	13	21	0	0	0	0	0	0	0	0	0	0	0	0	0	0	0	0	0	0	0	0
HAV_6323	HAV_6323_S88_R1_001.fastq.gz	Y2019	MO1W	PI 558520	nss	LN	N	sp4	spb3	2575	2	5	75	rep2	66	33	33	33	46	38	34	32	44	8	7	7	31	45	40	0	0	10	9	0	0	0	0	0	0	9	9	10	11	13	0	0	0	0	0
HAV_6324	HAV_6324_S96_R1_001.fastq.gz	Y2019	MO1W	PI 558520	nss	LN	N	sp4	spb3	2575	2	5	75	rep3	154	71	92	85	107	91	81	92	93	56	42	34	63	55	113	0	0	6	0	9	13	0	0	0	14	9	0	0	0	11	0	0	0	0	0
HAV_6325	HAV_6325_S104_R1_001.fastq.gz	Y2019	Check_B73xMo17			LN	N	sp4	spb3	2577	2	5	77	rep1	11	8	14	9	9	10	6	7	17	28	14	15	11	11	13	0	0	0	0	0	0	0	0	0	0	0	0	0	0	0	0	0	0	0	0
HAV_6326	HAV_6326_S81_R1_001.fastq.gz	Y2019	Check_B73xMo17			LN	N	sp4	spb3	2577	2	5	77	rep2	32	16	17	23	20	19	21	25	24	31	29	26	10	17	21	0	0	0	0	0	0	0	0	0	9	9	0	15	11	0	39	0	0	0	0
HAV_6327	HAV_6327_S120_R1_001.fastq.gz	Y2019	Check_B73xMo17			LN	N	sp4	spb3	2577	2	5	77	rep3	21	12	13	11	19	11	7	11	22	37	26	30	13	6	9	0	0	14	0	0	0	0	5	0	0	0	0	16	0	20	58	0	0	0	0
HAV_6328	HAV_6328_S128_R1_001.fastq.gz	Y2019	KI2021	Ames 27129	ts	LN	N	sp4	spb3	2579	2	5	79	rep1	37	20	29	22	24	25	28	25	29	70	51	49	14	18	25	0	0	0	0	0	0	0	0	0	0	0	0	0	0	0	0	0	0	0	0
HAV_6329	HAV_6329_S73_R1_001.fastq.gz	Y2019	KI2021	Ames 27129	ts	LN	N	sp4	spb3	2579	2	5	79	rep2	28	13	13	5	17	9	13	18	16	13	6	4	6	16	16	0	0	0	0	0	0	0	0	0	0	0	0	0	0	0	0	0	0	0	0
HAV_6330	HAV_6330_S81_R1_001.fastq.gz	Y2019	KI2021	Ames 27129	ts	LN	N	sp4	spb3	2579	2	5	79	rep3	17	10	13	8	13	15	7	7	10	40	39	40	12	11	15	0	0	0	0	0	0	0	0	0	0	0	0	0	0	0	53	0	0	0	0
HAV_6331	HAV_6331_S89_R1_001.fastq.gz	Y2019	IL101	Ames 27119	sweet	LN	N	sp4	spb3	2582	2	5	82	rep1	41	23	31	16	21	21	16	30	34	106	83	79	19	23	32	0	0	0	0	0	0	0	0	0	0	0	0	0	0	0	49	0	0	0	0
HAV_6332	HAV_6332_S97_R1_001.fastq.gz	Y2019	IL101	Ames 27119	sweet	LN	N	sp4	spb3	2582	2	5	82	rep2	33	23	20	11	18	31	20	19	30	166	113	99	11	14	26	0	0	0	0	0	0	0	0	0	0	0	0	0	0	0	39	30	23	0	18
HAV_6333	HAV_6333_S105_R1_001.fastq.gz	Y2019	IL101	Ames 27119	sweet	LN	N	sp4	spb3	2582	2	5	82	rep3	4	3	0	0	0	0	0	0	0	30	31	21	0	0	0	0	0	0	0	0	0	0	0	0	0	0	0	0	0	0	69	47	62	25	37
HAV_6334	HAV_6334_S82_R1_001.fastq.gz	Y2019	PA91	PI 587147	nss	LN	N	sp4	spb3	2583	2	5	83	rep1	79	29	41	42	47	48	36	43	63	45	30	24	44	36	57	0	0	0	0	0	0	0	0	0	0	0	0	0	0	0	0	0	0	0	0
HAV_6335	HAV_6335_S121_R1_001.fastq.gz	Y2019	PA91	PI 587147	nss	LN	N	sp4	spb3	2583	2	5	83	rep2	144	67	101	50	85	89	62	87	98	41	31	28	81	96	121	0	0	0	0	0	0	0	0	0	0	0	0	0	0	0	0	0	0	0	0
HAV_6336	HAV_6336_S129_R1_001.fastq.gz	Y2019	PA91	PI 587147	nss	LN	N	sp4	spb3	2583	2	5	83	rep3	184	85	122	82	135	124	87	120	133	15	19	11	76	89	136	10	6	16	18	13	15	9	9	0	18	24	0	11	8	25	0	0	0	0	0
HAV_6337	HAV_6337_S74_R1_001.fastq.gz	Y2019	A214N	PI 406112	mixed	LN	S	sp1	spb1	3002	3	0	02	rep1	15	16	20	3	12	9	9	15	17	9	16	15	20	9	14	0	0	0	0	0	0	0	0	0	0	0	0	0	0	0	0	0	0	0	0
HAV_6338	HAV_6338_S82_R1_001.fastq.gz	Y2019	A214N	PI 406112	mixed	LN	S	sp1	spb1	3002	3	0	02	rep2	39	0	23	0	6	9	0	0	0	0	0	19	13	0	4	0	0	0	0	0	0	0	0	0	0	0	0	0	0	0	0	0	0	0	0
HAV_6339	HAV_6339_S90_R1_001.fastq.gz	Y2019	A214N	PI 406112	mixed	LN	S	sp1	spb1	3002	3	0	02	rep3	36	10	28	23	27	29	20	29	41	60	44	33	24	31	50	0	0	0	0	0	0	0	0	0	0	0	0	0	0	0	0	0	0	0	0
HAV_6340	HAV_6340_S98_R1_001.fastq.gz	Y2019	B10	NSL 65865	mixed	LN	S	sp1	spb1	3004	3	0	04	rep1	66	31	36	30	41	44	33	49	40	80	65	49	35	30	51	0	0	0	0	0	0	0	0	0	0	0	0	0	0	0	0	0	0	0	0
HAV_6341	HAV_6341_S106_R1_001.fastq.gz	Y2019	B10	NSL 65865	mixed	LN	S	sp1	spb1	3004	3	0	04	rep2	38	16	28	14	21	21	14	27	21	2	10	12	18	19	22	0	0	0	0	0	0	0	0	0	0	0	0	0	0	0	0	0	0	0	0
HAV_6342	HAV_6342_S83_R1_001.fastq.gz	Y2019	B10	NSL 65865	mixed	LN	S	sp1	spb1	3004	3	0	04	rep3	119	51	72	50	80	64	58	66	104	136	109	94	68	47	97	0	0	0	0	0	0	0	0	0	11	0	0	0	0	0	38	33	34	0	21
HAV_6343	HAV_6343_S122_R1_001.fastq.gz	Y2019	CML103	Ames 27081	ts	LN	S	sp1	spb1	3006	3	0	06	rep1	62	39	50	38	38	45	29	35	55	57	49	38	36	38	59	0	0	0	0	0	0	0	0	0	0	0	0	0	0	0	0	0	0	0	0
HAV_6344	HAV_6344_S130_R1_001.fastq.gz	Y2019	CML103	Ames 27081	ts	LN	S	sp1	spb1	3006	3	0	06	rep2	39	18	29	23	12	22	21	22	26	12	8	9	24	16	25	21	0	21	7	21	11	5	8	0	14	18	10	0	9	27	80	54	50	0	35
HAV_6345	HAV_6345_S75_R1_001.fastq.gz	Y2019	CML103	Ames 27081	ts	LN	S	sp1	spb1	3006	3	0	06	rep3	124	58	64	67	70	63	58	59	93	30	19	20	57	55	93	0	0	0	0	0	0	0	0	0	0	0	0	0	0	0	0	0	0	0	0
HAV_6346	HAV_6346_S83_R1_001.fastq.gz	Y2019	CML277	PI 595550	ts	LN	S	sp1	spb1	3008	3	0	08	rep1	9	3	5	1	8	6	5	5	8	35	25	19	6	2	5	0	0	0	0	0	0	0	0	0	0	0	0	0	0	0	0	0	0	0	0
HAV_6347	HAV_6347_S91_R1_001.fastq.gz	Y2019	CML277	PI 595550	ts	LN	S	sp1	spb1	3008	3	0	08	rep2	69	33	44	35	39	28	20	27	44	0	0	0	29	22	27	6	0	0	0	0	0	0	0	0	0	0	0	12	0	0	0	0	0	0	0
HAV_6348	HAV_6348_S99_R1_001.fastq.gz	Y2019	CML277	PI 595550	ts	LN	S	sp1	spb1	3008	3	0	08	rep3	237	112	137	104	133	148	112	116	150	16	7	12	123	131	176	15	0	14	0	0	0	0	0	0	13	15	0	13	0	19	0	0	0	0	0
HAV_6349	HAV_6349_S107_R1_001.fastq.gz	Y2019	Check_B73xMo17			LN	S	sp1	spb1	3010	3	0	10	rep1	153	64	107	68	86	94	79	90	109	54	33	29	76	69	96	14	0	16	0	0	13	0	0	0	18	0	0	12	7	10	0	0	0	0	0
HAV_6350	HAV_6350_S115_R1_001.fastq.gz	Y2019	Check_B73xMo17			LN	S	sp1	spb1	3010	3	0	10	rep2	57	33	34	36	44	35	23	31	33	0	0	0	30	28	48	0	0	9	0	0	0	0	0	0	0	10	0	15	0	9	0	0	0	0	0
HAV_6351	HAV_6351_S123_R1_001.fastq.gz	Y2019	Check_B73xMo17			LN	S	sp1	spb1	3010	3	0	10	rep3	428	229	308	204	295	297	234	268	310	0	0	0	215	229	362	0	0	0	0	0	0	0	0	0	0	0	0	0	0	0	0	0	0	0	0
HAV_6352	HAV_6352_S131_R1_001.fastq.gz	Y2019	38-11	Ames 26604	nss	LN	S	sp1	spb1	3012	3	0	12	rep1	60	33	42	29	47	38	28	39	49	20	15	20	22	26	43	0	0	12	0	10	9	0	16	0	22	10	5	21	0	16	52	0	0	0	0
HAV_6353	HAV_6353_S76_R1_001.fastq.gz	Y2019	38-11	Ames 26604	nss	LN	S	sp1	spb1	3012	3	0	12	rep2	27	21	14	16	18	13	16	16	20	40	41	40	11	19	24	0	0	0	0	0	13	0	0	0	0	0	0	0	0	0	0	0	0	0	0
HAV_6354	HAV_6354_S84_R1_001.fastq.gz	Y2019	38-11	Ames 26604	nss	LN	S	sp1	spb1	3012	3	0	12	rep3	90	61	72	45	67	59	49	61	78	38	39	37	67	62	52	0	0	11	0	0	3	10	0	0	0	20	0	11	0	11	48	0	0	0	0
HAV_6355	HAV_6355_S92_R1_001.fastq.gz	Y2019	Check_B73xMo17			LN	S	sp1	spb1	3014	3	0	14	rep1	51	16	28	19	26	23	20	27	17	10	7	6	19	18	27	0	0	0	0	0	0	0	0	0	0	0	0	0	0	0	0	0	0	0	0
HAV_6356	HAV_6356_S100_R1_001.fastq.gz	Y2019	Check_B73xMo17			LN	S	sp1	spb1	3014	3	0	14	rep2	107	51	59	49	58	55	50	45	67	46	46	28	49	39	62	14	9	18	18	17	12	0	12	15	23	21	15	18	18	14	29	23	13	0	0
HAV_6357	HAV_6357_S108_R1_001.fastq.gz	Y2019	Check_B73xMo17			LN	S	sp1	spb1	3014	3	0	14	rep3	53	12	22	14	30	28	26	14	30	26	13	13	12	20	24	0	0	0	0	0	0	0	0	0	0	0	0	0	0	0	0	0	0	0	0
HAV_6358	HAV_6358_S84_R1_001.fastq.gz	Y2019	Check_B73xMo17			LN	S	sp1	spb2	3015	3	0	15	rep1	194	84	136	101	137	153	105	108	154	219	151	147	99	133	155	0	0	10	11	0	0	0	14	0	11	0	0	0	8	11	32	0	0	0	0
HAV_6359	HAV_6359_S124_R1_001.fastq.gz	Y2019	Check_B73xMo17			LN	S	sp1	spb2	3015	3	0	15	rep2	48	29	27	29	29	27	22	27	33	20	22	9	33	23	33	0	0	0	0	0	0	0	0	0	0	0	0	0	0	0	0	0	0	0	0
HAV_6360	HAV_6360_S132_R1_001.fastq.gz	Y2019	Check_B73xMo17			LN	S	sp1	spb2	3015	3	0	15	rep3	87	42	68	44	73	64	42	45	60	59	33	37	36	46	69	0	0	21	0	0	0	0	0	0	0	10	0	0	0	0	0	0	0	0	0
HAV_6361	HAV_6361_S1_R1_001.fastq.gz	Y2019	NC320	Ames 27156	ts	LN	S	sp1	spb2	3017	3	0	17	rep1	80	49	47	45	48	34	38	46	51	44	41	38	40	37	73	0	0	0	0	0	12	0	0	0	0	0	0	0	0	16	0	0	0	0	0
HAV_6362	HAV_6362_S10_R1_001.fastq.gz	Y2019	NC320	Ames 27156	ts	LN	S	sp1	spb2	3017	3	0	17	rep2	80	49	41	26	40	55	32	39	57	70	56	48	32	32	52	0	0	0	0	0	0	0	0	0	0	0	0	0	0	0	0	0	0	0	0
HAV_6363	HAV_6363_S19_R1_001.fastq.gz	Y2019	NC320	Ames 27156	ts	LN	S	sp1	spb2	3017	3	0	17	rep3	134	65	62	45	88	68	65	59	83	138	98	95	58	60	89	0	0	0	0	0	0	0	0	0	0	8	0	0	0	0	66	0	0	0	0
HAV_6364	HAV_6364_S28_R1_001.fastq.gz	Y2019	Check_B73xMo17			LN	S	sp1	spb2	3020	3	0	20	rep1	0	0	0	0	0	13	0	0	24	19	0	0	0	0	6	0	0	0	0	0	0	0	0	0	0	0	0	0	0	0	81	0	0	0	0
HAV_6365	HAV_6365_S37_R1_001.fastq.gz	Y2019	Check_B73xMo17			LN	S	sp1	spb2	3020	3	0	20	rep2	20	12	19	7	28	14	7	20	16	1	4	6	19	10	9	0	0	0	0	0	0	0	0	0	0	0	0	0	0	0	0	0	0	0	0
HAV_6366	HAV_6366_S45_R1_001.fastq.gz	Y2019	Check_B73xMo17			LN	S	sp1	spb2	3020	3	0	20	rep3	11	11	8	5	5	8	2	11	8	46	28	18	11	11	12	0	0	0	0	0	0	0	0	0	0	0	0	0	0	0	0	0	0	0	0
HAV_6367	HAV_6367_S53_R1_001.fastq.gz	Y2019	F44	NSL 22893	mixed	LN	S	sp1	spb2	3021	3	0	21	rep1	30	18	12	12	10	25	16	13	20	55	29	43	11	9	29	14	11	8	20	12	8	0	13	0	14	16	11	10	17	27	62	0	0	0	0
HAV_6368	HAV_6368_S61_R1_001.fastq.gz	Y2019	F44	NSL 22893	mixed	LN	S	sp1	spb2	3021	3	0	21	rep2	60	34	30	25	42	43	41	37	42	60	39	33	36	15	41	0	0	0	0	0	0	0	0	0	0	0	0	0	0	0	0	0	64	0	0
HAV_6369	HAV_6369_S85_R1_001.fastq.gz	Y2019	F44	NSL 22893	mixed	LN	S	sp1	spb2	3021	3	0	21	rep3	55	40	47	29	51	40	37	39	57	13	4	10	42	42	58	4	0	0	0	0	0	0	0	0	7	12	0	0	0	22	57	0	0	0	0
HAV_6370	HAV_6370_S11_R1_001.fastq.gz	Y2019	M162W	Ames 27134	nss	LN	S	sp1	spb2	3024	3	0	24	rep1	45	16	20	11	15	30	15	10	18	50	42	29	21	18	19	11	0	0	0	6	0	0	11	0	10	9	0	11	0	15	77	0	0	0	0
HAV_6371	HAV_6371_S20_R1_001.fastq.gz	Y2019	M162W	Ames 27134	nss	LN	S	sp1	spb2	3024	3	0	24	rep2	14	17	12	4	15	9	7	17	9	14	20	15	8	10	8	0	0	0	0	0	0	0	0	0	0	0	0	0	0	0	0	0	0	0	0
HAV_6372	HAV_6372_S29_R1_001.fastq.gz	Y2019	M162W	Ames 27134	nss	LN	S	sp1	spb2	3024	3	0	24	rep3	26	16	21	12	14	13	9	20	12	11	24	9	12	10	25	0	0	0	0	0	0	0	0	0	16	0	0	0	0	0	0	0	0	0	0
HAV_6373	HAV_6373_S38_R1_001.fastq.gz	Y2019	CML69	Ames 28184	ts	LN	S	sp1	spb2	3025	3	0	25	rep1	45	25	29	15	21	34	26	26	28	9	9	4	21	17	31	0	0	0	0	0	0	0	0	0	0	0	0	0	0	0	0	0	0	0	0
HAV_6374	HAV_6374_S46_R1_001.fastq.gz	Y2019	CML69	Ames 28184	ts	LN	S	sp1	spb2	3025	3	0	25	rep2	36	22	33	15	17	16	24	20	25	9	7	3	10	16	25	0	0	0	0	0	0	0	0	0	0	0	0	0	0	0	33	8	25	0	14
HAV_6375	HAV_6375_S54_R1_001.fastq.gz	Y2019	CML69	Ames 28184	ts	LN	S	sp1	spb2	3025	3	0	25	rep3	31	16	17	26	22	32	11	15	24	36	30	36	18	18	31	0	0	12	0	9	0	0	0	0	10	7	0	8	13	11	0	0	0	0	0
HAV_6376	HAV_6376_S62_R1_001.fastq.gz	Y2019	DE811	PI 550558	mixed	LN	S	sp1	spb2	3027	3	0	27	rep1	19	18	9	13	11	12	12	11	11	47	22	38	19	13	19	0	0	0	0	0	0	0	0	0	0	0	0	0	0	0	0	0	0	0	0
HAV_6377	HAV_6377_S3_R1_001.fastq.gz	Y2019	DE811	PI 550558	mixed	LN	S	sp1	spb2	3027	3	0	27	rep2	38	12	16	15	19	16	16	19	17	10	9	10	22	13	16	0	0	0	0	0	0	0	0	0	0	0	0	0	0	0	36	0	0	0	0
HAV_6378	HAV_6378_S12_R1_001.fastq.gz	Y2019	DE811	PI 550558	mixed	LN	S	sp1	spb2	3027	3	0	27	rep3	40	24	26	10	20	18	23	25	31	244	161	157	22	22	24	0	0	11	10	8	6	0	18	0	16	18	0	14	13	0	0	0	91	0	0
HAV_6379	HAV_6379_S21_R1_001.fastq.gz	Y2019	H100	Ames 22748	ss	LN	S	sp1	spb3	3029	3	0	29	rep1	33	0	18	0	0	8	5	13	8	3	10	0	0	0	20	0	0	0	0	0	0	0	0	0	0	0	0	0	0	0	45	0	16	0	0
HAV_6380	HAV_6380_S30_R1_001.fastq.gz	Y2019	H100	Ames 22748	ss	LN	S	sp1	spb3	3029	3	0	29	rep2	11	15	9	15	11	9	14	9	12	32	41	28	8	9	16	0	0	5	0	0	0	0	0	0	0	0	0	16	0	11	57	33	43	27	23
HAV_6381	HAV_6381_S39_R1_001.fastq.gz	Y2019	H100	Ames 22748	ss	LN	S	sp1	spb3	3029	3	0	29	rep3	43	25	24	9	28	24	10	19	27	38	30	35	9	18	20	0	0	0	0	0	0	0	0	0	0	0	0	0	0	0	57	37	34	10	30
HAV_6382	HAV_6382_S47_R1_001.fastq.gz	Y2019	MO1W	PI 558520	nss	LN	S	sp1	spb3	3032	3	0	32	rep1	20	17	12	3	14	14	12	11	22	26	21	16	11	14	17	0	0	0	0	0	0	0	0	0	0	0	0	0	0	0	0	0	0	0	0
HAV_6383	HAV_6383_S55_R1_001.fastq.gz	Y2019	MO1W	PI 558520	nss	LN	S	sp1	spb3	3032	3	0	32	rep2	87	24	40	23	41	44	46	50	48	24	23	23	39	28	55	12	7	19	18	11	13	0	13	0	11	10	6	18	21	16	0	0	0	0	0
HAV_6384	HAV_6384_S63_R1_001.fastq.gz	Y2019	MO1W	PI 558520	nss	LN	S	sp1	spb3	3032	3	0	32	rep3	32	20	28	10	18	20	16	20	22	35	25	11	22	10	27	0	0	0	0	0	0	0	0	0	0	0	0	0	0	0	0	0	0	0	0
HAV_6385	HAV_6385_S4_R1_001.fastq.gz	Y2019	TZI18	PI 506253	ts	LN	S	sp1	spb3	3034	3	0	34	rep1	16	10	14	3	6	9	9	11	12	10	13	5	8	7	10	11	0	24	0	10	0	0	17	0	23	9	0	5	0	9	0	0	0	0	0
HAV_6386	HAV_6386_S13_R1_001.fastq.gz	Y2019	TZI18	PI 506253	ts	LN	S	sp1	spb3	3034	3	0	34	rep2	50	28	19	15	43	30	31	33	40	48	37	26	16	27	29	19	9	22	20	13	20	5	22	0	26	29	18	28	15	25	0	0	0	0	0
HAV_6387	HAV_6387_S22_R1_001.fastq.gz	Y2019	TZI18	PI 506253	ts	LN	S	sp1	spb3	3034	3	0	34	rep3	29	19	18	10	27	16	10	28	15	9	11	2	20	12	18	31	0	15	0	0	0	0	27	0	15	17	0	11	19	13	0	0	0	0	0
HAV_6388	HAV_6388_S31_R1_001.fastq.gz	Y2019	TZI8	PI 506246	ts	LN	S	sp1	spb3	3035	3	0	35	rep1	61	34	34	22	45	36	25	37	46	74	68	49	35	25	47	23	13	11	0	11	10	11	15	0	21	19	9	17	14	16	0	0	0	0	0
HAV_6389	HAV_6389_S40_R1_001.fastq.gz	Y2019	TZI8	PI 506246	ts	LN	S	sp1	spb3	3035	3	0	35	rep2	79	48	51	29	54	52	27	44	54	126	86	75	35	33	57	25	13	24	17	0	22	8	26	0	20	16	0	30	16	32	0	0	0	0	0
HAV_6390	HAV_6390_S48_R1_001.fastq.gz	Y2019	TZI8	PI 506246	ts	LN	S	sp1	spb3	3035	3	0	35	rep3	43	15	12	13	18	18	21	18	22	144	128	72	13	14	27	0	0	0	0	0	0	0	0	0	0	0	0	0	0	0	0	0	0	0	0
HAV_6391	HAV_6391_S56_R1_001.fastq.gz	Y2019	Check_B73xMo17			LN	S	sp1	spb3	3038	3	0	38	rep1	136	76	55	45	75	59	44	48	59	34	24	16	58	38	88	10	13	19	20	0	16	7	15	0	22	26	0	32	11	35	0	0	0	0	0
HAV_6392	HAV_6392_S64_R1_001.fastq.gz	Y2019	Check_B73xMo17			LN	S	sp1	spb3	3038	3	0	38	rep2	62	38	37	30	48	41	30	25	50	9	5	3	36	29	40	18	7	21	9	19	15	0	27	0	15	22	24	11	12	34	0	0	0	0	0
HAV_6393	HAV_6393_S5_R1_001.fastq.gz	Y2019	Check_B73xMo17			LN	S	sp1	spb3	3038	3	0	38	rep3	95	48	39	34	40	32	29	30	46	8	4	9	35	27	50	0	0	0	0	0	0	0	0	0	0	0	0	0	0	0	0	0	0	0	0
HAV_6394	HAV_6394_S14_R1_001.fastq.gz	Y2019	HY	Ames 26808	nss	LN	S	sp1	spb3	3040	3	0	40	rep1	95	72	85	49	80	81	61	74	92	33	28	19	62	46	67	23	13	18	18	25	24	16	27	13	29	23	19	36	20	41	0	0	0	0	0
HAV_6395	HAV_6395_S23_R1_001.fastq.gz	Y2019	HY	Ames 26808	nss	LN	S	sp1	spb3	3040	3	0	40	rep2	150	95	76	53	74	90	54	61	90	26	13	18	60	60	103	0	0	0	0	0	0	0	0	0	0	0	0	0	0	0	73	0	0	0	0
HAV_6396	HAV_6396_S32_R1_001.fastq.gz	Y2019	HY	Ames 26808	nss	LN	S	sp1	spb3	3040	3	0	40	rep3	419	284	229	184	249	256	226	246	272	84	68	76	192	208	313	0	0	0	0	0	0	0	0	0	0	0	0	0	0	0	59	25	46	20	35
HAV_6397	HAV_6397_S41_R1_001.fastq.gz	Y2019	F2	PI 257506	mixed	LN	S	sp1	spb3	3042	3	0	42	rep1	132	78	80	46	89	61	47	49	68	149	102	73	42	56	83	0	0	0	0	0	0	0	0	0	0	0	0	0	0	8	72	24	36	19	23
HAV_6398	HAV_6398_S49_R1_001.fastq.gz	Y2019	F2	PI 257506	mixed	LN	S	sp1	spb3	3042	3	0	42	rep2	140	60	70	60	66	75	54	62	70	65	60	53	66	46	80	0	0	8	0	0	0	0	0	0	0	12	0	0	0	0	37	0	35	0	0
HAV_6399	HAV_6399_S57_R1_001.fastq.gz	Y2019	F2	PI 257506	mixed	LN	S	sp1	spb3	3042	3	0	42	rep3	165	94	112	71	82	100	84	91	97	11	13	6	79	79	132	0	0	0	0	0	0	0	0	0	0	0	0	0	0	0	0	0	0	0	0
HAV_6400	HAV_6400_S65_R1_001.fastq.gz	Y2019	A188	Ames 22443	nss	LN	S	sp2	spb1	3044	3	0	44	rep1	51	33	39	18	38	26	32	41	44	51	34	31	26	28	42	0	0	0	0	0	0	0	0	0	0	0	0	0	0	0	29	0	0	0	0
HAV_6401	HAV_6401_S86_R1_001.fastq.gz	Y2019	A188	Ames 22443	nss	LN	S	sp2	spb1	3044	3	0	44	rep2	73	49	31	25	47	39	35	30	43	8	6	6	26	24	48	0	0	0	0	0	0	0	0	0	0	0	0	0	0	0	0	0	0	0	0
HAV_6402	HAV_6402_S15_R1_001.fastq.gz	Y2019	A188	Ames 22443	nss	LN	S	sp2	spb1	3044	3	0	44	rep3	0	0	0	0	0	0	0	0	0	0	0	0	26	29	0	0	0	0	0	0	0	0	0	0	0	0	0	0	0	0	123	66	94	31	58
HAV_6403	HAV_6403_S24_R1_001.fastq.gz	Y2019	CH9	Ames 27068	nss	LN	S	sp2	spb1	3045	3	0	45	rep1	59	40	32	27	45	30	32	42	59	16	16	8	35	35	52	12	0	11	11	13	0	0	9	0	7	11	13	10	11	14	0	0	0	0	0
HAV_6404	HAV_6404_S33_R1_001.fastq.gz	Y2019	CH9	Ames 27068	nss	LN	S	sp2	spb1	3045	3	0	45	rep2	42	27	23	10	26	16	28	12	28	2	5	7	11	12	32	34	0	26	17	13	19	17	17	9	27	26	13	26	11	34	22	27	17	0	17
HAV_6405	HAV_6405_S42_R1_001.fastq.gz	Y2019	CH9	Ames 27068	nss	LN	S	sp2	spb1	3045	3	0	45	rep3	278	163	179	128	162	183	168	175	253	72	45	52	146	129	202	25	0	17	9	24	17	0	0	6	18	16	12	21	18	25	0	0	0	0	0
HAV_6406	HAV_6406_S50_R1_001.fastq.gz	Y2019	A682	PI 587143	nss	LN	S	sp2	spb1	3047	3	0	47	rep1	39	29	28	21	19	26	26	22	24	17	24	17	17	21	23	6	9	9	9	11	8	0	11	0	9	19	0	11	0	18	0	0	0	0	0
HAV_6407	HAV_6407_S58_R1_001.fastq.gz	Y2019	A682	PI 587143	nss	LN	S	sp2	spb1	3047	3	0	47	rep2	813	518	478	291	493	467	423	430	561	0	0	0	370	357	544	0	0	0	0	0	0	0	0	0	0	0	0	0	0	0	0	0	0	0	0
HAV_6408	HAV_6408_S66_R1_001.fastq.gz	Y2019	A682	PI 587143	nss	LN	S	sp2	spb1	3047	3	0	47	rep3	85	53	61	31	32	60	40	32	78	26	10	31	36	45	56	0	0	0	0	0	0	0	0	0	0	0	0	0	0	0	0	0	0	0	0
HAV_6409	HAV_6409_S7_R1_001.fastq.gz	Y2019	Check_B73xMo17			LN	S	sp2	spb1	3049	3	0	49	rep1	84	52	42	32	62	44	40	45	56	7	7	5	26	30	54	12	0	0	10	13	0	0	0	0	16	0	8	0	0	0	0	0	91	0	0
HAV_6410	HAV_6410_S16_R1_001.fastq.gz	Y2019	Check_B73xMo17			LN	S	sp2	spb1	3049	3	0	49	rep2	29	20	26	11	37	15	12	31	22	0	0	0	22	12	37	0	0	0	0	0	0	0	0	0	0	0	0	0	0	0	0	0	0	0	0
HAV_6411	HAV_6411_S25_R1_001.fastq.gz	Y2019	Check_B73xMo17			LN	S	sp2	spb1	3049	3	0	49	rep3	114	54	62	42	72	77	63	87	84	9	5	3	67	58	101	0	0	0	0	0	0	0	0	0	0	9	0	0	0	0	0	0	0	0	0
HAV_6412	HAV_6412_S34_R1_001.fastq.gz	Y2019	A641	Ames 19311	mixed	LN	S	sp2	spb1	3052	3	0	52	rep1	34	26	23	13	31	33	28	34	32	3	9	3	18	22	45	0	0	0	0	0	0	0	0	0	0	0	0	13	0	0	72	0	0	0	0
HAV_6413	HAV_6413_S43_R1_001.fastq.gz	Y2019	A641	Ames 19311	mixed	LN	S	sp2	spb1	3052	3	0	52	rep2	95	64	57	49	64	53	47	55	67	19	14	16	50	61	75	0	0	0	0	0	0	0	0	0	0	0	0	0	0	0	50	0	0	0	0
HAV_6414	HAV_6414_S51_R1_001.fastq.gz	Y2019	A641	Ames 19311	mixed	LN	S	sp2	spb1	3052	3	0	52	rep3	30	17	22	21	10	18	17	17	21	14	14	3	12	13	13	0	0	0	0	0	0	0	0	0	0	0	0	0	0	0	140	68	77	39	53
HAV_6415	HAV_6415_S59_R1_001.fastq.gz	Y2019	A556	Ames 23450	nss	LN	S	sp2	spb1	3054	3	0	54	rep1	483	267	237	178	290	264	249	243	331	7	4	6	197	228	338	0	0	0	0	0	0	0	0	0	0	0	0	0	0	0	0	0	0	0	0
HAV_6416	HAV_6416_S67_R1_001.fastq.gz	Y2019	A556	Ames 23450	nss	LN	S	sp2	spb1	3054	3	0	54	rep2	228	147	133	108	149	168	132	125	190	0	0	0	126	126	168	10	0	0	0	16	0	0	0	0	0	14	0	19	0	14	53	0	0	0	0
HAV_6417	HAV_6417_S8_R1_001.fastq.gz	Y2019	A556	Ames 23450	nss	LN	S	sp2	spb1	3054	3	0	54	rep3	509	311	309	186	302	295	226	237	334	10	7	3	231	241	319	0	0	0	0	0	0	0	0	0	0	0	0	0	0	0	20	34	19	0	0
HAV_6418	HAV_6418_S17_R1_001.fastq.gz	Y2019	CM105	PI 587124	ss	LN	S	sp2	spb1	3055	3	0	55	rep1	76	55	42	43	47	59	43	55	59	22	21	11	55	42	53	0	0	0	0	0	0	0	0	0	9	0	0	13	0	0	55	0	0	0	0
HAV_6419	HAV_6419_S26_R1_001.fastq.gz	Y2019	CM105	PI 587124	ss	LN	S	sp2	spb1	3055	3	0	55	rep2	67	49	39	35	43	30	32	23	54	3	2	2	34	29	54	0	0	0	0	0	0	0	0	0	0	0	0	0	0	0	20	0	41	0	0
HAV_6420	HAV_6420_S35_R1_001.fastq.gz	Y2019	CM105	PI 587124	ss	LN	S	sp2	spb1	3055	3	0	55	rep3	441	258	249	180	220	273	208	208	317	0	0	0	222	185	304	0	0	0	0	0	0	0	0	0	0	0	0	0	0	0	0	0	0	0	0
HAV_6421	HAV_6421_S44_R1_001.fastq.gz	Y2019	MEF156-55-2	Ames 27135	nss	LN	S	sp2	spb2	3057	3	0	57	rep1	65	39	55	27	59	50	49	54	52	15	12	11	28	51	37	0	0	0	0	0	0	0	0	0	0	0	0	0	0	0	93	0	0	0	0
HAV_6422	HAV_6422_S85_R1_001.fastq.gz	Y2019	MEF156-55-2	Ames 27135	nss	LN	S	sp2	spb2	3057	3	0	57	rep2	126	79	93	62	82	89	79	66	88	0	0	0	64	64	90	0	0	0	0	0	0	0	0	0	0	0	0	0	0	0	59	20	45	0	19
HAV_6423	HAV_6423_S60_R1_001.fastq.gz	Y2019	MEF156-55-2	Ames 27135	nss	LN	S	sp2	spb2	3057	3	0	57	rep3	148	74	78	66	105	79	68	68	86	42	27	31	69	52	93	0	0	0	0	0	0	0	0	0	0	0	0	13	0	19	0	0	0	0	0
HAV_6424	HAV_6424_S68_R1_001.fastq.gz	Y2019	MT42	Ames 20140	mixed	LN	S	sp2	spb2	3059	3	0	59	rep1	264	156	145	88	137	160	105	139	173	10	12	15	96	116	166	0	0	11	13	0	14	0	14	0	15	0	0	15	13	12	0	0	0	0	0
HAV_6425	HAV_6425_S69_R1_001.fastq.gz	Y2019	MT42	Ames 20140	mixed	LN	S	sp2	spb2	3059	3	0	59	rep2	198	110	135	82	116	125	85	106	145	10	13	9	95	71	125	0	0	0	0	0	0	0	0	0	0	0	0	0	0	0	0	0	0	0	0
HAV_6426	HAV_6426_S77_R1_001.fastq.gz	Y2019	MT42	Ames 20140	mixed	LN	S	sp2	spb2	3059	3	0	59	rep3	275	161	193	135	180	185	153	164	208	6	16	6	155	141	227	0	0	0	0	0	0	0	0	0	0	0	0	0	0	0	48	0	0	0	0
HAV_6427	HAV_6427_S52_R1_001.fastq.gz	Y2019	MO47	PI 583352	mixed	LN	S	sp2	spb2	3062	3	0	62	rep1	263	146	180	109	153	210	150	129	187	22	12	19	117	125	198	0	0	0	0	0	0	0	0	0	0	0	0	0	0	0	0	0	0	0	0
HAV_6428	HAV_6428_S93_R1_001.fastq.gz	Y2019	MO47	PI 583352	mixed	LN	S	sp2	spb2	3062	3	0	62	rep2	14	18	13	6	17	12	12	10	26	131	103	99	11	5	25	0	0	0	0	0	0	0	0	0	0	0	0	0	0	0	41	0	0	0	0
HAV_6429	HAV_6429_S101_R1_001.fastq.gz	Y2019	MO47	PI 583352	mixed	LN	S	sp2	spb2	3062	3	0	62	rep3	606	358	387	241	350	433	327	316	426	9	9	11	276	313	472	0	0	0	0	0	0	0	0	0	0	0	0	0	0	0	74	29	54	15	38
HAV_6430	HAV_6430_S109_R1_001.fastq.gz	Y2019	Check_B73xMo17			LN	S	sp2	spb2	3064	3	0	64	rep1	31	0	19	10	8	15	14	12	12	0	6	2	20	0	27	0	0	0	0	0	0	0	0	0	0	0	0	0	0	0	24	0	64	0	0
HAV_6431	HAV_6431_S117_R1_001.fastq.gz	Y2019	Check_B73xMo17			LN	S	sp2	spb2	3064	3	0	64	rep2	72	33	35	35	64	37	37	37	46	39	33	26	19	30	64	11	13	12	16	0	6	0	6	0	14	19	9	17	8	19	0	0	0	0	0
HAV_6432	HAV_6432_S125_R1_001.fastq.gz	Y2019	Check_B73xMo17			LN	S	sp2	spb2	3064	3	0	64	rep3	59	44	40	28	46	40	37	38	32	16	12	13	29	30	38	0	0	0	0	0	0	0	0	0	0	0	0	0	0	0	0	0	0	0	0
HAV_6433	HAV_6433_S87_R1_001.fastq.gz	Y2019	H99	PI 587129	nss	LN	S	sp2	spb2	3065	3	0	65	rep1	76	32	41	35	31	48	34	48	61	0	0	0	36	35	47	0	0	12	0	0	7	0	0	0	13	22	0	12	0	7	0	0	0	0	0
HAV_6434	HAV_6434_S78_R1_001.fastq.gz	Y2019	H99	PI 587129	nss	LN	S	sp2	spb2	3065	3	0	65	rep2	125	51	58	36	60	50	47	44	73	1	5	3	33	34	73	0	0	0	0	0	0	0	0	0	0	0	0	0	0	0	55	42	65	18	44
HAV_6435	HAV_6435_S86_R1_001.fastq.gz	Y2019	H99	PI 587129	nss	LN	S	sp2	spb2	3065	3	0	65	rep3	90	63	61	55	79	64	46	71	75	3	5	0	52	49	62	0	0	12	0	0	0	0	0	0	0	10	0	0	0	0	37	0	0	0	0
HAV_6436	HAV_6436_S94_R1_001.fastq.gz	Y2019	H105W	PI 587127	mixed	LN	S	sp2	spb2	3068	3	0	68	rep1	86	36	39	30	44	39	61	36	49	0	0	0	25	23	49	0	0	0	0	0	0	0	0	0	0	0	0	0	0	0	0	0	0	0	0
HAV_6437	HAV_6437_S102_R1_001.fastq.gz	Y2019	H105W	PI 587127	mixed	LN	S	sp2	spb2	3068	3	0	68	rep2	29	14	15	19	10	15	16	19	16	13	9	7	7	12	14	0	0	0	0	0	0	0	0	0	0	0	0	0	0	0	0	0	0	0	0
HAV_6438	HAV_6438_S110_R1_001.fastq.gz	Y2019	H105W	PI 587127	mixed	LN	S	sp2	spb2	3068	3	0	68	rep3	156	74	101	61	91	72	78	55	97	34	17	18	76	64	79	12	0	20	15	14	16	0	16	0	0	17	0	0	0	18	0	0	0	0	0
HAV_6439	HAV_6439_S118_R1_001.fastq.gz	Y2019	Check_B73xMo17			LN	S	sp2	spb2	3069	3	0	69	rep1	97	59	50	44	60	68	38	53	86	7	5	3	35	41	60	18	0	5	11	13	9	6	10	0	20	16	14	13	8	8	0	0	0	0	0
HAV_6440	HAV_6440_S126_R1_001.fastq.gz	Y2019	Check_B73xMo17			LN	S	sp2	spb2	3069	3	0	69	rep2	93	42	26	22	48	46	16	40	57	12	11	7	34	21	40	14	0	9	11	28	0	0	0	0	19	12	18	13	13	18	0	0	0	0	0
HAV_6441	HAV_6441_S71_R1_001.fastq.gz	Y2019	Check_B73xMo17			LN	S	sp2	spb2	3069	3	0	69	rep3	46	23	18	17	32	30	19	19	40	59	47	43	24	14	45	0	0	0	0	0	5	0	0	0	11	0	0	0	12	0	0	0	0	0	0
HAV_6442	HAV_6442_S79_R1_001.fastq.gz	Y2019	NC268	PI 587145	ss	LN	S	sp2	spb3	3072	3	0	72	rep1	82	68	67	53	59	58	57	49	77	12	8	2	49	46	90	0	0	13	0	0	0	0	0	0	0	8	10	14	9	15	0	0	0	0	0
HAV_6443	HAV_6443_S87_R1_001.fastq.gz	Y2019	NC268	PI 587145	ss	LN	S	sp2	spb3	3072	3	0	72	rep2	66	34	36	32	54	38	41	32	61	7	11	6	40	34	55	0	0	0	0	0	0	0	0	0	0	0	0	0	0	0	0	0	0	0	0
HAV_6444	HAV_6444_S95_R1_001.fastq.gz	Y2019	NC268	PI 587145	ss	LN	S	sp2	spb3	3072	3	0	72	rep3	26	20	27	8	18	22	19	13	29	39	15	18	21	14	20	0	9	0	17	10	10	0	0	0	13	10	0	0	6	14	0	0	0	0	0
HAV_6445	HAV_6445_S103_R1_001.fastq.gz	Y2019	NC332	Ames 27162	ts	LN	S	sp2	spb3	3073	3	0	73	rep1	49	37	39	20	37	47	20	28	39	19	11	18	26	23	35	0	0	0	0	0	0	0	0	0	0	0	0	0	0	0	0	0	0	0	0
HAV_6446	HAV_6446_S111_R1_001.fastq.gz	Y2019	NC332	Ames 27162	ts	LN	S	sp2	spb3	3073	3	0	73	rep2	43	33	34	13	24	29	24	13	32	72	44	48	20	21	27	0	0	0	0	0	0	0	0	0	0	0	0	0	0	0	0	0	0	0	0
HAV_6447	HAV_6447_S119_R1_001.fastq.gz	Y2019	NC332	Ames 27162	ts	LN	S	sp2	spb3	3073	3	0	73	rep3	271	145	143	87	181	168	123	132	180	84	66	66	132	112	194	23	23	26	13	22	28	13	25	0	22	30	16	37	22	30	37	0	0	0	23
HAV_6448	HAV_6448_S127_R1_001.fastq.gz	Y2019	W153R	PI 587154	nss	LN	S	sp2	spb3	3075	3	0	75	rep1	38	13	12	18	23	20	15	18	23	97	50	60	21	10	13	12	0	16	8	16	14	0	14	0	0	14	8	8	0	12	0	0	0	0	0
HAV_6449	HAV_6449_S72_R1_001.fastq.gz	Y2019	W153R	PI 587154	nss	LN	S	sp2	spb3	3075	3	0	75	rep2	114	63	58	44	50	66	50	44	63	26	12	17	50	43	68	14	13	29	17	20	17	8	16	0	25	25	17	23	15	17	0	0	0	0	0
HAV_6450	HAV_6450_S80_R1_001.fastq.gz	Y2019	W153R	PI 587154	nss	LN	S	sp2	spb3	3075	3	0	75	rep3	59	33	33	43	40	40	29	32	50	16	8	12	32	30	43	0	0	12	0	0	0	0	0	0	0	0	0	0	0	0	102	63	74	29	63
HAV_6451	HAV_6451_S88_R1_001.fastq.gz	Y2019	ND246	PI 550490	mixed	LN	S	sp2	spb3	3077	3	0	77	rep1	28	18	17	17	20	30	25	20	25	17	10	10	19	10	25	19	0	29	8	11	7	0	10	0	13	21	12	20	0	25	0	0	0	0	0
HAV_6452	HAV_6452_S96_R1_001.fastq.gz	Y2019	ND246	PI 550490	mixed	LN	S	sp2	spb3	3077	3	0	77	rep2	61	31	29	18	33	32	26	17	33	0	0	0	22	23	35	0	0	0	0	0	0	0	0	0	0	0	0	0	0	0	0	0	52	0	0
HAV_6453	HAV_6453_S104_R1_001.fastq.gz	Y2019	ND246	PI 550490	mixed	LN	S	sp2	spb3	3077	3	0	77	rep3	237	121	149	112	147	148	127	116	163	6	2	4	119	108	157	0	0	0	0	0	0	0	0	0	0	0	0	0	0	0	70	0	0	0	0
HAV_6454	HAV_6454_S112_R1_001.fastq.gz	Y2019	P39	Ames 28186	sweet	LN	S	sp2	spb3	3080	3	0	80	rep1	60	32	32	28	43	41	32	31	35	63	47	50	26	28	43	0	0	0	0	0	0	0	0	0	0	0	0	0	0	0	17	0	0	0	0
HAV_6455	HAV_6455_S120_R1_001.fastq.gz	Y2019	P39	Ames 28186	sweet	LN	S	sp2	spb3	3080	3	0	80	rep2	87	32	71	46	63	56	47	36	53	9	6	10	46	33	67	6	0	16	0	0	11	0	0	0	14	10	0	7	0	0	45	41	32	0	33
HAV_6456	HAV_6456_S128_R1_001.fastq.gz	Y2019	P39	Ames 28186	sweet	LN	S	sp2	spb3	3080	3	0	80	rep3	26	19	20	14	25	14	19	16	22	95	78	67	17	15	22	0	0	0	0	0	0	0	0	0	0	0	0	0	0	0	0	0	59	0	0
HAV_6457	HAV_6457_S73_R1_001.fastq.gz	Y2019	VA59	Ames 19016	nss	LN	S	sp2	spb3	3081	3	0	81	rep1	20	4	9	4	3	7	6	10	13	121	85	82	3	7	17	0	0	13	0	0	9	0	0	0	9	0	1	0	0	0	0	0	0	0	0
HAV_6458	HAV_6458_S81_R1_001.fastq.gz	Y2019	VA59	Ames 19016	nss	LN	S	sp2	spb3	3081	3	0	81	rep2	22	15	14	9	13	24	12	14	20	93	68	75	14	9	19	0	0	0	0	0	0	0	0	0	0	0	0	0	0	0	76	0	0	0	0
HAV_6459	HAV_6459_S89_R1_001.fastq.gz	Y2019	VA59	Ames 19016	nss	LN	S	sp2	spb3	3081	3	0	81	rep3	66	38	62	26	39	37	38	45	57	6	3	2	32	32	38	0	0	9	0	0	18	0	0	0	9	11	0	12	0	14	0	0	0	0	0
HAV_6460	HAV_6460_S97_R1_001.fastq.gz	Y2019	SD44	PI 524969	nss	LN	S	sp2	spb3	3084	3	0	84	rep1	68	34	40	25	40	43	45	31	60	0	0	0	22	22	64	0	0	0	0	0	0	0	0	0	0	0	0	0	0	0	0	0	0	0	0
HAV_6461	HAV_6461_S105_R1_001.fastq.gz	Y2019	SD44	PI 524969	nss	LN	S	sp2	spb3	3084	3	0	84	rep2	52	21	33	20	20	22	19	29	30	0	0	0	16	16	27	0	0	35	0	0	0	0	15	0	14	10	0	11	0	13	0	0	0	0	0
HAV_6462	HAV_6462_S113_R1_001.fastq.gz	Y2019	SD44	PI 524969	nss	LN	S	sp2	spb3	3084	3	0	84	rep3	118	80	86	47	84	86	58	57	99	0	0	0	63	69	106	0	0	0	0	0	0	0	0	0	0	11	0	0	0	0	118	68	74	29	45
HAV_6463	HAV_6463_S121_R1_001.fastq.gz	Y2019	CML108	Ames 27082	ts	LN	S	sp1	spb1	3102	3	1	02	rep1	84	54	65	35	58	52	50	43	65	86	73	48	45	32	71	9	0	24	0	14	6	0	12	0	26	27	16	25	10	22	0	0	0	0	0
HAV_6464	HAV_6464_S129_R1_001.fastq.gz	Y2019	CML108	Ames 27082	ts	LN	S	sp1	spb1	3102	3	1	02	rep2	47	22	20	0	14	20	14	22	23	4	8	2	15	16	26	0	0	0	0	0	0	0	0	0	9	0	0	0	0	0	0	0	0	0	0
HAV_6465	HAV_6465_S74_R1_001.fastq.gz	Y2019	CML108	Ames 27082	ts	LN	S	sp1	spb1	3102	3	1	02	rep3	161	86	76	57	68	75	72	69	84	37	36	26	73	56	96	0	0	0	0	0	0	0	0	0	0	0	0	0	0	0	0	0	0	0	0
HAV_6466	HAV_6466_S82_R1_001.fastq.gz	Y2019	Check_B73xMo17			LN	S	sp1	spb1	3103	3	1	03	rep1	76	31	42	37	36	52	40	53	63	41	15	21	38	37	54	30	20	44	31	35	37	19	27	11	31	35	18	35	22	38	52	0	0	6	0
HAV_6467	HAV_6467_S90_R1_001.fastq.gz	Y2019	Check_B73xMo17			LN	S	sp1	spb1	3103	3	1	03	rep2	39	19	16	19	24	28	29	19	28	36	22	14	22	16	31	0	0	0	0	0	0	0	0	0	0	19	8	0	0	0	30	31	23	0	0
HAV_6468	HAV_6468_S98_R1_001.fastq.gz	Y2019	Check_B73xMo17			LN	S	sp1	spb1	3103	3	1	03	rep3	110	69	71	50	72	85	73	64	101	186	130	126	63	74	103	0	0	0	0	0	0	0	0	0	0	0	0	0	0	0	0	0	0	0	0
HAV_6469	HAV_6469_S106_R1_001.fastq.gz	Y2019	Check_B73xMo17			LN	S	sp1	spb1	3105	3	1	05	rep1	75	34	48	34	38	52	34	53	60	57	30	32	41	28	60	0	0	0	0	0	0	0	0	0	0	0	0	0	0	0	0	0	0	0	0
HAV_6470	HAV_6470_S114_R1_001.fastq.gz	Y2019	Check_B73xMo17			LN	S	sp1	spb1	3105	3	1	05	rep2	69	36	44	37	60	49	34	40	58	19	17	9	38	39	54	0	0	0	0	0	0	0	0	0	0	0	0	0	0	0	0	0	0	0	0
HAV_6471	HAV_6471_S122_R1_001.fastq.gz	Y2019	Check_B73xMo17			LN	S	sp1	spb1	3105	3	1	05	rep3	124	81	73	52	74	84	72	64	97	20	11	11	60	61	99	0	0	0	0	0	0	0	0	0	0	0	0	0	0	0	0	0	0	0	0
HAV_6472	HAV_6472_S130_R1_001.fastq.gz	Y2019	Check_B73xMo17			LN	S	sp1	spb1	3108	3	1	08	rep1	0	0	0	0	24	0	31	0	0	0	0	0	0	0	0	0	0	0	0	0	0	0	0	0	0	0	0	0	0	0	0	0	0	0	0
HAV_6473	HAV_6473_S75_R1_001.fastq.gz	Y2019	Check_B73xMo17			LN	S	sp1	spb1	3108	3	1	08	rep2	57	0	27	13	23	19	10	16	20	0	0	0	11	25	24	0	0	0	0	0	0	0	0	0	0	0	0	0	0	0	83	0	0	0	0
HAV_6474	HAV_6474_S83_R1_001.fastq.gz	Y2019	Check_B73xMo17			LN	S	sp1	spb1	3108	3	1	08	rep3	97	38	46	33	57	55	46	58	64	38	33	34	41	50	59	0	0	0	0	0	0	0	0	0	0	0	0	0	0	0	0	0	0	0	0
HAV_6475	HAV_6475_S91_R1_001.fastq.gz	Y2019	Check_B73xMo17			LN	S	sp1	spb1	3109	3	1	09	rep1	63	0	43	0	0	0	0	17	23	0	0	0	0	0	0	0	0	0	0	0	0	0	0	0	0	0	0	0	0	0	0	0	0	0	0
HAV_6476	HAV_6476_S99_R1_001.fastq.gz	Y2019	Check_B73xMo17			LN	S	sp1	spb1	3109	3	1	09	rep2	20	13	6	6	14	10	10	5	11	5	3	6	7	15	10	0	0	0	0	0	0	0	0	0	0	0	0	0	0	0	0	0	0	0	0
HAV_6477	HAV_6477_S107_R1_001.fastq.gz	Y2019	Check_B73xMo17			LN	S	sp1	spb1	3109	3	1	09	rep3	75	52	56	39	52	62	21	46	51	48	26	28	39	43	63	0	0	0	0	0	0	0	0	0	0	0	0	0	0	0	74	0	0	0	0
HAV_6478	HAV_6478_S88_R1_001.fastq.gz	Y2019	B68	PI 550465	ss	LN	S	sp1	spb1	3112	3	1	12	rep1	82	40	49	46	47	54	29	64	69	3	7	5	29	24	71	0	0	0	0	0	0	0	0	0	0	0	0	0	0	0	0	0	0	0	0
HAV_6479	HAV_6479_S123_R1_001.fastq.gz	Y2019	B68	PI 550465	ss	LN	S	sp1	spb1	3112	3	1	12	rep2	83	49	66	34	71	48	51	49	75	11	9	7	36	39	70	0	0	0	0	0	0	0	0	0	0	0	0	0	0	0	0	0	0	0	0
HAV_6480	HAV_6480_S89_R1_001.fastq.gz	Y2019	B68	PI 550465	ss	LN	S	sp1	spb1	3112	3	1	12	rep3	44	13	32	17	33	27	27	30	35	109	90	79	19	19	34	0	0	12	0	14	11	0	0	0	12	17	0	0	8	0	51	26	37	0	39
HAV_6481	HAV_6481_S76_R1_001.fastq.gz	Y2019	Check_B73xMo17			LN	S	sp1	spb1	3114	3	1	14	rep1	36	27	29	24	22	19	21	33	23	13	4	7	8	22	29	0	0	6	0	0	11	0	0	0	0	15	0	0	0	0	0	0	0	0	0
HAV_6482	HAV_6482_S84_R1_001.fastq.gz	Y2019	Check_B73xMo17			LN	S	sp1	spb1	3114	3	1	14	rep2	58	42	28	19	31	25	12	28	34	33	29	15	21	17	31	0	0	0	0	0	0	0	0	0	0	0	0	0	0	0	0	0	0	0	0
HAV_6483	HAV_6483_S92_R1_001.fastq.gz	Y2019	Check_B73xMo17			LN	S	sp1	spb1	3114	3	1	14	rep3	41	0	24	11	27	17	21	22	14	0	0	0	20	11	16	0	0	0	0	0	0	0	0	0	0	0	0	0	0	0	0	0	0	0	6
HAV_6484	HAV_6484_S100_R1_001.fastq.gz	Y2019	NC340	Ames 27166	ts	LN	S	sp1	spb2	3115	3	1	15	rep1	66	24	30	27	27	40	20	27	42	31	21	20	22	39	42	0	0	0	0	0	0	0	0	0	0	0	0	0	0	0	0	0	33	0	0
HAV_6485	HAV_6485_S108_R1_001.fastq.gz	Y2019	NC340	Ames 27166	ts	LN	S	sp1	spb2	3115	3	1	15	rep2	21	18	17	11	18	18	12	23	19	10	7	7	16	12	24	0	0	0	0	0	0	0	0	0	0	0	0	0	0	0	18	0	0	0	0
HAV_6486	HAV_6486_S116_R1_001.fastq.gz	Y2019	NC340	Ames 27166	ts	LN	S	sp1	spb2	3115	3	1	15	rep3	132	81	98	61	90	83	61	81	97	0	0	0	84	55	125	0	0	0	0	0	0	0	0	0	0	0	0	0	0	0	0	0	0	0	0
HAV_6487	HAV_6487_S124_R1_001.fastq.gz	Y2019	NC346	Ames 27169	ts	LN	S	sp1	spb2	3117	3	1	17	rep1	16	10	12	0	5	18	10	17	13	7	15	10	7	5	8	0	0	0	0	0	0	0	0	0	0	0	0	0	0	6	0	0	0	0	0
HAV_6488	HAV_6488_S132_R1_001.fastq.gz	Y2019	NC346	Ames 27169	ts	LN	S	sp1	spb2	3117	3	1	17	rep2	17	3	7	5	5	3	2	10	12	26	17	12	2	4	7	0	0	0	0	0	0	0	0	0	0	0	0	0	0	0	0	0	0	0	0
HAV_6489	HAV_6489_S1_R1_001.fastq.gz	Y2019	NC346	Ames 27169	ts	LN	S	sp1	spb2	3117	3	1	17	rep3	49	20	29	21	31	23	26	20	39	71	49	42	31	31	30	0	0	0	0	0	0	0	0	0	0	0	0	0	0	0	0	0	36	0	0
HAV_6490	HAV_6490_S10_R1_001.fastq.gz	Y2019	NC318	Ames 27155	ts	LN	S	sp1	spb2	3119	3	1	19	rep1	45	20	28	19	28	27	20	24	27	7	7	8	18	18	22	0	0	33	0	11	11	10	14	0	20	11	0	16	17	9	0	0	0	0	0
HAV_6491	HAV_6491_S19_R1_001.fastq.gz	Y2019	NC318	Ames 27155	ts	LN	S	sp1	spb2	3119	3	1	19	rep2	49	19	22	24	25	26	17	15	21	17	20	8	22	24	27	0	0	14	0	11	0	0	13	0	10	11	12	10	10	16	47	0	0	0	0
HAV_6492	HAV_6492_S28_R1_001.fastq.gz	Y2019	NC318	Ames 27155	ts	LN	S	sp1	spb2	3119	3	1	19	rep3	80	43	53	39	62	53	40	36	67	137	103	86	35	40	62	0	0	0	0	0	0	0	0	0	0	0	0	0	0	0	0	0	0	0	0
HAV_6493	HAV_6493_S37_R1_001.fastq.gz	Y2019	GA209	Ames 10248	nss	LN	S	sp1	spb2	3121	3	1	21	rep1	49	35	33	30	34	53	31	35	38	87	54	79	24	30	58	7	0	0	0	11	11	0	0	0	15	18	0	14	0	13	0	0	0	0	0
HAV_6494	HAV_6494_S45_R1_001.fastq.gz	Y2019	GA209	Ames 10248	nss	LN	S	sp1	spb2	3121	3	1	21	rep2	71	23	30	24	34	25	28	27	30	52	53	46	29	26	28	0	0	18	0	0	0	0	0	0	10	7	0	0	0	0	0	0	0	0	0
HAV_6495	HAV_6495_S53_R1_001.fastq.gz	Y2019	GA209	Ames 10248	nss	LN	S	sp1	spb2	3121	3	1	21	rep3	89	42	57	32	51	51	50	41	55	29	32	24	37	53	65	8	0	23	0	14	15	0	10	0	18	21	16	14	0	20	54	0	0	0	0
HAV_6496	HAV_6496_S61_R1_001.fastq.gz	Y2019	M37W	Ames 27133	mixed	LN	S	sp1	spb2	3123	3	1	23	rep1	125	68	77	62	72	79	70	68	102	24	21	17	66	53	106	0	0	0	0	0	0	0	0	0	0	0	0	0	0	0	0	0	0	0	0
HAV_6497	HAV_6497_S2_R1_001.fastq.gz	Y2019	M37W	Ames 27133	mixed	LN	S	sp1	spb2	3123	3	1	23	rep2	43	17	30	20	27	22	24	21	30	0	0	0	25	31	40	0	0	0	0	0	0	0	0	0	0	0	0	0	0	0	0	0	0	0	0
HAV_6498	HAV_6498_S11_R1_001.fastq.gz	Y2019	M37W	Ames 27133	mixed	LN	S	sp1	spb2	3123	3	1	23	rep3	48	18	32	23	27	41	21	14	36	21	19	9	21	30	37	0	0	0	0	0	0	0	0	0	0	0	0	0	0	0	0	0	0	0	0
HAV_6499	HAV_6499_S20_R1_001.fastq.gz	Y2019	NC338	Ames 27165	ts	LN	S	sp1	spb2	3126	3	1	26	rep1	148	88	92	76	108	83	87	87	115	51	46	46	70	76	104	16	0	21	16	21	13	0	13	0	19	21	10	14	21	16	0	0	0	0	0
HAV_6500	HAV_6500_S29_R1_001.fastq.gz	Y2019	NC338	Ames 27165	ts	LN	S	sp1	spb2	3126	3	1	26	rep2	17	14	20	15	22	11	16	21	37	29	15	23	21	11	19	20	16	18	18	34	26	13	19	0	17	24	15	16	15	30	0	0	0	0	0
HAV_6501	HAV_6501_S38_R1_001.fastq.gz	Y2019	NC338	Ames 27165	ts	LN	S	sp1	spb2	3126	3	1	26	rep3	27	25	16	15	16	22	16	23	13	37	24	18	17	7	17	0	0	0	0	0	0	0	0	0	0	0	0	0	0	15	0	0	0	0	0
HAV_6502	HAV_6502_S46_R1_001.fastq.gz	Y2019	K64	Ames 27121	nss	LN	S	sp1	spb2	3127	3	1	27	rep1	86	41	52	24	56	48	28	33	38	22	9	15	42	28	51	0	0	0	0	0	0	0	0	0	0	0	0	0	0	0	78	0	22	0	0
HAV_6503	HAV_6503_S54_R1_001.fastq.gz	Y2019	K64	Ames 27121	nss	LN	S	sp1	spb2	3127	3	1	27	rep2	43	17	26	16	22	23	21	27	28	49	31	40	14	12	40	0	0	0	0	0	0	0	0	0	0	0	0	0	0	0	38	23	23	0	0
HAV_6504	HAV_6504_S62_R1_001.fastq.gz	Y2019	K64	Ames 27121	nss	LN	S	sp1	spb2	3127	3	1	27	rep3	17	2	4	1	12	7	9	3	1	30	44	44	6	8	5	0	0	0	0	0	0	0	0	0	0	0	0	0	0	0	0	0	0	0	0
HAV_6505	HAV_6505_S3_R1_001.fastq.gz	Y2019	PA91	PI 587147	nss	LN	S	sp1	spb3	3129	3	1	29	rep1	73	39	50	30	51	45	35	42	56	24	26	19	45	33	53	0	0	0	0	0	0	0	0	0	0	0	0	0	0	0	0	0	0	0	0
HAV_6506	HAV_6506_S12_R1_001.fastq.gz	Y2019	PA91	PI 587147	nss	LN	S	sp1	spb3	3129	3	1	29	rep2	68	40	38	42	59	54	52	50	48	35	24	21	49	29	49	0	0	0	0	0	0	0	0	0	0	0	0	0	0	0	0	0	0	0	0
HAV_6507	HAV_6507_S21_R1_001.fastq.gz	Y2019	PA91	PI 587147	nss	LN	S	sp1	spb3	3129	3	1	29	rep3	52	15	19	22	32	26	24	19	34	30	35	28	17	16	29	0	0	0	0	0	0	0	0	0	0	0	0	0	0	0	29	13	26	0	18
HAV_6508	HAV_6508_S30_R1_001.fastq.gz	Y2019	T232	PI 550522	mixed	LN	S	sp1	spb3	3131	3	1	31	rep1	85	61	43	37	71	58	41	39	57	36	28	26	39	32	52	0	0	0	0	0	0	0	0	0	0	0	0	0	0	0	0	0	0	0	0
HAV_6509	HAV_6509_S39_R1_001.fastq.gz	Y2019	T232	PI 550522	mixed	LN	S	sp1	spb3	3131	3	1	31	rep2	118	52	61	40	68	67	58	61	80	51	57	35	61	50	81	12	5	15	15	27	0	5	11	0	17	18	8	13	7	14	0	0	0	0	0
HAV_6510	HAV_6510_S47_R1_001.fastq.gz	Y2019	T232	PI 550522	mixed	LN	S	sp1	spb3	3131	3	1	31	rep3	169	89	86	71	114	81	70	77	106	24	22	27	75	65	91	0	0	0	0	0	0	0	0	0	0	0	0	0	0	0	0	0	0	0	0
HAV_6511	HAV_6511_S55_R1_001.fastq.gz	Y2019	Check_B73xMo17			LN	S	sp1	spb3	3133	3	1	33	rep1	113	62	87	49	61	83	58	59	74	21	19	14	44	70	88	0	0	0	0	0	0	0	0	0	0	0	0	0	0	0	70	0	0	0	0
HAV_6512	HAV_6512_S63_R1_001.fastq.gz	Y2019	Check_B73xMo17			LN	S	sp1	spb3	3133	3	1	33	rep2	39	24	42	14	33	39	29	39	31	6	6	5	23	16	31	0	0	0	0	0	0	0	0	0	0	0	0	0	0	0	0	0	0	0	0
HAV_6513	HAV_6513_S4_R1_001.fastq.gz	Y2019	Check_B73xMo17			LN	S	sp1	spb3	3133	3	1	33	rep3	43	19	36	20	34	26	27	32	34	16	8	2	22	23	48	0	0	0	0	0	0	0	0	0	0	0	0	0	0	0	0	0	0	0	0
HAV_6514	HAV_6514_S13_R1_001.fastq.gz	Y2019	TZI25	PI 506255	mixed	LN	S	sp1	spb3	3135	3	1	35	rep1	187	96	115	92	132	136	117	114	137	42	35	27	102	98	133	18	10	29	18	13	19	22	15	0	25	37	25	39	27	29	0	0	0	0	0
HAV_6515	HAV_6515_S22_R1_001.fastq.gz	Y2019	TZI25	PI 506255	mixed	LN	S	sp1	spb3	3135	3	1	35	rep2	24	24	18	9	23	21	12	15	30	4	10	5	14	21	22	9	0	12	0	20	0	0	8	0	11	15	8	15	0	15	0	0	0	0	0
HAV_6516	HAV_6516_S31_R1_001.fastq.gz	Y2019	TZI25	PI 506255	mixed	LN	S	sp1	spb3	3135	3	1	35	rep3	52	27	39	37	60	54	34	44	49	22	15	20	42	29	42	0	0	0	0	0	0	0	0	0	7	0	0	0	0	0	0	0	0	0	0
HAV_6517	HAV_6517_S40_R1_001.fastq.gz	Y2019	DE2	PI 606330	nss	LN	S	sp1	spb3	3138	3	1	38	rep1	0	0	0	0	8	27	0	11	20	4	1	0	0	0	8	0	0	0	0	0	0	0	0	0	0	0	0	0	0	0	150	67	95	41	74
HAV_6518	HAV_6518_S48_R1_001.fastq.gz	Y2019	DE2	PI 606330	nss	LN	S	sp1	spb3	3138	3	1	38	rep2	36	17	9	18	31	20	23	17	22	10	13	15	19	15	24	0	0	0	0	0	0	0	0	0	0	0	0	0	0	0	0	0	0	0	0
HAV_6519	HAV_6519_S56_R1_001.fastq.gz	Y2019	DE2	PI 606330	nss	LN	S	sp1	spb3	3138	3	1	38	rep3	47	25	44	21	36	34	30	29	39	61	65	47	27	26	35	0	0	0	0	0	0	0	0	0	0	0	0	0	0	0	51	16	30	15	17
HAV_6520	HAV_6520_S64_R1_001.fastq.gz	Y2019	IL101	Ames 27119	sweet	LN	S	sp1	spb3	3140	3	1	40	rep1	34	17	22	16	20	16	17	17	26	24	11	18	17	20	18	0	0	12	12	0	0	0	0	0	0	11	0	0	0	0	39	0	25	0	0
HAV_6521	HAV_6521_S5_R1_001.fastq.gz	Y2019	IL101	Ames 27119	sweet	LN	S	sp1	spb3	3140	3	1	40	rep2	45	28	36	18	28	33	13	24	34	19	7	7	24	13	35	0	0	0	0	0	0	0	0	0	0	0	0	0	0	0	40	0	0	0	0
HAV_6522	HAV_6522_S14_R1_001.fastq.gz	Y2019	IL101	Ames 27119	sweet	LN	S	sp1	spb3	3140	3	1	40	rep3	20	13	6	8	15	11	10	13	10	29	31	19	3	8	6	0	0	0	0	0	0	0	0	0	0	0	0	0	0	0	77	33	52	23	44
HAV_6523	HAV_6523_S23_R1_001.fastq.gz	Y2019	KI2021	Ames 27129	ts	LN	S	sp1	spb3	3142	3	1	42	rep1	29	17	18	25	34	21	16	30	24	0	0	0	15	18	22	0	0	0	0	0	0	0	0	0	0	0	0	0	0	0	0	0	0	0	0
HAV_6524	HAV_6524_S32_R1_001.fastq.gz	Y2019	KI2021	Ames 27129	ts	LN	S	sp1	spb3	3142	3	1	42	rep2	58	16	30	0	18	24	16	42	26	0	0	0	18	14	25	0	0	0	0	0	0	0	0	0	0	0	0	0	0	0	0	0	0	0	0
HAV_6525	HAV_6525_S41_R1_001.fastq.gz	Y2019	KI2021	Ames 27129	ts	LN	S	sp1	spb3	3142	3	1	42	rep3	100	40	38	35	63	52	40	57	62	29	22	19	40	30	68	0	0	0	0	0	0	0	0	0	0	0	0	0	0	0	0	0	0	0	0
HAV_6526	HAV_6526_S49_R1_001.fastq.gz	Y2019	C49A	Ames 27067	nss	LN	S	sp2	spb1	3143	3	1	43	rep1	29	11	14	13	25	20	22	25	11	10	13	8	11	12	34	0	0	0	0	0	0	0	0	0	0	0	0	0	0	0	140	57	86	43	66
HAV_6527	HAV_6527_S57_R1_001.fastq.gz	Y2019	C49A	Ames 27067	nss	LN	S	sp2	spb1	3143	3	1	43	rep2	19	12	21	11	14	15	7	14	21	25	22	17	7	10	17	0	0	0	0	0	0	0	0	0	0	0	0	0	0	0	36	18	21	11	0
HAV_6528	HAV_6528_S65_R1_001.fastq.gz	Y2019	C49A	Ames 27067	nss	LN	S	sp2	spb1	3143	3	1	43	rep3	36	12	33	14	41	29	20	23	29	9	11	9	23	24	30	0	0	0	0	0	0	0	0	0	0	0	0	0	0	0	54	0	0	0	0
HAV_6529	HAV_6529_S6_R1_001.fastq.gz	Y2019	A661	PI 607521	nss	LN	S	sp2	spb1	3146	3	1	46	rep1	45	0	17	17	22	18	30	20	27	0	0	0	10	11	19	0	0	0	0	0	0	0	0	0	0	0	0	0	0	0	66	0	0	0	0
HAV_6530	HAV_6530_S15_R1_001.fastq.gz	Y2019	A661	PI 607521	nss	LN	S	sp2	spb1	3146	3	1	46	rep2	136	91	96	62	86	89	82	74	86	0	0	0	79	84	110	20	15	23	15	21	23	11	18	0	34	32	18	26	23	38	0	0	0	0	0
HAV_6531	HAV_6531_S24_R1_001.fastq.gz	Y2019	A661	PI 607521	nss	LN	S	sp2	spb1	3146	3	1	46	rep3	82	38	44	36	43	60	50	44	47	41	28	22	38	41	54	0	0	0	0	0	0	0	0	0	0	0	0	0	0	0	313	170	228	85	141
HAV_6532	HAV_6532_S33_R1_001.fastq.gz	Y2019	B75	PI 608774	nss	LN	S	sp2	spb1	3147	3	1	47	rep1	29	20	25	14	23	24	21	53	31	7	9	2	8	21	23	0	0	0	0	0	0	0	0	0	0	0	0	0	0	0	45	28	0	0	13
HAV_6533	HAV_6533_S42_R1_001.fastq.gz	Y2019	B75	PI 608774	nss	LN	S	sp2	spb1	3147	3	1	47	rep2	20	0	22	0	15	31	0	0	24	4	0	5	13	10	9	0	0	0	0	0	0	0	0	0	0	0	0	0	0	0	117	67	79	29	55
HAV_6534	HAV_6534_S50_R1_001.fastq.gz	Y2019	B75	PI 608774	nss	LN	S	sp2	spb1	3147	3	1	47	rep3	52	31	28	27	49	41	24	31	47	117	84	85	34	35	58	25	14	14	19	17	0	11	13	0	14	17	9	12	0	20	0	0	0	0	0
[truncated: 1,307 more rows]
[truncated: 3,591 more columns]
