# Supplementary material for: Maize root-associated microbes likely under adaptive selection by the host to enhance phenotypic performance
Source: bioRxiv preprint, doi:10.1101/2021.11.01.466815, version 1 (2021-11-02)
Supplement: Supplementary Dataset 4 [file 466815_file04.csv]

nitrogen_treatment	genotype	trait	value	unit	type
LN	33-16	CC_Aug12	54.559963945	canopy coverage (%)	plant trait
LN	33-16	ExG_Aug12	0.32916409999999996	excess green index	plant trait
LN	33-16	DW	5.820031258	leaf dry weight (g)	plant trait
LN	33-16	FW	24.16945405	leaf fresh weight (g)	plant trait
LN	33-16	LA	1143.823748	leaf area (m2)	plant trait
LN	33-16	B	14.87023016	micronutrient (%)	plant trait
LN	33-16	Ca	0.384060556	micronutrient (%)	plant trait
LN	33-16	Fe	78.20178198	micronutrient (%)	plant trait
LN	33-16	K	2.07505392	micronutrient (%)	plant trait
LN	33-16	Mg	0.187619722	micronutrient (%)	plant trait
LN	33-16	N	2.105841664	micronutrient (%)	plant trait
LN	33-16	P	0.306039039	micronutrient (%)	plant trait
LN	33-16	S	0.159274731	micronutrient (%)	plant trait
HN	33-16	CC_Aug12	38.62171333	canopy coverage (%)	plant trait
HN	33-16	ExG_Aug12	0.33789480000000005	excess green index	plant trait
HN	33-16	CHL	460.9107867	chlorophyll content (µmol/m2)	plant trait
HN	33-16	DW	7.784881793	leaf dry weight (g)	plant trait
HN	33-16	FW	33.31777077	leaf fresh weight (g)	plant trait
HN	33-16	LA	1407.086704	leaf area (m2)	plant trait
HN	33-16	B	12.20076477	micronutrient (%)	plant trait
HN	33-16	Ca	0.492008958	micronutrient (%)	plant trait
HN	33-16	Cu	11.85098414	micronutrient (%)	plant trait
HN	33-16	Fe	102.7287434	micronutrient (%)	plant trait
HN	33-16	K	2.266686293	micronutrient (%)	plant trait
HN	33-16	Mg	0.209151701	micronutrient (%)	plant trait
HN	33-16	Mn	73.27937175	micronutrient (%)	plant trait
HN	33-16	N	2.91388319	micronutrient (%)	plant trait
HN	33-16	P	0.282391914	micronutrient (%)	plant trait
HN	33-16	S	0.179406767	micronutrient (%)	plant trait
HN	33-16	Zn	21.13639149	micronutrient (%)	plant trait
LN	38-11	CC_Aug12	62.992439355	canopy coverage (%)	plant trait
LN	38-11	ExG_Aug12	0.32094155	excess green index	plant trait
LN	38-11	CHL	303.6087224	chlorophyll content (µmol/m2)	plant trait
LN	38-11	DW	6.949112546	leaf dry weight (g)	plant trait
LN	38-11	FW	25.95161675	leaf fresh weight (g)	plant trait
LN	38-11	LA	1152.687105	leaf area (m2)	plant trait
LN	38-11	B	15.85330705	micronutrient (%)	plant trait
LN	38-11	Ca	0.405220479	micronutrient (%)	plant trait
LN	38-11	Cu	12.6388719	micronutrient (%)	plant trait
LN	38-11	Fe	94.21247931	micronutrient (%)	plant trait
LN	38-11	K	2.155876488	micronutrient (%)	plant trait
LN	38-11	Mg	0.12041846	micronutrient (%)	plant trait
LN	38-11	Mn	69.90114863	micronutrient (%)	plant trait
LN	38-11	N	2.200455945	micronutrient (%)	plant trait
LN	38-11	P	0.31665414	micronutrient (%)	plant trait
LN	38-11	S	0.229010838	micronutrient (%)	plant trait
LN	38-11	Zn	20.95237373	micronutrient (%)	plant trait
HN	38-11	CC_Aug12	65.4980243	canopy coverage (%)	plant trait
HN	38-11	ExG_Aug12	0.3712708	excess green index	plant trait
HN	38-11	CHL	424.6357207	chlorophyll content (µmol/m2)	plant trait
HN	38-11	DW	7.742103973	leaf dry weight (g)	plant trait
HN	38-11	FW	35.92131571	leaf fresh weight (g)	plant trait
HN	38-11	LA	1322.079497	leaf area (m2)	plant trait
HN	38-11	B	17.92034984	micronutrient (%)	plant trait
HN	38-11	Ca	0.459583834	micronutrient (%)	plant trait
HN	38-11	Cu	17.29868111	micronutrient (%)	plant trait
HN	38-11	Fe	111.5283466	micronutrient (%)	plant trait
HN	38-11	K	2.352326059	micronutrient (%)	plant trait
HN	38-11	Mg	0.169481138	micronutrient (%)	plant trait
HN	38-11	Mn	96.62675109	micronutrient (%)	plant trait
HN	38-11	N	2.945763887	micronutrient (%)	plant trait
HN	38-11	P	0.311173647	micronutrient (%)	plant trait
HN	38-11	S	0.207564284	micronutrient (%)	plant trait
HN	38-11	Zn	25.97082233	micronutrient (%)	plant trait
LN	4226	CC_Aug12	36.22947676	canopy coverage (%)	plant trait
LN	4226	ExG_Aug12	0.2740553	excess green index	plant trait
LN	4226	CHL	251.826695	chlorophyll content (µmol/m2)	plant trait
LN	4226	DW	5.601377437	leaf dry weight (g)	plant trait
LN	4226	FW	21.50847174	leaf fresh weight (g)	plant trait
LN	4226	LA	1057.893482	leaf area (m2)	plant trait
LN	4226	B	14.5704684	micronutrient (%)	plant trait
LN	4226	Ca	0.453034714	micronutrient (%)	plant trait
LN	4226	Cu	6.20644631	micronutrient (%)	plant trait
LN	4226	Fe	74.5528692	micronutrient (%)	plant trait
LN	4226	K	2.082046916	micronutrient (%)	plant trait
LN	4226	Mg	0.171443554	micronutrient (%)	plant trait
LN	4226	Mn	65.92262269	micronutrient (%)	plant trait
LN	4226	N	1.966010036	micronutrient (%)	plant trait
LN	4226	P	0.334945649	micronutrient (%)	plant trait
LN	4226	S	0.169011283	micronutrient (%)	plant trait
LN	4226	Zn	34.30092377	micronutrient (%)	plant trait
HN	4226	CC_Aug12	54.822391025	canopy coverage (%)	plant trait
HN	4226	ExG_Aug12	0.32163129999999995	excess green index	plant trait
HN	4226	CHL	398.0556694	chlorophyll content (µmol/m2)	plant trait
HN	4226	DW	6.846523012	leaf dry weight (g)	plant trait
HN	4226	FW	27.08512441	leaf fresh weight (g)	plant trait
HN	4226	LA	1238.201029	leaf area (m2)	plant trait
HN	4226	B	19.47632339	micronutrient (%)	plant trait
HN	4226	Ca	0.459656499	micronutrient (%)	plant trait
HN	4226	Cu	14.34039487	micronutrient (%)	plant trait
HN	4226	Fe	101.45738	micronutrient (%)	plant trait
HN	4226	K	2.28239648	micronutrient (%)	plant trait
HN	4226	Mg	0.205567693	micronutrient (%)	plant trait
HN	4226	Mn	90.75421484	micronutrient (%)	plant trait
HN	4226	N	3.081339858	micronutrient (%)	plant trait
HN	4226	P	0.349207713	micronutrient (%)	plant trait
HN	4226	S	0.211038349	micronutrient (%)	plant trait
HN	4226	Zn	51.6221653	micronutrient (%)	plant trait
LN	4722	CC_Aug12	41.458086755	canopy coverage (%)	plant trait
LN	4722	ExG_Aug12	0.32179585	excess green index	plant trait
LN	4722	LA	1097.415461	leaf area (m2)	plant trait
LN	4722	B	12.7718979	micronutrient (%)	plant trait
LN	4722	Ca	0.261439831	micronutrient (%)	plant trait
LN	4722	Cu	5.127553566	micronutrient (%)	plant trait
LN	4722	Fe	70.17417387	micronutrient (%)	plant trait
LN	4722	K	2.200927856	micronutrient (%)	plant trait
LN	4722	Mg	0.135047177	micronutrient (%)	plant trait
LN	4722	Mn	58.0105683	micronutrient (%)	plant trait
LN	4722	N	1.739948904	micronutrient (%)	plant trait
LN	4722	P	0.289176849	micronutrient (%)	plant trait
LN	4722	S	0.14953818	micronutrient (%)	plant trait
LN	4722	Zn	25.22484174	micronutrient (%)	plant trait
HN	4722	CC_Aug12	54.79535394	canopy coverage (%)	plant trait
HN	4722	ExG_Aug12	0.3546203	excess green index	plant trait
HN	4722	CHL	377.9778081	chlorophyll content (µmol/m2)	plant trait
HN	4722	DW	6.043258685	leaf dry weight (g)	plant trait
HN	4722	FW	25.5450576	leaf fresh weight (g)	plant trait
HN	4722	LA	1080.790517	leaf area (m2)	plant trait
HN	4722	Ca	0.333481907	micronutrient (%)	plant trait
HN	4722	Cu	10.78409383	micronutrient (%)	plant trait
HN	4722	Fe	99.55033493	micronutrient (%)	plant trait
HN	4722	K	2.496055021	micronutrient (%)	plant trait
HN	4722	Mg	0.198399678	micronutrient (%)	plant trait
HN	4722	Mn	71.75982017	micronutrient (%)	plant trait
HN	4722	N	2.906440671	micronutrient (%)	plant trait
HN	4722	P	0.324151788	micronutrient (%)	plant trait
HN	4722	S	0.195222558	micronutrient (%)	plant trait
LN	796	CHL	326.8824311	chlorophyll content (µmol/m2)	plant trait
LN	796	DW	5.803713808	leaf dry weight (g)	plant trait
LN	796	FW	22.72182373	leaf fresh weight (g)	plant trait
LN	796	LA	1075.905673	leaf area (m2)	plant trait
LN	796	B	13.3714214	micronutrient (%)	plant trait
LN	796	Ca	0.399388147	micronutrient (%)	plant trait
LN	796	Cu	9.443124542	micronutrient (%)	plant trait
LN	796	Fe	78.44504283	micronutrient (%)	plant trait
LN	796	K	2.326801793	micronutrient (%)	plant trait
LN	796	Mg	0.195707806	micronutrient (%)	plant trait
LN	796	Mn	62.59123137	micronutrient (%)	plant trait
LN	796	N	2.208384858	micronutrient (%)	plant trait
LN	796	P	0.284359081	micronutrient (%)	plant trait
LN	796	S	0.181993351	micronutrient (%)	plant trait
LN	796	Zn	24.84667166	micronutrient (%)	plant trait
HN	796	CHL	419.7681339	chlorophyll content (µmol/m2)	plant trait
HN	796	DW	6.499658871	leaf dry weight (g)	plant trait
HN	796	FW	26.27689091	leaf fresh weight (g)	plant trait
HN	796	LA	1172.608286	leaf area (m2)	plant trait
HN	796	B	10.74565304	micronutrient (%)	plant trait
HN	796	Ca	0.39495158	micronutrient (%)	plant trait
HN	796	Cu	14.34039487	micronutrient (%)	plant trait
HN	796	Fe	107.602303	micronutrient (%)	plant trait
HN	796	K	2.247834069	micronutrient (%)	plant trait
HN	796	Mg	0.298751887	micronutrient (%)	plant trait
HN	796	Mn	75.938587	micronutrient (%)	plant trait
HN	796	N	2.917604449	micronutrient (%)	plant trait
HN	796	P	0.290743889	micronutrient (%)	plant trait
HN	796	S	0.200494489	micronutrient (%)	plant trait
HN	796	Zn	27.95557774	micronutrient (%)	plant trait
LN	A188	CC_Aug12	39.9436858	canopy coverage (%)	plant trait
LN	A188	ExG_Aug12	0.33305525	excess green index	plant trait
LN	A188	CHL	370.2958809	chlorophyll content (µmol/m2)	plant trait
LN	A188	B	13.9709449	micronutrient (%)	plant trait
LN	A188	Ca	0.334245887	micronutrient (%)	plant trait
LN	A188	Cu	10.8816482	micronutrient (%)	plant trait
LN	A188	Fe	97.66265013	micronutrient (%)	plant trait
LN	A188	K	2.068060924	micronutrient (%)	plant trait
LN	A188	Mg	0.143135261	micronutrient (%)	plant trait
LN	A188	N	2.411140719	micronutrient (%)	plant trait
LN	A188	P	0.339763417	micronutrient (%)	plant trait
LN	A188	S	0.230676109	micronutrient (%)	plant trait
LN	A188	Zn	22.95582123	micronutrient (%)	plant trait
HN	A188	CC_Aug12	34.20716799	canopy coverage (%)	plant trait
HN	A188	ExG_Aug12	0.33246526892922645	excess green index	plant trait
HN	A188	CHL	458.104204	chlorophyll content (µmol/m2)	plant trait
HN	A188	DW	5.302064784	leaf dry weight (g)	plant trait
HN	A188	FW	21.07363647	leaf fresh weight (g)	plant trait
HN	A188	LA	904.9172558	leaf area (m2)	plant trait
HN	A188	B	16.92987787	micronutrient (%)	plant trait
HN	A188	Ca	0.346422891	micronutrient (%)	plant trait
HN	A188	Cu	14.69602497	micronutrient (%)	plant trait
HN	A188	Fe	105.4833641	micronutrient (%)	plant trait
HN	A188	K	2.100158313	micronutrient (%)	plant trait
HN	A188	Mg	0.180479641	micronutrient (%)	plant trait
HN	A188	N	3.01807845	micronutrient (%)	plant trait
HN	A188	P	0.351991705	micronutrient (%)	plant trait
HN	A188	S	0.197858523	micronutrient (%)	plant trait
HN	A188	Zn	25.94993472	micronutrient (%)	plant trait
LN	A214N	CC_Aug12	69.19141353	canopy coverage (%)	plant trait
LN	A214N	ExG_Aug12	0.36387805	excess green index	plant trait
LN	A214N	CHL	272.571914	chlorophyll content (µmol/m2)	plant trait
LN	A214N	DW	6.143116754	leaf dry weight (g)	plant trait
LN	A214N	FW	26.48076721	leaf fresh weight (g)	plant trait
LN	A214N	LA	1086.471392	leaf area (m2)	plant trait
LN	A214N	B	16.06927716	micronutrient (%)	plant trait
LN	A214N	Ca	0.288263115	micronutrient (%)	plant trait
LN	A214N	Cu	6.20644631	micronutrient (%)	plant trait
LN	A214N	Fe	70.41743472	micronutrient (%)	plant trait
LN	A214N	K	2.484144213	micronutrient (%)	plant trait
LN	A214N	Mg	0.175487596	micronutrient (%)	plant trait
LN	A214N	Mn	53.01348133	micronutrient (%)	plant trait
LN	A214N	N	1.966010036	micronutrient (%)	plant trait
LN	A214N	P	0.303630154	micronutrient (%)	plant trait
LN	A214N	S	0.159274731	micronutrient (%)	plant trait
LN	A214N	Zn	25.98118191	micronutrient (%)	plant trait
HN	A214N	CC_Aug12	67.23943288500001	canopy coverage (%)	plant trait
HN	A214N	ExG_Aug12	0.39998625	excess green index	plant trait
HN	A214N	CHL	382.7274097	chlorophyll content (µmol/m2)	plant trait
HN	A214N	DW	5.366936122	leaf dry weight (g)	plant trait
HN	A214N	LA	1121.813688	leaf area (m2)	plant trait
HN	A214N	B	18.74876753	micronutrient (%)	plant trait
HN	A214N	Ca	0.359363874	micronutrient (%)	plant trait
HN	A214N	Cu	10.78409383	micronutrient (%)	plant trait
HN	A214N	Fe	96.79571427	micronutrient (%)	plant trait
HN	A214N	K	2.411220012	micronutrient (%)	plant trait
HN	A214N	Mg	0.216319716	micronutrient (%)	plant trait
HN	A214N	Mn	62.26262284	micronutrient (%)	plant trait
HN	A214N	N	2.876670597	micronutrient (%)	plant trait
HN	A214N	P	0.304663847	micronutrient (%)	plant trait
HN	A214N	S	0.182042732	micronutrient (%)	plant trait
HN	A214N	Zn	35.57702119	micronutrient (%)	plant trait
LN	A239	CC_Aug12	68.30955721500001	canopy coverage (%)	plant trait
LN	A239	ExG_Aug12	0.3438079	excess green index	plant trait
LN	A239	CHL	272.5136409	chlorophyll content (µmol/m2)	plant trait
LN	A239	DW	5.372933146	leaf dry weight (g)	plant trait
LN	A239	FW	19.64473511	leaf fresh weight (g)	plant trait
LN	A239	LA	964.5999464	leaf area (m2)	plant trait
LN	A239	B	12.1723744	micronutrient (%)	plant trait
LN	A239	Ca	0.368732966	micronutrient (%)	plant trait
LN	A239	Cu	5.487184481	micronutrient (%)	plant trait
LN	A239	Fe	73.33656494	micronutrient (%)	plant trait
LN	A239	K	1.854774531	micronutrient (%)	plant trait
LN	A239	Mg	0.167399512	micronutrient (%)	plant trait
LN	A239	Mn	64.25692703	micronutrient (%)	plant trait
LN	A239	N	1.840161571	micronutrient (%)	plant trait
LN	A239	P	0.265088008	micronutrient (%)	plant trait
LN	A239	S	0.136556111	micronutrient (%)	plant trait
LN	A239	Zn	16.52692979	micronutrient (%)	plant trait
HN	A239	CC_Aug12	74.22858189	canopy coverage (%)	plant trait
HN	A239	ExG_Aug12	0.37043507355213345	excess green index	plant trait
HN	A239	CHL	395.0023541	chlorophyll content (µmol/m2)	plant trait
HN	A239	DW	6.857476616	leaf dry weight (g)	plant trait
HN	A239	FW	27.40278832	leaf fresh weight (g)	plant trait
HN	A239	LA	1085.774073	leaf area (m2)	plant trait
HN	A239	Ca	0.479067974	micronutrient (%)	plant trait
HN	A239	Cu	10.42846372	micronutrient (%)	plant trait
HN	A239	Fe	103.7882129	micronutrient (%)	plant trait
HN	A239	K	2.012181267	micronutrient (%)	plant trait
HN	A239	Mg	0.209151701	micronutrient (%)	plant trait
HN	A239	Mn	92.6536543	micronutrient (%)	plant trait
HN	A239	N	2.692468262	micronutrient (%)	plant trait
HN	A239	P	0.29352788	micronutrient (%)	plant trait
HN	A239	S	0.179406767	micronutrient (%)	plant trait
LN	A554	CC_Aug12	57.22689674	canopy coverage (%)	plant trait
LN	A554	ExG_Aug12	0.2981164	excess green index	plant trait
LN	A554	CHL	296.9592009	chlorophyll content (µmol/m2)	plant trait
LN	A554	DW	4.997631812	leaf dry weight (g)	plant trait
LN	A554	FW	20.24616607	leaf fresh weight (g)	plant trait
LN	A554	LA	897.2903129	leaf area (m2)	plant trait
LN	A554	B	16.06927716	micronutrient (%)	plant trait
LN	A554	Ca	0.453034714	micronutrient (%)	plant trait
LN	A554	Cu	8.364231798	micronutrient (%)	plant trait
LN	A554	Fe	79.90460794	micronutrient (%)	plant trait
LN	A554	K	2.218410348	micronutrient (%)	plant trait
LN	A554	Mg	0.171443554	micronutrient (%)	plant trait
LN	A554	Mn	82.99600319	micronutrient (%)	plant trait
LN	A554	N	2.136138517	micronutrient (%)	plant trait
LN	A554	P	0.325310112	micronutrient (%)	plant trait
LN	A554	S	0.169011283	micronutrient (%)	plant trait
LN	A554	Zn	29.00654259	micronutrient (%)	plant trait
HN	A554	CC_Aug12	50.87843651	canopy coverage (%)	plant trait
HN	A554	ExG_Aug12	0.3109555243293455	excess green index	plant trait
HN	A554	CHL	352.2559397	chlorophyll content (µmol/m2)	plant trait
HN	A554	DW	5.093946299	leaf dry weight (g)	plant trait
HN	A554	FW	19.7306017	leaf fresh weight (g)	plant trait
HN	A554	LA	935.6302262	leaf area (m2)	plant trait
HN	A554	B	23.84165856	micronutrient (%)	plant trait
HN	A554	Ca	0.495244204	micronutrient (%)	plant trait
HN	A554	Fe	98.06707765	micronutrient (%)	plant trait
HN	A554	K	2.445782423	micronutrient (%)	plant trait
HN	A554	Mg	0.23782376	micronutrient (%)	plant trait
HN	A554	N	2.75572967	micronutrient (%)	plant trait
HN	A554	P	0.340855738	micronutrient (%)	plant trait
LN	A556	CC_Aug12	17.8229955	canopy coverage (%)	plant trait
LN	A556	ExG_Aug12	0.33323095	excess green index	plant trait
LN	A556	CHL	301.0091804	chlorophyll content (µmol/m2)	plant trait
LN	A556	DW	4.831193829	leaf dry weight (g)	plant trait
LN	A556	FW	18.46285335	leaf fresh weight (g)	plant trait
LN	A556	LA	874.0839434	leaf area (m2)	plant trait
LN	A556	B	12.1723744	micronutrient (%)	plant trait
LN	A556	Ca	0.318918296	micronutrient (%)	plant trait
LN	A556	K	2.183445365	micronutrient (%)	plant trait
LN	A556	Mg	0.151223345	micronutrient (%)	plant trait
LN	A556	P	0.30122127	micronutrient (%)	plant trait
HN	A556	CC_Aug12	23.70820937	canopy coverage (%)	plant trait
HN	A556	ExG_Aug12	0.3411409921542875	excess green index	plant trait
HN	A556	CHL	420.3541237	chlorophyll content (µmol/m2)	plant trait
HN	A556	DW	5.846093805	leaf dry weight (g)	plant trait
HN	A556	FW	21.19024727	leaf fresh weight (g)	plant trait
HN	A556	LA	1009.315898	leaf area (m2)	plant trait
HN	A556	B	29.66210546	micronutrient (%)	plant trait
HN	A556	Ca	0.398186826	micronutrient (%)	plant trait
HN	A556	Cu	9.717203514	micronutrient (%)	plant trait
HN	A556	Fe	113.95912	micronutrient (%)	plant trait
HN	A556	K	2.35466334	micronutrient (%)	plant trait
HN	A556	Mg	0.158975596	micronutrient (%)	plant trait
HN	A556	Mn	101.3910758	micronutrient (%)	plant trait
HN	A556	N	2.897137523	micronutrient (%)	plant trait
HN	A556	P	0.29352788	micronutrient (%)	plant trait
HN	A556	S	0.192586593	micronutrient (%)	plant trait
HN	A556	Zn	33.17024957	micronutrient (%)	plant trait
LN	A619	CC_Aug12	15.75505622	canopy coverage (%)	plant trait
LN	A619	ExG_Aug12	0.28712715	excess green index	plant trait
LN	A619	CHL	315.140404	chlorophyll content (µmol/m2)	plant trait
LN	A619	DW	6.126799305	leaf dry weight (g)	plant trait
LN	A619	FW	25.10656741	leaf fresh weight (g)	plant trait
LN	A619	LA	1008.056078	leaf area (m2)	plant trait
LN	A619	B	19.06689467	micronutrient (%)	plant trait
LN	A619	Ca	0.318918296	micronutrient (%)	plant trait
LN	A619	Cu	8.723862713	micronutrient (%)	plant trait
LN	A619	Fe	94.01373735	micronutrient (%)	plant trait
LN	A619	K	2.445682733	micronutrient (%)	plant trait
LN	A619	Mg	0.110782926	micronutrient (%)	plant trait
LN	A619	Mn	55.51202482	micronutrient (%)	plant trait
LN	A619	N	2.241012238	micronutrient (%)	plant trait
LN	A619	P	0.30122127	micronutrient (%)	plant trait
LN	A619	S	0.165765765	micronutrient (%)	plant trait
LN	A619	Zn	24.84667166	micronutrient (%)	plant trait
HN	A619	CC_Aug12	10.2145199145	canopy coverage (%)	plant trait
HN	A619	ExG_Aug12	0.2964294757865395	excess green index	plant trait
HN	A619	CHL	376.4357297	chlorophyll content (µmol/m2)	plant trait
HN	A619	DW	6.003095469	leaf dry weight (g)	plant trait
HN	A619	FW	24.67650817	leaf fresh weight (g)	plant trait
HN	A619	LA	1020.925298	leaf area (m2)	plant trait
HN	A619	B	25.66054821	micronutrient (%)	plant trait
HN	A619	Ca	0.346422891	micronutrient (%)	plant trait
HN	A619	Cu	10.07283362	micronutrient (%)	plant trait
HN	A619	Fe	103.3644251	micronutrient (%)	plant trait
HN	A619	K	2.376657601	micronutrient (%)	plant trait
HN	A619	Mg	0.144639566	micronutrient (%)	plant trait
HN	A619	Mn	58.46374391	micronutrient (%)	plant trait
HN	A619	N	2.752008411	micronutrient (%)	plant trait
HN	A619	P	0.274039939	micronutrient (%)	plant trait
HN	A619	S	0.179406767	micronutrient (%)	plant trait
LN	A632	CC_Aug12	24.798831370000002	canopy coverage (%)	plant trait
LN	A632	ExG_Aug12	0.30041545000000003	excess green index	plant trait
LN	A632	CHL	303.8645617	chlorophyll content (µmol/m2)	plant trait
LN	A632	DW	5.203231673	leaf dry weight (g)	plant trait
LN	A632	FW	19.96643074	leaf fresh weight (g)	plant trait
LN	A632	LA	911.3488339	leaf area (m2)	plant trait
LN	A632	B	16.66880066	micronutrient (%)	plant trait
LN	A632	Ca	0.261439831	micronutrient (%)	plant trait
LN	A632	Cu	6.20644631	micronutrient (%)	plant trait
LN	A632	Fe	70.66069557	micronutrient (%)	plant trait
LN	A632	K	2.050578432	micronutrient (%)	plant trait
LN	A632	Mg	0.159311429	micronutrient (%)	plant trait
LN	A632	Mn	43.8521552	micronutrient (%)	plant trait
LN	A632	N	2.105841664	micronutrient (%)	plant trait
LN	A632	P	0.334945649	micronutrient (%)	plant trait
LN	A632	S	0.169011283	micronutrient (%)	plant trait
LN	A632	Zn	24.09033149	micronutrient (%)	plant trait
HN	A632	CC_Aug12	32.51152555	canopy coverage (%)	plant trait
HN	A632	ExG_Aug12	0.32848165	excess green index	plant trait
HN	A632	CHL	365.2402402	chlorophyll content (µmol/m2)	plant trait
HN	A632	DW	5.765767372	leaf dry weight (g)	plant trait
HN	A632	FW	23.93261167	leaf fresh weight (g)	plant trait
HN	A632	LA	1053.676314	leaf area (m2)	plant trait
HN	A632	B	19.84010132	micronutrient (%)	plant trait
HN	A632	Ca	0.310835185	micronutrient (%)	plant trait
HN	A632	Cu	9.005943306	micronutrient (%)	plant trait
HN	A632	Fe	96.16003257	micronutrient (%)	plant trait
HN	A632	K	2.433214274	micronutrient (%)	plant trait
HN	A632	Mg	0.194815671	micronutrient (%)	plant trait
HN	A632	Mn	62.64251073	micronutrient (%)	plant trait
HN	A632	N	2.824572967	micronutrient (%)	plant trait
HN	A632	P	0.338071747	micronutrient (%)	plant trait
HN	A632	S	0.168862907	micronutrient (%)	plant trait
HN	A632	Zn	28.35670634	micronutrient (%)	plant trait
LN	A634	CC_Aug12	57.24497179	canopy coverage (%)	plant trait
LN	A634	ExG_Aug12	0.34201605	excess green index	plant trait
LN	A634	CHL	267.2399265	chlorophyll content (µmol/m2)	plant trait
LN	A634	DW	4.377568738	leaf dry weight (g)	plant trait
LN	A634	FW	16.44176559	leaf fresh weight (g)	plant trait
LN	A634	LA	804.8757128	leaf area (m2)	plant trait
LN	A634	B	14.87023016	micronutrient (%)	plant trait
LN	A634	Ca	0.326582092	micronutrient (%)	plant trait
LN	A634	Cu	6.20644631	micronutrient (%)	plant trait
LN	A634	Fe	69.44439131	micronutrient (%)	plant trait
LN	A634	K	2.001627457	micronutrient (%)	plant trait
LN	A634	Mg	0.195707806	micronutrient (%)	plant trait
LN	A634	Mn	53.01348133	micronutrient (%)	plant trait
LN	A634	N	1.935713183	micronutrient (%)	plant trait
LN	A634	P	0.31808346	micronutrient (%)	plant trait
LN	A634	S	0.165765765	micronutrient (%)	plant trait
HN	A634	CC_Aug12	49.686271145000006	canopy coverage (%)	plant trait
HN	A634	ExG_Aug12	0.34802910414065447	excess green index	plant trait
HN	A634	CHL	436.5767889	chlorophyll content (µmol/m2)	plant trait
HN	A634	DW	5.506532067	leaf dry weight (g)	plant trait
HN	A634	FW	19.9115495	leaf fresh weight (g)	plant trait
HN	A634	LA	949.358506	leaf area (m2)	plant trait
HN	A634	B	19.11254546	micronutrient (%)	plant trait
HN	A634	Ca	0.430539285	micronutrient (%)	plant trait
HN	A634	Cu	12.56224435	micronutrient (%)	plant trait
HN	A634	Fe	95.94813868	micronutrient (%)	plant trait
HN	A634	K	1.974476819	micronutrient (%)	plant trait
HN	A634	Mg	0.255743798	micronutrient (%)	plant trait
HN	A634	Mn	66.44138967	micronutrient (%)	plant trait
HN	A634	N	2.850621782	micronutrient (%)	plant trait
HN	A634	P	0.315799814	micronutrient (%)	plant trait
HN	A634	S	0.187314663	micronutrient (%)	plant trait
HN	A634	Zn	36.37927839	micronutrient (%)	plant trait
LN	A635	CC_Aug12	52.95200622	canopy coverage (%)	plant trait
LN	A635	ExG_Aug12	0.3139401	excess green index	plant trait
LN	A635	CHL	242.8526396	chlorophyll content (µmol/m2)	plant trait
LN	A635	DW	4.459155985	leaf dry weight (g)	plant trait
LN	A635	FW	16.41029537	leaf fresh weight (g)	plant trait
LN	A635	LA	807.6936486	leaf area (m2)	plant trait
LN	A635	B	13.67118315	micronutrient (%)	plant trait
LN	A635	Ca	0.269103627	micronutrient (%)	plant trait
LN	A635	Cu	4.048660822	micronutrient (%)	plant trait
LN	A635	Fe	62.87634831	micronutrient (%)	plant trait
LN	A635	K	1.886243015	micronutrient (%)	plant trait
LN	A635	Mg	0.143135261	micronutrient (%)	plant trait
LN	A635	Mn	39.68791605	micronutrient (%)	plant trait
LN	A635	N	1.75160154	micronutrient (%)	plant trait
LN	A635	P	0.250634702	micronutrient (%)	plant trait
LN	A635	S	0.133310594	micronutrient (%)	plant trait
LN	A635	Zn	17.66144005	micronutrient (%)	plant trait
HN	A635	CC_Aug12	53.41975451	canopy coverage (%)	plant trait
HN	A635	ExG_Aug12	0.359152136229567	excess green index	plant trait
HN	A635	CHL	337.0510463	chlorophyll content (µmol/m2)	plant trait
HN	A635	FW	13.99254599	leaf fresh weight (g)	plant trait
HN	A635	LA	758.8425511	leaf area (m2)	plant trait
HN	A635	B	16.20232201	micronutrient (%)	plant trait
HN	A635	Ca	0.336717153	micronutrient (%)	plant trait
HN	A635	Cu	8.294683097	micronutrient (%)	plant trait
HN	A635	Fe	92.55783632	micronutrient (%)	plant trait
HN	A635	K	2.210129621	micronutrient (%)	plant trait
HN	A635	Mg	0.201983686	micronutrient (%)	plant trait
HN	A635	Mn	56.18441655	micronutrient (%)	plant trait
HN	A635	N	2.70363204	micronutrient (%)	plant trait
HN	A635	P	0.29352788	micronutrient (%)	plant trait
HN	A635	S	0.184678698	micronutrient (%)	plant trait
LN	A641	CC_Aug12	17.44282785	canopy coverage (%)	plant trait
LN	A641	ExG_Aug12	0.30524375000000004	excess green index	plant trait
LN	A641	CHL	299.5793095	chlorophyll content (µmol/m2)	plant trait
LN	A641	DW	4.541405248	leaf dry weight (g)	plant trait
LN	A641	FW	16.99388651	leaf fresh weight (g)	plant trait
LN	A641	LA	804.9750205	leaf area (m2)	plant trait
LN	A641	B	19.27799003	micronutrient (%)	plant trait
LN	A641	Ca	0.399008037	micronutrient (%)	plant trait
LN	A641	Cu	7.584477009	micronutrient (%)	plant trait
LN	A641	Fe	79.74680991	micronutrient (%)	plant trait
LN	A641	K	1.806414932	micronutrient (%)	plant trait
LN	A641	Mg	0.201897379	micronutrient (%)	plant trait
LN	A641	Mn	61.33827721	micronutrient (%)	plant trait
LN	A641	N	2.091062538	micronutrient (%)	plant trait
LN	A641	P	0.323000728	micronutrient (%)	plant trait
LN	A641	S	0.209790908	micronutrient (%)	plant trait
LN	A641	Zn	44.6704885	micronutrient (%)	plant trait
HN	A641	CC_Aug12	17.454042287	canopy coverage (%)	plant trait
HN	A641	ExG_Aug12	0.341175830933584	excess green index	plant trait
HN	A641	CHL	354.3977611	chlorophyll content (µmol/m2)	plant trait
HN	A641	DW	5.171401722	leaf dry weight (g)	plant trait
HN	A641	FW	19.9081888	leaf fresh weight (g)	plant trait
HN	A641	LA	937.8688466	leaf area (m2)	plant trait
HN	A641	B	25.92524512	micronutrient (%)	plant trait
HN	A641	Ca	0.454801331	micronutrient (%)	plant trait
HN	A641	Cu	8.468222541	micronutrient (%)	plant trait
HN	A641	Fe	98.08511244	micronutrient (%)	plant trait
HN	A641	K	2.237786307	micronutrient (%)	plant trait
HN	A641	Mg	0.242099828	micronutrient (%)	plant trait
HN	A641	Mn	77.63579032	micronutrient (%)	plant trait
HN	A641	N	2.765172839	micronutrient (%)	plant trait
HN	A641	P	0.334322109	micronutrient (%)	plant trait
HN	A641	S	0.193246236	micronutrient (%)	plant trait
HN	A641	Zn	46.73485738	micronutrient (%)	plant trait
LN	A654	CC_Aug12	52.864140185	canopy coverage (%)	plant trait
LN	A654	ExG_Aug12	0.30493885	excess green index	plant trait
LN	A654	CHL	271.4938619	chlorophyll content (µmol/m2)	plant trait
LN	A654	DW	6.045212058	leaf dry weight (g)	plant trait
LN	A654	FW	23.76383783	leaf fresh weight (g)	plant trait
LN	A654	LA	1089.89366	leaf area (m2)	plant trait
LN	A654	B	16.06927716	micronutrient (%)	plant trait
LN	A654	Ca	0.437707124	micronutrient (%)	plant trait
LN	A654	Cu	11.24127912	micronutrient (%)	plant trait
LN	A654	Fe	80.14786879	micronutrient (%)	plant trait
LN	A654	K	2.144983885	micronutrient (%)	plant trait
LN	A654	Mg	0.175487596	micronutrient (%)	plant trait
LN	A654	Mn	55.51202482	micronutrient (%)	plant trait
LN	A654	N	2.01961216	micronutrient (%)	plant trait
LN	A654	P	0.303630154	micronutrient (%)	plant trait
LN	A654	S	0.162520248	micronutrient (%)	plant trait
LN	A654	Zn	35.05726394	micronutrient (%)	plant trait
HN	A654	CC_Aug12	54.08692924	canopy coverage (%)	plant trait
HN	A654	ExG_Aug12	0.31348437099162996	excess green index	plant trait
HN	A654	CHL	294.2121071	chlorophyll content (µmol/m2)	plant trait
HN	A654	DW	4.860269404	leaf dry weight (g)	plant trait
HN	A654	FW	19.55769603	leaf fresh weight (g)	plant trait
HN	A654	LA	955.9433838	leaf area (m2)	plant trait
HN	A654	B	21.65899097	micronutrient (%)	plant trait
HN	A654	Ca	0.41112781	micronutrient (%)	plant trait
HN	A654	Cu	18.25232602	micronutrient (%)	plant trait
HN	A654	Fe	105.0595763	micronutrient (%)	plant trait
HN	A654	K	2.417504087	micronutrient (%)	plant trait
HN	A654	Mg	0.234239753	micronutrient (%)	plant trait
HN	A654	Mn	68.34082913	micronutrient (%)	plant trait
HN	A654	N	2.718517077	micronutrient (%)	plant trait
HN	A654	P	0.349207713	micronutrient (%)	plant trait
HN	A654	S	0.184678698	micronutrient (%)	plant trait
HN	A654	Zn	46.80862206	micronutrient (%)	plant trait
LN	A659	CC_Aug12	36.743988465	canopy coverage (%)	plant trait
LN	A659	ExG_Aug12	0.30640795	excess green index	plant trait
LN	A659	CHL	341.567249	chlorophyll content (µmol/m2)	plant trait
LN	A659	B	15.46975366	micronutrient (%)	plant trait
LN	A659	Ca	0.311254501	micronutrient (%)	plant trait
LN	A659	Cu	7.285339054	micronutrient (%)	plant trait
LN	A659	Fe	80.6343905	micronutrient (%)	plant trait
LN	A659	K	1.910718503	micronutrient (%)	plant trait
LN	A659	Mg	0.114826968	micronutrient (%)	plant trait
LN	A659	N	2.180418532	micronutrient (%)	plant trait
LN	A659	P	0.298812386	micronutrient (%)	plant trait
LN	A659	S	0.1722568	micronutrient (%)	plant trait
LN	A659	Zn	21.82131098	micronutrient (%)	plant trait
HN	A659	CC_Aug12	42.595483575	canopy coverage (%)	plant trait
HN	A659	ExG_Aug12	0.3315253956478025	excess green index	plant trait
HN	A659	CHL	363.7598449	chlorophyll content (µmol/m2)	plant trait
HN	A659	DW	6.901291034	leaf dry weight (g)	plant trait
HN	A659	FW	30.80460692	leaf fresh weight (g)	plant trait
HN	A659	LA	1336.341056	leaf area (m2)	plant trait
HN	A659	B	16.56609994	micronutrient (%)	plant trait
HN	A659	Ca	0.343187645	micronutrient (%)	plant trait
HN	A659	Cu	10.07283362	micronutrient (%)	plant trait
HN	A659	Fe	100.6098044	micronutrient (%)	plant trait
HN	A659	K	2.379799638	micronutrient (%)	plant trait
HN	A659	Mg	0.176895633	micronutrient (%)	plant trait
HN	A659	Mn	77.83802647	micronutrient (%)	plant trait
HN	A659	N	2.897137523	micronutrient (%)	plant trait
HN	A659	P	0.301879855	micronutrient (%)	plant trait
HN	A659	S	0.176770802	micronutrient (%)	plant trait
HN	A659	Zn	23.14203451	micronutrient (%)	plant trait
LN	A661	CC_Aug12	43.794299429999995	canopy coverage (%)	plant trait
LN	A661	ExG_Aug12	0.3079531	excess green index	plant trait
LN	A661	CHL	298.5617108	chlorophyll content (µmol/m2)	plant trait
LN	A661	DW	4.025111833	leaf dry weight (g)	plant trait
LN	A661	FW	15.73543389	leaf fresh weight (g)	plant trait
LN	A661	LA	780.9540739	leaf area (m2)	plant trait
LN	A661	B	19.36665642	micronutrient (%)	plant trait
LN	A661	Ca	0.284431217	micronutrient (%)	plant trait
LN	A661	Cu	5.487184481	micronutrient (%)	plant trait
LN	A661	Fe	71.39047812	micronutrient (%)	plant trait
LN	A661	K	2.309319302	micronutrient (%)	plant trait
LN	A661	Mg	0.106738884	micronutrient (%)	plant trait
LN	A661	Mn	63.00765528	micronutrient (%)	plant trait
LN	A661	N	2.024273214	micronutrient (%)	plant trait
LN	A661	P	0.298812386	micronutrient (%)	plant trait
LN	A661	S	0.14953818	micronutrient (%)	plant trait
LN	A661	Zn	21.44314089	micronutrient (%)	plant trait
HN	A661	CC_Aug12	55.528435735	canopy coverage (%)	plant trait
HN	A661	ExG_Aug12	0.344997229698148	excess green index	plant trait
HN	A661	CHL	357.2522738	chlorophyll content (µmol/m2)	plant trait
HN	A661	DW	5.543044082	leaf dry weight (g)	plant trait
HN	A661	FW	21.2183947	leaf fresh weight (g)	plant trait
HN	A661	LA	1019.673648	leaf area (m2)	plant trait
HN	A661	B	23.47788063	micronutrient (%)	plant trait
HN	A661	Ca	0.349658137	micronutrient (%)	plant trait
HN	A661	Cu	8.294683097	micronutrient (%)	plant trait
HN	A661	Fe	91.92215462	micronutrient (%)	plant trait
HN	A661	K	2.483486871	micronutrient (%)	plant trait
HN	A661	Mg	0.137471551	micronutrient (%)	plant trait
HN	A661	Mn	70.2402686	micronutrient (%)	plant trait
HN	A661	N	2.727820225	micronutrient (%)	plant trait
HN	A661	P	0.29352788	micronutrient (%)	plant trait
HN	A661	S	0.171498872	micronutrient (%)	plant trait
HN	A661	Zn	25.54880612	micronutrient (%)	plant trait
LN	A679	CC_Aug12	68.95136801000001	canopy coverage (%)	plant trait
LN	A679	ExG_Aug12	0.3375534	excess green index	plant trait
LN	A679	CHL	292.0642616	chlorophyll content (µmol/m2)	plant trait
LN	A679	DW	5.979942261	leaf dry weight (g)	plant trait
LN	A679	FW	23.87223527	leaf fresh weight (g)	plant trait
LN	A679	LA	1104.509948	leaf area (m2)	plant trait
LN	A679	B	16.96856241	micronutrient (%)	plant trait
LN	A679	Ca	0.349573477	micronutrient (%)	plant trait
LN	A679	Cu	4.767922652	micronutrient (%)	plant trait
LN	A679	Fe	75.76917346	micronutrient (%)	plant trait
LN	A679	K	1.970158973	micronutrient (%)	plant trait
LN	A679	Mg	0.126959093	micronutrient (%)	plant trait
LN	A679	Mn	46.76712261	micronutrient (%)	plant trait
LN	A679	N	1.912407912	micronutrient (%)	plant trait
LN	A679	P	0.279541313	micronutrient (%)	plant trait
LN	A679	S	0.152783697	micronutrient (%)	plant trait
LN	A679	Zn	17.28326996	micronutrient (%)	plant trait
HN	A679	CC_Aug12	73.95242388	canopy coverage (%)	plant trait
HN	A679	ExG_Aug12	0.3861369	excess green index	plant trait
HN	A679	CHL	418.256897	chlorophyll content (µmol/m2)	plant trait
HN	A679	DW	7.332132809	leaf dry weight (g)	plant trait
HN	A679	FW	30.74026992	leaf fresh weight (g)	plant trait
HN	A679	LA	1277.585935	leaf area (m2)	plant trait
HN	A679	B	19.84010132	micronutrient (%)	plant trait
HN	A679	Ca	0.404657318	micronutrient (%)	plant trait
HN	A679	Cu	11.13972393	micronutrient (%)	plant trait
HN	A679	Fe	101.6692739	micronutrient (%)	plant trait
HN	A679	K	2.272970368	micronutrient (%)	plant trait
HN	A679	Mg	0.194815671	micronutrient (%)	plant trait
HN	A679	Mn	55.80452866	micronutrient (%)	plant trait
HN	A679	N	2.960398931	micronutrient (%)	plant trait
HN	A679	P	0.315799814	micronutrient (%)	plant trait
HN	A679	S	0.192586593	micronutrient (%)	plant trait
HN	A679	Zn	24.74654892	micronutrient (%)	plant trait
LN	A680	CC_Aug12	41.3491242	canopy coverage (%)	plant trait
LN	A680	ExG_Aug12	0.32905585000000004	excess green index	plant trait
LN	A680	CHL	313.2465287	chlorophyll content (µmol/m2)	plant trait
LN	A680	DW	7.386506392	leaf dry weight (g)	plant trait
LN	A680	FW	28.17666264	leaf fresh weight (g)	plant trait
LN	A680	LA	1220.635612	leaf area (m2)	plant trait
LN	A680	B	17.26832417	micronutrient (%)	plant trait
LN	A680	Ca	0.433875226	micronutrient (%)	plant trait
LN	A680	Fe	80.6343905	micronutrient (%)	plant trait
LN	A680	K	1.935193991	micronutrient (%)	plant trait
LN	A680	Mg	0.155267387	micronutrient (%)	plant trait
LN	A680	Mn	74.25110098	micronutrient (%)	plant trait
LN	A680	N	2.115163773	micronutrient (%)	plant trait
LN	A680	P	0.284359081	micronutrient (%)	plant trait
LN	A680	S	0.1722568	micronutrient (%)	plant trait
HN	A680	CC_Aug12	57.339480664999996	canopy coverage (%)	plant trait
HN	A680	ExG_Aug12	0.36617500000000003	excess green index	plant trait
HN	A680	CHL	411.5951182	chlorophyll content (µmol/m2)	plant trait
HN	A680	DW	7.956488263	leaf dry weight (g)	plant trait
HN	A680	FW	32.32054735	leaf fresh weight (g)	plant trait
HN	A680	LA	1403.822978	leaf area (m2)	plant trait
HN	A680	B	16.20232201	micronutrient (%)	plant trait
HN	A680	Ca	0.472597483	micronutrient (%)	plant trait
HN	A680	Cu	12.20661424	micronutrient (%)	plant trait
HN	A680	Fe	97.85518375	micronutrient (%)	plant trait
HN	A680	K	2.00903923	micronutrient (%)	plant trait
HN	A680	Mg	0.209151701	micronutrient (%)	plant trait
HN	A680	Mn	72.13970807	micronutrient (%)	plant trait
HN	A680	N	2.91202256	micronutrient (%)	plant trait
HN	A680	P	0.287959897	micronutrient (%)	plant trait
HN	A680	S	0.195222558	micronutrient (%)	plant trait
HN	A680	Zn	26.35106333	micronutrient (%)	plant trait
LN	A682	CC_Aug12	73.06746227	canopy coverage (%)	plant trait
LN	A682	ExG_Aug12	0.3182777	excess green index	plant trait
LN	A682	CHL	282.3617926	chlorophyll content (µmol/m2)	plant trait
LN	A682	DW	5.722126562	leaf dry weight (g)	plant trait
LN	A682	FW	22.17633984	leaf fresh weight (g)	plant trait
LN	A682	LA	1002.633178	leaf area (m2)	plant trait
LN	A682	B	16.36903891	micronutrient (%)	plant trait
LN	A682	Ca	0.364901068	micronutrient (%)	plant trait
LN	A682	Cu	7.285339054	micronutrient (%)	plant trait
LN	A682	Fe	80.6343905	micronutrient (%)	plant trait
LN	A682	K	2.379249266	micronutrient (%)	plant trait
LN	A682	Mg	0.11887101	micronutrient (%)	plant trait
LN	A682	Mn	57.17772047	micronutrient (%)	plant trait
LN	A682	N	2.070883757	micronutrient (%)	plant trait
LN	A682	P	0.291585734	micronutrient (%)	plant trait
LN	A682	S	0.14953818	micronutrient (%)	plant trait
LN	A682	Zn	18.7959503	micronutrient (%)	plant trait
HN	A682	CC_Aug12	69.748593075	canopy coverage (%)	plant trait
HN	A682	ExG_Aug12	0.3437176931131545	excess green index	plant trait
HN	A682	CHL	414.6484335	chlorophyll content (µmol/m2)	plant trait
HN	A682	DW	6.481402863	leaf dry weight (g)	plant trait
HN	A682	FW	26.56238632	leaf fresh weight (g)	plant trait
HN	A682	LA	1132.659735	leaf area (m2)	plant trait
HN	A682	B	26.75188201	micronutrient (%)	plant trait
HN	A682	Ca	0.385245842	micronutrient (%)	plant trait
HN	A682	Cu	12.20661424	micronutrient (%)	plant trait
HN	A682	Fe	110.7807115	micronutrient (%)	plant trait
HN	A682	K	2.417504087	micronutrient (%)	plant trait
HN	A682	Mg	0.144639566	micronutrient (%)	plant trait
HN	A682	Mn	71.00004439	micronutrient (%)	plant trait
HN	A682	N	2.952956412	micronutrient (%)	plant trait
HN	A682	P	0.313015822	micronutrient (%)	plant trait
HN	A682	S	0.189950628	micronutrient (%)	plant trait
HN	A682	Zn	24.34542031	micronutrient (%)	plant trait
LN	B10	CC_Aug12	78.89390152	canopy coverage (%)	plant trait
LN	B10	ExG_Aug12	0.3344113	excess green index	plant trait
LN	B10	CHL	239.5492805	chlorophyll content (µmol/m2)	plant trait
LN	B10	DW	5.098520618	leaf dry weight (g)	plant trait
LN	B10	FW	21.35446228	leaf fresh weight (g)	plant trait
LN	B10	LA	1048.202906	leaf area (m2)	plant trait
LN	B10	B	15.85330705	micronutrient (%)	plant trait
LN	B10	Ca	0.336883619	micronutrient (%)	plant trait
LN	B10	Cu	6.461278145	micronutrient (%)	plant trait
LN	B10	Fe	75.24637944	micronutrient (%)	plant trait
LN	B10	K	2.349424428	micronutrient (%)	plant trait
LN	B10	Mg	0.195107469	micronutrient (%)	plant trait
LN	B10	Mn	62.05184983	micronutrient (%)	plant trait
LN	B10	N	1.981669131	micronutrient (%)	plant trait
LN	B10	P	0.303960964	micronutrient (%)	plant trait
LN	B10	S	0.152131118	micronutrient (%)	plant trait
LN	B10	Zn	25.20947125	micronutrient (%)	plant trait
LN	B103	CC_Aug12	61.518767845	canopy coverage (%)	plant trait
LN	B103	ExG_Aug12	0.3382596	excess green index	plant trait
LN	B103	CHL	305.7001639	chlorophyll content (µmol/m2)	plant trait
LN	B103	DW	5.255447511	leaf dry weight (g)	plant trait
LN	B103	FW	19.48738399	leaf fresh weight (g)	plant trait
LN	B103	LA	900.7019669	leaf area (m2)	plant trait
LN	B103	B	19.36665642	micronutrient (%)	plant trait
LN	B103	Ca	0.399388147	micronutrient (%)	plant trait
LN	B103	Cu	6.20644631	micronutrient (%)	plant trait
LN	B103	Fe	77.47199942	micronutrient (%)	plant trait
LN	B103	K	2.106522404	micronutrient (%)	plant trait
LN	B103	Mg	0.171443554	micronutrient (%)	plant trait
LN	B103	N	2.094189028	micronutrient (%)	plant trait
LN	B103	P	0.289176849	micronutrient (%)	plant trait
LN	B103	S	0.1722568	micronutrient (%)	plant trait
HN	B103	CC_Aug12	66.349656955	canopy coverage (%)	plant trait
HN	B103	ExG_Aug12	0.35644091602120953	excess green index	plant trait
HN	B103	CHL	400.8622522	chlorophyll content (µmol/m2)	plant trait
HN	B103	LA	886.9065926	leaf area (m2)	plant trait
HN	B103	B	23.1141027	micronutrient (%)	plant trait
HN	B103	Ca	0.388481088	micronutrient (%)	plant trait
HN	B103	Cu	9.717203514	micronutrient (%)	plant trait
HN	B103	Fe	92.76973021	micronutrient (%)	plant trait
HN	B103	K	2.426930199	micronutrient (%)	plant trait
HN	B103	Mg	0.191231663	micronutrient (%)	plant trait
HN	B103	N	2.794802893	micronutrient (%)	plant trait
HN	B103	P	0.29352788	micronutrient (%)	plant trait
HN	B103	S	0.184678698	micronutrient (%)	plant trait
HN	B103	Zn	45.20410765	micronutrient (%)	plant trait
LN	B104	CC_Aug12	71.14749344	canopy coverage (%)	plant trait
LN	B104	ExG_Aug12	0.35102115	excess green index	plant trait
LN	B104	CHL	270.7654483	chlorophyll content (µmol/m2)	plant trait
LN	B104	DW	6.068056487	leaf dry weight (g)	plant trait
LN	B104	FW	24.41771916	leaf fresh weight (g)	plant trait
LN	B104	LA	1071.072383	leaf area (m2)	plant trait
LN	B104	B	12.1723744	micronutrient (%)	plant trait
LN	B104	Ca	0.288263115	micronutrient (%)	plant trait
LN	B104	Cu	5.487184481	micronutrient (%)	plant trait
LN	B104	Fe	72.85004324	micronutrient (%)	plant trait
LN	B104	K	1.977151969	micronutrient (%)	plant trait
LN	B104	Mg	0.151223345	micronutrient (%)	plant trait
LN	B104	N	1.907746858	micronutrient (%)	plant trait
LN	B104	P	0.293994618	micronutrient (%)	plant trait
LN	B104	S	0.152783697	micronutrient (%)	plant trait
LN	B104	Zn	20.68680072	micronutrient (%)	plant trait
HN	B104	CC_Aug12	64.55436006	canopy coverage (%)	plant trait
HN	B104	ExG_Aug12	0.3623137930140855	excess green index	plant trait
HN	B104	CHL	414.1549684	chlorophyll content (µmol/m2)	plant trait
HN	B104	DW	8.697682164	leaf dry weight (g)	plant trait
HN	B104	FW	37.02116903	leaf fresh weight (g)	plant trait
HN	B104	LA	1372.607445	leaf area (m2)	plant trait
HN	B104	B	12.92832063	micronutrient (%)	plant trait
HN	B104	Ca	0.352893382	micronutrient (%)	plant trait
HN	B104	Cu	10.42846372	micronutrient (%)	plant trait
HN	B104	Fe	104.8476824	micronutrient (%)	plant trait
HN	B104	K	2.376657601	micronutrient (%)	plant trait
HN	B104	Mg	0.155391589	micronutrient (%)	plant trait
HN	B104	Mn	75.55869911	micronutrient (%)	plant trait
HN	B104	N	2.718517077	micronutrient (%)	plant trait
HN	B104	P	0.301879855	micronutrient (%)	plant trait
HN	B104	S	0.176770802	micronutrient (%)	plant trait
HN	B104	Zn	25.14767752	micronutrient (%)	plant trait
LN	B105	CC_Aug12	52.635440204999995	canopy coverage (%)	plant trait
LN	B105	ExG_Aug12	0.34423855000000003	excess green index	plant trait
LN	B105	CHL	254.7986225	chlorophyll content (µmol/m2)	plant trait
LN	B105	DW	5.092273018	leaf dry weight (g)	plant trait
LN	B105	FW	20.74269628	leaf fresh weight (g)	plant trait
LN	B105	LA	963.3481392	leaf area (m2)	plant trait
LN	B105	B	14.87023016	micronutrient (%)	plant trait
LN	B105	Ca	0.384060556	micronutrient (%)	plant trait
LN	B105	Cu	6.20644631	micronutrient (%)	plant trait
LN	B105	Fe	69.44439131	micronutrient (%)	plant trait
LN	B105	K	2.124004895	micronutrient (%)	plant trait
LN	B105	Mg	0.159311429	micronutrient (%)	plant trait
LN	B105	Mn	63.84050311	micronutrient (%)	plant trait
LN	B105	N	1.889102641	micronutrient (%)	plant trait
LN	B105	P	0.31808346	micronutrient (%)	plant trait
LN	B105	S	0.143047145	micronutrient (%)	plant trait
LN	B105	Zn	23.7121614	micronutrient (%)	plant trait
HN	B105	CC_Aug12	36.864583925	canopy coverage (%)	plant trait
HN	B105	ExG_Aug12	0.3563074	excess green index	plant trait
HN	B105	CHL	391.8873557	chlorophyll content (µmol/m2)	plant trait
HN	B105	DW	7.083851108	leaf dry weight (g)	plant trait
HN	B105	FW	28.80613902	leaf fresh weight (g)	plant trait
HN	B105	LA	1253.961502	leaf area (m2)	plant trait
HN	B105	B	15.83854408	micronutrient (%)	plant trait
HN	B105	Ca	0.469362237	micronutrient (%)	plant trait
HN	B105	Cu	11.13972393	micronutrient (%)	plant trait
HN	B105	Fe	93.6173058	micronutrient (%)	plant trait
HN	B105	K	2.254118144	micronutrient (%)	plant trait
HN	B105	Mg	0.198399678	micronutrient (%)	plant trait
HN	B105	Mn	74.03914753	micronutrient (%)	plant trait
HN	B105	N	2.7575903	micronutrient (%)	plant trait
HN	B105	P	0.287959897	micronutrient (%)	plant trait
HN	B105	S	0.182042732	micronutrient (%)	plant trait
HN	B105	Zn	29.56009215	micronutrient (%)	plant trait
LN	B109	CC_Aug12	33.177347455	canopy coverage (%)	plant trait
LN	B109	ExG_Aug12	0.3389596	excess green index	plant trait
LN	B109	CHL	326.6493387	chlorophyll content (µmol/m2)	plant trait
LN	B109	DW	6.694646541	leaf dry weight (g)	plant trait
LN	B109	FW	26.20802526	leaf fresh weight (g)	plant trait
LN	B109	LA	1117.727882	leaf area (m2)	plant trait
LN	B109	B	11.57285089	micronutrient (%)	plant trait
LN	B109	Ca	0.338077785	micronutrient (%)	plant trait
LN	B109	Cu	6.566077225	micronutrient (%)	plant trait
LN	B109	Fe	75.76917346	micronutrient (%)	plant trait
LN	B109	K	2.106522404	micronutrient (%)	plant trait
LN	B109	Mg	0.139091219	micronutrient (%)	plant trait
LN	B109	Mn	59.25984005	micronutrient (%)	plant trait
LN	B109	N	2.15012168	micronutrient (%)	plant trait
LN	B109	P	0.291585734	micronutrient (%)	plant trait
LN	B109	S	0.185238868	micronutrient (%)	plant trait
LN	B109	Zn	21.06497081	micronutrient (%)	plant trait
HN	B109	CC_Aug12	44.34399076	canopy coverage (%)	plant trait
HN	B109	ExG_Aug12	0.3422098	excess green index	plant trait
HN	B109	CHL	461.7743507	chlorophyll content (µmol/m2)	plant trait
HN	B109	DW	8.212072367	leaf dry weight (g)	plant trait
HN	B109	FW	32.56181108	leaf fresh weight (g)	plant trait
HN	B109	LA	1272.615913	leaf area (m2)	plant trait
HN	B109	B	15.47476615	micronutrient (%)	plant trait
HN	B109	Ca	0.417598301	micronutrient (%)	plant trait
HN	B109	Cu	10.78409383	micronutrient (%)	plant trait
HN	B109	Fe	96.16003257	micronutrient (%)	plant trait
HN	B109	K	2.250976107	micronutrient (%)	plant trait
HN	B109	Mg	0.209151701	micronutrient (%)	plant trait
HN	B109	Mn	94.55309377	micronutrient (%)	plant trait
HN	B109	N	2.839458004	micronutrient (%)	plant trait
HN	B109	P	0.285175905	micronutrient (%)	plant trait
HN	B109	S	0.184678698	micronutrient (%)	plant trait
HN	B109	Zn	23.94429171	micronutrient (%)	plant trait
LN	B14A	CC_Aug12	30.612718200000003	canopy coverage (%)	plant trait
LN	B14A	ExG_Aug12	0.29895755	excess green index	plant trait
LN	B14A	CHL	273.4751468	chlorophyll content (µmol/m2)	plant trait
LN	B14A	FW	24.19742759	leaf fresh weight (g)	plant trait
LN	B14A	LA	1100.803489	leaf area (m2)	plant trait
LN	B14A	B	14.5704684	micronutrient (%)	plant trait
LN	B14A	Ca	0.303590706	micronutrient (%)	plant trait
LN	B14A	Cu	6.20644631	micronutrient (%)	plant trait
LN	B14A	Fe	75.52591261	micronutrient (%)	plant trait
LN	B14A	K	2.061067927	micronutrient (%)	plant trait
LN	B14A	Mg	0.187619722	micronutrient (%)	plant trait
LN	B14A	Mn	46.35069869	micronutrient (%)	plant trait
LN	B14A	N	2.000967943	micronutrient (%)	plant trait
LN	B14A	P	0.320492344	micronutrient (%)	plant trait
LN	B14A	S	0.1722568	micronutrient (%)	plant trait
HN	B14A	CC_Aug12	26.774757585	canopy coverage (%)	plant trait
HN	B14A	ExG_Aug12	0.3323744	excess green index	plant trait
HN	B14A	CHL	376.5590959	chlorophyll content (µmol/m2)	plant trait
HN	B14A	DW	7.496436876	leaf dry weight (g)	plant trait
HN	B14A	FW	30.29795308	leaf fresh weight (g)	plant trait
HN	B14A	LA	1310.868043	leaf area (m2)	plant trait
HN	B14A	B	20.56765718	micronutrient (%)	plant trait
HN	B14A	Ca	0.401422072	micronutrient (%)	plant trait
HN	B14A	Cu	10.78409383	micronutrient (%)	plant trait
HN	B14A	Fe	102.0930617	micronutrient (%)	plant trait
HN	B14A	K	2.298106667	micronutrient (%)	plant trait
HN	B14A	Mg	0.248575783	micronutrient (%)	plant trait
HN	B14A	Mn	58.08385601	micronutrient (%)	plant trait
HN	B14A	N	2.887834375	micronutrient (%)	plant trait
HN	B14A	P	0.313015822	micronutrient (%)	plant trait
HN	B14A	S	0.182042732	micronutrient (%)	plant trait
HN	B14A	Zn	30.36234935	micronutrient (%)	plant trait
LN	B164	CC_Aug12	68.22893048	canopy coverage (%)	plant trait
LN	B164	ExG_Aug12	0.30622735	excess green index	plant trait
LN	B164	CHL	244.804788	chlorophyll content (µmol/m2)	plant trait
LN	B164	DW	5.030266711	leaf dry weight (g)	plant trait
LN	B164	FW	19.95594066	leaf fresh weight (g)	plant trait
LN	B164	LA	968.1882778	leaf area (m2)	plant trait
LN	B164	B	15.46975366	micronutrient (%)	plant trait
LN	B164	Ca	0.399388147	micronutrient (%)	plant trait
LN	B164	Cu	5.846815396	micronutrient (%)	plant trait
LN	B164	Fe	75.0393909	micronutrient (%)	plant trait
LN	B164	K	1.973655471	micronutrient (%)	plant trait
LN	B164	Mg	0.18357568	micronutrient (%)	plant trait
LN	B164	Mn	56.76129656	micronutrient (%)	plant trait
LN	B164	N	1.945035292	micronutrient (%)	plant trait
LN	B164	P	0.277132428	micronutrient (%)	plant trait
LN	B164	S	0.136556111	micronutrient (%)	plant trait
LN	B164	Zn	19.93046055	micronutrient (%)	plant trait
HN	B164	CC_Aug12	74.469306235	canopy coverage (%)	plant trait
HN	B164	ExG_Aug12	0.34445760000000003	excess green index	plant trait
HN	B164	CHL	384.1152803	chlorophyll content (µmol/m2)	plant trait
HN	B164	DW	6.225818759	leaf dry weight (g)	plant trait
HN	B164	FW	24.62825542	leaf fresh weight (g)	plant trait
HN	B164	LA	1164.906726	leaf area (m2)	plant trait
HN	B164	B	18.38498959	micronutrient (%)	plant trait
HN	B164	Ca	0.53083191	micronutrient (%)	plant trait
HN	B164	Cu	10.78409383	micronutrient (%)	plant trait
HN	B164	Fe	102.9406373	micronutrient (%)	plant trait
HN	B164	K	2.197561471	micronutrient (%)	plant trait
HN	B164	Mg	0.244991775	micronutrient (%)	plant trait
HN	B164	Mn	60.36318337	micronutrient (%)	plant trait
HN	B164	N	2.96412019	micronutrient (%)	plant trait
HN	B164	P	0.335287755	micronutrient (%)	plant trait
HN	B164	S	0.195222558	micronutrient (%)	plant trait
HN	B164	Zn	35.57702119	micronutrient (%)	plant trait
LN	B2	CC_Aug12	11.6181222805	canopy coverage (%)	plant trait
LN	B2	ExG_Aug12	0.30903895000000003	excess green index	plant trait
HN	B2	CC_Aug12	16.149706625	canopy coverage (%)	plant trait
HN	B2	ExG_Aug12	0.32173435	excess green index	plant trait
HN	B2	CHL	358.8573141	chlorophyll content (µmol/m2)	plant trait
HN	B2	DW	7.684593856	leaf dry weight (g)	plant trait
HN	B2	FW	35.99529488	leaf fresh weight (g)	plant trait
HN	B2	LA	1347.699	leaf area (m2)	plant trait
HN	B2	B	15.63323691	micronutrient (%)	plant trait
HN	B2	Ca	0.359151262	micronutrient (%)	plant trait
HN	B2	Cu	9.572029862	micronutrient (%)	plant trait
HN	B2	Fe	99.69830054	micronutrient (%)	plant trait
HN	B2	K	2.361489239	micronutrient (%)	plant trait
HN	B2	Mg	0.175067191	micronutrient (%)	plant trait
HN	B2	Mn	56.194383	micronutrient (%)	plant trait
HN	B2	N	2.719453587	micronutrient (%)	plant trait
HN	B2	P	0.272592876	micronutrient (%)	plant trait
HN	B2	S	0.164610139	micronutrient (%)	plant trait
HN	B2	Zn	18.60293893	micronutrient (%)	plant trait
LN	B37	CC_Aug12	59.259447605	canopy coverage (%)	plant trait
LN	B37	ExG_Aug12	0.33973115	excess green index	plant trait
LN	B37	CHL	256.5468151	chlorophyll content (µmol/m2)	plant trait
LN	B37	DW	5.944043872	leaf dry weight (g)	plant trait
LN	B37	FW	23.68691061	leaf fresh weight (g)	plant trait
LN	B37	LA	1042.437977	leaf area (m2)	plant trait
LN	B37	B	16.66880066	micronutrient (%)	plant trait
LN	B37	Ca	0.4760261	micronutrient (%)	plant trait
LN	B37	Cu	5.846815396	micronutrient (%)	plant trait
LN	B37	Fe	68.4713479	micronutrient (%)	plant trait
LN	B37	K	1.854774531	micronutrient (%)	plant trait
LN	B37	Mg	0.191663764	micronutrient (%)	plant trait
LN	B37	Mn	38.43864431	micronutrient (%)	plant trait
LN	B37	N	1.891433168	micronutrient (%)	plant trait
LN	B37	P	0.286767965	micronutrient (%)	plant trait
LN	B37	S	0.159274731	micronutrient (%)	plant trait
LN	B37	Zn	21.82131098	micronutrient (%)	plant trait
HN	B37	CC_Aug12	43.28553118	canopy coverage (%)	plant trait
HN	B37	ExG_Aug12	0.3578964	excess green index	plant trait
HN	B37	CHL	430.6860493	chlorophyll content (µmol/m2)	plant trait
HN	B37	DW	7.354040018	leaf dry weight (g)	plant trait
HN	B37	FW	31.21877632	leaf fresh weight (g)	plant trait
HN	B37	LA	1242.507553	leaf area (m2)	plant trait
HN	B37	B	17.2936558	micronutrient (%)	plant trait
HN	B37	Ca	0.585831091	micronutrient (%)	plant trait
HN	B37	Cu	11.49535404	micronutrient (%)	plant trait
HN	B37	Fe	100.1860166	micronutrient (%)	plant trait
HN	B37	K	2.109584425	micronutrient (%)	plant trait
HN	B37	Mg	0.25215979	micronutrient (%)	plant trait
HN	B37	Mn	59.98329548	micronutrient (%)	plant trait
HN	B37	N	2.848761152	micronutrient (%)	plant trait
HN	B37	P	0.313015822	micronutrient (%)	plant trait
HN	B37	S	0.189950628	micronutrient (%)	plant trait
HN	B37	Zn	28.75783494	micronutrient (%)	plant trait
LN	B46	CC_Aug12	73.30825855	canopy coverage (%)	plant trait
LN	B46	ExG_Aug12	0.35239390000000004	excess green index	plant trait
LN	B46	CHL	257.6248672	chlorophyll content (µmol/m2)	plant trait
LN	B46	DW	5.229339592	leaf dry weight (g)	plant trait
LN	B46	FW	21.95604826	leaf fresh weight (g)	plant trait
LN	B46	LA	935.7731132	leaf area (m2)	plant trait
LN	B46	B	15.76951541	micronutrient (%)	plant trait
LN	B46	Ca	0.303590706	micronutrient (%)	plant trait
LN	B46	Cu	6.92570814	micronutrient (%)	plant trait
LN	B46	Fe	71.87699983	micronutrient (%)	plant trait
LN	B46	K	2.375752768	micronutrient (%)	plant trait
LN	B46	Mg	0.11887101	micronutrient (%)	plant trait
LN	B46	Mn	46.35069869	micronutrient (%)	plant trait
LN	B46	N	2.000967943	micronutrient (%)	plant trait
LN	B46	P	0.289176849	micronutrient (%)	plant trait
LN	B46	S	0.139801628	micronutrient (%)	plant trait
LN	B46	Zn	22.95582123	micronutrient (%)	plant trait
HN	B46	CC_Aug12	79.11214999500001	canopy coverage (%)	plant trait
HN	B46	ExG_Aug12	0.3713368	excess green index	plant trait
HN	B46	CHL	374.1534536	chlorophyll content (µmol/m2)	plant trait
HN	B46	DW	7.321179205	leaf dry weight (g)	plant trait
HN	B46	FW	33.38210777	leaf fresh weight (g)	plant trait
HN	B46	LA	1412.251314	leaf area (m2)	plant trait
HN	B46	B	21.65899097	micronutrient (%)	plant trait
HN	B46	Ca	0.39495158	micronutrient (%)	plant trait
HN	B46	Cu	12.91787445	micronutrient (%)	plant trait
HN	B46	Fe	98.06707765	micronutrient (%)	plant trait
HN	B46	K	2.694003374	micronutrient (%)	plant trait
HN	B46	Mg	0.187647656	micronutrient (%)	plant trait
HN	B46	Mn	70.62015649	micronutrient (%)	plant trait
HN	B46	N	2.856203671	micronutrient (%)	plant trait
HN	B46	P	0.285175905	micronutrient (%)	plant trait
HN	B46	S	0.184678698	micronutrient (%)	plant trait
LN	B57	CC_Aug12	71.415905535	canopy coverage (%)	plant trait
LN	B57	ExG_Aug12	0.33437300000000003	excess green index	plant trait
LN	B57	CHL	265.5208705	chlorophyll content (µmol/m2)	plant trait
LN	B57	DW	5.366406167	leaf dry weight (g)	plant trait
LN	B57	FW	22.63440644	leaf fresh weight (g)	plant trait
LN	B57	LA	980.8279014	leaf area (m2)	plant trait
LN	B57	Ca	0.311254501	micronutrient (%)	plant trait
LN	B57	Cu	5.127553566	micronutrient (%)	plant trait
LN	B57	Fe	71.39047812	micronutrient (%)	plant trait
LN	B57	K	2.298829807	micronutrient (%)	plant trait
LN	B57	Mg	0.139091219	micronutrient (%)	plant trait
LN	B57	Mn	47.59997043	micronutrient (%)	plant trait
LN	B57	N	1.809864718	micronutrient (%)	plant trait
LN	B57	P	0.291585734	micronutrient (%)	plant trait
LN	B57	S	0.133310594	micronutrient (%)	plant trait
HN	B57	CC_Aug12	64.100513885	canopy coverage (%)	plant trait
HN	B57	ExG_Aug12	0.3720859	excess green index	plant trait
HN	B57	CHL	371.4085539	chlorophyll content (µmol/m2)	plant trait
HN	B57	DW	6.506961274	leaf dry weight (g)	plant trait
HN	B57	FW	27.01274529	leaf fresh weight (g)	plant trait
HN	B57	LA	1125.86125	leaf area (m2)	plant trait
HN	B57	B	10.74565304	micronutrient (%)	plant trait
HN	B57	Ca	0.37877535	micronutrient (%)	plant trait
HN	B57	Fe	89.16753396	micronutrient (%)	plant trait
HN	B57	K	2.433214274	micronutrient (%)	plant trait
HN	B57	Mg	0.201983686	micronutrient (%)	plant trait
HN	B57	Mn	56.18441655	micronutrient (%)	plant trait
HN	B57	N	2.564084816	micronutrient (%)	plant trait
HN	B57	P	0.271255947	micronutrient (%)	plant trait
HN	B57	S	0.166226942	micronutrient (%)	plant trait
LN	B64	CC_Aug12	60.476041805	canopy coverage (%)	plant trait
LN	B64	ExG_Aug12	0.33106245	excess green index	plant trait
LN	B64	CHL	254.7403494	chlorophyll content (µmol/m2)	plant trait
LN	B64	DW	5.699282133	leaf dry weight (g)	plant trait
LN	B64	FW	24.03657977	leaf fresh weight (g)	plant trait
LN	B64	LA	1104.398326	leaf area (m2)	plant trait
LN	B64	B	12.1723744	micronutrient (%)	plant trait
LN	B64	Ca	0.341909682	micronutrient (%)	plant trait
LN	B64	Cu	5.846815396	micronutrient (%)	plant trait
LN	B64	Fe	69.44439131	micronutrient (%)	plant trait
LN	B64	K	2.256871828	micronutrient (%)	plant trait
LN	B64	Mg	0.187619722	micronutrient (%)	plant trait
LN	B64	Mn	40.9371878	micronutrient (%)	plant trait
LN	B64	N	1.92173002	micronutrient (%)	plant trait
LN	B64	P	0.281950197	micronutrient (%)	plant trait
LN	B64	S	0.175502317	micronutrient (%)	plant trait
LN	B64	Zn	16.52692979	micronutrient (%)	plant trait
HN	B64	CC_Aug12	70.95556963499999	canopy coverage (%)	plant trait
HN	B64	ExG_Aug12	0.35044932186458555	excess green index	plant trait
HN	B64	CHL	335.9715913	chlorophyll content (µmol/m2)	plant trait
HN	B64	DW	6.514263677	leaf dry weight (g)	plant trait
HN	B64	FW	28.05822145	leaf fresh weight (g)	plant trait
HN	B64	LA	1166.131309	leaf area (m2)	plant trait
HN	B64	B	17.2936558	micronutrient (%)	plant trait
HN	B64	Ca	0.414363056	micronutrient (%)	plant trait
HN	B64	Cu	8.294683097	micronutrient (%)	plant trait
HN	B64	Fe	90.01510955	micronutrient (%)	plant trait
HN	B64	K	2.200703509	micronutrient (%)	plant trait
HN	B64	Mg	0.234239753	micronutrient (%)	plant trait
HN	B64	Mn	54.28497708	micronutrient (%)	plant trait
HN	B64	N	2.662698188	micronutrient (%)	plant trait
HN	B64	P	0.282391914	micronutrient (%)	plant trait
HN	B64	S	0.179406767	micronutrient (%)	plant trait
HN	B64	Zn	21.9386487	micronutrient (%)	plant trait
LN	B68	CC_Aug12	61.368155220000006	canopy coverage (%)	plant trait
LN	B68	ExG_Aug12	0.3197239	excess green index	plant trait
LN	B68	CHL	285.9455875	chlorophyll content (µmol/m2)	plant trait
LN	B68	DW	6.250811919	leaf dry weight (g)	plant trait
LN	B68	FW	26.51573413	leaf fresh weight (g)	plant trait
LN	B68	LA	996.471383	leaf area (m2)	plant trait
LN	B68	B	14.27070665	micronutrient (%)	plant trait
LN	B68	Ca	0.292095013	micronutrient (%)	plant trait
LN	B68	Cu	5.846815396	micronutrient (%)	plant trait
LN	B68	Fe	75.28265176	micronutrient (%)	plant trait
LN	B68	K	2.137990888	micronutrient (%)	plant trait
LN	B68	Mg	0.143135261	micronutrient (%)	plant trait
LN	B68	Mn	62.17480745	micronutrient (%)	plant trait
LN	B68	N	1.956687927	micronutrient (%)	plant trait
LN	B68	P	0.289176849	micronutrient (%)	plant trait
LN	B68	S	0.156029214	micronutrient (%)	plant trait
LN	B68	Zn	17.66144005	micronutrient (%)	plant trait
HN	B68	CC_Aug12	66.87048448	canopy coverage (%)	plant trait
HN	B68	ExG_Aug12	0.357695	excess green index	plant trait
HN	B68	CHL	379.7974607	chlorophyll content (µmol/m2)	plant trait
HN	B68	DW	7.058292698	leaf dry weight (g)	plant trait
HN	B68	FW	27.84510515	leaf fresh weight (g)	plant trait
HN	B68	LA	1237.964378	leaf area (m2)	plant trait
HN	B68	B	20.93143511	micronutrient (%)	plant trait
HN	B68	Ca	0.375540104	micronutrient (%)	plant trait
HN	B68	Cu	10.78409383	micronutrient (%)	plant trait
HN	B68	Fe	100.8216983	micronutrient (%)	plant trait
HN	B68	K	1.987044968	micronutrient (%)	plant trait
HN	B68	Mg	0.230655745	micronutrient (%)	plant trait
HN	B68	Mn	74.41903543	micronutrient (%)	plant trait
HN	B68	N	2.852482412	micronutrient (%)	plant trait
HN	B68	P	0.315799814	micronutrient (%)	plant trait
HN	B68	S	0.179406767	micronutrient (%)	plant trait
HN	B68	Zn	33.97250678	micronutrient (%)	plant trait
LN	B73	CC_Aug12	37.380265304999995	canopy coverage (%)	plant trait
LN	B73	ExG_Aug12	0.33219885000000005	excess green index	plant trait
LN	B73	CHL	310.0123724	chlorophyll content (µmol/m2)	plant trait
LN	B73	DW	6.423776882	leaf dry weight (g)	plant trait
LN	B73	FW	24.96669974	leaf fresh weight (g)	plant trait
LN	B73	LA	1135.831151	leaf area (m2)	plant trait
LN	B73	B	15.16999191	micronutrient (%)	plant trait
LN	B73	Ca	0.376396761	micronutrient (%)	plant trait
LN	B73	Cu	6.92570814	micronutrient (%)	plant trait
LN	B73	Fe	76.98547772	micronutrient (%)	plant trait
LN	B73	K	2.137990888	micronutrient (%)	plant trait
LN	B73	Mg	0.155267387	micronutrient (%)	plant trait
LN	B73	Mn	60.92553571	micronutrient (%)	plant trait
LN	B73	N	2.005628997	micronutrient (%)	plant trait
LN	B73	P	0.286767965	micronutrient (%)	plant trait
LN	B73	S	0.1722568	micronutrient (%)	plant trait
HN	B73	CC_Aug12	43.47938301	canopy coverage (%)	plant trait
HN	B73	ExG_Aug12	0.3680517	excess green index	plant trait
HN	B73	CHL	411.1941778	chlorophyll content (µmol/m2)	plant trait
HN	B73	DW	6.642055729	leaf dry weight (g)	plant trait
HN	B73	FW	28.00996871	leaf fresh weight (g)	plant trait
HN	B73	LA	1198.443407	leaf area (m2)	plant trait
HN	B73	B	16.92987787	micronutrient (%)	plant trait
HN	B73	Ca	0.449950761	micronutrient (%)	plant trait
HN	B73	Cu	11.85098414	micronutrient (%)	plant trait
HN	B73	Fe	102.7287434	micronutrient (%)	plant trait
HN	B73	K	2.159857023	micronutrient (%)	plant trait
HN	B73	Mg	0.248575783	micronutrient (%)	plant trait
HN	B73	Mn	73.27937175	micronutrient (%)	plant trait
HN	B73	N	2.906440671	micronutrient (%)	plant trait
HN	B73	P	0.27682393	micronutrient (%)	plant trait
HN	B73	S	0.189950628	micronutrient (%)	plant trait
LN	B75	CC_Aug12	39.727170834999995	canopy coverage (%)	plant trait
LN	B75	ExG_Aug12	0.35521025	excess green index	plant trait
LN	B75	CHL	317.1799621	chlorophyll content (µmol/m2)	plant trait
LN	B75	DW	5.552425089	leaf dry weight (g)	plant trait
LN	B75	FW	23.51557272	leaf fresh weight (g)	plant trait
LN	B75	LA	1050.004631	leaf area (m2)	plant trait
LN	B75	B	11.57285089	micronutrient (%)	plant trait
LN	B75	Ca	0.322750194	micronutrient (%)	plant trait
LN	B75	Cu	7.644969969	micronutrient (%)	plant trait
LN	B75	Fe	85.98612924	micronutrient (%)	plant trait
LN	B75	K	2.554074178	micronutrient (%)	plant trait
LN	B75	Mg	0.135047177	micronutrient (%)	plant trait
LN	B75	Mn	56.76129656	micronutrient (%)	plant trait
LN	B75	N	2.124485881	micronutrient (%)	plant trait
LN	B75	P	0.313265691	micronutrient (%)	plant trait
LN	B75	S	0.169011283	micronutrient (%)	plant trait
HN	B75	CC_Aug12	44.96812439	canopy coverage (%)	plant trait
HN	B75	ExG_Aug12	0.35310928598403146	excess green index	plant trait
HN	B75	CHL	348.2465357	chlorophyll content (µmol/m2)	plant trait
HN	B75	DW	6.663962937	leaf dry weight (g)	plant trait
HN	B75	LA	1161.329173	leaf area (m2)	plant trait
HN	B75	Ca	0.343187645	micronutrient (%)	plant trait
HN	B75	Cu	10.07283362	micronutrient (%)	plant trait
HN	B75	Fe	93.40541191	micronutrient (%)	plant trait
HN	B75	K	2.194419434	micronutrient (%)	plant trait
HN	B75	Mg	0.191231663	micronutrient (%)	plant trait
HN	B75	Mn	50.86598604	micronutrient (%)	plant trait
HN	B75	N	2.673861966	micronutrient (%)	plant trait
HN	B75	P	0.321367797	micronutrient (%)	plant trait
HN	B75	S	0.179406767	micronutrient (%)	plant trait
LN	B76	CC_Aug12	75.482937225	canopy coverage (%)	plant trait
LN	B76	ExG_Aug12	0.3518251	excess green index	plant trait
LN	B76	CHL	306.9530353	chlorophyll content (µmol/m2)	plant trait
LN	B76	DW	6.94593526	leaf dry weight (g)	plant trait
LN	B76	FW	26.81295292	leaf fresh weight (g)	plant trait
LN	B76	LA	1157.794273	leaf area (m2)	plant trait
LN	B76	B	14.27070665	micronutrient (%)	plant trait
LN	B76	Ca	0.368732966	micronutrient (%)	plant trait
LN	B76	Cu	6.566077225	micronutrient (%)	plant trait
LN	B76	Fe	76.98547772	micronutrient (%)	plant trait
LN	B76	K	2.064564425	micronutrient (%)	plant trait
LN	B76	Mg	0.139091219	micronutrient (%)	plant trait
LN	B76	Mn	47.18354652	micronutrient (%)	plant trait
LN	B76	N	2.033595323	micronutrient (%)	plant trait
LN	B76	P	0.291585734	micronutrient (%)	plant trait
LN	B76	S	0.14953818	micronutrient (%)	plant trait
LN	B76	Zn	19.55229047	micronutrient (%)	plant trait
HN	B76	CC_Aug12	78.59050457500001	canopy coverage (%)	plant trait
HN	B76	ExG_Aug12	0.37767152127339754	excess green index	plant trait
HN	B76	CHL	369.9644268	chlorophyll content (µmol/m2)	plant trait
HN	B76	DW	7.194912359	leaf dry weight (g)	plant trait
HN	B76	FW	29.7763997	leaf fresh weight (g)	plant trait
HN	B76	LA	1168.853806	leaf area (m2)	plant trait
HN	B76	B	16.43099552	micronutrient (%)	plant trait
HN	B76	Ca	0.402010563	micronutrient (%)	plant trait
HN	B76	Cu	8.998320675	micronutrient (%)	plant trait
HN	B76	Fe	92.70781882	micronutrient (%)	plant trait
HN	B76	K	2.136775808	micronutrient (%)	plant trait
HN	B76	Mg	0.18642795	micronutrient (%)	plant trait
HN	B76	Mn	53.949955	micronutrient (%)	plant trait
HN	B76	N	2.616320231	micronutrient (%)	plant trait
HN	B76	P	0.270888126	micronutrient (%)	plant trait
HN	B76	S	0.168722114	micronutrient (%)	plant trait
HN	B76	Zn	21.84313342	micronutrient (%)	plant trait
LN	B77	CC_Aug12	69.80901268	canopy coverage (%)	plant trait
LN	B77	ExG_Aug12	0.32509005	excess green index	plant trait
LN	B77	DW	5.141225366	leaf dry weight (g)	plant trait
LN	B77	FW	21.54693535	leaf fresh weight (g)	plant trait
LN	B77	LA	1008.130721	leaf area (m2)	plant trait
LN	B77	B	14.5704684	micronutrient (%)	plant trait
LN	B77	Ca	0.303590706	micronutrient (%)	plant trait
LN	B77	Fe	80.14786879	micronutrient (%)	plant trait
LN	B77	K	2.19393486	micronutrient (%)	plant trait
LN	B77	Mg	0.106738884	micronutrient (%)	plant trait
LN	B77	Mn	40.52076388	micronutrient (%)	plant trait
LN	B77	P	0.286767965	micronutrient (%)	plant trait
LN	B77	S	0.14953818	micronutrient (%)	plant trait
HN	B77	CC_Aug12	67.58258831	canopy coverage (%)	plant trait
HN	B77	ExG_Aug12	0.37147430000000004	excess green index	plant trait
HN	B77	CHL	413.7231864	chlorophyll content (µmol/m2)	plant trait
HN	B77	DW	8.288747598	leaf dry weight (g)	plant trait
HN	B77	FW	34.65678448	leaf fresh weight (g)	plant trait
HN	B77	LA	1389.944368	leaf area (m2)	plant trait
HN	B77	B	17.65743373	micronutrient (%)	plant trait
HN	B77	Ca	0.320540923	micronutrient (%)	plant trait
HN	B77	Cu	12.91787445	micronutrient (%)	plant trait
HN	B77	Fe	104.6357885	micronutrient (%)	plant trait
HN	B77	K	2.166141098	micronutrient (%)	plant trait
HN	B77	Mg	0.162559603	micronutrient (%)	plant trait
HN	B77	Mn	51.24587394	micronutrient (%)	plant trait
HN	B77	N	2.945513894	micronutrient (%)	plant trait
HN	B77	P	0.315799814	micronutrient (%)	plant trait
HN	B77	S	0.189950628	micronutrient (%)	plant trait
HN	B77	Zn	23.54316311	micronutrient (%)	plant trait
LN	B79	CC_Aug12	53.380754859999996	canopy coverage (%)	plant trait
LN	B79	ExG_Aug12	0.32649870000000003	excess green index	plant trait
LN	B79	CHL	256.8964536	chlorophyll content (µmol/m2)	plant trait
LN	B79	DW	5.585059987	leaf dry weight (g)	plant trait
LN	B79	FW	24.38974563	leaf fresh weight (g)	plant trait
LN	B79	LA	1004.228411	leaf area (m2)	plant trait
LN	B79	B	12.47213615	micronutrient (%)	plant trait
LN	B79	Ca	0.387892454	micronutrient (%)	plant trait
LN	B79	Fe	74.5528692	micronutrient (%)	plant trait
LN	B79	K	2.651976129	micronutrient (%)	plant trait
LN	B79	Mg	0.163355471	micronutrient (%)	plant trait
LN	B79	Mn	42.18645954	micronutrient (%)	plant trait
LN	B79	N	1.774906811	micronutrient (%)	plant trait
LN	B79	P	0.289176849	micronutrient (%)	plant trait
LN	B79	S	0.143047145	micronutrient (%)	plant trait
LN	B79	Zn	15.01424945	micronutrient (%)	plant trait
HN	B79	CC_Aug12	60.52892233	canopy coverage (%)	plant trait
HN	B79	ExG_Aug12	0.349731269481107	excess green index	plant trait
HN	B79	CHL	352.595197	chlorophyll content (µmol/m2)	plant trait
HN	B79	DW	6.171050737	leaf dry weight (g)	plant trait
HN	B79	FW	26.27286985	leaf fresh weight (g)	plant trait
HN	B79	LA	1108.916427	leaf area (m2)	plant trait
HN	B79	B	15.47476615	micronutrient (%)	plant trait
HN	B79	Ca	0.501714696	micronutrient (%)	plant trait
HN	B79	Cu	9.36157341	micronutrient (%)	plant trait
HN	B79	Fe	92.76973021	micronutrient (%)	plant trait
HN	B79	K	2.769412271	micronutrient (%)	plant trait
HN	B79	Mg	0.184063648	micronutrient (%)	plant trait
HN	B79	Mn	55.04475287	micronutrient (%)	plant trait
HN	B79	N	2.744565892	micronutrient (%)	plant trait
HN	B79	P	0.27682393	micronutrient (%)	plant trait
HN	B79	S	0.171498872	micronutrient (%)	plant trait
HN	B79	Zn	21.13639149	micronutrient (%)	plant trait
LN	B84	CC_Aug12	14.480379975	canopy coverage (%)	plant trait
LN	B84	ExG_Aug12	0.32694435	excess green index	plant trait
LN	B84	CHL	291.9477154	chlorophyll content (µmol/m2)	plant trait
LN	B84	DW	5.490418781	leaf dry weight (g)	plant trait
LN	B84	FW	22.37565126	leaf fresh weight (g)	plant trait
LN	B84	LA	945.4540753	leaf area (m2)	plant trait
LN	B84	B	12.1723744	micronutrient (%)	plant trait
LN	B84	Ca	0.34574158	micronutrient (%)	plant trait
LN	B84	Cu	5.127553566	micronutrient (%)	plant trait
LN	B84	Fe	66.03873938	micronutrient (%)	plant trait
LN	B84	K	2.344284284	micronutrient (%)	plant trait
LN	B84	Mg	0.151223345	micronutrient (%)	plant trait
LN	B84	Mn	48.84924218	micronutrient (%)	plant trait
LN	B84	N	1.917068966	micronutrient (%)	plant trait
LN	B84	S	0.146292662	micronutrient (%)	plant trait
LN	B84	Zn	21.82131098	micronutrient (%)	plant trait
HN	B84	CC_Aug12	14.9323603155	canopy coverage (%)	plant trait
HN	B84	ExG_Aug12	0.34777009999999997	excess green index	plant trait
HN	B84	CHL	426.3990712	chlorophyll content (µmol/m2)	plant trait
HN	B84	FW	30.04060511	leaf fresh weight (g)	plant trait
HN	B84	LA	1154.448756	leaf area (m2)	plant trait
HN	B84	B	16.56609994	micronutrient (%)	plant trait
HN	B84	Ca	0.420833547	micronutrient (%)	plant trait
HN	B84	Cu	8.294683097	micronutrient (%)	plant trait
HN	B84	Fe	92.13404852	micronutrient (%)	plant trait
HN	B84	K	2.345237227	micronutrient (%)	plant trait
HN	B84	Mg	0.216319716	micronutrient (%)	plant trait
HN	B84	Mn	59.60340759	micronutrient (%)	plant trait
HN	B84	N	2.724098966	micronutrient (%)	plant trait
HN	B84	P	0.27682393	micronutrient (%)	plant trait
HN	B84	S	0.171498872	micronutrient (%)	plant trait
HN	B84	Zn	23.54316311	micronutrient (%)	plant trait
LN	B97	CC_Aug12	64.378823315	canopy coverage (%)	plant trait
LN	B97	ExG_Aug12	0.32556395000000005	excess green index	plant trait
LN	B97	CHL	227.7307736	chlorophyll content (µmol/m2)	plant trait
LN	B97	DW	5.679701193	leaf dry weight (g)	plant trait
LN	B97	FW	21.81268391	leaf fresh weight (g)	plant trait
LN	B97	LA	1048.553549	leaf area (m2)	plant trait
LN	B97	B	15.46975366	micronutrient (%)	plant trait
LN	B97	Ca	0.257607934	micronutrient (%)	plant trait
LN	B97	Cu	5.487184481	micronutrient (%)	plant trait
LN	B97	Fe	64.57917427	micronutrient (%)	plant trait
LN	B97	K	2.103025906	micronutrient (%)	plant trait
LN	B97	Mg	0.131003135	micronutrient (%)	plant trait
LN	B97	Mn	41.35361171	micronutrient (%)	plant trait
LN	B97	N	1.665372036	micronutrient (%)	plant trait
LN	B97	P	0.265088008	micronutrient (%)	plant trait
LN	B97	S	0.117083008	micronutrient (%)	plant trait
LN	B97	Zn	17.28326996	micronutrient (%)	plant trait
HN	B97	CC_Aug12	75.02751538	canopy coverage (%)	plant trait
HN	B97	ExG_Aug12	0.3622704	excess green index	plant trait
HN	B97	CHL	402.6819048	chlorophyll content (µmol/m2)	plant trait
HN	B97	DW	7.94918586	leaf dry weight (g)	plant trait
HN	B97	FW	31.85410414	leaf fresh weight (g)	plant trait
HN	B97	LA	1353.662251	leaf area (m2)	plant trait
HN	B97	B	17.2936558	micronutrient (%)	plant trait
HN	B97	Ca	0.343187645	micronutrient (%)	plant trait
HN	B97	Cu	10.42846372	micronutrient (%)	plant trait
HN	B97	Fe	89.80321565	micronutrient (%)	plant trait
HN	B97	K	2.194419434	micronutrient (%)	plant trait
HN	B97	Mg	0.219903723	micronutrient (%)	plant trait
HN	B97	Mn	56.56430444	micronutrient (%)	plant trait
HN	B97	N	2.683165114	micronutrient (%)	plant trait
HN	B97	P	0.271255947	micronutrient (%)	plant trait
HN	B97	S	0.174134837	micronutrient (%)	plant trait
HN	B97	Zn	24.74654892	micronutrient (%)	plant trait
LN	C103	CC_Aug12	68.39074457	canopy coverage (%)	plant trait
LN	C103	ExG_Aug12	0.3464973	excess green index	plant trait
LN	C103	CHL	269.5417135	chlorophyll content (µmol/m2)	plant trait
LN	C103	DW	6.613059294	leaf dry weight (g)	plant trait
LN	C103	FW	28.29205346	leaf fresh weight (g)	plant trait
LN	C103	LA	1199.411043	leaf area (m2)	plant trait
LN	C103	Ca	0.23078465	micronutrient (%)	plant trait
LN	C103	Cu	5.127553566	micronutrient (%)	plant trait
LN	C103	Fe	70.41743472	micronutrient (%)	plant trait
LN	C103	K	2.375752768	micronutrient (%)	plant trait
LN	C103	Mg	0.122915052	micronutrient (%)	plant trait
LN	C103	Mn	45.10142695	micronutrient (%)	plant trait
LN	C103	N	1.76791523	micronutrient (%)	plant trait
LN	C103	P	0.286767965	micronutrient (%)	plant trait
LN	C103	S	0.126819559	micronutrient (%)	plant trait
LN	C103	Zn	13.8797392	micronutrient (%)	plant trait
HN	C103	CC_Aug12	54.618344545	canopy coverage (%)	plant trait
HN	C103	ExG_Aug12	0.35372554551801705	excess green index	plant trait
HN	C103	CHL	381.9255289	chlorophyll content (µmol/m2)	plant trait
HN	C103	DW	8.518773291	leaf dry weight (g)	plant trait
HN	C103	FW	37.88971846	leaf fresh weight (g)	plant trait
HN	C103	LA	1381.673677	leaf area (m2)	plant trait
HN	C103	B	17.2936558	micronutrient (%)	plant trait
HN	C103	Ca	0.372304858	micronutrient (%)	plant trait
HN	C103	Cu	9.36157341	micronutrient (%)	plant trait
HN	C103	Fe	109.5093481	micronutrient (%)	plant trait
HN	C103	K	2.50862317	micronutrient (%)	plant trait
HN	C103	Mg	0.144639566	micronutrient (%)	plant trait
HN	C103	Mn	59.22351969	micronutrient (%)	plant trait
HN	C103	N	2.731541485	micronutrient (%)	plant trait
HN	C103	P	0.296311872	micronutrient (%)	plant trait
HN	C103	S	0.182042732	micronutrient (%)	plant trait
HN	C103	Zn	22.7409059	micronutrient (%)	plant trait
LN	C123	CC_Aug12	1.4298020025	canopy coverage (%)	plant trait
LN	C123	ExG_Aug12	0.31531945	excess green index	plant trait
LN	C123	CHL	288.919286	chlorophyll content (µmol/m2)	plant trait
LN	C123	DW	5.926323033	leaf dry weight (g)	plant trait
LN	C123	FW	23.35452626	leaf fresh weight (g)	plant trait
LN	C123	LA	1084.935592	leaf area (m2)	plant trait
LN	C123	B	12.91987737	micronutrient (%)	plant trait
LN	C123	Ca	0.262334318	micronutrient (%)	plant trait
LN	C123	Cu	6.745094169	micronutrient (%)	plant trait
LN	C123	Fe	79.67961732	micronutrient (%)	plant trait
LN	C123	K	2.171708274	micronutrient (%)	plant trait
LN	C123	Mg	0.11579041	micronutrient (%)	plant trait
LN	C123	Mn	51.13007881	micronutrient (%)	plant trait
LN	C123	N	2.020855014	micronutrient (%)	plant trait
LN	C123	P	0.30242996	micronutrient (%)	plant trait
LN	C123	S	0.146501433	micronutrient (%)	plant trait
LN	C123	Zn	19.4321224	micronutrient (%)	plant trait
HN	C123	CC_Aug12	8.3938891825	canopy coverage (%)	plant trait
HN	C123	ExG_Aug12	0.333810233805653	excess green index	plant trait
HN	C123	CHL	395.4958192	chlorophyll content (µmol/m2)	plant trait
HN	C123	DW	6.956059056	leaf dry weight (g)	plant trait
HN	C123	FW	27.82097879	leaf fresh weight (g)	plant trait
HN	C123	LA	1094.956618	leaf area (m2)	plant trait
HN	C123	B	16.20232201	micronutrient (%)	plant trait
HN	C123	Ca	0.294658955	micronutrient (%)	plant trait
HN	C123	Cu	9.36157341	micronutrient (%)	plant trait
HN	C123	Fe	104.2120007	micronutrient (%)	plant trait
HN	C123	K	2.332669078	micronutrient (%)	plant trait
HN	C123	Mg	0.151807581	micronutrient (%)	plant trait
HN	C123	N	2.722238336	micronutrient (%)	plant trait
HN	C123	P	0.34363973	micronutrient (%)	plant trait
HN	C123	S	0.179406767	micronutrient (%)	plant trait
HN	C123	Zn	34.77476398	micronutrient (%)	plant trait
LN	C49A	CC_Aug12	18.08066818	canopy coverage (%)	plant trait
LN	C49A	ExG_Aug12	0.26195900000000005	excess green index	plant trait
LN	C49A	CHL	317.2673717	chlorophyll content (µmol/m2)	plant trait
LN	C49A	DW	4.289454512	leaf dry weight (g)	plant trait
LN	C49A	FW	15.24240037	leaf fresh weight (g)	plant trait
LN	C49A	LA	757.0139454	leaf area (m2)	plant trait
LN	C49A	B	17.86784767	micronutrient (%)	plant trait
LN	C49A	Ca	0.468362305	micronutrient (%)	plant trait
LN	C49A	Cu	10.16238637	micronutrient (%)	plant trait
LN	C49A	Fe	76.49895602	micronutrient (%)	plant trait
LN	C49A	K	2.204424355	micronutrient (%)	plant trait
LN	C49A	Mg	0.24828035	micronutrient (%)	plant trait
LN	C49A	Mn	57.59414439	micronutrient (%)	plant trait
LN	C49A	N	2.122155354	micronutrient (%)	plant trait
LN	C49A	P	0.373487796	micronutrient (%)	plant trait
LN	C49A	S	0.191729903	micronutrient (%)	plant trait
LN	C49A	Zn	36.56994428	micronutrient (%)	plant trait
HN	C49A	CC_Aug12	18.85144467	canopy coverage (%)	plant trait
HN	C49A	ExG_Aug12	0.2844725847084385	excess green index	plant trait
HN	C49A	CHL	423.8083794	chlorophyll content (µmol/m2)	plant trait
HN	C49A	DW	4.889479016	leaf dry weight (g)	plant trait
HN	C49A	FW	17.12093235	leaf fresh weight (g)	plant trait
HN	C49A	LA	804.3737828	leaf area (m2)	plant trait
HN	C49A	B	28.20699373	micronutrient (%)	plant trait
HN	C49A	Ca	0.540537647	micronutrient (%)	plant trait
HN	C49A	Cu	15.05165508	micronutrient (%)	plant trait
HN	C49A	Fe	101.0335922	micronutrient (%)	plant trait
HN	C49A	K	2.018465342	micronutrient (%)	plant trait
HN	C49A	N	2.889695005	micronutrient (%)	plant trait
HN	C49A	P	0.335287755	micronutrient (%)	plant trait
HN	C49A	S	0.211038349	micronutrient (%)	plant trait
LN	CH701-30	CC_Aug12	35.66942012	canopy coverage (%)	plant trait
LN	CH701-30	ExG_Aug12	0.31518245	excess green index	plant trait
LN	CH701-30	CHL	232.363484	chlorophyll content (µmol/m2)	plant trait
LN	CH701-30	DW	4.537479741	leaf dry weight (g)	plant trait
LN	CH701-30	FW	18.13066764	leaf fresh weight (g)	plant trait
LN	CH701-30	LA	884.8325026	leaf area (m2)	plant trait
LN	CH701-30	B	13.67118315	micronutrient (%)	plant trait
LN	CH701-30	Ca	0.203961366	micronutrient (%)	plant trait
LN	CH701-30	Fe	68.4713479	micronutrient (%)	plant trait
LN	CH701-30	K	2.571556669	micronutrient (%)	plant trait
LN	CH701-30	Mg	0.102694842	micronutrient (%)	plant trait
LN	CH701-30	Mn	39.27149214	micronutrient (%)	plant trait
LN	CH701-30	N	1.961348982	micronutrient (%)	plant trait
LN	CH701-30	P	0.351807838	micronutrient (%)	plant trait
LN	CH701-30	S	0.146292662	micronutrient (%)	plant trait
LN	CH701-30	Zn	19.55229047	micronutrient (%)	plant trait
HN	CH701-30	CC_Aug12	38.173342129999995	canopy coverage (%)	plant trait
HN	CH701-30	ExG_Aug12	0.32711835	excess green index	plant trait
HN	CH701-30	CHL	459.8313318	chlorophyll content (µmol/m2)	plant trait
HN	CH701-30	DW	7.551204898	leaf dry weight (g)	plant trait
HN	CH701-30	FW	31.96669388	leaf fresh weight (g)	plant trait
HN	CH701-30	LA	1261.995909	leaf area (m2)	plant trait
HN	CH701-30	B	16.20232201	micronutrient (%)	plant trait
HN	CH701-30	Ca	0.427304039	micronutrient (%)	plant trait
HN	CH701-30	Cu	14.34039487	micronutrient (%)	plant trait
HN	CH701-30	Fe	111.840181	micronutrient (%)	plant trait
HN	CH701-30	K	2.470918722	micronutrient (%)	plant trait
HN	CH701-30	Mg	0.169727618	micronutrient (%)	plant trait
HN	CH701-30	Mn	85.81567222	micronutrient (%)	plant trait
HN	CH701-30	N	3.094364266	micronutrient (%)	plant trait
HN	CH701-30	P	0.338071747	micronutrient (%)	plant trait
HN	CH701-30	S	0.211038349	micronutrient (%)	plant trait
HN	CH701-30	Zn	22.3397773	micronutrient (%)	plant trait
LN	CH9	CC_Aug12	54.75440302	canopy coverage (%)	plant trait
LN	CH9	ExG_Aug12	0.36294265000000003	excess green index	plant trait
LN	CH9	CHL	353.0179106	chlorophyll content (µmol/m2)	plant trait
LN	CH9	DW	6.097427896	leaf dry weight (g)	plant trait
LN	CH9	FW	24.30232834	leaf fresh weight (g)	plant trait
LN	CH9	LA	1078.661293	leaf area (m2)	plant trait
LN	CH9	B	14.87023016	micronutrient (%)	plant trait
LN	CH9	Ca	0.284431217	micronutrient (%)	plant trait
LN	CH9	Cu	9.443124542	micronutrient (%)	plant trait
LN	CH9	Fe	76.98547772	micronutrient (%)	plant trait
LN	CH9	K	2.641486634	micronutrient (%)	plant trait
LN	CH9	Mg	0.122915052	micronutrient (%)	plant trait
LN	CH9	Mn	71.75255749	micronutrient (%)	plant trait
LN	CH9	N	2.1174943	micronutrient (%)	plant trait
LN	CH9	P	0.286767965	micronutrient (%)	plant trait
LN	CH9	S	0.159274731	micronutrient (%)	plant trait
HN	CH9	CC_Aug12	62.835532044999994	canopy coverage (%)	plant trait
HN	CH9	ExG_Aug12	0.38974692412608747	excess green index	plant trait
HN	CH9	CHL	418.90457	chlorophyll content (µmol/m2)	plant trait
HN	CH9	DW	5.437159239	leaf dry weight (g)	plant trait
HN	CH9	FW	22.58153478	leaf fresh weight (g)	plant trait
HN	CH9	LA	1052.064019	leaf area (m2)	plant trait
HN	CH9	B	15.11098821	micronutrient (%)	plant trait
HN	CH9	Ca	0.317305677	micronutrient (%)	plant trait
HN	CH9	Cu	11.13972393	micronutrient (%)	plant trait
HN	CH9	Fe	93.19351801	micronutrient (%)	plant trait
HN	CH9	K	2.681435225	micronutrient (%)	plant trait
HN	CH9	Mg	0.187647656	micronutrient (%)	plant trait
HN	CH9	Mn	70.62015649	micronutrient (%)	plant trait
HN	CH9	N	2.80596667	micronutrient (%)	plant trait
HN	CH9	P	0.282391914	micronutrient (%)	plant trait
HN	CH9	S	0.171498872	micronutrient (%)	plant trait
HN	CH9	Zn	27.15332053	micronutrient (%)	plant trait
LN	CI187-2	CC_Aug12	53.70736326	canopy coverage (%)	plant trait
LN	CI187-2	ExG_Aug12	0.33218084999999997	excess green index	plant trait
LN	CI187-2	CHL	253.5699928	chlorophyll content (µmol/m2)	plant trait
LN	CI187-2	DW	5.311677804	leaf dry weight (g)	plant trait
LN	CI187-2	FW	21.74696786	leaf fresh weight (g)	plant trait
LN	CI187-2	LA	996.0415114	leaf area (m2)	plant trait
LN	CI187-2	B	12.42862408	micronutrient (%)	plant trait
LN	CI187-2	Ca	0.243696993	micronutrient (%)	plant trait
LN	CI187-2	Cu	5.33807928	micronutrient (%)	plant trait
LN	CI187-2	Fe	71.06740828	micronutrient (%)	plant trait
LN	CI187-2	K	2.311790106	micronutrient (%)	plant trait
LN	CI187-2	Mg	0.093258821	micronutrient (%)	plant trait
LN	CI187-2	Mn	37.79038083	micronutrient (%)	plant trait
LN	CI187-2	N	1.911778898	micronutrient (%)	plant trait
LN	CI187-2	P	0.297614377	micronutrient (%)	plant trait
LN	CI187-2	S	0.137716171	micronutrient (%)	plant trait
LN	CI187-2	Zn	19.73606015	micronutrient (%)	plant trait
HN	CI187-2	CC_Aug12	50.827147679999996	canopy coverage (%)	plant trait
HN	CI187-2	ExG_Aug12	0.382174	excess green index	plant trait
HN	CI187-2	CHL	411.5246349	chlorophyll content (µmol/m2)	plant trait
HN	CI187-2	DW	5.746502897	leaf dry weight (g)	plant trait
HN	CI187-2	FW	23.69457706	leaf fresh weight (g)	plant trait
HN	CI187-2	LA	1024.664543	leaf area (m2)	plant trait
HN	CI187-2	B	16.20501514	micronutrient (%)	plant trait
HN	CI187-2	Ca	0.363933765	micronutrient (%)	plant trait
HN	CI187-2	Cu	12.88345183	micronutrient (%)	plant trait
HN	CI187-2	Fe	106.957647	micronutrient (%)	plant trait
HN	CI187-2	K	2.366070829	micronutrient (%)	plant trait
HN	CI187-2	Mg	0.152722979	micronutrient (%)	plant trait
HN	CI187-2	Mn	55.58177136	micronutrient (%)	plant trait
HN	CI187-2	N	2.888614821	micronutrient (%)	plant trait
HN	CI187-2	P	0.303457492	micronutrient (%)	plant trait
HN	CI187-2	S	0.189666724	micronutrient (%)	plant trait
HN	CI187-2	Zn	28.65005266	micronutrient (%)	plant trait
LN	CI31A	CC_Aug12	72.484821445	canopy coverage (%)	plant trait
LN	CI31A	ExG_Aug12	0.32882144999999996	excess green index	plant trait
LN	CI31A	CHL	222.4859503	chlorophyll content (µmol/m2)	plant trait
LN	CI31A	DW	4.754562433	leaf dry weight (g)	plant trait
LN	CI31A	FW	20.44578496	leaf fresh weight (g)	plant trait
LN	CI31A	LA	944.5616826	leaf area (m2)	plant trait
LN	CI31A	B	11.14436796	micronutrient (%)	plant trait
LN	CI31A	Ca	0.249909435	micronutrient (%)	plant trait
LN	CI31A	Cu	4.776479848	micronutrient (%)	plant trait
LN	CI31A	Fe	65.92405916	micronutrient (%)	plant trait
LN	CI31A	K	2.311790106	micronutrient (%)	plant trait
LN	CI31A	Mg	0.12041846	micronutrient (%)	plant trait
LN	CI31A	Mn	43.49896177	micronutrient (%)	plant trait
LN	CI31A	N	1.81757902	micronutrient (%)	plant trait
LN	CI31A	P	0.291267789	micronutrient (%)	plant trait
LN	CI31A	S	0.128106206	micronutrient (%)	plant trait
LN	CI31A	Zn	25.20947125	micronutrient (%)	plant trait
HN	CI31A	CC_Aug12	75.62235856	canopy coverage (%)	plant trait
HN	CI31A	ExG_Aug12	0.3721651797501325	excess green index	plant trait
HN	CI31A	CHL	407.6448238	chlorophyll content (µmol/m2)	plant trait
HN	CI31A	DW	6.954215364	leaf dry weight (g)	plant trait
HN	CI31A	FW	33.07648048	leaf fresh weight (g)	plant trait
HN	CI31A	LA	1195.521783	leaf area (m2)	plant trait
HN	CI31A	B	13.34612397	micronutrient (%)	plant trait
HN	CI31A	Ca	0.435671317	micronutrient (%)	plant trait
HN	CI31A	Cu	9.572029862	micronutrient (%)	plant trait
HN	CI31A	Fe	101.042624	micronutrient (%)	plant trait
HN	CI31A	K	2.860882558	micronutrient (%)	plant trait
HN	CI31A	Mg	0.214169563	micronutrient (%)	plant trait
HN	CI31A	Mn	78.24840196	micronutrient (%)	plant trait
HN	CI31A	N	2.792604391	micronutrient (%)	plant trait
HN	CI31A	P	0.272592876	micronutrient (%)	plant trait
HN	CI31A	S	0.186087212	micronutrient (%)	plant trait
HN	CI31A	Zn	23.291592	micronutrient (%)	plant trait
HN	CI3A	CC_Aug12	61.1101536	canopy coverage (%)	plant trait
HN	CI3A	ExG_Aug12	0.3345688	excess green index	plant trait
HN	CI3A	CHL	406.8455166	chlorophyll content (µmol/m2)	plant trait
HN	CI3A	DW	7.153223936	leaf dry weight (g)	plant trait
HN	CI3A	FW	31.12629189	leaf fresh weight (g)	plant trait
HN	CI3A	LA	1212.095973	leaf area (m2)	plant trait
HN	CI3A	B	17.2936558	micronutrient (%)	plant trait
HN	CI3A	Ca	0.404657318	micronutrient (%)	plant trait
HN	CI3A	Cu	11.13972393	micronutrient (%)	plant trait
HN	CI3A	Fe	97.64328986	micronutrient (%)	plant trait
HN	CI3A	K	2.320100929	micronutrient (%)	plant trait
HN	CI3A	Mg	0.230655745	micronutrient (%)	plant trait
HN	CI3A	Mn	68.72071703	micronutrient (%)	plant trait
HN	CI3A	N	2.863646189	micronutrient (%)	plant trait
HN	CI3A	P	0.287959897	micronutrient (%)	plant trait
HN	CI3A	S	0.187314663	micronutrient (%)	plant trait
HN	CI3A	Zn	32.76912097	micronutrient (%)	plant trait
LN	CI64	CC_Aug12	57.55807353	canopy coverage (%)	plant trait
LN	CI64	ExG_Aug12	0.3335619	excess green index	plant trait
LN	CI64	CHL	253.1087029	chlorophyll content (µmol/m2)	plant trait
LN	CI64	DW	6.652221173	leaf dry weight (g)	plant trait
LN	CI64	FW	26.01570723	leaf fresh weight (g)	plant trait
LN	CI64	LA	1189.736928	leaf area (m2)	plant trait
LN	CI64	B	13.67118315	micronutrient (%)	plant trait
LN	CI64	Ca	0.261439831	micronutrient (%)	plant trait
LN	CI64	Cu	5.487184481	micronutrient (%)	plant trait
LN	CI64	Fe	65.79547853	micronutrient (%)	plant trait
LN	CI64	K	2.012116952	micronutrient (%)	plant trait
LN	CI64	Mg	0.131003135	micronutrient (%)	plant trait
LN	CI64	Mn	39.27149214	micronutrient (%)	plant trait
LN	CI64	N	1.746940485	micronutrient (%)	plant trait
LN	CI64	P	0.274723544	micronutrient (%)	plant trait
LN	CI64	S	0.130065077	micronutrient (%)	plant trait
LN	CI64	Zn	13.12339903	micronutrient (%)	plant trait
HN	CI64	CC_Aug12	66.32043981	canopy coverage (%)	plant trait
HN	CI64	ExG_Aug12	0.3451946	excess green index	plant trait
HN	CI64	CHL	335.9715913	chlorophyll content (µmol/m2)	plant trait
HN	CI64	DW	6.886686228	leaf dry weight (g)	plant trait
HN	CI64	FW	27.96975809	leaf fresh weight (g)	plant trait
HN	CI64	LA	1247.498058	leaf area (m2)	plant trait
HN	CI64	B	12.5645427	micronutrient (%)	plant trait
HN	CI64	Ca	0.339952399	micronutrient (%)	plant trait
HN	CI64	Fe	87.04859498	micronutrient (%)	plant trait
HN	CI64	K	2.090732201	micronutrient (%)	plant trait
HN	CI64	Mg	0.212735708	micronutrient (%)	plant trait
HN	CI64	Mn	65.68161388	micronutrient (%)	plant trait
HN	CI64	P	0.24341603	micronutrient (%)	plant trait
HN	CI64	S	0.158319046	micronutrient (%)	plant trait
LN	CI7	CHL	318.4928803	chlorophyll content (µmol/m2)	plant trait
LN	CI7	DW	6.261196175	leaf dry weight (g)	plant trait
LN	CI7	FW	25.72041483	leaf fresh weight (g)	plant trait
LN	CI7	LA	1151.736349	leaf area (m2)	plant trait
LN	CI7	B	13.28479482	micronutrient (%)	plant trait
LN	CI7	Ca	0.442495129	micronutrient (%)	plant trait
LN	CI7	Cu	9.269275305	micronutrient (%)	plant trait
LN	CI7	Fe	76.2107574	micronutrient (%)	plant trait
LN	CI7	K	2.12899483	micronutrient (%)	plant trait
LN	CI7	Mg	0.222267109	micronutrient (%)	plant trait
LN	CI7	Mn	67.76043077	micronutrient (%)	plant trait
LN	CI7	N	2.048520657	micronutrient (%)	plant trait
LN	CI7	P	0.278574613	micronutrient (%)	plant trait
LN	CI7	S	0.190570978	micronutrient (%)	plant trait
LN	CI7	Zn	27.64209841	micronutrient (%)	plant trait
HN	CI7	CHL	430.4777351	chlorophyll content (µmol/m2)	plant trait
HN	CI7	DW	8.714024958	leaf dry weight (g)	plant trait
HN	CI7	FW	32.02732139	leaf fresh weight (g)	plant trait
HN	CI7	LA	1515.653111	leaf area (m2)	plant trait
HN	CI7	B	12.77434574	micronutrient (%)	plant trait
HN	CI7	Ca	0.445236324	micronutrient (%)	plant trait
HN	CI7	Cu	12.33154817	micronutrient (%)	plant trait
HN	CI7	Fe	102.9246767	micronutrient (%)	plant trait
HN	CI7	K	2.269857437	micronutrient (%)	plant trait
HN	CI7	Mg	0.214169563	micronutrient (%)	plant trait
HN	CI7	Mn	75.18534377	micronutrient (%)	plant trait
HN	CI7	N	2.833751718	micronutrient (%)	plant trait
HN	CI7	P	0.288025184	micronutrient (%)	plant trait
HN	CI7	S	0.193246236	micronutrient (%)	plant trait
HN	CI7	Zn	35.34812848	micronutrient (%)	plant trait
LN	CI90C	CHL	279.8269133	chlorophyll content (µmol/m2)	plant trait
LN	CI90C	DW	5.128171406	leaf dry weight (g)	plant trait
LN	CI90C	FW	22.35467111	leaf fresh weight (g)	plant trait
LN	CI90C	LA	1013.978195	leaf area (m2)	plant trait
LN	CI90C	B	14.5704684	micronutrient (%)	plant trait
LN	CI90C	Ca	0.414715738	micronutrient (%)	plant trait
LN	CI90C	Cu	7.285339054	micronutrient (%)	plant trait
LN	CI90C	Fe	76.25569516	micronutrient (%)	plant trait
LN	CI90C	K	2.200927856	micronutrient (%)	plant trait
LN	CI90C	Mg	0.228060141	micronutrient (%)	plant trait
LN	CI90C	N	2.066222703	micronutrient (%)	plant trait
LN	CI90C	P	0.344581186	micronutrient (%)	plant trait
LN	CI90C	S	0.169011283	micronutrient (%)	plant trait
HN	CI90C	CHL	401.880024	chlorophyll content (µmol/m2)	plant trait
HN	CI90C	DW	6.64570693	leaf dry weight (g)	plant trait
HN	CI90C	FW	31.84204096	leaf fresh weight (g)	plant trait
HN	CI90C	LA	1245.000611	leaf area (m2)	plant trait
HN	CI90C	B	14.74721028	micronutrient (%)	plant trait
HN	CI90C	Ca	0.51465568	micronutrient (%)	plant trait
HN	CI90C	Fe	101.2454861	micronutrient (%)	plant trait
HN	CI90C	K	2.489770946	micronutrient (%)	plant trait
HN	CI90C	Mg	0.331007955	micronutrient (%)	plant trait
HN	CI90C	Mn	66.82127756	micronutrient (%)	plant trait
HN	CI90C	N	2.820851708	micronutrient (%)	plant trait
HN	CI90C	P	0.315799814	micronutrient (%)	plant trait
HN	CI90C	S	0.176770802	micronutrient (%)	plant trait
HN	CI90C	Zn	34.77476398	micronutrient (%)	plant trait
LN	CM105	CC_Aug12	40.397450495	canopy coverage (%)	plant trait
LN	CM105	ExG_Aug12	0.34055265	excess green index	plant trait
LN	CM105	CHL	322.1331745	chlorophyll content (µmol/m2)	plant trait
LN	CM105	DW	4.295981491	leaf dry weight (g)	plant trait
LN	CM105	FW	16.28791116	leaf fresh weight (g)	plant trait
LN	CM105	LA	818.3720163	leaf area (m2)	plant trait
LN	CM105	B	17.86784767	micronutrient (%)	plant trait
LN	CM105	Fe	79.66134709	micronutrient (%)	plant trait
LN	CM105	K	1.756872581	micronutrient (%)	plant trait
LN	CM105	Mg	0.187619722	micronutrient (%)	plant trait
LN	CM105	N	2.243342765	micronutrient (%)	plant trait
LN	CM105	P	0.284359081	micronutrient (%)	plant trait
LN	CM105	Zn	25.60301182	micronutrient (%)	plant trait
HN	CM105	CC_Aug12	32.6743889	canopy coverage (%)	plant trait
HN	CM105	ExG_Aug12	0.3349438355797455	excess green index	plant trait
HN	CM105	CHL	438.7665403	chlorophyll content (µmol/m2)	plant trait
HN	CM105	DW	4.966154247	leaf dry weight (g)	plant trait
HN	CM105	FW	17.94122904	leaf fresh weight (g)	plant trait
HN	CM105	LA	885.5810581	leaf area (m2)	plant trait
HN	CM105	Ca	0.443480269	micronutrient (%)	plant trait
HN	CM105	Cu	12.20661424	micronutrient (%)	plant trait
HN	CM105	Fe	102.3049556	micronutrient (%)	plant trait
HN	CM105	K	1.795380689	micronutrient (%)	plant trait
HN	CM105	Mg	0.241407768	micronutrient (%)	plant trait
HN	CM105	Mn	47.06710711	micronutrient (%)	plant trait
HN	CM105	N	2.908301301	micronutrient (%)	plant trait
HN	CM105	P	0.29352788	micronutrient (%)	plant trait
HN	CM105	S	0.195222558	micronutrient (%)	plant trait
HN	CM105	Zn	33.57137818	micronutrient (%)	plant trait
LN	CM174	CC_Aug12	50.389110200000005	canopy coverage (%)	plant trait
LN	CM174	ExG_Aug12	0.34502325	excess green index	plant trait
HN	CM174	CC_Aug12	56.537827495	canopy coverage (%)	plant trait
HN	CM174	ExG_Aug12	0.3571107687198255	excess green index	plant trait
LN	CM37	CC_Aug12	48.74720461	canopy coverage (%)	plant trait
LN	CM37	ExG_Aug12	0.31392264999999997	excess green index	plant trait
LN	CM37	CHL	340.6348796	chlorophyll content (µmol/m2)	plant trait
LN	CM37	DW	5.578533008	leaf dry weight (g)	plant trait
LN	CM37	FW	21.1098489	leaf fresh weight (g)	plant trait
LN	CM37	LA	992.2174297	leaf area (m2)	plant trait
LN	CM37	B	20.86546518	micronutrient (%)	plant trait
LN	CM37	Ca	0.456866612	micronutrient (%)	plant trait
LN	CM37	Cu	7.644969969	micronutrient (%)	plant trait
LN	CM37	Fe	75.52591261	micronutrient (%)	plant trait
LN	CM37	K	1.704425107	micronutrient (%)	plant trait
LN	CM37	Mg	0.211883973	micronutrient (%)	plant trait
LN	CM37	N	2.014951106	micronutrient (%)	plant trait
LN	CM37	P	0.277132428	micronutrient (%)	plant trait
LN	CM37	S	0.175502317	micronutrient (%)	plant trait
LN	CM37	Zn	20.68680072	micronutrient (%)	plant trait
HN	CM37	CC_Aug12	42.848131455	canopy coverage (%)	plant trait
HN	CM37	ExG_Aug12	0.29995140285466904	excess green index	plant trait
HN	CM37	CHL	446.7236651	chlorophyll content (µmol/m2)	plant trait
HN	CM37	DW	5.919117835	leaf dry weight (g)	plant trait
HN	CM37	FW	23.04395693	leaf fresh weight (g)	plant trait
HN	CM37	LA	957.4393651	leaf area (m2)	plant trait
HN	CM37	B	25.29677028	micronutrient (%)	plant trait
HN	CM37	Ca	0.521126172	micronutrient (%)	plant trait
HN	CM37	Cu	12.91787445	micronutrient (%)	plant trait
HN	CM37	Fe	98.27897155	micronutrient (%)	plant trait
HN	CM37	K	1.804806801	micronutrient (%)	plant trait
HN	CM37	Mg	0.241407768	micronutrient (%)	plant trait
HN	CM37	N	2.828294226	micronutrient (%)	plant trait
HN	CM37	P	0.318583805	micronutrient (%)	plant trait
HN	CM37	S	0.189950628	micronutrient (%)	plant trait
HN	CM37	Zn	25.54880612	micronutrient (%)	plant trait
LN	CM7	CC_Aug12	42.368343525	canopy coverage (%)	plant trait
LN	CM7	ExG_Aug12	0.31734615	excess green index	plant trait
LN	CM7	CHL	331.5734146	chlorophyll content (µmol/m2)	plant trait
LN	CM7	DW	6.090900916	leaf dry weight (g)	plant trait
LN	CM7	FW	23.41067198	leaf fresh weight (g)	plant trait
LN	CM7	LA	1020.014672	leaf area (m2)	plant trait
LN	CM7	B	20.56570343	micronutrient (%)	plant trait
LN	CM7	Ca	0.464530407	micronutrient (%)	plant trait
LN	CM7	Cu	8.364231798	micronutrient (%)	plant trait
LN	CM7	Fe	75.76917346	micronutrient (%)	plant trait
LN	CM7	K	1.753376082	micronutrient (%)	plant trait
LN	CM7	Mg	0.215928015	micronutrient (%)	plant trait
LN	CM7	N	2.070883757	micronutrient (%)	plant trait
LN	CM7	P	0.291585734	micronutrient (%)	plant trait
LN	CM7	S	0.1722568	micronutrient (%)	plant trait
LN	CM7	Zn	24.09033149	micronutrient (%)	plant trait
HN	CM7	CC_Aug12	44.56707351	canopy coverage (%)	plant trait
HN	CM7	ExG_Aug12	0.310939155803578	excess green index	plant trait
HN	CM7	CHL	426.7074869	chlorophyll content (µmol/m2)	plant trait
HN	CM7	DW	5.334925597	leaf dry weight (g)	plant trait
HN	CM7	FW	20.12868686	leaf fresh weight (g)	plant trait
HN	CM7	LA	872.8461977	leaf area (m2)	plant trait
HN	CM7	B	27.47943787	micronutrient (%)	plant trait
HN	CM7	Ca	0.501714696	micronutrient (%)	plant trait
HN	CM7	Cu	11.85098414	micronutrient (%)	plant trait
HN	CM7	Fe	95.73624478	micronutrient (%)	plant trait
HN	CM7	K	1.886499773	micronutrient (%)	plant trait
HN	CM7	Mg	0.244991775	micronutrient (%)	plant trait
HN	CM7	N	2.951095783	micronutrient (%)	plant trait
HN	CM7	P	0.313015822	micronutrient (%)	plant trait
HN	CM7	S	0.187314663	micronutrient (%)	plant trait
HN	CM7	Zn	30.36234935	micronutrient (%)	plant trait
HN	CML10	CC_Aug12	64.38271844	canopy coverage (%)	plant trait
HN	CML10	ExG_Aug12	0.3748223	excess green index	plant trait
HN	CML10	CHL	361.9710339	chlorophyll content (µmol/m2)	plant trait
HN	CML10	DW	6.598241311	leaf dry weight (g)	plant trait
HN	CML10	FW	26.92830298	leaf fresh weight (g)	plant trait
HN	CML10	LA	1148.833889	leaf area (m2)	plant trait
HN	CML10	B	21.65899097	micronutrient (%)	plant trait
HN	CML10	Cu	11.13972393	micronutrient (%)	plant trait
HN	CML10	Fe	93.19351801	micronutrient (%)	plant trait
HN	CML10	K	2.159857023	micronutrient (%)	plant trait
HN	CML10	Mg	0.248575783	micronutrient (%)	plant trait
HN	CML10	Mn	75.938587	micronutrient (%)	plant trait
HN	CML10	N	2.776196596	micronutrient (%)	plant trait
HN	CML10	P	0.290743889	micronutrient (%)	plant trait
HN	CML10	S	0.176770802	micronutrient (%)	plant trait
HN	CML10	Zn	24.74654892	micronutrient (%)	plant trait
LN	CML103	CC_Aug12	60.59043518	canopy coverage (%)	plant trait
LN	CML103	ExG_Aug12	0.3250596	excess green index	plant trait
LN	CML103	CHL	231.0814761	chlorophyll content (µmol/m2)	plant trait
LN	CML103	DW	6.015840649	leaf dry weight (g)	plant trait
LN	CML103	FW	22.45607517	leaf fresh weight (g)	plant trait
LN	CML103	LA	1111.471242	leaf area (m2)	plant trait
LN	CML103	B	15.46975366	micronutrient (%)	plant trait
LN	CML103	Ca	0.303590706	micronutrient (%)	plant trait
LN	CML103	Cu	5.487184481	micronutrient (%)	plant trait
LN	CML103	Fe	64.82243512	micronutrient (%)	plant trait
LN	CML103	K	1.791837563	micronutrient (%)	plant trait
LN	CML103	Mg	0.155267387	micronutrient (%)	plant trait
LN	CML103	Mn	70.08686183	micronutrient (%)	plant trait
LN	CML103	N	1.777237338	micronutrient (%)	plant trait
LN	CML103	P	0.286767965	micronutrient (%)	plant trait
LN	CML103	S	0.139801628	micronutrient (%)	plant trait
LN	CML103	Zn	24.09033149	micronutrient (%)	plant trait
HN	CML103	CC_Aug12	75.35094296	canopy coverage (%)	plant trait
HN	CML103	ExG_Aug12	0.36840765	excess green index	plant trait
HN	CML103	CHL	379.1497877	chlorophyll content (µmol/m2)	plant trait
HN	CML103	DW	6.98891987	leaf dry weight (g)	plant trait
HN	CML103	FW	28.63725441	leaf fresh weight (g)	plant trait
HN	CML103	LA	1240.481211	leaf area (m2)	plant trait
HN	CML103	B	18.74876753	micronutrient (%)	plant trait
HN	CML103	Cu	11.13972393	micronutrient (%)	plant trait
HN	CML103	Fe	105.9071519	micronutrient (%)	plant trait
HN	CML103	K	2.131578687	micronutrient (%)	plant trait
HN	CML103	Mg	0.241407768	micronutrient (%)	plant trait
HN	CML103	Mn	110.8882732	micronutrient (%)	plant trait
HN	CML103	N	2.768754078	micronutrient (%)	plant trait
HN	CML103	P	0.279607922	micronutrient (%)	plant trait
HN	CML103	S	0.189950628	micronutrient (%)	plant trait
HN	CML103	Zn	31.96686376	micronutrient (%)	plant trait
LN	CML108	CC_Aug12	75.50842982	canopy coverage (%)	plant trait
LN	CML108	ExG_Aug12	0.34776589999999996	excess green index	plant trait
LN	CML108	CHL	227.5559543	chlorophyll content (µmol/m2)	plant trait
LN	CML108	DW	6.675065602	leaf dry weight (g)	plant trait
LN	CML108	FW	29.2781205	leaf fresh weight (g)	plant trait
LN	CML108	LA	1269.850194	leaf area (m2)	plant trait
LN	CML108	B	14.27070665	micronutrient (%)	plant trait
LN	CML108	Ca	0.249944138	micronutrient (%)	plant trait
LN	CML108	Cu	6.20644631	micronutrient (%)	plant trait
LN	CML108	Fe	72.85004324	micronutrient (%)	plant trait
LN	CML108	K	2.435193238	micronutrient (%)	plant trait
LN	CML108	Mg	0.143135261	micronutrient (%)	plant trait
LN	CML108	Mn	46.76712261	micronutrient (%)	plant trait
LN	CML108	N	1.993976362	micronutrient (%)	plant trait
LN	CML108	P	0.315674575	micronutrient (%)	plant trait
LN	CML108	S	0.136556111	micronutrient (%)	plant trait
LN	CML108	Zn	18.03961013	micronutrient (%)	plant trait
HN	CML108	CC_Aug12	76.24400727	canopy coverage (%)	plant trait
HN	CML108	ExG_Aug12	0.3966669	excess green index	plant trait
HN	CML108	CHL	360.0896982	chlorophyll content (µmol/m2)	plant trait
HN	CML108	LA	1472.801612	leaf area (m2)	plant trait
HN	CML108	B	14.38343235	micronutrient (%)	plant trait
HN	CML108	Ca	0.365834366	micronutrient (%)	plant trait
HN	CML108	Cu	11.85098414	micronutrient (%)	plant trait
HN	CML108	Fe	116.7137406	micronutrient (%)	plant trait
HN	CML108	K	2.291822592	micronutrient (%)	plant trait
HN	CML108	Mg	0.230655745	micronutrient (%)	plant trait
HN	CML108	Mn	66.06150177	micronutrient (%)	plant trait
HN	CML108	N	2.876670597	micronutrient (%)	plant trait
HN	CML108	P	0.338071747	micronutrient (%)	plant trait
HN	CML108	S	0.182042732	micronutrient (%)	plant trait
HN	CML108	Zn	24.34542031	micronutrient (%)	plant trait
LN	CML154Q	CC_Aug12	45.8703298	canopy coverage (%)	plant trait
LN	CML154Q	ExG_Aug12	0.33558975	excess green index	plant trait
LN	CML154Q	CHL	272.1135154	chlorophyll content (µmol/m2)	plant trait
LN	CML154Q	DW	6.493731286	leaf dry weight (g)	plant trait
LN	CML154Q	FW	27.6184213	leaf fresh weight (g)	plant trait
LN	CML154Q	LA	1122.130671	leaf area (m2)	plant trait
LN	CML154Q	B	13.71288019	micronutrient (%)	plant trait
LN	CML154Q	Ca	0.324458736	micronutrient (%)	plant trait
LN	CML154Q	Cu	5.899678713	micronutrient (%)	plant trait
LN	CML154Q	Fe	73.31762352	micronutrient (%)	plant trait
LN	CML154Q	K	2.870928597	micronutrient (%)	plant trait
LN	CML154Q	Mg	0.16115792	micronutrient (%)	plant trait
LN	CML154Q	Mn	83.45902836	micronutrient (%)	plant trait
LN	CML154Q	N	1.881391841	micronutrient (%)	plant trait
LN	CML154Q	P	0.269054731	micronutrient (%)	plant trait
LN	CML154Q	S	0.142521153	micronutrient (%)	plant trait
LN	CML154Q	Zn	21.56053052	micronutrient (%)	plant trait
HN	CML154Q	CC_Aug12	64.04953129500001	canopy coverage (%)	plant trait
HN	CML154Q	ExG_Aug12	0.371012305918628	excess green index	plant trait
HN	CML154Q	CHL	429.3628469	chlorophyll content (µmol/m2)	plant trait
HN	CML154Q	DW	8.748531029	leaf dry weight (g)	plant trait
HN	CML154Q	FW	35.78680813	leaf fresh weight (g)	plant trait
HN	CML154Q	LA	1393.064275	leaf area (m2)	plant trait
HN	CML154Q	B	13.34612397	micronutrient (%)	plant trait
HN	CML154Q	Ca	0.368716269	micronutrient (%)	plant trait
HN	CML154Q	Cu	13.98725915	micronutrient (%)	plant trait
HN	CML154Q	Fe	99.42943586	micronutrient (%)	plant trait
HN	CML154Q	K	2.343162879	micronutrient (%)	plant trait
HN	CML154Q	Mg	0.197411404	micronutrient (%)	plant trait
HN	CML154Q	Mn	84.37451833	micronutrient (%)	plant trait
HN	CML154Q	N	2.804034204	micronutrient (%)	plant trait
HN	CML154Q	P	0.284167107	micronutrient (%)	plant trait
HN	CML154Q	S	0.1825077	micronutrient (%)	plant trait
HN	CML154Q	Zn	25.97082233	micronutrient (%)	plant trait
LN	CML158Q	CC_Aug12	44.21137935	canopy coverage (%)	plant trait
LN	CML158Q	ExG_Aug12	0.346105	excess green index	plant trait
LN	CML158Q	CHL	290.9862095	chlorophyll content (µmol/m2)	plant trait
LN	CML158Q	DW	9.608942989	leaf dry weight (g)	plant trait
LN	CML158Q	FW	43.79638407	leaf fresh weight (g)	plant trait
LN	CML158Q	LA	1596.577016	leaf area (m2)	plant trait
LN	CML158Q	B	11.57285089	micronutrient (%)	plant trait
LN	CML158Q	Ca	0.272935524	micronutrient (%)	plant trait
LN	CML158Q	Cu	7.285339054	micronutrient (%)	plant trait
LN	CML158Q	Fe	67.9848262	micronutrient (%)	plant trait
LN	CML158Q	K	2.739388584	micronutrient (%)	plant trait
LN	CML158Q	Mg	0.110782926	micronutrient (%)	plant trait
LN	CML158Q	Mn	63.4240792	micronutrient (%)	plant trait
LN	CML158Q	N	1.982323726	micronutrient (%)	plant trait
LN	CML158Q	P	0.344581186	micronutrient (%)	plant trait
LN	CML158Q	S	0.156029214	micronutrient (%)	plant trait
LN	CML158Q	Zn	21.06497081	micronutrient (%)	plant trait
HN	CML158Q	CC_Aug12	57.63150905	canopy coverage (%)	plant trait
HN	CML158Q	ExG_Aug12	0.37708575	excess green index	plant trait
HN	CML158Q	CHL	370.1132081	chlorophyll content (µmol/m2)	plant trait
HN	CML158Q	DW	9.537458506	leaf dry weight (g)	plant trait
HN	CML158Q	FW	43.49105806	leaf fresh weight (g)	plant trait
HN	CML158Q	LA	1729.347765	leaf area (m2)	plant trait
HN	CML158Q	B	14.74721028	micronutrient (%)	plant trait
HN	CML158Q	Ca	0.372304858	micronutrient (%)	plant trait
HN	CML158Q	Cu	10.07283362	micronutrient (%)	plant trait
HN	CML158Q	Fe	90.22700344	micronutrient (%)	plant trait
HN	CML158Q	K	2.574605955	micronutrient (%)	plant trait
HN	CML158Q	Mg	0.198399678	micronutrient (%)	plant trait
HN	CML158Q	Mn	68.72071703	micronutrient (%)	plant trait
HN	CML158Q	N	2.729680855	micronutrient (%)	plant trait
HN	CML158Q	P	0.282391914	micronutrient (%)	plant trait
HN	CML158Q	S	0.174134837	micronutrient (%)	plant trait
HN	CML158Q	Zn	27.55444914	micronutrient (%)	plant trait
LN	CML218	CC_Aug12	85.330674675	canopy coverage (%)	plant trait
LN	CML218	ExG_Aug12	0.34136965	excess green index	plant trait
LN	CML218	CHL	219.7764972	chlorophyll content (µmol/m2)	plant trait
LN	CML218	DW	5.382723616	leaf dry weight (g)	plant trait
LN	CML218	FW	25.50519025	leaf fresh weight (g)	plant trait
LN	CML218	LA	1184.786538	leaf area (m2)	plant trait
LN	CML218	B	14.87023016	micronutrient (%)	plant trait
LN	CML218	Cu	5.127553566	micronutrient (%)	plant trait
LN	CML218	Fe	67.9848262	micronutrient (%)	plant trait
LN	CML218	K	2.295333309	micronutrient (%)	plant trait
LN	CML218	Mg	0.171443554	micronutrient (%)	plant trait
LN	CML218	Mn	46.76712261	micronutrient (%)	plant trait
LN	CML218	N	1.914738439	micronutrient (%)	plant trait
LN	CML218	P	0.310856807	micronutrient (%)	plant trait
LN	CML218	S	0.130065077	micronutrient (%)	plant trait
LN	CML218	Zn	18.41778022	micronutrient (%)	plant trait
HN	CML218	CC_Aug12	86.774742645	canopy coverage (%)	plant trait
HN	CML218	ExG_Aug12	0.3930638	excess green index	plant trait
HN	CML218	CHL	396.6771492	chlorophyll content (µmol/m2)	plant trait
HN	CML218	DW	6.855602666	leaf dry weight (g)	plant trait
HN	CML218	FW	26.4473372	leaf fresh weight (g)	plant trait
HN	CML218	LA	1173.179087	leaf area (m2)	plant trait
HN	CML218	B	22.14877786	micronutrient (%)	plant trait
HN	CML218	Ca	0.421140577	micronutrient (%)	plant trait
HN	CML218	Cu	12.8616463	micronutrient (%)	plant trait
HN	CML218	Fe	111.7972113	micronutrient (%)	plant trait
HN	CML218	K	2.063470367	micronutrient (%)	plant trait
HN	CML218	Mg	0.247874534	micronutrient (%)	plant trait
HN	CML218	Mn	66.20218775	micronutrient (%)	plant trait
HN	CML218	N	2.881491896	micronutrient (%)	plant trait
HN	CML218	P	0.309468897	micronutrient (%)	plant trait
HN	CML218	S	0.190199186	micronutrient (%)	plant trait
HN	CML218	Zn	28.54120924	micronutrient (%)	plant trait
LN	CML220	CC_Aug12	65.65418641	canopy coverage (%)	plant trait
LN	CML220	ExG_Aug12	0.3422576	excess green index	plant trait
LN	CML220	CHL	281.2837405	chlorophyll content (µmol/m2)	plant trait
LN	CML220	DW	6.162697693	leaf dry weight (g)	plant trait
LN	CML220	FW	23.92818233	leaf fresh weight (g)	plant trait
LN	CML220	LA	1040.096659	leaf area (m2)	plant trait
LN	CML220	B	11.57285089	micronutrient (%)	plant trait
LN	CML220	Ca	0.215457059	micronutrient (%)	plant trait
LN	CML220	Cu	5.487184481	micronutrient (%)	plant trait
LN	CML220	Fe	62.63308746	micronutrient (%)	plant trait
LN	CML220	K	2.29183681	micronutrient (%)	plant trait
LN	CML220	Mg	0.102694842	micronutrient (%)	plant trait
LN	CML220	Mn	50.93136175	micronutrient (%)	plant trait
LN	CML220	N	1.928721602	micronutrient (%)	plant trait
LN	CML220	P	0.298812386	micronutrient (%)	plant trait
LN	CML220	S	0.146292662	micronutrient (%)	plant trait
LN	CML220	Zn	22.57765115	micronutrient (%)	plant trait
HN	CML220	CC_Aug12	66.73177355	canopy coverage (%)	plant trait
HN	CML220	ExG_Aug12	0.3800635828831045	excess green index	plant trait
HN	CML220	CHL	418.6269959	chlorophyll content (µmol/m2)	plant trait
HN	CML220	DW	7.45627366	leaf dry weight (g)	plant trait
HN	CML220	FW	30.26578458	leaf fresh weight (g)	plant trait
HN	CML220	LA	1259.836429	leaf area (m2)	plant trait
HN	CML220	B	11.83698684	micronutrient (%)	plant trait
HN	CML220	Ca	0.278482726	micronutrient (%)	plant trait
HN	CML220	Cu	9.36157341	micronutrient (%)	plant trait
HN	CML220	Fe	91.49836683	micronutrient (%)	plant trait
HN	CML220	K	2.38922575	micronutrient (%)	plant trait
HN	CML220	Mg	0.155391589	micronutrient (%)	plant trait
HN	CML220	N	2.830154856	micronutrient (%)	plant trait
HN	CML220	P	0.299095864	micronutrient (%)	plant trait
HN	CML220	S	0.176770802	micronutrient (%)	plant trait
HN	CML220	Zn	24.74654892	micronutrient (%)	plant trait
LN	CML254	CC_Aug12	87.39980472	canopy coverage (%)	plant trait
LN	CML254	ExG_Aug12	0.3590943	excess green index	plant trait
LN	CML254	CHL	245.9702498	chlorophyll content (µmol/m2)	plant trait
LN	CML254	DW	5.52631717	leaf dry weight (g)	plant trait
LN	CML254	LA	1033.517823	leaf area (m2)	plant trait
LN	CML254	Ca	0.299758808	micronutrient (%)	plant trait
LN	CML254	Cu	5.127553566	micronutrient (%)	plant trait
LN	CML254	Fe	64.82243512	micronutrient (%)	plant trait
LN	CML254	K	2.211417351	micronutrient (%)	plant trait
LN	CML254	Mg	0.195707806	micronutrient (%)	plant trait
LN	CML254	Mn	54.26275307	micronutrient (%)	plant trait
LN	CML254	N	1.828508935	micronutrient (%)	plant trait
LN	CML254	P	0.277132428	micronutrient (%)	plant trait
LN	CML254	S	0.139801628	micronutrient (%)	plant trait
LN	CML254	Zn	21.44314089	micronutrient (%)	plant trait
HN	CML254	CC_Aug12	86.35294035	canopy coverage (%)	plant trait
HN	CML254	ExG_Aug12	0.4047023	excess green index	plant trait
HN	CML254	CHL	358.2083625	chlorophyll content (µmol/m2)	plant trait
HN	CML254	LA	1251.676199	leaf area (m2)	plant trait
HN	CML254	B	15.83854408	micronutrient (%)	plant trait
HN	CML254	Ca	0.437009777	micronutrient (%)	plant trait
HN	CML254	Cu	9.005943306	micronutrient (%)	plant trait
HN	CML254	Fe	100.6098044	micronutrient (%)	plant trait
HN	CML254	K	2.426930199	micronutrient (%)	plant trait
HN	CML254	Mg	0.291583872	micronutrient (%)	plant trait
HN	CML254	Mn	92.27376641	micronutrient (%)	plant trait
HN	CML254	N	2.744565892	micronutrient (%)	plant trait
HN	CML254	P	0.279607922	micronutrient (%)	plant trait
HN	CML254	S	0.179406767	micronutrient (%)	plant trait
HN	CML254	Zn	29.15896355	micronutrient (%)	plant trait
LN	CML261	CC_Aug12	70.98571721	canopy coverage (%)	plant trait
LN	CML261	ExG_Aug12	0.3491546	excess green index	plant trait
LN	CML261	CHL	273.2420545	chlorophyll content (µmol/m2)	plant trait
LN	CML261	DW	6.94919875	leaf dry weight (g)	plant trait
LN	CML261	FW	29.35854441	leaf fresh weight (g)	plant trait
LN	CML261	LA	1264.144131	leaf area (m2)	plant trait
LN	CML261	B	14.5704684	micronutrient (%)	plant trait
LN	CML261	Ca	0.265271729	micronutrient (%)	plant trait
LN	CML261	Cu	5.846815396	micronutrient (%)	plant trait
LN	CML261	Fe	67.74156535	micronutrient (%)	plant trait
LN	CML261	K	2.082046916	micronutrient (%)	plant trait
LN	CML261	Mg	0.155267387	micronutrient (%)	plant trait
LN	CML261	Mn	47.18354652	micronutrient (%)	plant trait
LN	CML261	N	1.854144734	micronutrient (%)	plant trait
LN	CML261	P	0.27231466	micronutrient (%)	plant trait
LN	CML261	S	0.136556111	micronutrient (%)	plant trait
LN	CML261	Zn	15.77058962	micronutrient (%)	plant trait
HN	CML261	CC_Aug12	62.50690285	canopy coverage (%)	plant trait
HN	CML261	ExG_Aug12	0.3733549	excess green index	plant trait
HN	CML261	CHL	335.4781262	chlorophyll content (µmol/m2)	plant trait
HN	CML261	LA	1307.900221	leaf area (m2)	plant trait
HN	CML261	B	14.38343235	micronutrient (%)	plant trait
HN	CML261	Cu	7.227792785	micronutrient (%)	plant trait
HN	CML261	Fe	89.16753396	micronutrient (%)	plant trait
HN	CML261	K	2.084448127	micronutrient (%)	plant trait
HN	CML261	Mg	0.212735708	micronutrient (%)	plant trait
[truncated: 70,674 more rows]
